# Supplementary material for: Syntheses and NLO properties of 1D heterothiometallic anionic W/S/Ag clusters possessing solvento-ytterbium cation-directed isomeric skeletons
Source: Royal Society of Chemistry journal article supplement (doi:10.1039/c0nj00674b), 2010-11-15
Supplement: c0nj00674b.pdf [file c0nj00674b.pdf]

# **Syntheses and NLO Properties of 1D Heterothiometallic Anionic W/S/Ag Clusters Possessing Solvento-Ytterbium Cation-Directed Isomeric Skeletons**

**Jinfang Zhang,<sup>a</sup> Suci Meng,<sup>a</sup> Yinglin Song,<sup>b</sup> Junyi Yang,<sup>b</sup> Marie P. Cifuentes,<sup>c</sup>**

**Mark G. Humphrey\*<sup>c</sup> and Chi Zhang\*<sup>a</sup>**

<sup>a</sup> *Molecular Materials Research Center, Scientific Research Academy, School of Chemistry and  
Chemical Engineering, Jiangsu University, Zhenjiang 212013, P. R. China*

<sup>b</sup> *School of Physical Science and Technology, Suzhou University, Suzhou 215006, P. R. China*

<sup>c</sup> *Research School of Chemistry, Australian National University, Canberra, ACT 0200, Australia*

**Supporting Information**

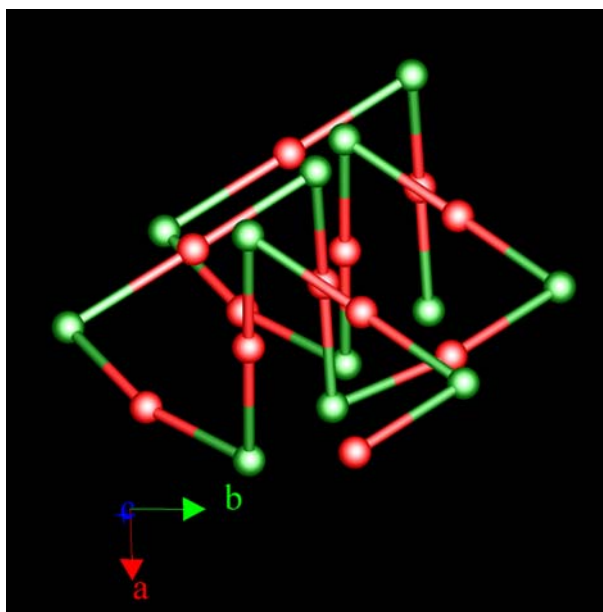

**Figure S1.** Ball and stick diagram of the anionic skeleton of cluster **1** viewed along the *c*-axis, only showing interactions between metallic atoms. (Ag red, W green)

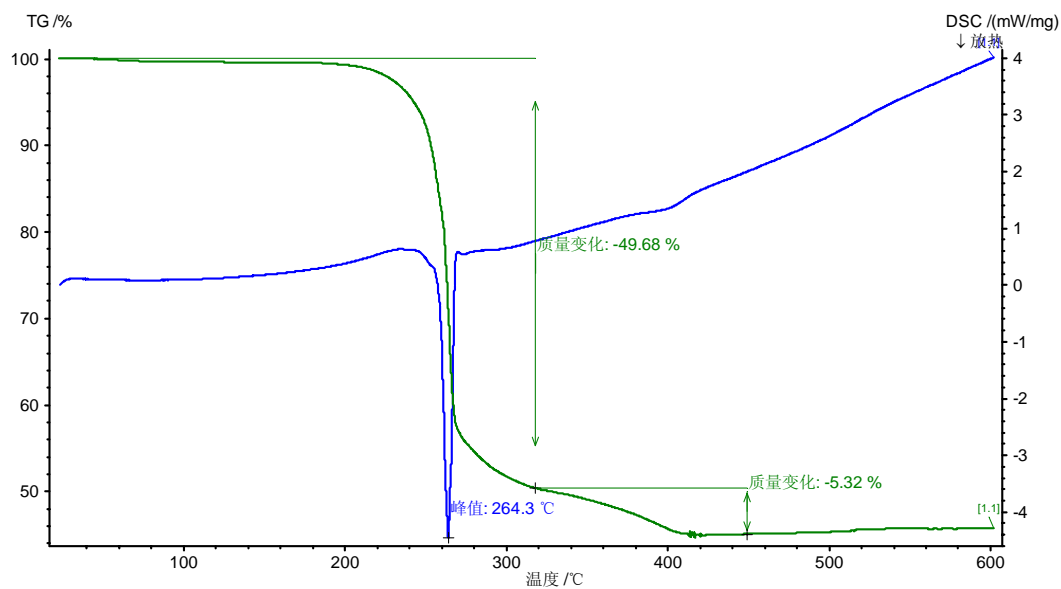

**Figure S2.** Thermogravimetric analysis for  $\{[Yb(HMP)_4(NO_3)_2][WS_4Ag]\}_n$  (Calcd: 49.99% for HMP; 8.65% for  $NO_3^-$ ; 41.36% for YbAgWS).

Cartesian coordinates, the relevant TD-DFT/PCM data (including the electronic excitation energies, oscillator strengths, and transition components), and the corresponding atomic orbital coefficients of the absorption spectra of clusters **1**, **2**, and **3** in solution are as follows:

**Cartesian coordinates of cluster 1:**

|    |             |             |              |
|----|-------------|-------------|--------------|
| W  | 25.59263850 | 37.48418200 | -13.06235160 |
| W  | 21.09561660 | 44.09031800 | -3.67213720  |
| W  | 20.54794470 | 40.23464100 | -8.08103070  |
| W  | 25.04496670 | 41.33985900 | -17.47124510 |
| W  | 25.78853750 | 42.50544200 | -9.99325390  |
| W  | 30.28555940 | 39.06905800 | -19.38346830 |
| Ag | 24.87945140 | 39.29397050 | -15.32727130 |
| Ag | 20.38242950 | 42.28052950 | -5.93705690  |
| Ag | 23.13937610 | 41.42586180 | -9.04540570  |
| Ag | 27.63639800 | 40.14887130 | -18.43562010 |
| Ag | 25.93731130 | 40.11274540 | -11.76349710 |
| S  | 27.55147180 | 38.29992700 | -12.46813880 |
| S  | 23.05444990 | 43.27457300 | -3.07792450  |
| S  | 25.10477530 | 35.85828560 | -11.75204110 |
| S  | 20.60775340 | 45.71621440 | -2.36182670  |
| S  | 19.43965950 | 42.58655040 | -3.53691810  |
| S  | 23.93668140 | 38.98794960 | -12.92713250 |
| S  | 21.25018810 | 44.82495470 | -5.72446250  |
| S  | 25.74721010 | 36.74954530 | -15.11467690 |
| S  | 24.59125450 | 43.42793310 | -17.28400420 |
| S  | 20.09423250 | 38.14656690 | -7.89378980  |
| S  | 21.00576800 | 40.62619860 | -10.20603620 |
| S  | 25.50278990 | 40.94830140 | -19.59625060 |
| S  | 18.71811100 | 41.34964790 | -7.55668110  |
| S  | 23.21513300 | 40.22485210 | -16.94689550 |
| S  | 22.26538230 | 40.72828330 | -6.71513010  |
| S  | 26.76240430 | 40.84621670 | -16.10534450 |
| S  | 28.44894410 | 37.85662780 | -19.23115900 |
| S  | 23.95192220 | 43.71787220 | -9.84094470  |
| S  | 30.97052840 | 39.05390840 | -21.48556170 |
| S  | 26.47350640 | 42.52059160 | -12.09534730 |
| S  | 25.49698610 | 40.43531430 | -9.20804420  |
| S  | 29.99400810 | 41.13918570 | -18.59825860 |
| S  | 31.81578110 | 38.10577960 | -18.21532560 |
| S  | 27.31875920 | 43.46872030 | -8.82511130  |

**Cluster 1 B3LYP/LanL2DZf+6-31Gd TD-PCM (300 states) in DMSO (dielectric constant= 48.9)**

Excitation energies and oscillator strengths:

|               |    |           |           |           |          |
|---------------|----|-----------|-----------|-----------|----------|
| Excited State | 1: | Singlet-A | 2.5292 eV | 490.21 nm | f=0.0022 |
| 285 ->286     |    | 0.20280   |           |           |          |
| 285 ->287     |    | 0.24555   |           |           |          |
| 285 ->288     |    | -0.22883  |           |           |          |
| 285 ->289     |    | -0.21181  |           |           |          |
| 285 ->290     |    | 0.42586   |           |           |          |
| 285 ->291     |    | 0.16030   |           |           |          |
| 285 ->292     |    | -0.10294  |           |           |          |

This state for optimization and/or second-order correction.

Total Energy, E(RPA) = -10694.8130763

Copying the excited state density for this state as the 1-particle RhoCI density.

|               |    |           |           |           |          |
|---------------|----|-----------|-----------|-----------|----------|
| Excited State | 2: | Singlet-A | 2.5520 eV | 485.84 nm | f=0.0003 |
| 273 ->286     |    | -0.10213  |           |           |          |
| 284 ->286     |    | 0.39481   |           |           |          |
| 284 ->287     |    | -0.32204  |           |           |          |
| 284 ->288     |    | 0.27571   |           |           |          |
| 284 ->290     |    | 0.19515   |           |           |          |
| 284 ->291     |    | -0.13514  |           |           |          |

|               |    |           |           |           |          |
|---------------|----|-----------|-----------|-----------|----------|
| Excited State | 3: | Singlet-A | 2.5611 eV | 484.10 nm | f=0.0031 |
| 274 ->287     |    | 0.13546   |           |           |          |
| 285 ->286     |    | 0.31857   |           |           |          |
| 285 ->287     |    | 0.44554   |           |           |          |
| 285 ->288     |    | 0.13489   |           |           |          |
| 285 ->290     |    | -0.20758  |           |           |          |
| 285 ->291     |    | -0.17561  |           |           |          |
| 285 ->292     |    | 0.16013   |           |           |          |

|               |    |           |           |           |          |
|---------------|----|-----------|-----------|-----------|----------|
| Excited State | 4: | Singlet-A | 2.5837 eV | 479.87 nm | f=0.0001 |
| 280 ->286     |    | -0.11207  |           |           |          |
| 280 ->289     |    | -0.10299  |           |           |          |
| 283 ->286     |    | 0.30337   |           |           |          |
| 283 ->287     |    | -0.23523  |           |           |          |
| 283 ->289     |    | 0.36231   |           |           |          |
| 283 ->290     |    | 0.20475   |           |           |          |
| 283 ->292     |    | 0.16774   |           |           |          |

|               |    |           |           |           |          |
|---------------|----|-----------|-----------|-----------|----------|
| Excited State | 5: | Singlet-A | 2.6137 eV | 474.37 nm | f=0.0002 |
| 276 ->287     |    | -0.12819  |           |           |          |
| 277 ->287     |    | -0.14453  |           |           |          |
| 280 ->286     |    | 0.22853   |           |           |          |
| 280 ->287     |    | 0.24340   |           |           |          |
| 281 ->286     |    | -0.20873  |           |           |          |
| 281 ->287     |    | -0.22330  |           |           |          |
| 282 ->286     |    | 0.18232   |           |           |          |
| 282 ->287     |    | 0.17902   |           |           |          |
| 283 ->286     |    | 0.16512   |           |           |          |
| 283 ->287     |    | 0.13996   |           |           |          |
| Excited State | 6: | Singlet-A | 2.6257 eV | 472.20 nm | f=0.0014 |
| 283 ->286     |    | -0.29050  |           |           |          |
| 283 ->287     |    | 0.20178   |           |           |          |
| 283 ->289     |    | 0.17888   |           |           |          |
| 283 ->291     |    | 0.30250   |           |           |          |
| 283 ->292     |    | 0.32461   |           |           |          |
| Excited State | 7: | Singlet-A | 2.6391 eV | 469.80 nm | f=0.0010 |
| 280 ->286     |    | -0.11047  |           |           |          |
| 283 ->286     |    | 0.26393   |           |           |          |
| 283 ->287     |    | -0.11582  |           |           |          |
| 283 ->289     |    | -0.26777  |           |           |          |
| 283 ->290     |    | -0.24028  |           |           |          |
| 283 ->291     |    | 0.27835   |           |           |          |
| 283 ->292     |    | 0.13490   |           |           |          |
| Excited State | 8: | Singlet-A | 2.6532 eV | 467.30 nm | f=0.0006 |
| 276 ->286     |    | -0.13146  |           |           |          |
| 276 ->288     |    | 0.10118   |           |           |          |
| 277 ->286     |    | -0.17857  |           |           |          |
| 277 ->288     |    | 0.14138   |           |           |          |
| 280 ->286     |    | -0.11605  |           |           |          |
| 280 ->287     |    | 0.13042   |           |           |          |
| 280 ->288     |    | 0.21538   |           |           |          |
| 280 ->289     |    | -0.10360  |           |           |          |
| 281 ->287     |    | -0.12062  |           |           |          |
| 281 ->288     |    | -0.18586  |           |           |          |
| 282 ->287     |    | 0.11049   |           |           |          |
| 282 ->288     |    | 0.16230   |           |           |          |
| 283 ->287     |    | 0.10345   |           |           |          |
| 283 ->288     |    | 0.10834   |           |           |          |
| 283 ->291     |    | -0.12616  |           |           |          |

|               |     |           |           |           |          |
|---------------|-----|-----------|-----------|-----------|----------|
| 283 ->292     |     | -0.16218  |           |           |          |
| Excited State | 9:  | Singlet-A | 2.6820 eV | 462.29 nm | f=0.0001 |
| 277 ->288     |     | -0.12534  |           |           |          |
| 277 ->289     |     | -0.12920  |           |           |          |
| 280 ->288     |     | 0.13204   |           |           |          |
| 280 ->289     |     | 0.19560   |           |           |          |
| 281 ->288     |     | -0.10302  |           |           |          |
| 281 ->289     |     | -0.15231  |           |           |          |
| 282 ->288     |     | 0.12965   |           |           |          |
| 282 ->289     |     | 0.14539   |           |           |          |
| 283 ->288     |     | 0.19814   |           |           |          |
| 283 ->289     |     | 0.12489   |           |           |          |
| 283 ->291     |     | 0.12920   |           |           |          |
| 283 ->292     |     | -0.11635  |           |           |          |
| 283 ->293     |     | 0.14476   |           |           |          |
| Excited State | 10: | Singlet-A | 2.7080 eV | 457.84 nm | f=0.0031 |
| 269 ->293     |     | 0.11076   |           |           |          |
| 280 ->288     |     | -0.11328  |           |           |          |
| 280 ->291     |     | -0.13675  |           |           |          |
| 280 ->293     |     | 0.29986   |           |           |          |
| 281 ->288     |     | 0.11542   |           |           |          |
| 281 ->291     |     | 0.10762   |           |           |          |
| 281 ->293     |     | -0.26117  |           |           |          |
| 282 ->288     |     | -0.10851  |           |           |          |
| 282 ->293     |     | 0.20878   |           |           |          |
| 283 ->288     |     | -0.15685  |           |           |          |
| 283 ->293     |     | 0.12714   |           |           |          |
| Excited State | 11: | Singlet-A | 2.7162 eV | 456.46 nm | f=0.0005 |
| 274 ->286     |     | -0.13257  |           |           |          |
| 274 ->287     |     | -0.18090  |           |           |          |
| 280 ->286     |     | 0.11180   |           |           |          |
| 280 ->287     |     | 0.14667   |           |           |          |
| 281 ->286     |     | 0.11416   |           |           |          |
| 281 ->287     |     | 0.16662   |           |           |          |
| 281 ->296     |     | -0.13575  |           |           |          |
| 285 ->294     |     | 0.38723   |           |           |          |
| 285 ->296     |     | 0.30525   |           |           |          |
| Excited State | 12: | Singlet-A | 2.7197 eV | 455.87 nm | f=0.0019 |
| 270 ->288     |     | 0.10381   |           |           |          |
| 272 ->288     |     | -0.13934  |           |           |          |

|           |          |
|-----------|----------|
| 275 ->286 | -0.13510 |
| 275 ->287 | 0.11527  |
| 275 ->289 | 0.12022  |
| 276 ->286 | 0.23727  |
| 276 ->287 | -0.10943 |
| 277 ->286 | -0.23801 |
| 277 ->287 | 0.12319  |
| 277 ->288 | 0.11084  |
| 277 ->290 | 0.12332  |
| 277 ->292 | 0.10057  |
| 280 ->288 | -0.12700 |
| 283 ->288 | 0.24093  |
| 283 ->290 | 0.11583  |
| 283 ->292 | 0.10285  |

Excited State 13: Singlet-A 2.7329 eV 453.67 nm f=0.0006

|           |          |
|-----------|----------|
| 274 ->286 | 0.15739  |
| 274 ->287 | 0.21314  |
| 276 ->288 | 0.16807  |
| 280 ->286 | -0.12776 |
| 280 ->287 | -0.16522 |
| 281 ->286 | -0.13690 |
| 281 ->287 | -0.18627 |
| 283 ->288 | 0.12254  |
| 285 ->294 | 0.21609  |
| 285 ->296 | 0.25010  |

Excited State 14: Singlet-A 2.7345 eV 453.41 nm f=0.0067

|           |          |
|-----------|----------|
| 274 ->287 | -0.10807 |
| 275 ->288 | 0.13257  |
| 275 ->291 | 0.10669  |
| 276 ->288 | 0.24611  |
| 276 ->291 | 0.13211  |
| 277 ->286 | 0.11298  |
| 281 ->287 | 0.14473  |
| 283 ->288 | 0.22302  |
| 285 ->294 | -0.16232 |
| 285 ->296 | -0.18048 |

Excited State 15: Singlet-A 2.7497 eV 450.90 nm f=0.0088

|           |          |
|-----------|----------|
| 282 ->295 | -0.10143 |
| 282 ->297 | -0.12982 |
| 284 ->289 | 0.37335  |
| 284 ->290 | 0.21546  |



|                   |           |           |           |          |  |
|-------------------|-----------|-----------|-----------|----------|--|
| 284 ->291         | -0.29699  |           |           |          |  |
| 284 ->292         | -0.17359  |           |           |          |  |
| 284 ->293         | -0.13461  |           |           |          |  |
| 284 ->295         | -0.25976  |           |           |          |  |
| Excited State 16: | Singlet-A | 2.7613 eV | 449.01 nm | f=0.0063 |  |
| 272 ->286         | -0.12134  |           |           |          |  |
| 275 ->286         | -0.10937  |           |           |          |  |
| 275 ->288         | -0.17934  |           |           |          |  |
| 276 ->289         | -0.10467  |           |           |          |  |
| 276 ->292         | 0.17007   |           |           |          |  |
| 276 ->293         | 0.14352   |           |           |          |  |
| 277 ->286         | 0.10416   |           |           |          |  |
| 277 ->288         | -0.13487  |           |           |          |  |
| 277 ->292         | -0.12674  |           |           |          |  |
| 283 ->286         | -0.12510  |           |           |          |  |
| 283 ->288         | 0.19438   |           |           |          |  |
| 283 ->289         | -0.16169  |           |           |          |  |
| 283 ->290         | 0.15516   |           |           |          |  |
| 283 ->292         | 0.14384   |           |           |          |  |
| Excited State 17: | Singlet-A | 2.7816 eV | 445.73 nm | f=0.0004 |  |
| 279 ->295         | -0.21905  |           |           |          |  |
| 280 ->295         | -0.11248  |           |           |          |  |
| 281 ->295         | 0.13106   |           |           |          |  |
| 282 ->295         | 0.42907   |           |           |          |  |
| 282 ->297         | 0.32351   |           |           |          |  |
| 283 ->295         | -0.14591  |           |           |          |  |
| 283 ->297         | -0.12593  |           |           |          |  |
| 284 ->289         | 0.10221   |           |           |          |  |
| Excited State 18: | Singlet-A | 2.7838 eV | 445.38 nm | f=0.0003 |  |
| 278 ->287         | 0.13437   |           |           |          |  |
| 278 ->294         | 0.58358   |           |           |          |  |
| 280 ->294         | 0.17252   |           |           |          |  |
| 281 ->294         | 0.19728   |           |           |          |  |
| 281 ->296         | -0.11246  |           |           |          |  |
| Excited State 19: | Singlet-A | 2.7941 eV | 443.74 nm | f=0.0074 |  |
| 270 ->286         | -0.11790  |           |           |          |  |
| 272 ->286         | 0.12349   |           |           |          |  |
| 275 ->286         | 0.14280   |           |           |          |  |
| 275 ->287         | -0.12864  |           |           |          |  |
| 275 ->288         | 0.10208   |           |           |          |  |

|                   |           |           |           |          |
|-------------------|-----------|-----------|-----------|----------|
| 275 ->289         | -0.10875  |           |           |          |
| 276 ->286         | -0.13495  |           |           |          |
| 276 ->287         | 0.11623   |           |           |          |
| 276 ->288         | -0.18195  |           |           |          |
| 277 ->288         | 0.15789   |           |           |          |
| 277 ->292         | 0.10880   |           |           |          |
| 283 ->287         | -0.11434  |           |           |          |
| 283 ->288         | 0.25139   |           |           |          |
| 283 ->289         | -0.12925  |           |           |          |
| 283 ->290         | 0.11988   |           |           |          |
| 283 ->292         | 0.10789   |           |           |          |
| Excited State 20: | Singlet-A | 2.8163 eV | 440.24 nm | f=0.0046 |
| 279 ->295         | 0.29744   |           |           |          |
| 282 ->297         | 0.21134   |           |           |          |
| 283 ->297         | -0.11057  |           |           |          |
| 284 ->286         | -0.10563  |           |           |          |
| 284 ->289         | 0.15137   |           |           |          |
| 284 ->290         | 0.13937   |           |           |          |
| 284 ->291         | -0.12948  |           |           |          |
| 284 ->295         | 0.35096   |           |           |          |
| 284 ->297         | -0.27938  |           |           |          |
| Excited State 21: | Singlet-A | 2.8235 eV | 439.11 nm | f=0.0022 |
| 278 ->294         | 0.19787   |           |           |          |
| 280 ->289         | -0.10321  |           |           |          |
| 280 ->294         | -0.14064  |           |           |          |
| 280 ->296         | 0.17735   |           |           |          |
| 281 ->289         | 0.15159   |           |           |          |
| 281 ->293         | 0.11694   |           |           |          |
| 281 ->294         | -0.17439  |           |           |          |
| 281 ->296         | 0.21853   |           |           |          |
| 285 ->289         | 0.10209   |           |           |          |
| 285 ->296         | 0.11910   |           |           |          |
| Excited State 22: | Singlet-A | 2.8316 eV | 437.86 nm | f=0.0001 |
| 274 ->287         | -0.11790  |           |           |          |
| 278 ->294         | 0.21003   |           |           |          |
| 280 ->289         | 0.12756   |           |           |          |
| 280 ->294         | -0.14906  |           |           |          |
| 280 ->296         | 0.21406   |           |           |          |
| 281 ->289         | -0.10389  |           |           |          |
| 281 ->294         | -0.20609  |           |           |          |
| 281 ->296         | 0.25954   |           |           |          |

|                   |           |           |           |          |
|-------------------|-----------|-----------|-----------|----------|
| Excited State 23: | Singlet-A | 2.8644 eV | 432.85 nm | f=0.0038 |
| 279 ->295         | 0.29827   |           |           |          |
| 279 ->297         | -0.31391  |           |           |          |
| 282 ->295         | 0.14386   |           |           |          |
| 283 ->297         | 0.10101   |           |           |          |
| 284 ->295         | 0.18974   |           |           |          |
| 284 ->297         | 0.41703   |           |           |          |

|                   |           |           |           |          |
|-------------------|-----------|-----------|-----------|----------|
| Excited State 24: | Singlet-A | 2.8714 eV | 431.79 nm | f=0.0040 |
| 280 ->290         | -0.22470  |           |           |          |
| 280 ->291         | -0.18917  |           |           |          |
| 281 ->290         | 0.24000   |           |           |          |
| 281 ->291         | 0.18927   |           |           |          |
| 282 ->290         | -0.17677  |           |           |          |
| 282 ->291         | -0.14053  |           |           |          |
| 283 ->290         | -0.10998  |           |           |          |
| 285 ->288         | 0.14691   |           |           |          |
| 285 ->289         | 0.16593   |           |           |          |
| 285 ->291         | 0.15952   |           |           |          |

|                   |           |           |           |          |
|-------------------|-----------|-----------|-----------|----------|
| Excited State 25: | Singlet-A | 2.9019 eV | 427.25 nm | f=0.0007 |
| 276 ->288         | -0.10816  |           |           |          |
| 276 ->291         | -0.10668  |           |           |          |
| 280 ->289         | -0.14885  |           |           |          |
| 281 ->289         | 0.10645   |           |           |          |
| 281 ->292         | 0.10210   |           |           |          |
| 285 ->286         | -0.13600  |           |           |          |
| 285 ->288         | -0.24810  |           |           |          |
| 285 ->289         | -0.16913  |           |           |          |
| 285 ->291         | -0.23876  |           |           |          |
| 285 ->292         | 0.28119   |           |           |          |
| 285 ->296         | -0.14296  |           |           |          |

|                   |           |           |           |          |
|-------------------|-----------|-----------|-----------|----------|
| Excited State 26: | Singlet-A | 2.9219 eV | 424.32 nm | f=0.0082 |
| 285 ->286         | -0.27415  |           |           |          |
| 285 ->287         | 0.17104   |           |           |          |
| 285 ->288         | 0.37600   |           |           |          |
| 285 ->289         | -0.12929  |           |           |          |
| 285 ->293         | -0.21735  |           |           |          |
| 285 ->294         | 0.18352   |           |           |          |
| 285 ->296         | -0.18582  |           |           |          |

|                   |           |           |           |          |
|-------------------|-----------|-----------|-----------|----------|
| Excited State 27: | Singlet-A | 2.9352 eV | 422.40 nm | f=0.0057 |
|-------------------|-----------|-----------|-----------|----------|

|                   |           |           |           |          |  |
|-------------------|-----------|-----------|-----------|----------|--|
| 274 ->290         | -0.15269  |           |           |          |  |
| 280 ->288         | -0.11168  |           |           |          |  |
| 280 ->290         | 0.21520   |           |           |          |  |
| 281 ->286         | 0.12288   |           |           |          |  |
| 281 ->287         | 0.14903   |           |           |          |  |
| 281 ->288         | -0.15954  |           |           |          |  |
| 281 ->289         | -0.12847  |           |           |          |  |
| 281 ->290         | 0.22583   |           |           |          |  |
| 281 ->291         | 0.10723   |           |           |          |  |
| 281 ->292         | -0.15421  |           |           |          |  |
| 282 ->286         | -0.17764  |           |           |          |  |
| 282 ->287         | 0.10198   |           |           |          |  |
| 285 ->286         | -0.10023  |           |           |          |  |
| Excited State 28: | Singlet-A | 2.9354 eV | 422.37 nm | f=0.0026 |  |
| 281 ->286         | 0.13901   |           |           |          |  |
| 282 ->286         | 0.21862   |           |           |          |  |
| 282 ->287         | -0.16890  |           |           |          |  |
| 282 ->288         | 0.12978   |           |           |          |  |
| 284 ->286         | -0.30236  |           |           |          |  |
| 284 ->287         | 0.11169   |           |           |          |  |
| 284 ->288         | 0.30596   |           |           |          |  |
| 284 ->289         | -0.12460  |           |           |          |  |
| 284 ->290         | 0.14426   |           |           |          |  |
| Excited State 29: | Singlet-A | 2.9400 eV | 421.72 nm | f=0.0265 |  |
| 280 ->292         | -0.20051  |           |           |          |  |
| 281 ->292         | 0.14107   |           |           |          |  |
| 282 ->286         | 0.21624   |           |           |          |  |
| 282 ->287         | -0.18023  |           |           |          |  |
| 282 ->292         | -0.10729  |           |           |          |  |
| 285 ->294         | -0.20051  |           |           |          |  |
| 285 ->296         | 0.23126   |           |           |          |  |
| Excited State 30: | Singlet-A | 2.9466 eV | 420.78 nm | f=0.0147 |  |
| 280 ->286         | -0.13084  |           |           |          |  |
| 280 ->292         | 0.11811   |           |           |          |  |
| 281 ->286         | 0.11636   |           |           |          |  |
| 282 ->286         | 0.28180   |           |           |          |  |
| 282 ->287         | -0.18430  |           |           |          |  |
| 282 ->288         | 0.10932   |           |           |          |  |
| 282 ->292         | 0.11228   |           |           |          |  |
| 283 ->287         | 0.11288   |           |           |          |  |
| 284 ->286         | 0.22334   |           |           |          |  |

|                   |           |           |           |          |  |
|-------------------|-----------|-----------|-----------|----------|--|
| 284 ->288         | -0.27929  |           |           |          |  |
| 284 ->289         | 0.14586   |           |           |          |  |
| Excited State 31: | Singlet-A | 2.9567 eV | 419.34 nm | f=0.0192 |  |
| 277 ->293         | -0.10268  |           |           |          |  |
| 280 ->292         | -0.15434  |           |           |          |  |
| 281 ->290         | 0.10404   |           |           |          |  |
| 283 ->288         | -0.12468  |           |           |          |  |
| 283 ->293         | 0.10622   |           |           |          |  |
| 285 ->286         | 0.26551   |           |           |          |  |
| 285 ->287         | -0.21380  |           |           |          |  |
| 285 ->289         | 0.14360   |           |           |          |  |
| 285 ->294         | 0.25822   |           |           |          |  |
| 285 ->296         | -0.20131  |           |           |          |  |
| Excited State 32: | Singlet-A | 2.9603 eV | 418.82 nm | f=0.0151 |  |
| 276 ->293         | -0.11361  |           |           |          |  |
| 277 ->289         | -0.10645  |           |           |          |  |
| 277 ->293         | -0.19685  |           |           |          |  |
| 283 ->288         | -0.16394  |           |           |          |  |
| 283 ->290         | 0.12256   |           |           |          |  |
| 283 ->291         | -0.16419  |           |           |          |  |
| 283 ->292         | 0.14303   |           |           |          |  |
| 283 ->293         | 0.28661   |           |           |          |  |
| 285 ->286         | -0.25156  |           |           |          |  |
| 285 ->287         | 0.18789   |           |           |          |  |
| Excited State 33: | Singlet-A | 2.9799 eV | 416.06 nm | f=0.0141 |  |
| 285 ->286         | -0.20028  |           |           |          |  |
| 285 ->287         | 0.16101   |           |           |          |  |
| 285 ->288         | -0.15811  |           |           |          |  |
| 285 ->289         | 0.33256   |           |           |          |  |
| 285 ->293         | 0.36600   |           |           |          |  |
| 285 ->294         | 0.20058   |           |           |          |  |
| 285 ->296         | -0.18039  |           |           |          |  |
| Excited State 34: | Singlet-A | 2.9986 eV | 413.47 nm | f=0.0011 |  |
| 276 ->287         | 0.10461   |           |           |          |  |
| 276 ->289         | -0.12253  |           |           |          |  |
| 277 ->289         | 0.19537   |           |           |          |  |
| 279 ->286         | -0.12995  |           |           |          |  |
| 279 ->287         | 0.15050   |           |           |          |  |
| 280 ->287         | -0.15992  |           |           |          |  |
| 283 ->286         | 0.24830   |           |           |          |  |

|                   |           |           |           |          |
|-------------------|-----------|-----------|-----------|----------|
| 283 ->287         | 0.37015   |           |           |          |
| Excited State 35: | Singlet-A | 3.0043 eV | 412.69 nm | f=0.0060 |
| 275 ->289         | -0.11756  |           |           |          |
| 276 ->289         | 0.16549   |           |           |          |
| 277 ->289         | -0.14334  |           |           |          |
| 277 ->292         | -0.11452  |           |           |          |
| 279 ->286         | 0.24568   |           |           |          |
| 279 ->287         | -0.15191  |           |           |          |
| 279 ->290         | 0.10489   |           |           |          |
| 280 ->287         | -0.12889  |           |           |          |
| 282 ->286         | 0.10018   |           |           |          |
| 283 ->286         | 0.17641   |           |           |          |
| 283 ->287         | 0.27989   |           |           |          |
| 283 ->290         | 0.11135   |           |           |          |
| Excited State 36: | Singlet-A | 3.0175 eV | 410.88 nm | f=0.0009 |
| 276 ->286         | -0.12880  |           |           |          |
| 276 ->289         | -0.11441  |           |           |          |
| 277 ->286         | 0.11588   |           |           |          |
| 277 ->287         | -0.11243  |           |           |          |
| 277 ->289         | 0.12916   |           |           |          |
| 277 ->292         | 0.13509   |           |           |          |
| 279 ->286         | 0.32810   |           |           |          |
| 279 ->287         | -0.23913  |           |           |          |
| 279 ->288         | 0.20264   |           |           |          |
| 279 ->289         | -0.16607  |           |           |          |
| 284 ->292         | 0.11657   |           |           |          |
| 284 ->295         | -0.13009  |           |           |          |
| Excited State 37: | Singlet-A | 3.0251 eV | 409.84 nm | f=0.0022 |
| 284 ->289         | 0.32601   |           |           |          |
| 284 ->290         | 0.18770   |           |           |          |
| 284 ->291         | 0.27656   |           |           |          |
| 284 ->292         | 0.41180   |           |           |          |
| 285 ->292         | -0.10960  |           |           |          |
| Excited State 38: | Singlet-A | 3.0341 eV | 408.64 nm | f=0.0036 |
| 280 ->286         | 0.15462   |           |           |          |
| 280 ->287         | -0.16307  |           |           |          |
| 281 ->286         | -0.19126  |           |           |          |
| 282 ->288         | 0.12738   |           |           |          |
| 282 ->289         | 0.17860   |           |           |          |
| 282 ->290         | 0.24033   |           |           |          |

|                   |           |           |           |          |
|-------------------|-----------|-----------|-----------|----------|
| 282 ->291         | -0.22225  |           |           |          |
| 285 ->290         | -0.14379  |           |           |          |
| 285 ->292         | -0.16489  |           |           |          |
| Excited State 39: | Singlet-A | 3.0360 eV | 408.38 nm | f=0.0005 |
| 274 ->287         | 0.10702   |           |           |          |
| 278 ->286         | 0.33647   |           |           |          |
| 278 ->287         | 0.42177   |           |           |          |
| 278 ->294         | -0.11578  |           |           |          |
| 280 ->286         | 0.15914   |           |           |          |
| 281 ->287         | 0.17422   |           |           |          |
| 281 ->294         | -0.11972  |           |           |          |
| Excited State 40: | Singlet-A | 3.0411 eV | 407.70 nm | f=0.0009 |
| 280 ->286         | -0.14791  |           |           |          |
| 280 ->287         | 0.11587   |           |           |          |
| 280 ->290         | -0.10755  |           |           |          |
| 280 ->291         | 0.10590   |           |           |          |
| 281 ->286         | 0.12143   |           |           |          |
| 281 ->287         | -0.12271  |           |           |          |
| 281 ->290         | 0.11509   |           |           |          |
| 281 ->291         | -0.11066  |           |           |          |
| 282 ->289         | 0.33283   |           |           |          |
| 282 ->290         | 0.18644   |           |           |          |
| 282 ->291         | -0.18981  |           |           |          |
| 282 ->292         | -0.10778  |           |           |          |
| 282 ->293         | -0.10570  |           |           |          |
| 284 ->292         | 0.11756   |           |           |          |
| 285 ->290         | 0.14448   |           |           |          |
| 285 ->292         | 0.14732   |           |           |          |
| Excited State 41: | Singlet-A | 3.0472 eV | 406.88 nm | f=0.0271 |
| 279 ->286         | 0.10858   |           |           |          |
| 279 ->295         | -0.20670  |           |           |          |
| 282 ->286         | -0.15634  |           |           |          |
| 282 ->288         | 0.21913   |           |           |          |
| 282 ->289         | -0.10331  |           |           |          |
| 282 ->297         | -0.17217  |           |           |          |
| 284 ->295         | 0.25819   |           |           |          |
| 285 ->289         | 0.13396   |           |           |          |
| 285 ->290         | 0.11026   |           |           |          |
| 285 ->292         | 0.21571   |           |           |          |
| 285 ->293         | -0.11278  |           |           |          |

|                   |           |           |           |          |
|-------------------|-----------|-----------|-----------|----------|
| Excited State 42: | Singlet-A | 3.0516 eV | 406.29 nm | f=0.0479 |
| 276 ->288         | -0.10792  |           |           |          |
| 277 ->291         | -0.11513  |           |           |          |
| 280 ->288         | -0.11146  |           |           |          |
| 281 ->288         | 0.10151   |           |           |          |
| 282 ->286         | -0.10868  |           |           |          |
| 282 ->289         | -0.13853  |           |           |          |
| 285 ->288         | 0.13388   |           |           |          |
| 285 ->289         | -0.16111  |           |           |          |
| 285 ->291         | -0.21525  |           |           |          |
| 285 ->292         | -0.15151  |           |           |          |
| 285 ->293         | 0.23843   |           |           |          |

|                   |           |           |           |          |
|-------------------|-----------|-----------|-----------|----------|
| Excited State 43: | Singlet-A | 3.0558 eV | 405.74 nm | f=0.0285 |
| 272 ->289         | 0.10247   |           |           |          |
| 276 ->291         | 0.14543   |           |           |          |
| 276 ->292         | 0.12601   |           |           |          |
| 277 ->288         | 0.10601   |           |           |          |
| 277 ->291         | -0.14385  |           |           |          |
| 277 ->292         | -0.12717  |           |           |          |
| 279 ->291         | 0.10364   |           |           |          |
| 279 ->295         | 0.13808   |           |           |          |
| 284 ->295         | -0.17411  |           |           |          |
| 285 ->289         | 0.14446   |           |           |          |
| 285 ->290         | 0.18452   |           |           |          |
| 285 ->292         | 0.24323   |           |           |          |
| 285 ->293         | -0.11288  |           |           |          |

|                   |           |           |           |          |
|-------------------|-----------|-----------|-----------|----------|
| Excited State 44: | Singlet-A | 3.0660 eV | 404.38 nm | f=0.0007 |
| 271 ->286         | -0.10044  |           |           |          |
| 271 ->287         | -0.13856  |           |           |          |
| 274 ->286         | -0.13342  |           |           |          |
| 274 ->287         | -0.19118  |           |           |          |
| 278 ->286         | 0.19585   |           |           |          |
| 278 ->287         | 0.22931   |           |           |          |
| 278 ->294         | -0.10744  |           |           |          |
| 280 ->287         | -0.13942  |           |           |          |
| 281 ->286         | -0.17750  |           |           |          |
| 281 ->287         | -0.15544  |           |           |          |
| 281 ->289         | -0.10844  |           |           |          |
| 281 ->290         | 0.12358   |           |           |          |
| 285 ->292         | 0.10868   |           |           |          |

|                   |           |           |           |          |
|-------------------|-----------|-----------|-----------|----------|
| Excited State 45: | Singlet-A | 3.0669 eV | 404.27 nm | f=0.0099 |
|-------------------|-----------|-----------|-----------|----------|



|                   |           |           |           |          |
|-------------------|-----------|-----------|-----------|----------|
| 279 ->295         | 0.21901   |           |           |          |
| 281 ->288         | 0.13655   |           |           |          |
| 282 ->286         | -0.20565  |           |           |          |
| 282 ->288         | 0.30705   |           |           |          |
| 282 ->290         | 0.17304   |           |           |          |
| 282 ->291         | -0.10657  |           |           |          |
| 283 ->288         | -0.11036  |           |           |          |
| 284 ->295         | -0.20054  |           |           |          |
| 284 ->297         | -0.11368  |           |           |          |
| Excited State 46: | Singlet-A | 3.0718 eV | 403.62 nm | f=0.0284 |
| 278 ->294         | -0.11387  |           |           |          |
| 280 ->294         | 0.21394   |           |           |          |
| 280 ->296         | 0.20356   |           |           |          |
| 281 ->294         | 0.28698   |           |           |          |
| 281 ->296         | 0.24962   |           |           |          |
| 283 ->289         | 0.11201   |           |           |          |
| 283 ->290         | -0.11702  |           |           |          |
| 283 ->293         | 0.15851   |           |           |          |
| 285 ->296         | 0.11449   |           |           |          |
| Excited State 47: | Singlet-A | 3.0769 eV | 402.96 nm | f=0.0145 |
| 276 ->289         | 0.12994   |           |           |          |
| 276 ->293         | 0.14930   |           |           |          |
| 277 ->286         | 0.12739   |           |           |          |
| 280 ->296         | -0.10541  |           |           |          |
| 281 ->287         | -0.14420  |           |           |          |
| 281 ->294         | -0.11572  |           |           |          |
| 281 ->296         | -0.13835  |           |           |          |
| 283 ->289         | 0.10639   |           |           |          |
| 283 ->292         | -0.12545  |           |           |          |
| 283 ->293         | 0.26679   |           |           |          |
| 284 ->286         | 0.13441   |           |           |          |
| 284 ->287         | 0.18954   |           |           |          |
| Excited State 48: | Singlet-A | 3.0804 eV | 402.49 nm | f=0.0024 |
| 277 ->288         | -0.15389  |           |           |          |
| 280 ->288         | 0.14322   |           |           |          |
| 283 ->289         | -0.15216  |           |           |          |
| 283 ->290         | 0.17216   |           |           |          |
| 283 ->293         | -0.13210  |           |           |          |
| 284 ->286         | 0.25683   |           |           |          |
| 284 ->287         | 0.39112   |           |           |          |
| 284 ->288         | 0.18569   |           |           |          |

|                   |           |           |           |          |
|-------------------|-----------|-----------|-----------|----------|
| 284 ->289         | 0.12082   |           |           |          |
| Excited State 49: | Singlet-A | 3.0835 eV | 402.09 nm | f=0.0047 |
| 276 ->286         | -0.14597  |           |           |          |
| 276 ->288         | 0.10871   |           |           |          |
| 276 ->291         | -0.10247  |           |           |          |
| 277 ->286         | -0.12329  |           |           |          |
| 277 ->291         | 0.10974   |           |           |          |
| 280 ->287         | -0.10798  |           |           |          |
| 280 ->288         | -0.10576  |           |           |          |
| 283 ->288         | 0.14362   |           |           |          |
| 283 ->289         | 0.11172   |           |           |          |
| 283 ->290         | -0.16268  |           |           |          |
| 284 ->286         | 0.14895   |           |           |          |
| 284 ->287         | 0.23609   |           |           |          |
| 285 ->288         | 0.13558   |           |           |          |
| 285 ->290         | 0.13694   |           |           |          |
| 285 ->291         | -0.13178  |           |           |          |
| 285 ->293         | 0.12186   |           |           |          |
| Excited State 50: | Singlet-A | 3.0847 eV | 401.93 nm | f=0.0159 |
| 276 ->293         | 0.12483   |           |           |          |
| 280 ->286         | 0.11234   |           |           |          |
| 280 ->288         | 0.15107   |           |           |          |
| 283 ->290         | 0.23835   |           |           |          |
| 283 ->293         | 0.11761   |           |           |          |
| 284 ->287         | -0.14163  |           |           |          |
| 285 ->286         | 0.10210   |           |           |          |
| 285 ->287         | -0.10165  |           |           |          |
| 285 ->288         | 0.22025   |           |           |          |
| 285 ->290         | 0.17771   |           |           |          |
| 285 ->291         | -0.18439  |           |           |          |
| 285 ->293         | 0.19602   |           |           |          |
| Excited State 51: | Singlet-A | 3.0949 eV | 400.61 nm | f=0.0104 |
| 276 ->286         | -0.13489  |           |           |          |
| 276 ->289         | -0.11406  |           |           |          |
| 276 ->293         | -0.10116  |           |           |          |
| 277 ->287         | 0.12893   |           |           |          |
| 277 ->288         | 0.16838   |           |           |          |
| 280 ->290         | -0.17175  |           |           |          |
| 281 ->288         | 0.15265   |           |           |          |
| 283 ->290         | 0.22224   |           |           |          |
| 283 ->291         | 0.28171   |           |           |          |

|                   |           |           |           |          |  |
|-------------------|-----------|-----------|-----------|----------|--|
| 283 ->292         |           | -0.22305  |           |          |  |
| Excited State 52: | Singlet-A | 3.1001 eV | 399.94 nm | f=0.0071 |  |
| 273 ->286         |           | -0.14252  |           |          |  |
| 279 ->286         |           | 0.10016   |           |          |  |
| 282 ->288         |           | 0.17267   |           |          |  |
| 282 ->289         |           | -0.12842  |           |          |  |
| 282 ->295         |           | -0.21455  |           |          |  |
| 282 ->297         |           | 0.17750   |           |          |  |
| 283 ->295         |           | 0.19681   |           |          |  |
| 284 ->287         |           | 0.10507   |           |          |  |
| 284 ->297         |           | 0.24628   |           |          |  |
| Excited State 53: | Singlet-A | 3.1104 eV | 398.61 nm | f=0.0097 |  |
| 272 ->286         |           | -0.12499  |           |          |  |
| 272 ->287         |           | 0.11538   |           |          |  |
| 272 ->288         |           | -0.10251  |           |          |  |
| 273 ->286         |           | 0.17880   |           |          |  |
| 273 ->287         |           | -0.12309  |           |          |  |
| 279 ->289         |           | 0.18810   |           |          |  |
| 279 ->290         |           | 0.12026   |           |          |  |
| 279 ->291         |           | -0.12523  |           |          |  |
| 282 ->292         |           | -0.10456  |           |          |  |
| 282 ->295         |           | -0.15329  |           |          |  |
| 282 ->297         |           | 0.19614   |           |          |  |
| 284 ->287         |           | -0.12245  |           |          |  |
| 284 ->288         |           | 0.16952   |           |          |  |
| 284 ->297         |           | 0.18473   |           |          |  |
| Excited State 54: | Singlet-A | 3.1126 eV | 398.33 nm | f=0.0027 |  |
| 279 ->289         |           | 0.32787   |           |          |  |
| 279 ->290         |           | 0.25828   |           |          |  |
| 279 ->291         |           | -0.27063  |           |          |  |
| 279 ->292         |           | -0.10602  |           |          |  |
| 285 ->289         |           | 0.12464   |           |          |  |
| 285 ->291         |           | -0.15198  |           |          |  |
| 285 ->292         |           | -0.12463  |           |          |  |
| 285 ->293         |           | -0.12641  |           |          |  |
| Excited State 55: | Singlet-A | 3.1154 eV | 397.97 nm | f=0.0066 |  |
| 279 ->289         |           | 0.15459   |           |          |  |
| 279 ->290         |           | 0.12610   |           |          |  |
| 279 ->291         |           | -0.11805  |           |          |  |
| 280 ->289         |           | 0.13509   |           |          |  |

|                   |           |           |           |          |  |
|-------------------|-----------|-----------|-----------|----------|--|
| 280 ->290         | 0.10608   |           |           |          |  |
| 280 ->291         | -0.17622  |           |           |          |  |
| 281 ->289         | -0.10912  |           |           |          |  |
| 281 ->291         | 0.15521   |           |           |          |  |
| 282 ->291         | -0.10828  |           |           |          |  |
| 285 ->289         | -0.18540  |           |           |          |  |
| 285 ->291         | 0.21417   |           |           |          |  |
| 285 ->292         | 0.19284   |           |           |          |  |
| 285 ->293         | 0.19488   |           |           |          |  |
| Excited State 56: | Singlet-A | 3.1195 eV | 397.45 nm | f=0.0074 |  |
| 278 ->287         | -0.11215  |           |           |          |  |
| 278 ->288         | -0.31012  |           |           |          |  |
| 278 ->289         | -0.21921  |           |           |          |  |
| 278 ->290         | 0.44736   |           |           |          |  |
| 278 ->291         | 0.19692   |           |           |          |  |
| 278 ->292         | -0.14573  |           |           |          |  |
| Excited State 57: | Singlet-A | 3.1213 eV | 397.21 nm | f=0.0059 |  |
| 269 ->287         | 0.14132   |           |           |          |  |
| 273 ->287         | 0.10603   |           |           |          |  |
| 276 ->286         | 0.19848   |           |           |          |  |
| 276 ->289         | -0.11915  |           |           |          |  |
| 276 ->293         | -0.17122  |           |           |          |  |
| 277 ->286         | 0.30060   |           |           |          |  |
| 277 ->287         | 0.13762   |           |           |          |  |
| 280 ->290         | 0.18168   |           |           |          |  |
| 281 ->289         | 0.12409   |           |           |          |  |
| 281 ->290         | -0.11924  |           |           |          |  |
| 281 ->292         | -0.10875  |           |           |          |  |
| Excited State 58: | Singlet-A | 3.1299 eV | 396.13 nm | f=0.0019 |  |
| 269 ->286         | 0.11952   |           |           |          |  |
| 276 ->287         | 0.26981   |           |           |          |  |
| 277 ->287         | 0.26411   |           |           |          |  |
| 277 ->290         | 0.10912   |           |           |          |  |
| 280 ->291         | 0.15519   |           |           |          |  |
| 280 ->293         | -0.11087  |           |           |          |  |
| 281 ->286         | -0.12155  |           |           |          |  |
| 281 ->288         | 0.17626   |           |           |          |  |
| 281 ->293         | 0.11012   |           |           |          |  |
| 283 ->292         | 0.10052   |           |           |          |  |
| 285 ->291         | 0.10931   |           |           |          |  |

|                   |           |           |           |          |
|-------------------|-----------|-----------|-----------|----------|
| Excited State 59: | Singlet-A | 3.1338 eV | 395.64 nm | f=0.0004 |
| 284 ->286         | 0.10823   |           |           |          |
| 284 ->287         | 0.17255   |           |           |          |
| 284 ->288         | -0.30486  |           |           |          |
| 284 ->289         | -0.26403  |           |           |          |
| 284 ->290         | 0.36058   |           |           |          |
| 284 ->291         | -0.19806  |           |           |          |
| 284 ->292         | 0.25468   |           |           |          |

|                   |           |           |           |          |
|-------------------|-----------|-----------|-----------|----------|
| Excited State 60: | Singlet-A | 3.1409 eV | 394.75 nm | f=0.0001 |
| 275 ->286         | -0.14227  |           |           |          |
| 275 ->288         | 0.10123   |           |           |          |
| 277 ->287         | -0.12048  |           |           |          |
| 280 ->286         | -0.17740  |           |           |          |
| 280 ->288         | 0.25472   |           |           |          |
| 280 ->289         | 0.10507   |           |           |          |
| 280 ->290         | 0.10638   |           |           |          |
| 280 ->292         | -0.11679  |           |           |          |
| 281 ->286         | -0.13678  |           |           |          |
| 281 ->287         | 0.13646   |           |           |          |
| 281 ->288         | 0.25417   |           |           |          |
| 281 ->291         | 0.18396   |           |           |          |
| 285 ->291         | -0.13817  |           |           |          |

|                   |           |           |           |          |
|-------------------|-----------|-----------|-----------|----------|
| Excited State 61: | Singlet-A | 3.1419 eV | 394.62 nm | f=0.0020 |
| 280 ->292         | -0.11295  |           |           |          |
| 281 ->291         | 0.10748   |           |           |          |
| 281 ->292         | 0.13576   |           |           |          |
| 282 ->289         | 0.20332   |           |           |          |
| 282 ->290         | 0.11834   |           |           |          |
| 282 ->291         | 0.30544   |           |           |          |
| 282 ->292         | 0.40049   |           |           |          |
| 283 ->292         | -0.12848  |           |           |          |

|                   |           |           |           |          |
|-------------------|-----------|-----------|-----------|----------|
| Excited State 62: | Singlet-A | 3.1462 eV | 394.07 nm | f=0.0007 |
| 275 ->286         | 0.15783   |           |           |          |
| 277 ->286         | -0.10708  |           |           |          |
| 280 ->288         | 0.19128   |           |           |          |
| 280 ->291         | 0.23567   |           |           |          |
| 280 ->292         | -0.12998  |           |           |          |
| 281 ->286         | 0.10500   |           |           |          |
| 281 ->288         | 0.15262   |           |           |          |
| 281 ->289         | 0.23816   |           |           |          |
| 281 ->290         | 0.10709   |           |           |          |

|           |          |
|-----------|----------|
| 281 ->291 | 0.16506  |
| 281 ->292 | -0.15463 |
| 282 ->289 | -0.10327 |
| 285 ->289 | -0.10339 |
| 285 ->291 | 0.10743  |
| 285 ->292 | 0.11656  |
| 285 ->293 | 0.10526  |

Excited State 63: Singlet-A 3.1538 eV 393.12 nm f=0.0019

|           |          |
|-----------|----------|
| 275 ->286 | 0.11291  |
| 280 ->286 | 0.15752  |
| 280 ->289 | 0.19213  |
| 280 ->291 | -0.12108 |
| 280 ->292 | -0.20175 |
| 281 ->286 | 0.15844  |
| 281 ->287 | -0.12021 |
| 281 ->291 | 0.22335  |
| 283 ->291 | -0.10249 |
| 285 ->289 | 0.12103  |
| 285 ->290 | 0.10444  |
| 285 ->291 | -0.19130 |
| 285 ->292 | -0.14038 |
| 285 ->293 | -0.13685 |

Excited State 64: Singlet-A 3.1647 eV 391.77 nm f=0.0065

|           |          |
|-----------|----------|
| 271 ->287 | -0.11667 |
| 271 ->288 | -0.13482 |
| 271 ->289 | -0.10311 |
| 271 ->290 | 0.24730  |
| 271 ->291 | 0.13798  |
| 271 ->292 | -0.11482 |
| 274 ->286 | 0.14945  |
| 274 ->287 | 0.18939  |
| 274 ->288 | -0.11638 |
| 274 ->289 | -0.11249 |
| 274 ->290 | 0.21280  |
| 275 ->286 | -0.10343 |
| 275 ->288 | 0.10386  |
| 280 ->286 | 0.10483  |
| 280 ->291 | 0.10397  |
| 281 ->286 | 0.12146  |
| 281 ->290 | 0.11470  |

Excited State 65: Singlet-A 3.1724 eV 390.82 nm f=0.0014

|           |          |
|-----------|----------|
| 279 ->286 | -0.26424 |
| 279 ->288 | 0.41355  |
| 279 ->289 | -0.16830 |
| 279 ->290 | 0.17295  |
| 280 ->286 | -0.11000 |
| 280 ->287 | 0.11615  |
| 281 ->286 | -0.13836 |
| 281 ->287 | 0.11090  |

Excited State 66: Singlet-A 3.1784 eV 390.09 nm f=0.0039

|           |          |
|-----------|----------|
| 275 ->286 | -0.18244 |
| 275 ->288 | 0.17295  |
| 275 ->289 | -0.10024 |
| 277 ->293 | 0.13143  |
| 279 ->286 | -0.12757 |
| 279 ->288 | 0.19349  |
| 280 ->286 | 0.17108  |
| 280 ->287 | -0.17255 |
| 281 ->286 | 0.18749  |
| 281 ->287 | -0.15052 |
| 283 ->293 | 0.16159  |

Excited State 67: Singlet-A 3.1878 eV 388.93 nm f=0.0060

|           |          |
|-----------|----------|
| 275 ->287 | 0.12263  |
| 275 ->293 | 0.18686  |
| 276 ->286 | 0.14344  |
| 276 ->287 | 0.10452  |
| 277 ->286 | 0.11274  |
| 277 ->288 | 0.23533  |
| 277 ->289 | -0.10344 |
| 277 ->290 | -0.10634 |
| 277 ->293 | -0.17369 |
| 280 ->289 | 0.13595  |
| 281 ->292 | -0.10994 |
| 282 ->287 | 0.14065  |
| 283 ->293 | -0.21613 |

Excited State 68: Singlet-A 3.1932 eV 388.27 nm f=0.0002

|           |          |
|-----------|----------|
| 282 ->286 | 0.15595  |
| 282 ->287 | 0.24356  |
| 284 ->290 | 0.33495  |
| 284 ->291 | 0.34146  |
| 284 ->292 | -0.31777 |

|                   |           |           |           |          |
|-------------------|-----------|-----------|-----------|----------|
| Excited State 69: | Singlet-A | 3.1936 eV | 388.22 nm | f=0.0003 |
| 280 ->287         | -0.11106  |           |           |          |
| 281 ->287         | 0.14264   |           |           |          |
| 282 ->286         | 0.24916   |           |           |          |
| 282 ->287         | 0.40810   |           |           |          |
| 282 ->288         | 0.13317   |           |           |          |
| 283 ->287         | -0.11389  |           |           |          |
| 284 ->290         | -0.20569  |           |           |          |
| 284 ->291         | -0.21949  |           |           |          |
| 284 ->292         | 0.20849   |           |           |          |

|                   |           |           |           |          |
|-------------------|-----------|-----------|-----------|----------|
| Excited State 70: | Singlet-A | 3.1996 eV | 387.49 nm | f=0.0022 |
| 275 ->286         | -0.10588  |           |           |          |
| 276 ->289         | 0.10624   |           |           |          |
| 277 ->287         | -0.10912  |           |           |          |
| 277 ->290         | 0.14025   |           |           |          |
| 280 ->287         | 0.12908   |           |           |          |
| 280 ->288         | -0.13653  |           |           |          |
| 280 ->289         | 0.18052   |           |           |          |
| 280 ->293         | 0.21443   |           |           |          |
| 281 ->286         | -0.11975  |           |           |          |
| 281 ->287         | 0.11697   |           |           |          |
| 281 ->288         | -0.14489  |           |           |          |
| 281 ->289         | 0.30445   |           |           |          |
| 281 ->292         | 0.10409   |           |           |          |
| 281 ->293         | 0.22481   |           |           |          |

|                   |           |           |           |          |
|-------------------|-----------|-----------|-----------|----------|
| Excited State 71: | Singlet-A | 3.2106 eV | 386.17 nm | f=0.0069 |
| 275 ->293         | 0.11526   |           |           |          |
| 276 ->290         | 0.16500   |           |           |          |
| 276 ->291         | 0.11539   |           |           |          |
| 277 ->287         | -0.18324  |           |           |          |
| 277 ->290         | 0.23365   |           |           |          |
| 277 ->291         | 0.16167   |           |           |          |
| 277 ->293         | -0.11152  |           |           |          |
| 280 ->286         | 0.11688   |           |           |          |
| 280 ->289         | -0.19130  |           |           |          |
| 280 ->293         | -0.11833  |           |           |          |
| 281 ->288         | 0.12387   |           |           |          |
| 281 ->289         | -0.11387  |           |           |          |
| 281 ->290         | -0.10200  |           |           |          |
| 281 ->293         | -0.12657  |           |           |          |

|                   |           |           |           |          |
|-------------------|-----------|-----------|-----------|----------|
| Excited State 72: | Singlet-A | 3.2231 eV | 384.67 nm | f=0.0038 |
|-------------------|-----------|-----------|-----------|----------|



|                   |           |           |           |          |  |
|-------------------|-----------|-----------|-----------|----------|--|
| 269 ->290         | -0.12489  |           |           |          |  |
| 275 ->286         | -0.12704  |           |           |          |  |
| 276 ->289         | 0.20600   |           |           |          |  |
| 276 ->292         | 0.22970   |           |           |          |  |
| 277 ->287         | 0.11241   |           |           |          |  |
| 277 ->289         | 0.16578   |           |           |          |  |
| 277 ->292         | 0.28203   |           |           |          |  |
| 277 ->293         | -0.10783  |           |           |          |  |
| 280 ->289         | -0.10098  |           |           |          |  |
| 280 ->291         | -0.10253  |           |           |          |  |
| 282 ->290         | -0.10136  |           |           |          |  |
| Excited State 73: | Singlet-A | 3.2291 eV | 383.95 nm | f=0.0024 |  |
| 276 ->287         | -0.11468  |           |           |          |  |
| 284 ->289         | 0.14646   |           |           |          |  |
| 284 ->293         | 0.61740   |           |           |          |  |
| Excited State 74: | Singlet-A | 3.2352 eV | 383.24 nm | f=0.0131 |  |
| 271 ->286         | 0.10477   |           |           |          |  |
| 271 ->287         | 0.13543   |           |           |          |  |
| 276 ->286         | 0.15017   |           |           |          |  |
| 276 ->287         | 0.20121   |           |           |          |  |
| 279 ->287         | 0.11918   |           |           |          |  |
| 279 ->291         | -0.13049  |           |           |          |  |
| 279 ->292         | -0.16696  |           |           |          |  |
| 279 ->295         | 0.11686   |           |           |          |  |
| 279 ->297         | 0.29627   |           |           |          |  |
| 284 ->293         | 0.12038   |           |           |          |  |
| Excited State 75: | Singlet-A | 3.2365 eV | 383.09 nm | f=0.0174 |  |
| 273 ->289         | -0.12057  |           |           |          |  |
| 276 ->286         | -0.14839  |           |           |          |  |
| 276 ->287         | -0.15339  |           |           |          |  |
| 276 ->288         | -0.11309  |           |           |          |  |
| 279 ->291         | -0.10735  |           |           |          |  |
| 279 ->295         | 0.12163   |           |           |          |  |
| 279 ->297         | 0.34410   |           |           |          |  |
| 282 ->297         | -0.10029  |           |           |          |  |
| 283 ->295         | -0.10919  |           |           |          |  |
| 284 ->293         | -0.17271  |           |           |          |  |
| 284 ->297         | 0.10056   |           |           |          |  |
| Excited State 76: | Singlet-A | 3.2413 eV | 382.52 nm | f=0.0505 |  |
| 271 ->286         | 0.10700   |           |           |          |  |

|                   |           |           |           |          |  |
|-------------------|-----------|-----------|-----------|----------|--|
| 271 ->287         | 0.14555   |           |           |          |  |
| 272 ->286         | -0.10224  |           |           |          |  |
| 273 ->287         | -0.10561  |           |           |          |  |
| 273 ->289         | -0.10453  |           |           |          |  |
| 276 ->288         | -0.12093  |           |           |          |  |
| 277 ->287         | 0.12804   |           |           |          |  |
| 278 ->296         | 0.37173   |           |           |          |  |
| 279 ->297         | -0.11551  |           |           |          |  |
| Excited State 77: | Singlet-A | 3.2432 eV | 382.29 nm | f=0.0048 |  |
| 271 ->287         | 0.10077   |           |           |          |  |
| 272 ->287         | -0.11951  |           |           |          |  |
| 272 ->289         | -0.13038  |           |           |          |  |
| 273 ->288         | -0.10057  |           |           |          |  |
| 273 ->289         | 0.13944   |           |           |          |  |
| 275 ->289         | 0.13167   |           |           |          |  |
| 276 ->287         | -0.11186  |           |           |          |  |
| 276 ->289         | -0.11498  |           |           |          |  |
| 277 ->286         | 0.12549   |           |           |          |  |
| 277 ->290         | 0.11271   |           |           |          |  |
| 278 ->288         | 0.23219   |           |           |          |  |
| 278 ->291         | 0.16062   |           |           |          |  |
| 278 ->292         | -0.11826  |           |           |          |  |
| Excited State 78: | Singlet-A | 3.2454 eV | 382.03 nm | f=0.0099 |  |
| 273 ->289         | 0.11840   |           |           |          |  |
| 276 ->288         | 0.12328   |           |           |          |  |
| 278 ->286         | 0.12868   |           |           |          |  |
| 278 ->296         | 0.38801   |           |           |          |  |
| 282 ->290         | -0.12513  |           |           |          |  |
| Excited State 79: | Singlet-A | 3.2487 eV | 381.65 nm | f=0.0008 |  |
| 271 ->287         | -0.11831  |           |           |          |  |
| 277 ->290         | -0.11570  |           |           |          |  |
| 278 ->296         | 0.17071   |           |           |          |  |
| 279 ->292         | -0.15178  |           |           |          |  |
| 281 ->289         | -0.11489  |           |           |          |  |
| 282 ->288         | -0.24730  |           |           |          |  |
| 282 ->289         | -0.22675  |           |           |          |  |
| 282 ->290         | 0.26063   |           |           |          |  |
| 282 ->291         | -0.13593  |           |           |          |  |
| 282 ->292         | 0.15725   |           |           |          |  |
| Excited State 80: | Singlet-A | 3.2505 eV | 381.43 nm | f=0.0033 |  |

|           |          |
|-----------|----------|
| 275 ->289 | -0.14489 |
| 276 ->287 | 0.10767  |
| 277 ->287 | -0.12216 |
| 278 ->286 | -0.15784 |
| 278 ->287 | 0.14809  |
| 278 ->288 | 0.32025  |
| 278 ->290 | 0.12680  |
| 278 ->291 | 0.18666  |
| 278 ->292 | -0.12785 |
| 279 ->289 | 0.10813  |
| 279 ->291 | 0.13411  |
| 279 ->292 | 0.16267  |
| 279 ->297 | 0.12159  |
| 281 ->292 | -0.10235 |

Excited State 81: Singlet-A 3.2529 eV 381.15 nm f=0.0029

|           |          |
|-----------|----------|
| 278 ->288 | -0.17302 |
| 278 ->291 | -0.10883 |
| 279 ->286 | -0.11712 |
| 279 ->287 | -0.14620 |
| 279 ->289 | 0.18232  |
| 279 ->291 | 0.20601  |
| 279 ->292 | 0.27380  |
| 279 ->297 | 0.16930  |
| 282 ->288 | -0.15066 |
| 282 ->289 | -0.11500 |
| 282 ->290 | 0.18510  |
| 282 ->292 | 0.14709  |

Excited State 82: Singlet-A 3.2612 eV 380.18 nm f=0.0022

|           |          |
|-----------|----------|
| 275 ->289 | 0.10947  |
| 275 ->290 | 0.14215  |
| 275 ->292 | 0.14420  |
| 276 ->290 | -0.11600 |
| 276 ->292 | -0.11537 |
| 277 ->286 | -0.13243 |
| 277 ->288 | -0.11870 |
| 277 ->290 | -0.11808 |
| 278 ->286 | -0.17057 |
| 278 ->287 | 0.13024  |
| 279 ->289 | 0.13037  |
| 279 ->291 | 0.12831  |
| 279 ->292 | 0.16034  |
| 280 ->290 | 0.14739  |

|                   |           |           |           |          |  |
|-------------------|-----------|-----------|-----------|----------|--|
| 280 ->292         | 0.19459   |           |           |          |  |
| 281 ->290         | 0.10927   |           |           |          |  |
| 281 ->292         | 0.17986   |           |           |          |  |
| Excited State 83: | Singlet-A | 3.2627 eV | 380.01 nm | f=0.0024 |  |
| 278 ->286         | 0.39086   |           |           |          |  |
| 278 ->287         | -0.26404  |           |           |          |  |
| 278 ->289         | 0.22366   |           |           |          |  |
| 278 ->291         | 0.25300   |           |           |          |  |
| 278 ->292         | -0.20637  |           |           |          |  |
| 278 ->296         | -0.13202  |           |           |          |  |
| Excited State 84: | Singlet-A | 3.2684 eV | 379.34 nm | f=0.0091 |  |
| 271 ->290         | -0.10469  |           |           |          |  |
| 272 ->289         | 0.13760   |           |           |          |  |
| 273 ->291         | 0.12743   |           |           |          |  |
| 276 ->288         | 0.14427   |           |           |          |  |
| 276 ->291         | -0.10955  |           |           |          |  |
| 277 ->286         | 0.14444   |           |           |          |  |
| 277 ->287         | -0.15190  |           |           |          |  |
| 277 ->288         | 0.15335   |           |           |          |  |
| 277 ->289         | -0.15303  |           |           |          |  |
| 277 ->290         | 0.14763   |           |           |          |  |
| 277 ->291         | -0.10980  |           |           |          |  |
| 277 ->293         | 0.14159   |           |           |          |  |
| 280 ->292         | 0.12138   |           |           |          |  |
| 280 ->293         | -0.14606  |           |           |          |  |
| 281 ->292         | 0.16429   |           |           |          |  |
| 281 ->293         | -0.12317  |           |           |          |  |
| Excited State 85: | Singlet-A | 3.2765 eV | 378.40 nm | f=0.0060 |  |
| 271 ->288         | -0.13475  |           |           |          |  |
| 271 ->289         | -0.10049  |           |           |          |  |
| 271 ->290         | 0.20711   |           |           |          |  |
| 271 ->291         | 0.10076   |           |           |          |  |
| 274 ->288         | 0.16910   |           |           |          |  |
| 274 ->290         | -0.18155  |           |           |          |  |
| 275 ->287         | 0.10197   |           |           |          |  |
| 275 ->291         | 0.10583   |           |           |          |  |
| 277 ->288         | 0.16779   |           |           |          |  |
| 277 ->290         | -0.17450  |           |           |          |  |
| 279 ->290         | 0.10697   |           |           |          |  |
| 285 ->290         | 0.10358   |           |           |          |  |

|                   |           |           |           |          |
|-------------------|-----------|-----------|-----------|----------|
| Excited State 86: | Singlet-A | 3.2782 eV | 378.21 nm | f=0.0007 |
| 271 ->286         | -0.11920  |           |           |          |
| 271 ->287         | -0.12250  |           |           |          |
| 271 ->290         | -0.14408  |           |           |          |
| 275 ->286         | 0.10476   |           |           |          |
| 275 ->287         | 0.19723   |           |           |          |
| 276 ->287         | 0.10254   |           |           |          |
| 276 ->288         | -0.18919  |           |           |          |
| 276 ->289         | -0.11640  |           |           |          |
| 276 ->291         | -0.10071  |           |           |          |
| 276 ->292         | 0.15250   |           |           |          |
| 277 ->289         | 0.10443   |           |           |          |
| 279 ->288         | -0.10041  |           |           |          |
| 280 ->290         | 0.11155   |           |           |          |

|                   |           |           |           |          |
|-------------------|-----------|-----------|-----------|----------|
| Excited State 87: | Singlet-A | 3.2820 eV | 377.77 nm | f=0.0011 |
| 271 ->290         | 0.11201   |           |           |          |
| 274 ->290         | -0.15280  |           |           |          |
| 275 ->286         | 0.16377   |           |           |          |
| 275 ->289         | -0.11681  |           |           |          |
| 275 ->292         | -0.14402  |           |           |          |
| 276 ->286         | 0.11464   |           |           |          |
| 276 ->287         | -0.17338  |           |           |          |
| 280 ->292         | 0.16086   |           |           |          |
| 281 ->288         | 0.14621   |           |           |          |
| 281 ->290         | 0.16489   |           |           |          |
| 281 ->291         | -0.10217  |           |           |          |
| 281 ->292         | 0.18811   |           |           |          |

|                   |           |           |           |          |
|-------------------|-----------|-----------|-----------|----------|
| Excited State 88: | Singlet-A | 3.2884 eV | 377.03 nm | f=0.0025 |
| 269 ->287         | 0.12447   |           |           |          |
| 271 ->286         | 0.13494   |           |           |          |
| 271 ->287         | 0.17779   |           |           |          |
| 272 ->286         | 0.10792   |           |           |          |
| 272 ->288         | -0.11447  |           |           |          |
| 273 ->286         | 0.10146   |           |           |          |
| 273 ->288         | -0.14869  |           |           |          |
| 274 ->290         | 0.13146   |           |           |          |
| 275 ->286         | -0.11555  |           |           |          |
| 276 ->286         | -0.12234  |           |           |          |
| 276 ->290         | -0.11290  |           |           |          |
| 276 ->291         | -0.10279  |           |           |          |
| 279 ->287         | 0.15896   |           |           |          |
| 280 ->290         | 0.16525   |           |           |          |

|                   |           |           |           |          |
|-------------------|-----------|-----------|-----------|----------|
| 281 ->290         | 0.15282   |           |           |          |
| Excited State 89: | Singlet-A | 3.2931 eV | 376.50 nm | f=0.0014 |
| 275 ->289         | -0.10013  |           |           |          |
| 280 ->288         | -0.13549  |           |           |          |
| 280 ->291         | 0.19539   |           |           |          |
| 280 ->292         | 0.10173   |           |           |          |
| 280 ->293         | -0.21962  |           |           |          |
| 281 ->288         | -0.15503  |           |           |          |
| 281 ->290         | -0.10411  |           |           |          |
| 281 ->291         | 0.24013   |           |           |          |
| 281 ->293         | -0.22885  |           |           |          |
| Excited State 90: | Singlet-A | 3.2950 eV | 376.28 nm | f=0.0018 |
| 275 ->292         | -0.10063  |           |           |          |
| 277 ->286         | 0.11213   |           |           |          |
| 277 ->287         | 0.19178   |           |           |          |
| 279 ->286         | 0.25786   |           |           |          |
| 279 ->287         | 0.42421   |           |           |          |
| 279 ->288         | 0.15991   |           |           |          |
| Excited State 91: | Singlet-A | 3.3025 eV | 375.42 nm | f=0.0015 |
| 276 ->287         | -0.11767  |           |           |          |
| 281 ->291         | 0.11205   |           |           |          |
| 281 ->292         | -0.12527  |           |           |          |
| 282 ->290         | 0.26782   |           |           |          |
| 282 ->291         | 0.31403   |           |           |          |
| 282 ->292         | -0.30748  |           |           |          |
| 283 ->291         | -0.11878  |           |           |          |
| Excited State 92: | Singlet-A | 3.3055 eV | 375.09 nm | f=0.0023 |
| 272 ->286         | 0.11827   |           |           |          |
| 273 ->290         | -0.11462  |           |           |          |
| 275 ->286         | -0.17501  |           |           |          |
| 275 ->289         | -0.14448  |           |           |          |
| 276 ->287         | 0.20475   |           |           |          |
| 278 ->289         | 0.12978   |           |           |          |
| 279 ->287         | -0.12443  |           |           |          |
| 280 ->291         | -0.10322  |           |           |          |
| 280 ->292         | 0.13358   |           |           |          |
| 282 ->290         | 0.16752   |           |           |          |
| 282 ->291         | 0.20858   |           |           |          |
| 282 ->292         | -0.17311  |           |           |          |

Excited State 93: Singlet-A 3.3097 eV 374.61 nm f=0.0003  
277 ->289 0.11676  
278 ->286 -0.17338  
278 ->287 0.15989  
278 ->288 -0.21504  
278 ->289 0.41934  
278 ->293 0.30931

Excited State 94: Singlet-A 3.3115 eV 374.40 nm f=0.0004  
275 ->291 0.15151  
275 ->292 0.13993  
276 ->290 0.13722  
276 ->291 -0.16794  
276 ->292 -0.13481  
277 ->289 0.16139  
277 ->290 0.11229  
277 ->291 -0.16394  
277 ->292 -0.16195  
277 ->293 -0.10602  
278 ->289 -0.14543  
278 ->293 -0.10309  
281 ->293 0.11652  
283 ->295 0.19324

Excited State 95: Singlet-A 3.3147 eV 374.05 nm f=0.0132  
273 ->295 -0.10162  
277 ->289 -0.10609  
277 ->295 0.10209  
279 ->295 0.13443  
280 ->295 -0.17701  
281 ->295 0.13447  
282 ->295 0.19720  
283 ->295 0.47770

Excited State 96: Singlet-A 3.3309 eV 372.22 nm f=0.0028  
270 ->286 -0.12980  
272 ->286 0.16113  
274 ->290 0.11735  
275 ->290 0.16594  
276 ->289 -0.16959  
276 ->290 0.32361  
276 ->291 0.14359  
277 ->290 -0.15022  
279 ->288 -0.12825

|                    |           |           |           |          |  |
|--------------------|-----------|-----------|-----------|----------|--|
| 279 ->289          | -0.12502  |           |           |          |  |
| 279 ->290          | 0.20973   |           |           |          |  |
| Excited State 97:  | Singlet-A | 3.3354 eV | 371.72 nm | f=0.0016 |  |
| 270 ->286          | -0.11139  |           |           |          |  |
| 272 ->287          | -0.13302  |           |           |          |  |
| 275 ->288          | 0.18104   |           |           |          |  |
| 275 ->291          | -0.10069  |           |           |          |  |
| 276 ->288          | 0.21886   |           |           |          |  |
| 276 ->290          | -0.14893  |           |           |          |  |
| 276 ->291          | -0.17691  |           |           |          |  |
| 276 ->292          | 0.23991   |           |           |          |  |
| 277 ->291          | 0.18010   |           |           |          |  |
| Excited State 98:  | Singlet-A | 3.3436 eV | 370.81 nm | f=0.0019 |  |
| 270 ->286          | 0.16441   |           |           |          |  |
| 270 ->288          | 0.13405   |           |           |          |  |
| 272 ->290          | -0.12156  |           |           |          |  |
| 273 ->288          | 0.16511   |           |           |          |  |
| 273 ->289          | 0.17086   |           |           |          |  |
| 273 ->292          | -0.13057  |           |           |          |  |
| 275 ->288          | 0.20986   |           |           |          |  |
| 275 ->292          | -0.11103  |           |           |          |  |
| 277 ->290          | 0.14492   |           |           |          |  |
| 277 ->292          | -0.13792  |           |           |          |  |
| 279 ->291          | -0.10553  |           |           |          |  |
| 279 ->292          | 0.11837   |           |           |          |  |
| Excited State 99:  | Singlet-A | 3.3452 eV | 370.64 nm | f=0.0006 |  |
| 276 ->292          | 0.11576   |           |           |          |  |
| 277 ->289          | -0.10459  |           |           |          |  |
| 277 ->291          | 0.11700   |           |           |          |  |
| 280 ->289          | -0.15561  |           |           |          |  |
| 280 ->290          | -0.10205  |           |           |          |  |
| 280 ->291          | 0.22602   |           |           |          |  |
| 280 ->292          | 0.17267   |           |           |          |  |
| 280 ->293          | 0.18772   |           |           |          |  |
| 281 ->289          | -0.19420  |           |           |          |  |
| 281 ->290          | -0.11703  |           |           |          |  |
| 281 ->291          | 0.27633   |           |           |          |  |
| 281 ->292          | 0.21654   |           |           |          |  |
| 281 ->293          | 0.23751   |           |           |          |  |
| Excited State 100: | Singlet-A | 3.3506 eV | 370.04 nm | f=0.0007 |  |



|                    |           |           |           |          |
|--------------------|-----------|-----------|-----------|----------|
| 275 ->287          | 0.13978   |           |           |          |
| 275 ->290          | 0.10874   |           |           |          |
| 276 ->289          | -0.12829  |           |           |          |
| 276 ->290          | 0.16217   |           |           |          |
| 277 ->288          | 0.10013   |           |           |          |
| 277 ->289          | 0.10396   |           |           |          |
| 279 ->287          | -0.10067  |           |           |          |
| 279 ->288          | 0.28048   |           |           |          |
| 279 ->289          | 0.22305   |           |           |          |
| 279 ->290          | -0.27219  |           |           |          |
| 279 ->291          | 0.15431   |           |           |          |
| 279 ->292          | -0.21702  |           |           |          |
| Excited State 101: | Singlet-A | 3.3529 eV | 369.78 nm | f=0.0002 |
| 280 ->293          | -0.15610  |           |           |          |
| 281 ->293          | 0.15087   |           |           |          |
| 282 ->289          | 0.12806   |           |           |          |
| 282 ->293          | 0.57719   |           |           |          |
| 283 ->293          | -0.16890  |           |           |          |
| Excited State 102: | Singlet-A | 3.3568 eV | 369.35 nm | f=0.0014 |
| 268 ->286          | -0.12988  |           |           |          |
| 273 ->291          | 0.10981   |           |           |          |
| 275 ->287          | 0.19000   |           |           |          |
| 275 ->288          | -0.17631  |           |           |          |
| 275 ->290          | -0.10212  |           |           |          |
| 276 ->286          | -0.11980  |           |           |          |
| 276 ->290          | -0.10668  |           |           |          |
| 276 ->291          | 0.14518   |           |           |          |
| 276 ->293          | -0.11315  |           |           |          |
| 277 ->293          | 0.11529   |           |           |          |
| 280 ->294          | 0.19419   |           |           |          |
| 281 ->294          | -0.15336  |           |           |          |
| 282 ->293          | 0.15477   |           |           |          |
| 282 ->294          | 0.15954   |           |           |          |
| 283 ->294          | 0.17822   |           |           |          |
| Excited State 103: | Singlet-A | 3.3581 eV | 369.21 nm | f=0.0019 |
| 268 ->289          | -0.21773  |           |           |          |
| 268 ->290          | -0.10789  |           |           |          |
| 270 ->286          | 0.10272   |           |           |          |
| 270 ->289          | -0.11042  |           |           |          |
| 270 ->290          | -0.15518  |           |           |          |
| 270 ->291          | 0.23449   |           |           |          |

|                    |           |           |           |          |
|--------------------|-----------|-----------|-----------|----------|
| 270 ->292          | 0.11831   |           |           |          |
| 272 ->289          | 0.12680   |           |           |          |
| 272 ->290          | 0.13843   |           |           |          |
| 275 ->288          | 0.10192   |           |           |          |
| 276 ->293          | 0.13031   |           |           |          |
| 277 ->289          | -0.14602  |           |           |          |
| 277 ->290          | -0.11125  |           |           |          |
| 277 ->291          | 0.17412   |           |           |          |
| 277 ->292          | 0.10776   |           |           |          |
| Excited State 104: | Singlet-A | 3.3599 eV | 369.02 nm | f=0.0022 |
| 268 ->286          | 0.10214   |           |           |          |
| 270 ->287          | -0.11024  |           |           |          |
| 275 ->287          | -0.17061  |           |           |          |
| 280 ->294          | 0.31339   |           |           |          |
| 281 ->294          | -0.23605  |           |           |          |
| 282 ->294          | 0.24491   |           |           |          |
| 283 ->294          | 0.28142   |           |           |          |
| Excited State 105: | Singlet-A | 3.3653 eV | 368.42 nm | f=0.0052 |
| 268 ->288          | -0.12208  |           |           |          |
| 268 ->291          | 0.10198   |           |           |          |
| 269 ->290          | -0.10911  |           |           |          |
| 270 ->286          | -0.18541  |           |           |          |
| 270 ->287          | 0.12654   |           |           |          |
| 272 ->291          | -0.13519  |           |           |          |
| 275 ->288          | -0.12069  |           |           |          |
| 275 ->289          | 0.16860   |           |           |          |
| 275 ->291          | 0.11995   |           |           |          |
| 277 ->291          | 0.16682   |           |           |          |
| 278 ->290          | 0.10082   |           |           |          |
| 278 ->292          | 0.20188   |           |           |          |
| 278 ->293          | -0.11237  |           |           |          |
| Excited State 106: | Singlet-A | 3.3686 eV | 368.06 nm | f=0.0016 |
| 278 ->287          | -0.12554  |           |           |          |
| 278 ->288          | 0.14667   |           |           |          |
| 278 ->289          | 0.14807   |           |           |          |
| 278 ->290          | 0.29196   |           |           |          |
| 278 ->292          | 0.45675   |           |           |          |
| 278 ->293          | -0.15762  |           |           |          |
| Excited State 107: | Singlet-A | 3.3782 eV | 367.01 nm | f=0.0027 |
| 268 ->286          | 0.14502   |           |           |          |

|                    |           |           |           |          |
|--------------------|-----------|-----------|-----------|----------|
| 269 ->287          | -0.11077  |           |           |          |
| 269 ->290          | 0.10953   |           |           |          |
| 270 ->288          | 0.19835   |           |           |          |
| 270 ->289          | -0.17963  |           |           |          |
| 272 ->287          | -0.10187  |           |           |          |
| 272 ->288          | -0.12973  |           |           |          |
| 272 ->292          | -0.13326  |           |           |          |
| 273 ->290          | 0.10685   |           |           |          |
| 273 ->292          | -0.12015  |           |           |          |
| 275 ->287          | 0.13366   |           |           |          |
| 276 ->289          | 0.11218   |           |           |          |
| 277 ->286          | 0.10164   |           |           |          |
| 277 ->290          | -0.12205  |           |           |          |
| Excited State 108: | Singlet-A | 3.3866 eV | 366.10 nm | f=0.0006 |
| 270 ->286          | -0.10310  |           |           |          |
| 270 ->289          | 0.18044   |           |           |          |
| 272 ->293          | 0.11806   |           |           |          |
| 273 ->291          | 0.12989   |           |           |          |
| 275 ->287          | -0.15175  |           |           |          |
| 275 ->290          | -0.13177  |           |           |          |
| 275 ->292          | -0.19412  |           |           |          |
| 276 ->293          | 0.21239   |           |           |          |
| 277 ->293          | -0.16941  |           |           |          |
| 279 ->293          | 0.12314   |           |           |          |
| Excited State 109: | Singlet-A | 3.3897 eV | 365.77 nm | f=0.0004 |
| 278 ->286          | 0.10734   |           |           |          |
| 278 ->287          | -0.11594  |           |           |          |
| 278 ->288          | 0.25345   |           |           |          |
| 278 ->289          | -0.10064  |           |           |          |
| 278 ->290          | 0.25056   |           |           |          |
| 278 ->291          | -0.36451  |           |           |          |
| 278 ->293          | 0.40741   |           |           |          |
| Excited State 110: | Singlet-A | 3.3911 eV | 365.62 nm | f=0.0023 |
| 273 ->297          | -0.11417  |           |           |          |
| 277 ->297          | 0.10946   |           |           |          |
| 280 ->297          | -0.17563  |           |           |          |
| 281 ->297          | 0.11604   |           |           |          |
| 282 ->297          | 0.10717   |           |           |          |
| 283 ->297          | 0.59036   |           |           |          |
| Excited State 111: | Singlet-A | 3.4005 eV | 364.61 nm | f=0.0017 |

|           |          |
|-----------|----------|
| 268 ->289 | -0.14926 |
| 270 ->287 | -0.10556 |
| 270 ->291 | 0.10823  |
| 272 ->293 | -0.12617 |
| 275 ->286 | -0.10981 |
| 275 ->287 | -0.19133 |
| 275 ->291 | 0.17629  |
| 276 ->293 | -0.17354 |
| 277 ->290 | -0.10998 |
| 277 ->293 | 0.11612  |
| 279 ->290 | -0.20130 |
| 279 ->291 | -0.17908 |
| 279 ->292 | 0.20295  |
| 279 ->293 | -0.12384 |

Excited State 112: Singlet-A 3.4054 eV 364.08 nm f=0.0016

|           |          |
|-----------|----------|
| 275 ->286 | -0.10831 |
| 275 ->287 | -0.14202 |
| 275 ->290 | -0.15583 |
| 275 ->291 | 0.10792  |
| 277 ->291 | 0.14560  |
| 279 ->290 | 0.23620  |
| 279 ->291 | 0.31238  |
| 279 ->292 | -0.29092 |
| 279 ->293 | -0.10196 |

Excited State 113: Singlet-A 3.4074 eV 363.86 nm f=0.0042

|           |          |
|-----------|----------|
| 268 ->286 | 0.11040  |
| 268 ->289 | -0.19333 |
| 268 ->291 | -0.11047 |
| 268 ->292 | -0.22356 |
| 270 ->288 | 0.13889  |
| 270 ->289 | 0.12323  |
| 270 ->290 | 0.14222  |
| 270 ->292 | 0.23742  |
| 272 ->288 | -0.12035 |
| 272 ->290 | -0.10558 |
| 277 ->292 | -0.19293 |
| 279 ->290 | 0.12184  |
| 279 ->291 | 0.14183  |
| 279 ->292 | -0.11136 |

Excited State 114: Singlet-A 3.4138 eV 363.19 nm f=0.0022

|           |          |
|-----------|----------|
| 268 ->291 | -0.10856 |
|-----------|----------|

|                    |           |           |           |          |
|--------------------|-----------|-----------|-----------|----------|
| 268 ->292          | -0.10529  |           |           |          |
| 270 ->288          | -0.10096  |           |           |          |
| 275 ->289          | 0.23317   |           |           |          |
| 275 ->290          | 0.12679   |           |           |          |
| 275 ->291          | -0.21207  |           |           |          |
| 275 ->292          | -0.18507  |           |           |          |
| 276 ->289          | 0.19417   |           |           |          |
| 276 ->290          | 0.13400   |           |           |          |
| 276 ->291          | -0.22739  |           |           |          |
| 276 ->293          | -0.20054  |           |           |          |
| 279 ->293          | -0.13233  |           |           |          |
| Excited State 115: | Singlet-A | 3.4269 eV | 361.80 nm | f=0.0042 |
| 269 ->288          | -0.12806  |           |           |          |
| 271 ->288          | 0.16880   |           |           |          |
| 271 ->291          | 0.11028   |           |           |          |
| 271 ->292          | -0.10797  |           |           |          |
| 272 ->288          | 0.15467   |           |           |          |
| 272 ->292          | -0.11944  |           |           |          |
| 273 ->288          | 0.10051   |           |           |          |
| 273 ->292          | -0.13873  |           |           |          |
| 274 ->288          | 0.21014   |           |           |          |
| 274 ->289          | 0.22288   |           |           |          |
| 274 ->291          | 0.24305   |           |           |          |
| 275 ->292          | 0.10252   |           |           |          |
| Excited State 116: | Singlet-A | 3.4294 eV | 361.53 nm | f=0.0019 |
| 270 ->288          | -0.10483  |           |           |          |
| 272 ->289          | -0.17563  |           |           |          |
| 272 ->291          | -0.10214  |           |           |          |
| 272 ->292          | -0.14268  |           |           |          |
| 273 ->289          | -0.16211  |           |           |          |
| 273 ->292          | -0.11878  |           |           |          |
| 274 ->288          | -0.18807  |           |           |          |
| 274 ->292          | 0.23627   |           |           |          |
| 275 ->290          | 0.11238   |           |           |          |
| 275 ->291          | 0.14395   |           |           |          |
| 275 ->292          | 0.20111   |           |           |          |
| 275 ->293          | -0.12596  |           |           |          |
| 276 ->292          | 0.13221   |           |           |          |
| 279 ->293          | 0.13228   |           |           |          |
| Excited State 117: | Singlet-A | 3.4387 eV | 360.55 nm | f=0.0018 |
| 271 ->294          | -0.12386  |           |           |          |

|                    |           |           |           |          |
|--------------------|-----------|-----------|-----------|----------|
| 272 ->286          | -0.11141  |           |           |          |
| 272 ->288          | 0.14551   |           |           |          |
| 273 ->288          | -0.10393  |           |           |          |
| 274 ->286          | -0.21528  |           |           |          |
| 274 ->289          | -0.15475  |           |           |          |
| 274 ->293          | -0.11757  |           |           |          |
| 274 ->294          | 0.24067   |           |           |          |
| 280 ->294          | 0.10763   |           |           |          |
| 283 ->294          | -0.19326  |           |           |          |
| Excited State 118: | Singlet-A | 3.4414 eV | 360.27 nm | f=0.0006 |
| 278 ->289          | -0.25083  |           |           |          |
| 278 ->290          | -0.15204  |           |           |          |
| 278 ->291          | 0.35760   |           |           |          |
| 278 ->292          | 0.28718   |           |           |          |
| 278 ->293          | 0.35174   |           |           |          |
| 279 ->293          | -0.11800  |           |           |          |
| Excited State 119: | Singlet-A | 3.4439 eV | 360.01 nm | f=0.0133 |
| 268 ->286          | -0.14171  |           |           |          |
| 272 ->286          | 0.13657   |           |           |          |
| 272 ->288          | -0.14477  |           |           |          |
| 273 ->286          | -0.12053  |           |           |          |
| 273 ->288          | 0.18055   |           |           |          |
| 273 ->289          | -0.12578  |           |           |          |
| 274 ->294          | 0.19564   |           |           |          |
| 279 ->293          | 0.10529   |           |           |          |
| 280 ->294          | 0.12082   |           |           |          |
| 283 ->294          | -0.19112  |           |           |          |
| 285 ->298          | 0.12342   |           |           |          |
| 285 ->299          | 0.10198   |           |           |          |
| Excited State 120: | Singlet-A | 3.4509 eV | 359.28 nm | f=0.0008 |
| 272 ->288          | 0.12824   |           |           |          |
| 273 ->293          | -0.12656  |           |           |          |
| 276 ->293          | -0.17114  |           |           |          |
| 279 ->289          | 0.12095   |           |           |          |
| 279 ->293          | 0.50785   |           |           |          |
| Excited State 121: | Singlet-A | 3.4557 eV | 358.78 nm | f=0.0117 |
| 269 ->288          | -0.14210  |           |           |          |
| 269 ->291          | -0.12694  |           |           |          |
| 269 ->292          | 0.10157   |           |           |          |
| 271 ->288          | 0.12456   |           |           |          |

|                    |           |           |           |          |
|--------------------|-----------|-----------|-----------|----------|
| 271 ->291          | 0.13492   |           |           |          |
| 271 ->292          | -0.11548  |           |           |          |
| 273 ->288          | -0.11975  |           |           |          |
| 274 ->288          | -0.25318  |           |           |          |
| 274 ->291          | -0.16097  |           |           |          |
| 279 ->293          | -0.15354  |           |           |          |
| 280 ->294          | -0.13318  |           |           |          |
| 283 ->294          | 0.27303   |           |           |          |
| 285 ->298          | 0.10533   |           |           |          |
| Excited State 122: | Singlet-A | 3.4596 eV | 358.38 nm | f=0.0026 |
| 271 ->286          | 0.10338   |           |           |          |
| 273 ->286          | 0.17967   |           |           |          |
| 273 ->288          | -0.12837  |           |           |          |
| 273 ->289          | 0.12014   |           |           |          |
| 274 ->286          | 0.28773   |           |           |          |
| 274 ->287          | -0.14529  |           |           |          |
| 274 ->288          | -0.10513  |           |           |          |
| 274 ->289          | 0.18760   |           |           |          |
| 274 ->293          | 0.12834   |           |           |          |
| 280 ->294          | 0.13924   |           |           |          |
| 283 ->294          | -0.24318  |           |           |          |
| Excited State 123: | Singlet-A | 3.4628 eV | 358.05 nm | f=0.0191 |
| 273 ->292          | -0.10056  |           |           |          |
| 283 ->294          | 0.14866   |           |           |          |
| 285 ->298          | 0.37138   |           |           |          |
| 285 ->299          | 0.32224   |           |           |          |
| Excited State 124: | Singlet-A | 3.4679 eV | 357.52 nm | f=0.0008 |
| 273 ->288          | -0.10446  |           |           |          |
| 273 ->293          | 0.10186   |           |           |          |
| 274 ->286          | 0.18947   |           |           |          |
| 274 ->287          | -0.14757  |           |           |          |
| 275 ->290          | 0.29387   |           |           |          |
| 275 ->291          | 0.16343   |           |           |          |
| 275 ->292          | -0.14318  |           |           |          |
| 275 ->293          | 0.18478   |           |           |          |
| 277 ->293          | 0.15164   |           |           |          |
| 279 ->293          | 0.15725   |           |           |          |
| Excited State 125: | Singlet-A | 3.4717 eV | 357.13 nm | f=0.0007 |
| 272 ->288          | 0.12982   |           |           |          |
| 273 ->293          | -0.12846  |           |           |          |

|                           |                  |                  |                  |                 |
|---------------------------|------------------|------------------|------------------|-----------------|
| 274 ->286                 | -0.10964         |                  |                  |                 |
| 274 ->287                 | 0.11843          |                  |                  |                 |
| 274 ->293                 | 0.10512          |                  |                  |                 |
| 275 ->289                 | -0.14767         |                  |                  |                 |
| 275 ->290                 | 0.24385          |                  |                  |                 |
| 275 ->291                 | 0.17822          |                  |                  |                 |
| 275 ->292                 | -0.19012         |                  |                  |                 |
| 275 ->293                 | -0.21826         |                  |                  |                 |
| 276 ->290                 | -0.11317         |                  |                  |                 |
| 276 ->291                 | -0.10210         |                  |                  |                 |
| 277 ->293                 | -0.15575         |                  |                  |                 |
| 279 ->293                 | -0.13895         |                  |                  |                 |
| <b>Excited State 126:</b> | <b>Singlet-A</b> | <b>3.4843 eV</b> | <b>355.83 nm</b> | <b>f=0.0016</b> |
| 271 ->294                 | -0.14204         |                  |                  |                 |
| 274 ->294                 | 0.27249          |                  |                  |                 |
| 280 ->294                 | -0.11690         |                  |                  |                 |
| 280 ->296                 | 0.25093          |                  |                  |                 |
| 281 ->296                 | -0.21332         |                  |                  |                 |
| 282 ->296                 | 0.20550          |                  |                  |                 |
| 283 ->294                 | 0.20775          |                  |                  |                 |
| 283 ->296                 | 0.23271          |                  |                  |                 |
| <b>Excited State 127:</b> | <b>Singlet-A</b> | <b>3.4852 eV</b> | <b>355.75 nm</b> | <b>f=0.0013</b> |
| 271 ->294                 | 0.13419          |                  |                  |                 |
| 274 ->294                 | -0.25905         |                  |                  |                 |
| 280 ->294                 | 0.11515          |                  |                  |                 |
| 280 ->296                 | 0.27603          |                  |                  |                 |
| 281 ->296                 | -0.21366         |                  |                  |                 |
| 282 ->296                 | 0.22524          |                  |                  |                 |
| 283 ->294                 | -0.19278         |                  |                  |                 |
| 283 ->296                 | 0.27527          |                  |                  |                 |
| <b>Excited State 128:</b> | <b>Singlet-A</b> | <b>3.4935 eV</b> | <b>354.90 nm</b> | <b>f=0.0006</b> |
| 285 ->295                 | 0.69206          |                  |                  |                 |
| <b>Excited State 129:</b> | <b>Singlet-A</b> | <b>3.4957 eV</b> | <b>354.68 nm</b> | <b>f=0.0014</b> |
| 268 ->286                 | 0.18043          |                  |                  |                 |
| 269 ->287                 | -0.14745         |                  |                  |                 |
| 269 ->293                 | -0.14212         |                  |                  |                 |
| 270 ->286                 | 0.11221          |                  |                  |                 |
| 270 ->288                 | -0.16470         |                  |                  |                 |
| 270 ->289                 | 0.10991          |                  |                  |                 |
| 270 ->293                 | 0.11857          |                  |                  |                 |



|           |          |
|-----------|----------|
| 271 ->293 | 0.13319  |
| 272 ->286 | 0.13203  |
| 273 ->287 | 0.11059  |
| 273 ->288 | 0.10070  |
| 273 ->290 | 0.13258  |
| 273 ->293 | 0.11192  |
| 274 ->286 | -0.17284 |
| 274 ->287 | 0.11824  |
| 274 ->288 | -0.13170 |
| 274 ->289 | 0.11323  |
| 274 ->293 | 0.15490  |
| 275 ->293 | 0.11318  |
| 277 ->293 | 0.13291  |

Excited State 130: Singlet-A 3.4976 eV 354.49 nm f=0.0246

|           |          |
|-----------|----------|
| 268 ->286 | 0.11035  |
| 268 ->288 | -0.12787 |
| 270 ->286 | 0.13487  |
| 270 ->287 | -0.10052 |
| 270 ->288 | -0.11594 |
| 271 ->293 | -0.10403 |
| 272 ->287 | -0.13673 |
| 273 ->288 | 0.15394  |
| 274 ->286 | 0.12109  |
| 274 ->293 | -0.13236 |
| 283 ->298 | 0.28022  |
| 283 ->299 | -0.20652 |

Excited State 131: Singlet-A 3.5039 eV 353.85 nm f=0.0078

|           |          |
|-----------|----------|
| 272 ->286 | -0.14162 |
| 272 ->287 | 0.12968  |
| 272 ->288 | -0.12122 |
| 273 ->286 | -0.10362 |
| 273 ->287 | 0.13327  |
| 273 ->288 | -0.14620 |
| 273 ->290 | -0.10255 |
| 274 ->290 | 0.13963  |
| 274 ->293 | 0.14660  |
| 283 ->298 | 0.28521  |
| 283 ->299 | -0.25064 |

Excited State 132: Singlet-A 3.5061 eV 353.62 nm f=0.0004

|           |         |
|-----------|---------|
| 284 ->294 | 0.69638 |
|-----------|---------|

|                    |           |           |           |          |
|--------------------|-----------|-----------|-----------|----------|
| Excited State 133: | Singlet-A | 3.5126 eV | 352.97 nm | f=0.0142 |
| 268 ->286          | -0.16420  |           |           |          |
| 268 ->289          | -0.11244  |           |           |          |
| 270 ->288          | 0.25088   |           |           |          |
| 270 ->290          | 0.13316   |           |           |          |
| 270 ->291          | -0.11344  |           |           |          |
| 272 ->290          | 0.14169   |           |           |          |
| 272 ->293          | 0.12038   |           |           |          |
| 273 ->286          | 0.17796   |           |           |          |
| 273 ->287          | -0.10246  |           |           |          |
| 273 ->291          | -0.12523  |           |           |          |
| 273 ->293          | 0.14547   |           |           |          |
| 274 ->288          | -0.12543  |           |           |          |
| 274 ->289          | 0.10972   |           |           |          |
| 283 ->298          | 0.16454   |           |           |          |
| 283 ->299          | -0.14469  |           |           |          |

|                    |           |           |           |          |
|--------------------|-----------|-----------|-----------|----------|
| Excited State 134: | Singlet-A | 3.5217 eV | 352.05 nm | f=0.0046 |
| 269 ->286          | 0.16223   |           |           |          |
| 269 ->287          | 0.10260   |           |           |          |
| 269 ->293          | 0.12222   |           |           |          |
| 271 ->288          | 0.12459   |           |           |          |
| 271 ->293          | -0.12578  |           |           |          |
| 272 ->289          | 0.12815   |           |           |          |
| 272 ->293          | 0.11313   |           |           |          |
| 273 ->286          | -0.10775  |           |           |          |
| 273 ->289          | 0.16491   |           |           |          |
| 273 ->293          | 0.18321   |           |           |          |
| 274 ->288          | -0.14152  |           |           |          |
| 274 ->289          | 0.26071   |           |           |          |
| 274 ->292          | 0.11443   |           |           |          |
| 274 ->293          | 0.21609   |           |           |          |
| 274 ->294          | 0.11297   |           |           |          |

|                    |           |           |           |          |
|--------------------|-----------|-----------|-----------|----------|
| Excited State 135: | Singlet-A | 3.5265 eV | 351.58 nm | f=0.0026 |
| 268 ->286          | 0.13807   |           |           |          |
| 268 ->292          | -0.17007  |           |           |          |
| 272 ->289          | 0.24113   |           |           |          |
| 272 ->291          | 0.23597   |           |           |          |
| 272 ->292          | 0.26633   |           |           |          |
| 273 ->289          | -0.16648  |           |           |          |
| 273 ->290          | -0.11683  |           |           |          |
| 273 ->291          | -0.13409  |           |           |          |
| 273 ->292          | -0.23887  |           |           |          |

|                    |           |           |           |          |
|--------------------|-----------|-----------|-----------|----------|
| Excited State 136: | Singlet-A | 3.5381 eV | 350.43 nm | f=0.0027 |
| 269 ->286          | 0.13531   |           |           |          |
| 269 ->287          | 0.22423   |           |           |          |
| 269 ->289          | -0.16791  |           |           |          |
| 269 ->293          | -0.19150  |           |           |          |
| 270 ->289          | 0.14958   |           |           |          |
| 270 ->293          | 0.11354   |           |           |          |
| 271 ->289          | 0.16028   |           |           |          |
| 271 ->293          | 0.15986   |           |           |          |
| 272 ->286          | -0.12829  |           |           |          |
| 272 ->287          | -0.17944  |           |           |          |
| 273 ->287          | -0.14923  |           |           |          |
| 274 ->292          | 0.10629   |           |           |          |
| 275 ->293          | 0.15156   |           |           |          |

|                    |           |           |           |          |
|--------------------|-----------|-----------|-----------|----------|
| Excited State 137: | Singlet-A | 3.5500 eV | 349.26 nm | f=0.0019 |
| 268 ->288          | -0.16479  |           |           |          |
| 270 ->286          | 0.20066   |           |           |          |
| 270 ->287          | 0.24720   |           |           |          |
| 270 ->288          | 0.18349   |           |           |          |
| 270 ->289          | 0.11190   |           |           |          |
| 270 ->291          | 0.12980   |           |           |          |
| 272 ->286          | -0.14112  |           |           |          |
| 272 ->287          | -0.16635  |           |           |          |
| 272 ->288          | -0.17944  |           |           |          |
| 272 ->289          | -0.10672  |           |           |          |
| 272 ->292          | 0.12289   |           |           |          |
| 273 ->287          | 0.11968   |           |           |          |
| 275 ->287          | -0.10933  |           |           |          |
| 275 ->292          | 0.11654   |           |           |          |

|                    |           |           |           |          |
|--------------------|-----------|-----------|-----------|----------|
| Excited State 138: | Singlet-A | 3.5537 eV | 348.88 nm | f=0.0013 |
| 271 ->296          | -0.18116  |           |           |          |
| 274 ->289          | -0.12306  |           |           |          |
| 274 ->292          | -0.10132  |           |           |          |
| 274 ->296          | 0.36938   |           |           |          |
| 275 ->296          | -0.12966  |           |           |          |
| 276 ->296          | -0.13062  |           |           |          |
| 280 ->296          | 0.11420   |           |           |          |
| 281 ->296          | -0.18026  |           |           |          |
| 283 ->296          | -0.32444  |           |           |          |
| 285 ->296          | 0.12282   |           |           |          |

|                    |           |           |           |          |
|--------------------|-----------|-----------|-----------|----------|
| Excited State 139: | Singlet-A | 3.5659 eV | 347.70 nm | f=0.0015 |
| 271 ->292          | 0.11780   |           |           |          |
| 273 ->292          | 0.13853   |           |           |          |
| 274 ->287          | -0.11508  |           |           |          |
| 274 ->289          | 0.19775   |           |           |          |
| 274 ->290          | 0.20751   |           |           |          |
| 274 ->292          | 0.35941   |           |           |          |
| 274 ->293          | -0.24703  |           |           |          |
| 274 ->296          | 0.10606   |           |           |          |
| 275 ->292          | -0.10189  |           |           |          |
| 283 ->296          | -0.13182  |           |           |          |
| Excited State 140: | Singlet-A | 3.5720 eV | 347.10 nm | f=0.0009 |
| 285 ->297          | 0.65647   |           |           |          |
| Excited State 141: | Singlet-A | 3.5725 eV | 347.05 nm | f=0.0099 |
| 268 ->292          | -0.11636  |           |           |          |
| 270 ->289          | -0.10630  |           |           |          |
| 273 ->292          | 0.12044   |           |           |          |
| 280 ->295          | 0.11019   |           |           |          |
| 283 ->301          | -0.18958  |           |           |          |
| 284 ->298          | -0.21946  |           |           |          |
| 284 ->299          | 0.27213   |           |           |          |
| 284 ->301          | 0.20001   |           |           |          |
| 285 ->297          | -0.21172  |           |           |          |
| Excited State 142: | Singlet-A | 3.5770 eV | 346.61 nm | f=0.0012 |
| 268 ->286          | 0.14391   |           |           |          |
| 268 ->287          | -0.12780  |           |           |          |
| 268 ->288          | 0.17916   |           |           |          |
| 268 ->289          | -0.11098  |           |           |          |
| 268 ->291          | -0.10083  |           |           |          |
| 269 ->286          | -0.12593  |           |           |          |
| 270 ->292          | -0.14085  |           |           |          |
| 271 ->286          | 0.29092   |           |           |          |
| 271 ->287          | -0.22325  |           |           |          |
| 274 ->286          | -0.11595  |           |           |          |
| Excited State 143: | Singlet-A | 3.5774 eV | 346.57 nm | f=0.0010 |
| 270 ->289          | 0.13799   |           |           |          |
| 270 ->290          | 0.10229   |           |           |          |
| 272 ->289          | 0.16024   |           |           |          |
| 272 ->290          | 0.13193   |           |           |          |
| 272 ->291          | -0.11264  |           |           |          |

|           |          |
|-----------|----------|
| 272 ->293 | -0.11794 |
| 273 ->291 | -0.19380 |
| 273 ->292 | -0.13489 |
| 273 ->293 | -0.13481 |
| 274 ->291 | 0.16064  |
| 274 ->292 | 0.15707  |
| 280 ->295 | 0.22786  |
| 281 ->295 | -0.20066 |
| 282 ->295 | 0.15161  |
| 283 ->295 | 0.10702  |

|                    |           |           |           |          |
|--------------------|-----------|-----------|-----------|----------|
| Excited State 144: | Singlet-A | 3.5817 eV | 346.16 nm | f=0.0002 |
| 268 ->288          | 0.12917   |           |           |          |
| 274 ->292          | -0.10562  |           |           |          |
| 280 ->295          | 0.33118   |           |           |          |
| 281 ->295          | -0.29748  |           |           |          |
| 282 ->295          | 0.22043   |           |           |          |
| 283 ->295          | 0.14325   |           |           |          |

|                    |           |           |           |          |
|--------------------|-----------|-----------|-----------|----------|
| Excited State 145: | Singlet-A | 3.5838 eV | 345.96 nm | f=0.0007 |
| 268 ->288          | -0.22703  |           |           |          |
| 268 ->290          | -0.10210  |           |           |          |
| 269 ->286          | -0.13095  |           |           |          |
| 269 ->287          | 0.15509   |           |           |          |
| 270 ->287          | -0.18972  |           |           |          |
| 271 ->286          | 0.23686   |           |           |          |
| 271 ->287          | -0.13249  |           |           |          |
| 271 ->288          | -0.13004  |           |           |          |
| 271 ->290          | -0.10086  |           |           |          |
| 272 ->287          | 0.12356   |           |           |          |
| 272 ->291          | 0.13230   |           |           |          |
| 272 ->293          | 0.10654   |           |           |          |
| 273 ->286          | -0.10919  |           |           |          |
| 273 ->289          | -0.11926  |           |           |          |
| 273 ->293          | 0.12486   |           |           |          |

|                    |           |           |           |          |
|--------------------|-----------|-----------|-----------|----------|
| Excited State 146: | Singlet-A | 3.5913 eV | 345.23 nm | f=0.0143 |
| 268 ->288          | 0.17083   |           |           |          |
| 268 ->289          | 0.12741   |           |           |          |
| 268 ->290          | 0.16938   |           |           |          |
| 268 ->292          | 0.17181   |           |           |          |
| 270 ->289          | 0.11076   |           |           |          |
| 270 ->291          | 0.19545   |           |           |          |
| 270 ->292          | 0.20992   |           |           |          |

|                    |           |           |           |          |
|--------------------|-----------|-----------|-----------|----------|
| 272 ->292          | 0.10026   |           |           |          |
| 273 ->289          | -0.12027  |           |           |          |
| 273 ->290          | -0.11020  |           |           |          |
| 273 ->292          | -0.10712  |           |           |          |
| 280 ->295          | -0.10462  |           |           |          |
| 281 ->295          | 0.10451   |           |           |          |
| 284 ->298          | -0.17436  |           |           |          |
| 284 ->299          | 0.19864   |           |           |          |
| 284 ->301          | 0.12534   |           |           |          |
| Excited State 147: | Singlet-A | 3.5948 eV | 344.90 nm | f=0.0010 |
| 269 ->288          | -0.18349  |           |           |          |
| 269 ->289          | -0.12922  |           |           |          |
| 269 ->290          | 0.14478   |           |           |          |
| 271 ->296          | -0.11798  |           |           |          |
| 274 ->296          | 0.23393   |           |           |          |
| 280 ->296          | -0.22971  |           |           |          |
| 281 ->296          | 0.10236   |           |           |          |
| 283 ->296          | 0.33178   |           |           |          |
| Excited State 148: | Singlet-A | 3.5956 eV | 344.82 nm | f=0.0007 |
| 269 ->288          | 0.21060   |           |           |          |
| 269 ->289          | 0.13853   |           |           |          |
| 269 ->290          | -0.19208  |           |           |          |
| 270 ->291          | 0.10967   |           |           |          |
| 271 ->288          | 0.10040   |           |           |          |
| 272 ->290          | 0.14028   |           |           |          |
| 273 ->290          | 0.15043   |           |           |          |
| 274 ->296          | 0.17681   |           |           |          |
| 280 ->296          | -0.17227  |           |           |          |
| 283 ->296          | 0.25057   |           |           |          |
| Excited State 149: | Singlet-A | 3.6002 eV | 344.38 nm | f=0.0000 |
| 280 ->294          | -0.19259  |           |           |          |
| 281 ->294          | 0.21742   |           |           |          |
| 282 ->294          | 0.62306   |           |           |          |
| 283 ->294          | -0.14122  |           |           |          |
| Excited State 150: | Singlet-A | 3.6010 eV | 344.30 nm | f=0.0038 |
| 272 ->295          | 0.21850   |           |           |          |
| 273 ->295          | -0.18529  |           |           |          |
| 275 ->295          | 0.16142   |           |           |          |
| 276 ->295          | -0.25264  |           |           |          |
| 277 ->295          | 0.32610   |           |           |          |

|                    |           |           |           |          |
|--------------------|-----------|-----------|-----------|----------|
| 283 ->295          | -0.12378  |           |           |          |
| 283 ->301          | -0.16094  |           |           |          |
| Excited State 151: | Singlet-A | 3.6039 eV | 344.03 nm | f=0.0008 |
| 271 ->286          | -0.14519  |           |           |          |
| 271 ->287          | 0.11464   |           |           |          |
| 273 ->291          | 0.11582   |           |           |          |
| 273 ->293          | -0.10391  |           |           |          |
| 274 ->286          | -0.11132  |           |           |          |
| 274 ->287          | 0.13067   |           |           |          |
| 274 ->288          | -0.24597  |           |           |          |
| 274 ->290          | -0.25497  |           |           |          |
| 274 ->291          | 0.26294   |           |           |          |
| 274 ->293          | -0.25851  |           |           |          |
| Excited State 152: | Singlet-A | 3.6064 eV | 343.79 nm | f=0.0006 |
| 270 ->288          | 0.15216   |           |           |          |
| 270 ->289          | 0.14977   |           |           |          |
| 270 ->290          | -0.14942  |           |           |          |
| 270 ->291          | 0.11760   |           |           |          |
| 270 ->292          | -0.13450  |           |           |          |
| 272 ->286          | 0.22457   |           |           |          |
| 272 ->287          | 0.30683   |           |           |          |
| 273 ->286          | -0.15776  |           |           |          |
| 273 ->287          | -0.27295  |           |           |          |
| Excited State 153: | Singlet-A | 3.6104 eV | 343.41 nm | f=0.0001 |
| 270 ->286          | 0.23834   |           |           |          |
| 270 ->287          | 0.32966   |           |           |          |
| 270 ->290          | 0.14760   |           |           |          |
| 270 ->292          | 0.11155   |           |           |          |
| 271 ->287          | -0.11102  |           |           |          |
| 272 ->288          | 0.18729   |           |           |          |
| 272 ->289          | 0.14650   |           |           |          |
| 272 ->290          | -0.10636  |           |           |          |
| 272 ->291          | 0.16895   |           |           |          |
| 272 ->292          | -0.15552  |           |           |          |
| 273 ->287          | -0.10833  |           |           |          |
| 273 ->288          | -0.16568  |           |           |          |
| 273 ->289          | -0.11386  |           |           |          |
| 275 ->287          | -0.10873  |           |           |          |
| Excited State 154: | Singlet-A | 3.6141 eV | 343.06 nm | f=0.0124 |
| 269 ->291          | 0.11815   |           |           |          |

|                    |           |           |           |          |
|--------------------|-----------|-----------|-----------|----------|
| 269 ->292          | -0.13008  |           |           |          |
| 271 ->289          | 0.16233   |           |           |          |
| 274 ->296          | 0.13469   |           |           |          |
| 280 ->298          | 0.20219   |           |           |          |
| 280 ->299          | 0.18825   |           |           |          |
| 281 ->298          | -0.15514  |           |           |          |
| 281 ->299          | -0.14008  |           |           |          |
| 282 ->298          | 0.13523   |           |           |          |
| 282 ->299          | 0.12875   |           |           |          |
| 283 ->299          | 0.11247   |           |           |          |
| 285 ->300          | 0.13450   |           |           |          |
| 285 ->302          | 0.13333   |           |           |          |
| 285 ->304          | 0.12317   |           |           |          |
| Excited State 155: | Singlet-A | 3.6189 eV | 342.60 nm | f=0.0025 |
| 269 ->290          | 0.12401   |           |           |          |
| 269 ->291          | 0.19510   |           |           |          |
| 269 ->292          | -0.10878  |           |           |          |
| 271 ->288          | 0.13780   |           |           |          |
| 271 ->291          | 0.10468   |           |           |          |
| 276 ->295          | 0.10933   |           |           |          |
| 277 ->295          | -0.12972  |           |           |          |
| 280 ->300          | -0.13444  |           |           |          |
| 280 ->301          | 0.10306   |           |           |          |
| 281 ->300          | 0.11038   |           |           |          |
| 282 ->300          | -0.12683  |           |           |          |
| 283 ->299          | -0.14068  |           |           |          |
| 283 ->300          | -0.18553  |           |           |          |
| 283 ->301          | -0.12696  |           |           |          |
| Excited State 156: | Singlet-A | 3.6219 eV | 342.32 nm | f=0.0001 |
| 284 ->296          | 0.69763   |           |           |          |
| Excited State 157: | Singlet-A | 3.6233 eV | 342.18 nm | f=0.0031 |
| 268 ->291          | -0.15050  |           |           |          |
| 269 ->290          | 0.14682   |           |           |          |
| 269 ->291          | 0.18581   |           |           |          |
| 269 ->292          | -0.17830  |           |           |          |
| 271 ->288          | 0.13127   |           |           |          |
| 277 ->295          | 0.10199   |           |           |          |
| 283 ->301          | 0.22228   |           |           |          |
| 285 ->300          | -0.14280  |           |           |          |
| Excited State 158: | Singlet-A | 3.6298 eV | 341.58 nm | f=0.0088 |



|                    |           |           |           |          |
|--------------------|-----------|-----------|-----------|----------|
| 280 ->300          | -0.18386  |           |           |          |
| 281 ->300          | 0.20787   |           |           |          |
| 282 ->300          | -0.15389  |           |           |          |
| 283 ->300          | -0.10314  |           |           |          |
| 283 ->301          | 0.19403   |           |           |          |
| 283 ->303          | -0.10461  |           |           |          |
| 285 ->300          | 0.26851   |           |           |          |
| 285 ->302          | 0.15173   |           |           |          |
| 285 ->304          | 0.12383   |           |           |          |
| Excited State 159: | Singlet-A | 3.6393 eV | 340.68 nm | f=0.0002 |
| 269 ->288          | 0.11758   |           |           |          |
| 274 ->294          | 0.12894   |           |           |          |
| 276 ->294          | 0.34928   |           |           |          |
| 277 ->294          | 0.46954   |           |           |          |
| 279 ->294          | -0.12133  |           |           |          |
| Excited State 160: | Singlet-A | 3.6456 eV | 340.10 nm | f=0.0001 |
| 269 ->286          | 0.31270   |           |           |          |
| 269 ->287          | -0.19875  |           |           |          |
| 269 ->288          | -0.18192  |           |           |          |
| 269 ->289          | 0.14212   |           |           |          |
| 269 ->293          | 0.10016   |           |           |          |
| 270 ->286          | 0.10108   |           |           |          |
| 271 ->286          | 0.15748   |           |           |          |
| 271 ->287          | -0.10418  |           |           |          |
| 271 ->288          | -0.14155  |           |           |          |
| 271 ->289          | 0.20162   |           |           |          |
| 271 ->293          | 0.10931   |           |           |          |
| 276 ->294          | 0.12505   |           |           |          |
| 277 ->294          | 0.17825   |           |           |          |
| Excited State 161: | Singlet-A | 3.6515 eV | 339.54 nm | f=0.0061 |
| 268 ->289          | 0.24114   |           |           |          |
| 268 ->290          | 0.13043   |           |           |          |
| 268 ->291          | -0.23391  |           |           |          |
| 268 ->292          | -0.17576  |           |           |          |
| 270 ->289          | -0.19097  |           |           |          |
| 270 ->290          | -0.11901  |           |           |          |
| 270 ->291          | 0.13880   |           |           |          |
| 270 ->292          | 0.13297   |           |           |          |
| 271 ->289          | 0.10690   |           |           |          |
| 272 ->293          | 0.10608   |           |           |          |
| 275 ->291          | 0.10935   |           |           |          |

|                    |           |           |           |          |
|--------------------|-----------|-----------|-----------|----------|
| 275 ->293          | 0.16963   |           |           |          |
| 283 ->303          | 0.16041   |           |           |          |
| Excited State 162: | Singlet-A | 3.6543 eV | 339.28 nm | f=0.0018 |
| 271 ->286          | 0.10396   |           |           |          |
| 274 ->298          | 0.10564   |           |           |          |
| 280 ->297          | -0.11484  |           |           |          |
| 280 ->298          | -0.17369  |           |           |          |
| 280 ->299          | -0.12249  |           |           |          |
| 283 ->300          | 0.10011   |           |           |          |
| 285 ->300          | 0.12545   |           |           |          |
| 285 ->302          | 0.29373   |           |           |          |
| 285 ->304          | -0.13598  |           |           |          |
| 285 ->305          | 0.23021   |           |           |          |
| Excited State 163: | Singlet-A | 3.6581 eV | 338.93 nm | f=0.0001 |
| 270 ->287          | -0.16227  |           |           |          |
| 270 ->289          | 0.10566   |           |           |          |
| 270 ->290          | -0.13959  |           |           |          |
| 270 ->291          | 0.11056   |           |           |          |
| 270 ->292          | -0.14980  |           |           |          |
| 272 ->287          | -0.15150  |           |           |          |
| 272 ->288          | 0.15127   |           |           |          |
| 272 ->289          | 0.11759   |           |           |          |
| 272 ->290          | -0.17237  |           |           |          |
| 272 ->292          | -0.12523  |           |           |          |
| 273 ->287          | 0.17470   |           |           |          |
| 273 ->288          | -0.16192  |           |           |          |
| 273 ->289          | -0.12622  |           |           |          |
| 273 ->290          | 0.16044   |           |           |          |
| 273 ->291          | -0.11029  |           |           |          |
| 273 ->292          | 0.16865   |           |           |          |
| 280 ->297          | -0.15281  |           |           |          |
| 281 ->297          | 0.13403   |           |           |          |
| 282 ->297          | -0.11060  |           |           |          |
| Excited State 164: | Singlet-A | 3.6601 eV | 338.74 nm | f=0.0012 |
| 280 ->297          | 0.37088   |           |           |          |
| 281 ->297          | -0.33704  |           |           |          |
| 282 ->297          | 0.25895   |           |           |          |
| 283 ->297          | 0.15403   |           |           |          |
| 285 ->304          | -0.10978  |           |           |          |
| Excited State 165: | Singlet-A | 3.6621 eV | 338.56 nm | f=0.0000 |

|                    |           |           |           |          |
|--------------------|-----------|-----------|-----------|----------|
| 271 ->289          | -0.11891  |           |           |          |
| 272 ->291          | 0.11063   |           |           |          |
| 273 ->289          | -0.11225  |           |           |          |
| 273 ->291          | 0.12310   |           |           |          |
| 273 ->292          | 0.10086   |           |           |          |
| 273 ->293          | 0.11925   |           |           |          |
| 274 ->289          | -0.23707  |           |           |          |
| 274 ->290          | -0.14928  |           |           |          |
| 274 ->291          | 0.32127   |           |           |          |
| 274 ->292          | 0.24719   |           |           |          |
| 274 ->293          | 0.27411   |           |           |          |
| Excited State 166: | Singlet-A | 3.6736 eV | 337.50 nm | f=0.0005 |
| 269 ->286          | -0.10447  |           |           |          |
| 269 ->289          | -0.12569  |           |           |          |
| 269 ->292          | -0.14087  |           |           |          |
| 269 ->293          | 0.17053   |           |           |          |
| 271 ->289          | 0.30042   |           |           |          |
| 271 ->290          | 0.18737   |           |           |          |
| 271 ->291          | 0.12202   |           |           |          |
| 271 ->292          | 0.36741   |           |           |          |
| Excited State 167: | Singlet-A | 3.6779 eV | 337.10 nm | f=0.0077 |
| 270 ->293          | 0.11081   |           |           |          |
| 270 ->295          | -0.10044  |           |           |          |
| 272 ->295          | -0.11580  |           |           |          |
| 273 ->295          | 0.17543   |           |           |          |
| 275 ->295          | 0.12778   |           |           |          |
| 276 ->294          | 0.15200   |           |           |          |
| 276 ->295          | -0.16113  |           |           |          |
| 279 ->294          | 0.19296   |           |           |          |
| 281 ->295          | 0.10678   |           |           |          |
| 281 ->298          | 0.13452   |           |           |          |
| 283 ->303          | 0.14952   |           |           |          |
| 285 ->304          | 0.12156   |           |           |          |
| Excited State 168: | Singlet-A | 3.6795 eV | 336.96 nm | f=0.0002 |
| 273 ->295          | -0.12802  |           |           |          |
| 274 ->294          | 0.12073   |           |           |          |
| 275 ->294          | 0.13506   |           |           |          |
| 276 ->294          | 0.30958   |           |           |          |
| 276 ->295          | 0.11810   |           |           |          |
| 277 ->294          | -0.14889  |           |           |          |
| 279 ->294          | 0.47798   |           |           |          |

|                    |           |           |           |          |
|--------------------|-----------|-----------|-----------|----------|
| Excited State 169: | Singlet-A | 3.6826 eV | 336.67 nm | f=0.0037 |
| 270 ->290          | -0.14482  |           |           |          |
| 270 ->295          | -0.10025  |           |           |          |
| 272 ->290          | 0.12434   |           |           |          |
| 272 ->291          | 0.10400   |           |           |          |
| 272 ->295          | -0.12434  |           |           |          |
| 273 ->295          | 0.18260   |           |           |          |
| 275 ->295          | 0.13249   |           |           |          |
| 276 ->295          | -0.16684  |           |           |          |
| 279 ->294          | 0.15081   |           |           |          |
| 281 ->295          | 0.17556   |           |           |          |
| 281 ->298          | -0.13213  |           |           |          |
| 283 ->303          | -0.11464  |           |           |          |
| 284 ->303          | -0.10022  |           |           |          |
| 285 ->304          | -0.14341  |           |           |          |

|                    |           |           |           |          |
|--------------------|-----------|-----------|-----------|----------|
| Excited State 170: | Singlet-A | 3.6846 eV | 336.49 nm | f=0.0038 |
| 270 ->288          | -0.11072  |           |           |          |
| 270 ->289          | -0.11508  |           |           |          |
| 270 ->290          | 0.26564   |           |           |          |
| 270 ->291          | 0.17458   |           |           |          |
| 270 ->292          | -0.13011  |           |           |          |
| 270 ->293          | -0.11708  |           |           |          |
| 272 ->290          | -0.20147  |           |           |          |
| 272 ->291          | -0.16634  |           |           |          |
| 272 ->292          | 0.17360   |           |           |          |
| 272 ->293          | 0.12428   |           |           |          |
| 281 ->298          | -0.11040  |           |           |          |
| 285 ->304          | -0.12206  |           |           |          |

|                    |           |           |           |          |
|--------------------|-----------|-----------|-----------|----------|
| Excited State 171: | Singlet-A | 3.6858 eV | 336.39 nm | f=0.0004 |
| 268 ->293          | -0.11875  |           |           |          |
| 269 ->286          | -0.12359  |           |           |          |
| 269 ->289          | 0.17495   |           |           |          |
| 269 ->290          | 0.10188   |           |           |          |
| 269 ->292          | 0.11921   |           |           |          |
| 269 ->293          | 0.16224   |           |           |          |
| 270 ->293          | 0.30642   |           |           |          |
| 271 ->286          | -0.11666  |           |           |          |
| 271 ->287          | 0.13958   |           |           |          |
| 271 ->288          | -0.13711  |           |           |          |
| 271 ->293          | 0.10238   |           |           |          |
| 272 ->293          | -0.18817  |           |           |          |

|                    |           |           |           |          |
|--------------------|-----------|-----------|-----------|----------|
| 273 ->293          | 0.10127   |           |           |          |
| 275 ->293          | -0.10053  |           |           |          |
| Excited State 172: | Singlet-A | 3.6899 eV | 336.01 nm | f=0.0064 |
| 269 ->289          | 0.12557   |           |           |          |
| 269 ->293          | 0.17320   |           |           |          |
| 270 ->293          | -0.13871  |           |           |          |
| 271 ->287          | 0.10250   |           |           |          |
| 271 ->288          | -0.12086  |           |           |          |
| 271 ->293          | 0.17873   |           |           |          |
| 272 ->293          | 0.18197   |           |           |          |
| 272 ->297          | 0.13051   |           |           |          |
| 273 ->297          | -0.11168  |           |           |          |
| 276 ->297          | -0.13588  |           |           |          |
| 277 ->297          | 0.18824   |           |           |          |
| 281 ->295          | 0.11396   |           |           |          |
| 283 ->300          | 0.10303   |           |           |          |
| Excited State 173: | Singlet-A | 3.6916 eV | 335.85 nm | f=0.0001 |
| 270 ->293          | 0.19900   |           |           |          |
| 272 ->293          | -0.16605  |           |           |          |
| 272 ->297          | 0.16009   |           |           |          |
| 273 ->297          | -0.14092  |           |           |          |
| 275 ->297          | 0.11341   |           |           |          |
| 276 ->297          | -0.18889  |           |           |          |
| 277 ->297          | 0.25037   |           |           |          |
| 280 ->295          | 0.23021   |           |           |          |
| 281 ->295          | 0.26229   |           |           |          |
| Excited State 174: | Singlet-A | 3.6935 eV | 335.68 nm | f=0.0003 |
| 272 ->295          | 0.12206   |           |           |          |
| 272 ->297          | -0.12681  |           |           |          |
| 273 ->295          | -0.15057  |           |           |          |
| 273 ->297          | 0.11511   |           |           |          |
| 276 ->295          | 0.12541   |           |           |          |
| 276 ->297          | 0.13739   |           |           |          |
| 277 ->297          | -0.18658  |           |           |          |
| 280 ->295          | 0.39834   |           |           |          |
| 281 ->295          | 0.36433   |           |           |          |
| Excited State 175: | Singlet-A | 3.6990 eV | 335.18 nm | f=0.0019 |
| 268 ->286          | 0.21018   |           |           |          |
| 268 ->287          | 0.31116   |           |           |          |
| 268 ->288          | 0.24999   |           |           |          |

|                    |           |           |           |          |
|--------------------|-----------|-----------|-----------|----------|
| 268 ->289          | 0.20219   |           |           |          |
| 268 ->291          | 0.19735   |           |           |          |
| 268 ->292          | -0.20198  |           |           |          |
| 269 ->287          | 0.10705   |           |           |          |
| 269 ->289          | 0.11192   |           |           |          |
| Excited State 176: | Singlet-A | 3.7037 eV | 334.76 nm | f=0.0081 |
| 268 ->287          | 0.10466   |           |           |          |
| 268 ->288          | 0.11489   |           |           |          |
| 276 ->298          | -0.11291  |           |           |          |
| 281 ->299          | -0.11907  |           |           |          |
| 281 ->300          | 0.10152   |           |           |          |
| 282 ->299          | 0.11834   |           |           |          |
| 283 ->298          | 0.10101   |           |           |          |
| 283 ->299          | 0.15331   |           |           |          |
| 283 ->300          | -0.12804  |           |           |          |
| 283 ->303          | 0.18952   |           |           |          |
| 283 ->305          | 0.11035   |           |           |          |
| 285 ->304          | -0.14317  |           |           |          |
| 285 ->310          | 0.16271   |           |           |          |
| Excited State 177: | Singlet-A | 3.7074 eV | 334.43 nm | f=0.0005 |
| 269 ->286          | -0.16796  |           |           |          |
| 269 ->287          | 0.13919   |           |           |          |
| 269 ->288          | -0.22511  |           |           |          |
| 269 ->289          | 0.14345   |           |           |          |
| 271 ->286          | 0.10284   |           |           |          |
| 271 ->287          | -0.11450  |           |           |          |
| 271 ->288          | 0.24265   |           |           |          |
| 271 ->290          | 0.26080   |           |           |          |
| 271 ->291          | -0.21632  |           |           |          |
| 271 ->292          | 0.10023   |           |           |          |
| 271 ->293          | 0.26868   |           |           |          |
| Excited State 178: | Singlet-A | 3.7135 eV | 333.88 nm | f=0.0003 |
| 274 ->294          | -0.12488  |           |           |          |
| 275 ->294          | -0.20605  |           |           |          |
| 276 ->294          | -0.31390  |           |           |          |
| 277 ->294          | 0.36602   |           |           |          |
| 279 ->294          | 0.42795   |           |           |          |
| Excited State 179: | Singlet-A | 3.7157 eV | 333.68 nm | f=0.0000 |
| 280 ->296          | -0.19769  |           |           |          |
| 281 ->296          | 0.21649   |           |           |          |

|                    |           |           |           |          |
|--------------------|-----------|-----------|-----------|----------|
| 282 ->296          | 0.62268   |           |           |          |
| 283 ->296          | -0.13900  |           |           |          |
| Excited State 180: | Singlet-A | 3.7207 eV | 333.22 nm | f=0.0083 |
| 273 ->295          | 0.12072   |           |           |          |
| 276 ->297          | 0.11387   |           |           |          |
| 277 ->297          | -0.11603  |           |           |          |
| 283 ->301          | 0.12238   |           |           |          |
| 284 ->300          | -0.20901  |           |           |          |
| 284 ->301          | 0.17973   |           |           |          |
| 284 ->302          | 0.11763   |           |           |          |
| 284 ->303          | 0.33232   |           |           |          |
| 284 ->307          | -0.16123  |           |           |          |
| Excited State 181: | Singlet-A | 3.7267 eV | 332.69 nm | f=0.0013 |
| 270 ->290          | -0.10483  |           |           |          |
| 272 ->291          | -0.10741  |           |           |          |
| 273 ->290          | 0.10655   |           |           |          |
| 273 ->292          | -0.10028  |           |           |          |
| 280 ->300          | -0.10857  |           |           |          |
| 281 ->300          | 0.13860   |           |           |          |
| 283 ->300          | 0.22651   |           |           |          |
| 283 ->301          | -0.13108  |           |           |          |
| 283 ->304          | -0.14189  |           |           |          |
| 283 ->306          | 0.13707   |           |           |          |
| 285 ->310          | 0.19439   |           |           |          |
| Excited State 182: | Singlet-A | 3.7290 eV | 332.48 nm | f=0.0009 |
| 270 ->290          | -0.21865  |           |           |          |
| 270 ->291          | -0.20575  |           |           |          |
| 270 ->292          | 0.17614   |           |           |          |
| 272 ->290          | -0.18948  |           |           |          |
| 272 ->291          | -0.15776  |           |           |          |
| 272 ->292          | 0.14432   |           |           |          |
| 273 ->290          | 0.22149   |           |           |          |
| 273 ->291          | 0.19995   |           |           |          |
| 273 ->292          | -0.18350  |           |           |          |
| 283 ->300          | -0.10064  |           |           |          |
| 283 ->301          | 0.10245   |           |           |          |
| Excited State 183: | Singlet-A | 3.7345 eV | 331.99 nm | f=0.0049 |
| 271 ->294          | 0.12477   |           |           |          |
| 280 ->300          | 0.14530   |           |           |          |
| 280 ->310          | -0.11146  |           |           |          |

|                    |           |           |           |          |
|--------------------|-----------|-----------|-----------|----------|
| 281 ->304          | 0.12683   |           |           |          |
| 281 ->310          | -0.14749  |           |           |          |
| 283 ->306          | -0.12753  |           |           |          |
| 285 ->304          | 0.17799   |           |           |          |
| 285 ->305          | -0.15313  |           |           |          |
| 285 ->310          | 0.31088   |           |           |          |
| Excited State 184: | Singlet-A | 3.7416 eV | 331.36 nm | f=0.0004 |
| 270 ->293          | -0.27984  |           |           |          |
| 271 ->293          | 0.15722   |           |           |          |
| 272 ->293          | -0.31777  |           |           |          |
| 273 ->293          | 0.36976   |           |           |          |
| 283 ->303          | 0.10658   |           |           |          |
| 283 ->305          | -0.10149  |           |           |          |
| Excited State 185: | Singlet-A | 3.7453 eV | 331.04 nm | f=0.0010 |
| 265 ->294          | 0.13179   |           |           |          |
| 269 ->294          | 0.10442   |           |           |          |
| 270 ->294          | 0.11443   |           |           |          |
| 271 ->294          | 0.47555   |           |           |          |
| 274 ->294          | 0.25648   |           |           |          |
| 275 ->294          | -0.11216  |           |           |          |
| 276 ->294          | -0.11022  |           |           |          |
| Excited State 186: | Singlet-A | 3.7488 eV | 330.73 nm | f=0.0008 |
| 270 ->293          | -0.12368  |           |           |          |
| 271 ->294          | -0.14433  |           |           |          |
| 272 ->293          | -0.13865  |           |           |          |
| 273 ->293          | 0.15524   |           |           |          |
| 277 ->298          | 0.10438   |           |           |          |
| 277 ->301          | 0.11659   |           |           |          |
| 283 ->302          | -0.16512  |           |           |          |
| 283 ->303          | -0.18830  |           |           |          |
| 283 ->304          | 0.12161   |           |           |          |
| 283 ->305          | 0.21794   |           |           |          |
| 284 ->300          | -0.12128  |           |           |          |
| 284 ->306          | -0.12883  |           |           |          |
| Excited State 187: | Singlet-A | 3.7522 eV | 330.43 nm | f=0.0007 |
| 269 ->289          | 0.20629   |           |           |          |
| 269 ->290          | 0.20072   |           |           |          |
| 269 ->292          | 0.35357   |           |           |          |
| 269 ->293          | -0.18995  |           |           |          |
| 270 ->292          | 0.13485   |           |           |          |



|                    |           |           |           |          |
|--------------------|-----------|-----------|-----------|----------|
| 271 ->289          | 0.10581   |           |           |          |
| 271 ->290          | 0.10427   |           |           |          |
| 271 ->292          | 0.23839   |           |           |          |
| 271 ->293          | -0.13216  |           |           |          |
| Excited State 188: | Singlet-A | 3.7614 eV | 329.62 nm | f=0.0017 |
| 274 ->296          | 0.10839   |           |           |          |
| 276 ->296          | 0.34992   |           |           |          |
| 277 ->296          | 0.45738   |           |           |          |
| 279 ->296          | -0.12779  |           |           |          |
| Excited State 189: | Singlet-A | 3.7648 eV | 329.33 nm | f=0.0003 |
| 276 ->296          | 0.18443   |           |           |          |
| 277 ->295          | -0.12965  |           |           |          |
| 277 ->296          | 0.23724   |           |           |          |
| 277 ->298          | -0.10346  |           |           |          |
| 277 ->301          | -0.13021  |           |           |          |
| 283 ->301          | -0.10257  |           |           |          |
| 283 ->303          | -0.12220  |           |           |          |
| 283 ->306          | -0.14548  |           |           |          |
| 284 ->300          | -0.12027  |           |           |          |
| 284 ->304          | 0.10462   |           |           |          |
| 284 ->306          | -0.19063  |           |           |          |
| Excited State 190: | Singlet-A | 3.7657 eV | 329.25 nm | f=0.0005 |
| 268 ->286          | 0.24511   |           |           |          |
| 268 ->287          | 0.38336   |           |           |          |
| 268 ->288          | -0.15452  |           |           |          |
| 268 ->289          | -0.12103  |           |           |          |
| 268 ->290          | 0.17325   |           |           |          |
| 268 ->291          | -0.15564  |           |           |          |
| 268 ->292          | 0.18039   |           |           |          |
| 268 ->293          | 0.13958   |           |           |          |
| 269 ->292          | 0.11262   |           |           |          |
| 271 ->291          | -0.11799  |           |           |          |
| Excited State 191: | Singlet-A | 3.7686 eV | 328.99 nm | f=0.0004 |
| 268 ->286          | 0.10090   |           |           |          |
| 268 ->287          | 0.13055   |           |           |          |
| 269 ->289          | 0.13229   |           |           |          |
| 269 ->291          | -0.14273  |           |           |          |
| 269 ->292          | -0.10942  |           |           |          |
| 271 ->289          | -0.20562  |           |           |          |
| 271 ->290          | -0.15598  |           |           |          |

|                    |           |           |           |          |
|--------------------|-----------|-----------|-----------|----------|
| 271 ->291          | 0.31326   |           |           |          |
| 271 ->292          | 0.22324   |           |           |          |
| 271 ->293          | 0.19638   |           |           |          |
| 280 ->297          | -0.11427  |           |           |          |
| 281 ->297          | -0.13341  |           |           |          |
| Excited State 192: | Singlet-A | 3.7688 eV | 328.98 nm | f=0.0002 |
| 280 ->297          | 0.42990   |           |           |          |
| 281 ->297          | 0.49872   |           |           |          |
| Excited State 193: | Singlet-A | 3.7782 eV | 328.16 nm | f=0.0016 |
| 271 ->291          | -0.10138  |           |           |          |
| 275 ->300          | -0.13990  |           |           |          |
| 276 ->300          | -0.17823  |           |           |          |
| 280 ->302          | 0.21935   |           |           |          |
| 281 ->300          | -0.12683  |           |           |          |
| 281 ->302          | -0.21636  |           |           |          |
| 282 ->302          | 0.16785   |           |           |          |
| 283 ->302          | 0.10814   |           |           |          |
| 283 ->306          | 0.15107   |           |           |          |
| Excited State 194: | Singlet-A | 3.7835 eV | 327.69 nm | f=0.0004 |
| 272 ->297          | 0.12076   |           |           |          |
| 273 ->297          | -0.15510  |           |           |          |
| 275 ->295          | -0.11643  |           |           |          |
| 276 ->295          | 0.33027   |           |           |          |
| 276 ->297          | 0.14003   |           |           |          |
| 277 ->295          | 0.42443   |           |           |          |
| Excited State 195: | Singlet-A | 3.7844 eV | 327.62 nm | f=0.0000 |
| 278 ->295          | 0.70341   |           |           |          |
| Excited State 196: | Singlet-A | 3.7863 eV | 327.45 nm | f=0.0000 |
| 269 ->286          | 0.14948   |           |           |          |
| 269 ->287          | -0.14114  |           |           |          |
| 269 ->288          | 0.25551   |           |           |          |
| 269 ->290          | 0.22930   |           |           |          |
| 269 ->291          | -0.24564  |           |           |          |
| 269 ->293          | 0.20031   |           |           |          |
| 271 ->288          | 0.13113   |           |           |          |
| 271 ->290          | 0.12099   |           |           |          |
| 271 ->293          | 0.16467   |           |           |          |
| Excited State 197: | Singlet-A | 3.7884 eV | 327.27 nm | f=0.0013 |

|                    |           |           |           |          |
|--------------------|-----------|-----------|-----------|----------|
| 270 ->297          | -0.13322  |           |           |          |
| 272 ->297          | -0.22320  |           |           |          |
| 273 ->297          | 0.28994   |           |           |          |
| 275 ->297          | 0.16910   |           |           |          |
| 276 ->295          | 0.14953   |           |           |          |
| 276 ->297          | -0.25668  |           |           |          |
| 277 ->295          | 0.24334   |           |           |          |
| 280 ->297          | -0.14497  |           |           |          |
| 282 ->312          | -0.10205  |           |           |          |
| Excited State 198: | Singlet-A | 3.7925 eV | 326.92 nm | f=0.0056 |
| 274 ->298          | -0.15051  |           |           |          |
| 274 ->299          | -0.13101  |           |           |          |
| 274 ->300          | 0.11403   |           |           |          |
| 274 ->302          | 0.11770   |           |           |          |
| 274 ->305          | 0.11533   |           |           |          |
| 280 ->299          | 0.10944   |           |           |          |
| 280 ->305          | -0.10979  |           |           |          |
| 281 ->298          | 0.22167   |           |           |          |
| 281 ->299          | 0.16992   |           |           |          |
| 281 ->300          | -0.12126  |           |           |          |
| 281 ->302          | -0.10059  |           |           |          |
| 285 ->300          | 0.12092   |           |           |          |
| 285 ->305          | 0.12182   |           |           |          |
| 285 ->310          | 0.10276   |           |           |          |
| Excited State 199: | Singlet-A | 3.7969 eV | 326.54 nm | f=0.0001 |
| 274 ->296          | 0.12229   |           |           |          |
| 275 ->296          | 0.13785   |           |           |          |
| 276 ->296          | 0.32988   |           |           |          |
| 277 ->296          | -0.12844  |           |           |          |
| 279 ->296          | 0.54550   |           |           |          |
| Excited State 200: | Singlet-A | 3.8053 eV | 325.82 nm | f=0.0058 |
| 277 ->303          | 0.11073   |           |           |          |
| 282 ->303          | 0.15936   |           |           |          |
| 282 ->311          | -0.16320  |           |           |          |
| 282 ->312          | 0.19225   |           |           |          |
| 283 ->303          | 0.17833   |           |           |          |
| 283 ->312          | -0.10413  |           |           |          |
| 284 ->300          | -0.10878  |           |           |          |
| 284 ->306          | -0.11851  |           |           |          |
| 284 ->312          | -0.13650  |           |           |          |

|                    |           |           |           |          |
|--------------------|-----------|-----------|-----------|----------|
| Excited State 201: | Singlet-A | 3.8073 eV | 325.65 nm | f=0.0074 |
| 276 ->297          | -0.10023  |           |           |          |
| 282 ->302          | 0.10082   |           |           |          |
| 282 ->311          | -0.15130  |           |           |          |
| 282 ->312          | 0.19411   |           |           |          |
| 283 ->300          | 0.11154   |           |           |          |
| 283 ->303          | -0.15378  |           |           |          |
| 284 ->303          | 0.10919   |           |           |          |
| 284 ->306          | 0.13156   |           |           |          |
| 284 ->311          | 0.12435   |           |           |          |
| 284 ->312          | -0.14879  |           |           |          |
| Excited State 202: | Singlet-A | 3.8126 eV | 325.20 nm | f=0.0115 |
| 268 ->293          | 0.14546   |           |           |          |
| 276 ->299          | 0.10872   |           |           |          |
| 276 ->301          | 0.10017   |           |           |          |
| 281 ->299          | 0.11432   |           |           |          |
| 281 ->302          | -0.13070  |           |           |          |
| 283 ->300          | 0.16710   |           |           |          |
| 283 ->307          | 0.19043   |           |           |          |
| Excited State 203: | Singlet-A | 3.8250 eV | 324.14 nm | f=0.0019 |
| 268 ->293          | 0.24084   |           |           |          |
| 275 ->294          | -0.18581  |           |           |          |
| 276 ->303          | 0.10387   |           |           |          |
| 277 ->299          | 0.12408   |           |           |          |
| 283 ->303          | -0.12257  |           |           |          |
| Excited State 204: | Singlet-A | 3.8274 eV | 323.94 nm | f=0.0008 |
| 272 ->294          | -0.20731  |           |           |          |
| 273 ->294          | -0.16295  |           |           |          |
| 274 ->294          | 0.14410   |           |           |          |
| 275 ->294          | 0.48301   |           |           |          |
| 276 ->294          | -0.21411  |           |           |          |
| 277 ->294          | 0.17678   |           |           |          |
| Excited State 205: | Singlet-A | 3.8305 eV | 323.67 nm | f=0.0005 |
| 274 ->296          | -0.11733  |           |           |          |
| 275 ->296          | -0.20095  |           |           |          |
| 276 ->296          | -0.29448  |           |           |          |
| 277 ->296          | 0.33846   |           |           |          |
| 279 ->296          | 0.36534   |           |           |          |
| Excited State 206: | Singlet-A | 3.8321 eV | 323.54 nm | f=0.0016 |

|                    |           |           |           |          |
|--------------------|-----------|-----------|-----------|----------|
| 268 ->289          | 0.12279   |           |           |          |
| 268 ->293          | 0.42141   |           |           |          |
| 280 ->304          | -0.12054  |           |           |          |
| Excited State 207: | Singlet-A | 3.8355 eV | 323.26 nm | f=0.0026 |
| 268 ->293          | 0.24262   |           |           |          |
| 276 ->296          | -0.12369  |           |           |          |
| 277 ->296          | 0.12416   |           |           |          |
| 279 ->296          | 0.10905   |           |           |          |
| 280 ->310          | -0.11506  |           |           |          |
| 281 ->310          | -0.11005  |           |           |          |
| 283 ->307          | -0.11323  |           |           |          |
| 285 ->309          | -0.15131  |           |           |          |
| 285 ->310          | -0.12987  |           |           |          |
| 285 ->311          | -0.14407  |           |           |          |
| 285 ->312          | -0.10299  |           |           |          |
| 285 ->313          | -0.14700  |           |           |          |
| Excited State 208: | Singlet-A | 3.8438 eV | 322.56 nm | f=0.0035 |
| 269 ->289          | -0.19747  |           |           |          |
| 269 ->290          | -0.11934  |           |           |          |
| 269 ->291          | 0.22493   |           |           |          |
| 269 ->292          | 0.12763   |           |           |          |
| 269 ->293          | 0.16271   |           |           |          |
| 271 ->291          | 0.10111   |           |           |          |
| 277 ->298          | -0.12466  |           |           |          |
| Excited State 209: | Singlet-A | 3.8460 eV | 322.37 nm | f=0.0000 |
| 268 ->290          | -0.15850  |           |           |          |
| 269 ->289          | 0.10480   |           |           |          |
| 269 ->291          | -0.17982  |           |           |          |
| 269 ->292          | -0.10681  |           |           |          |
| 280 ->299          | -0.10084  |           |           |          |
| 282 ->298          | -0.22127  |           |           |          |
| 282 ->299          | 0.22536   |           |           |          |
| 282 ->301          | 0.13800   |           |           |          |
| 282 ->314          | -0.10344  |           |           |          |
| Excited State 210: | Singlet-A | 3.8472 eV | 322.27 nm | f=0.0021 |
| 268 ->290          | 0.14117   |           |           |          |
| 268 ->292          | -0.11195  |           |           |          |
| 269 ->289          | -0.11674  |           |           |          |
| 269 ->291          | 0.17722   |           |           |          |
| 269 ->292          | 0.10428   |           |           |          |

|                    |           |           |           |          |
|--------------------|-----------|-----------|-----------|----------|
| 269 ->293          | 0.10809   |           |           |          |
| 282 ->298          | -0.22620  |           |           |          |
| 282 ->299          | 0.24113   |           |           |          |
| 282 ->301          | 0.16996   |           |           |          |
| 282 ->314          | -0.10045  |           |           |          |
| Excited State 211: | Singlet-A | 3.8475 eV | 322.24 nm | f=0.0014 |
| 268 ->288          | -0.14291  |           |           |          |
| 268 ->289          | -0.14462  |           |           |          |
| 268 ->290          | 0.34426   |           |           |          |
| 268 ->291          | 0.28821   |           |           |          |
| 268 ->292          | -0.18472  |           |           |          |
| 269 ->290          | 0.12874   |           |           |          |
| 269 ->292          | -0.16448  |           |           |          |
| Excited State 212: | Singlet-A | 3.8521 eV | 321.87 nm | f=0.0074 |
| 278 ->298          | 0.13077   |           |           |          |
| 278 ->299          | 0.10543   |           |           |          |
| 278 ->309          | 0.10468   |           |           |          |
| 278 ->310          | 0.19299   |           |           |          |
| 280 ->304          | -0.13063  |           |           |          |
| 281 ->309          | 0.10088   |           |           |          |
| 281 ->310          | 0.10862   |           |           |          |
| 285 ->298          | -0.15766  |           |           |          |
| 285 ->299          | 0.10570   |           |           |          |
| 285 ->304          | -0.12439  |           |           |          |
| 285 ->310          | 0.11334   |           |           |          |
| 285 ->311          | -0.12011  |           |           |          |
| 285 ->313          | 0.17075   |           |           |          |
| 285 ->314          | 0.11249   |           |           |          |
| Excited State 213: | Singlet-A | 3.8565 eV | 321.50 nm | f=0.0039 |
| 268 ->290          | -0.13052  |           |           |          |
| 268 ->291          | -0.11252  |           |           |          |
| 268 ->292          | 0.11042   |           |           |          |
| 270 ->295          | -0.11292  |           |           |          |
| 272 ->295          | 0.18705   |           |           |          |
| 275 ->295          | 0.35286   |           |           |          |
| 276 ->295          | 0.25472   |           |           |          |
| Excited State 214: | Singlet-A | 3.8585 eV | 321.33 nm | f=0.0059 |
| 272 ->295          | 0.15147   |           |           |          |
| 275 ->295          | 0.26211   |           |           |          |
| 276 ->295          | 0.20493   |           |           |          |

|                    |           |           |           |          |
|--------------------|-----------|-----------|-----------|----------|
| 277 ->298          | 0.10214   |           |           |          |
| 281 ->304          | -0.10081  |           |           |          |
| 283 ->307          | -0.13438  |           |           |          |
| 283 ->308          | -0.10223  |           |           |          |
| Excited State 215: | Singlet-A | 3.8616 eV | 321.07 nm | f=0.0007 |
| 269 ->294          | 0.11708   |           |           |          |
| 272 ->294          | 0.10734   |           |           |          |
| 273 ->294          | 0.17768   |           |           |          |
| 275 ->294          | 0.12573   |           |           |          |
| 275 ->295          | -0.18122  |           |           |          |
| 276 ->295          | -0.12274  |           |           |          |
| 276 ->297          | 0.21585   |           |           |          |
| 277 ->297          | 0.29307   |           |           |          |
| Excited State 216: | Singlet-A | 3.8624 eV | 321.00 nm | f=0.0001 |
| 278 ->297          | 0.69165   |           |           |          |
| Excited State 217: | Singlet-A | 3.8638 eV | 320.89 nm | f=0.0006 |
| 269 ->294          | 0.23203   |           |           |          |
| 270 ->294          | 0.13173   |           |           |          |
| 272 ->294          | 0.20108   |           |           |          |
| 273 ->294          | 0.32877   |           |           |          |
| 275 ->294          | 0.19597   |           |           |          |
| 276 ->297          | -0.18367  |           |           |          |
| 277 ->297          | -0.25033  |           |           |          |
| Excited State 218: | Singlet-A | 3.8661 eV | 320.70 nm | f=0.0002 |
| 273 ->294          | 0.11569   |           |           |          |
| 276 ->297          | 0.21942   |           |           |          |
| 276 ->299          | -0.11446  |           |           |          |
| 277 ->297          | 0.28446   |           |           |          |
| 280 ->305          | -0.11003  |           |           |          |
| 283 ->302          | -0.10618  |           |           |          |
| 283 ->303          | 0.10325   |           |           |          |
| 285 ->299          | 0.12372   |           |           |          |
| Excited State 219: | Singlet-A | 3.8737 eV | 320.07 nm | f=0.0058 |
| 268 ->293          | 0.10218   |           |           |          |
| 277 ->304          | -0.12159  |           |           |          |
| 277 ->307          | 0.11474   |           |           |          |
| 280 ->304          | 0.16322   |           |           |          |
| 280 ->305          | -0.11319  |           |           |          |
| 282 ->304          | 0.10693   |           |           |          |

|                    |           |           |           |          |
|--------------------|-----------|-----------|-----------|----------|
| 283 ->304          | 0.14699   |           |           |          |
| 283 ->306          | -0.11591  |           |           |          |
| 283 ->307          | 0.12914   |           |           |          |
| 285 ->300          | 0.10734   |           |           |          |
| Excited State 220: | Singlet-A | 3.8805 eV | 319.51 nm | f=0.0059 |
| 274 ->300          | -0.10154  |           |           |          |
| 275 ->300          | -0.14105  |           |           |          |
| 280 ->300          | 0.11946   |           |           |          |
| 280 ->304          | 0.19433   |           |           |          |
| 280 ->308          | 0.10632   |           |           |          |
| 281 ->308          | -0.13113  |           |           |          |
| 283 ->306          | 0.21806   |           |           |          |
| 285 ->300          | 0.10483   |           |           |          |
| Excited State 221: | Singlet-A | 3.8839 eV | 319.22 nm | f=0.0017 |
| 271 ->296          | 0.18489   |           |           |          |
| 274 ->296          | 0.10314   |           |           |          |
| 276 ->305          | 0.11590   |           |           |          |
| 277 ->300          | -0.10681  |           |           |          |
| 278 ->310          | -0.15641  |           |           |          |
| 285 ->298          | -0.24529  |           |           |          |
| 285 ->299          | 0.25666   |           |           |          |
| 285 ->301          | -0.11052  |           |           |          |
| 285 ->304          | -0.11678  |           |           |          |
| Excited State 222: | Singlet-A | 3.8885 eV | 318.85 nm | f=0.0023 |
| 271 ->296          | 0.38966   |           |           |          |
| 274 ->296          | 0.21122   |           |           |          |
| 285 ->299          | -0.10521  |           |           |          |
| 285 ->300          | -0.14968  |           |           |          |
| 285 ->302          | 0.10879   |           |           |          |
| Excited State 223: | Singlet-A | 3.8956 eV | 318.26 nm | f=0.0039 |
| 279 ->298          | -0.16471  |           |           |          |
| 279 ->299          | 0.17253   |           |           |          |
| 279 ->301          | 0.15859   |           |           |          |
| 279 ->314          | -0.11254  |           |           |          |
| 279 ->315          | 0.12499   |           |           |          |
| 284 ->311          | -0.28162  |           |           |          |
| 284 ->312          | 0.29139   |           |           |          |
| 284 ->316          | 0.12911   |           |           |          |
| Excited State 224: | Singlet-A | 3.9008 eV | 317.85 nm | f=0.0006 |



|           |          |
|-----------|----------|
| 271 ->296 | 0.17849  |
| 279 ->298 | -0.12796 |
| 279 ->299 | 0.13124  |
| 279 ->301 | 0.14111  |
| 279 ->314 | -0.10669 |
| 279 ->315 | 0.10542  |
| 280 ->302 | -0.12302 |
| 281 ->298 | -0.10317 |
| 283 ->302 | -0.11993 |
| 284 ->298 | -0.10409 |
| 285 ->298 | 0.14277  |
| 285 ->300 | 0.11359  |

Excited State 225: Singlet-A 3.9013 eV 317.81 nm f=0.0038

|           |          |
|-----------|----------|
| 279 ->298 | -0.16462 |
| 279 ->299 | 0.16455  |
| 279 ->301 | 0.12344  |
| 279 ->314 | -0.13386 |
| 279 ->315 | 0.11388  |
| 282 ->311 | 0.10034  |
| 282 ->312 | -0.10981 |
| 284 ->311 | 0.20965  |
| 284 ->312 | -0.18154 |
| 284 ->314 | 0.11029  |
| 284 ->316 | -0.14199 |
| 285 ->298 | -0.10385 |

Excited State 226: Singlet-A 3.9083 eV 317.23 nm f=0.0190

|           |          |
|-----------|----------|
| 276 ->300 | -0.12725 |
| 277 ->303 | -0.14384 |
| 277 ->305 | -0.12133 |
| 280 ->298 | 0.10460  |
| 280 ->307 | -0.14247 |
| 283 ->300 | 0.10369  |
| 283 ->306 | -0.13458 |
| 283 ->307 | 0.14647  |
| 283 ->308 | 0.12177  |
| 285 ->298 | 0.12486  |
| 285 ->300 | 0.12893  |

Excited State 227: Singlet-A 3.9136 eV 316.81 nm f=0.0087

|           |          |
|-----------|----------|
| 274 ->300 | -0.10987 |
| 274 ->302 | -0.14328 |
| 276 ->308 | -0.11784 |

|                    |           |           |           |          |
|--------------------|-----------|-----------|-----------|----------|
| 277 ->300          | -0.12976  |           |           |          |
| 280 ->298          | 0.14529   |           |           |          |
| 280 ->300          | 0.12758   |           |           |          |
| 280 ->302          | 0.17727   |           |           |          |
| 280 ->305          | 0.11360   |           |           |          |
| 281 ->299          | 0.13479   |           |           |          |
| 281 ->300          | 0.10444   |           |           |          |
| 283 ->305          | 0.10159   |           |           |          |
| Excited State 228: | Singlet-A | 3.9176 eV | 316.48 nm | f=0.0019 |
| 276 ->298          | -0.20251  |           |           |          |
| 277 ->298          | -0.13197  |           |           |          |
| 277 ->300          | 0.10272   |           |           |          |
| 277 ->304          | -0.10566  |           |           |          |
| 277 ->305          | -0.12754  |           |           |          |
| 280 ->308          | 0.13174   |           |           |          |
| 283 ->308          | 0.11389   |           |           |          |
| 285 ->298          | -0.18530  |           |           |          |
| 285 ->299          | 0.24987   |           |           |          |
| Excited State 229: | Singlet-A | 3.9290 eV | 315.56 nm | f=0.0030 |
| 276 ->300          | 0.12987   |           |           |          |
| 280 ->313          | 0.16528   |           |           |          |
| 281 ->313          | 0.18435   |           |           |          |
| 285 ->300          | 0.14320   |           |           |          |
| 285 ->302          | -0.14627  |           |           |          |
| 285 ->304          | -0.11136  |           |           |          |
| 285 ->310          | -0.12079  |           |           |          |
| 285 ->313          | 0.22154   |           |           |          |
| Excited State 230: | Singlet-A | 3.9320 eV | 315.32 nm | f=0.0091 |
| 280 ->313          | -0.16059  |           |           |          |
| 281 ->304          | -0.10526  |           |           |          |
| 281 ->313          | -0.18155  |           |           |          |
| 285 ->298          | 0.10407   |           |           |          |
| 285 ->300          | 0.26039   |           |           |          |
| 285 ->302          | -0.13531  |           |           |          |
| 285 ->304          | -0.15991  |           |           |          |
| 285 ->306          | -0.10292  |           |           |          |
| 285 ->311          | -0.12279  |           |           |          |
| 285 ->313          | -0.24759  |           |           |          |
| Excited State 231: | Singlet-A | 3.9386 eV | 314.79 nm | f=0.0008 |
| 270 ->297          | -0.14792  |           |           |          |

|                    |           |           |           |          |
|--------------------|-----------|-----------|-----------|----------|
| 272 ->297          | 0.24303   |           |           |          |
| 275 ->297          | 0.46266   |           |           |          |
| 276 ->297          | 0.31868   |           |           |          |
| Excited State 232: | Singlet-A | 3.9446 eV | 314.31 nm | f=0.0008 |
| 266 ->295          | 0.13125   |           |           |          |
| 268 ->295          | 0.20065   |           |           |          |
| 270 ->295          | 0.32050   |           |           |          |
| 272 ->295          | -0.17865  |           |           |          |
| 275 ->295          | 0.19273   |           |           |          |
| 284 ->298          | 0.22832   |           |           |          |
| 284 ->299          | 0.10288   |           |           |          |
| 284 ->301          | 0.13656   |           |           |          |
| 284 ->305          | 0.11519   |           |           |          |
| Excited State 233: | Singlet-A | 3.9471 eV | 314.11 nm | f=0.0003 |
| 272 ->296          | -0.19058  |           |           |          |
| 273 ->296          | -0.13366  |           |           |          |
| 274 ->296          | 0.13921   |           |           |          |
| 275 ->296          | 0.52653   |           |           |          |
| 276 ->296          | -0.22433  |           |           |          |
| 277 ->296          | 0.17567   |           |           |          |
| Excited State 234: | Singlet-A | 3.9490 eV | 313.97 nm | f=0.0011 |
| 278 ->310          | -0.12271  |           |           |          |
| 278 ->313          | 0.18172   |           |           |          |
| 280 ->311          | -0.12305  |           |           |          |
| 281 ->311          | -0.14408  |           |           |          |
| 281 ->312          | -0.11081  |           |           |          |
| 284 ->298          | -0.14675  |           |           |          |
| 284 ->301          | -0.13831  |           |           |          |
| 285 ->299          | -0.10628  |           |           |          |
| 285 ->305          | -0.12411  |           |           |          |
| 285 ->311          | -0.10403  |           |           |          |
| 285 ->313          | 0.14991   |           |           |          |
| Excited State 235: | Singlet-A | 3.9501 eV | 313.88 nm | f=0.0012 |
| 268 ->295          | -0.13838  |           |           |          |
| 270 ->295          | -0.23438  |           |           |          |
| 272 ->295          | 0.14909   |           |           |          |
| 275 ->295          | -0.15024  |           |           |          |
| 284 ->298          | 0.28193   |           |           |          |
| 284 ->301          | 0.24723   |           |           |          |
| 284 ->303          | -0.12796  |           |           |          |

|                    |           |           |           |          |
|--------------------|-----------|-----------|-----------|----------|
| 284 ->306          | -0.12434  |           |           |          |
| Excited State 236: | Singlet-A | 3.9634 eV | 312.82 nm | f=0.0014 |
| 276 ->298          | -0.10864  |           |           |          |
| 279 ->298          | 0.10014   |           |           |          |
| 279 ->299          | -0.13272  |           |           |          |
| 279 ->303          | 0.14647   |           |           |          |
| 279 ->311          | -0.12553  |           |           |          |
| 279 ->312          | 0.13396   |           |           |          |
| 282 ->298          | 0.12158   |           |           |          |
| 282 ->299          | -0.12475  |           |           |          |
| 284 ->298          | 0.11703   |           |           |          |
| 284 ->315          | -0.10390  |           |           |          |
| Excited State 237: | Singlet-A | 3.9681 eV | 312.46 nm | f=0.0232 |
| 275 ->297          | 0.11964   |           |           |          |
| 276 ->302          | 0.18237   |           |           |          |
| 277 ->298          | 0.17987   |           |           |          |
| 277 ->299          | 0.10252   |           |           |          |
| 277 ->305          | 0.12626   |           |           |          |
| 283 ->299          | 0.12109   |           |           |          |
| 283 ->302          | 0.11290   |           |           |          |
| 283 ->308          | 0.10920   |           |           |          |
| Excited State 238: | Singlet-A | 3.9709 eV | 312.23 nm | f=0.0086 |
| 279 ->311          | -0.11071  |           |           |          |
| 279 ->312          | 0.11829   |           |           |          |
| 280 ->309          | -0.10445  |           |           |          |
| 280 ->310          | 0.12243   |           |           |          |
| 282 ->298          | 0.10628   |           |           |          |
| 283 ->299          | 0.12153   |           |           |          |
| Excited State 239: | Singlet-A | 3.9749 eV | 311.92 nm | f=0.0106 |
| 275 ->300          | -0.10924  |           |           |          |
| 275 ->301          | 0.11127   |           |           |          |
| 275 ->303          | 0.12512   |           |           |          |
| 276 ->301          | -0.13203  |           |           |          |
| 276 ->303          | -0.15897  |           |           |          |
| 277 ->300          | -0.14288  |           |           |          |
| 277 ->301          | 0.10674   |           |           |          |
| 277 ->303          | 0.12803   |           |           |          |
| 279 ->311          | -0.11530  |           |           |          |
| 279 ->312          | 0.12378   |           |           |          |
| 284 ->299          | 0.16889   |           |           |          |

|                    |           |           |           |          |
|--------------------|-----------|-----------|-----------|----------|
| Excited State 240: | Singlet-A | 3.9811 eV | 311.44 nm | f=0.0025 |
| 271 ->296          | 0.16388   |           |           |          |
| 272 ->296          | -0.10116  |           |           |          |
| 273 ->296          | -0.16891  |           |           |          |
| 278 ->298          | 0.33747   |           |           |          |
| 278 ->299          | 0.27084   |           |           |          |
| 285 ->305          | 0.13060   |           |           |          |
| 285 ->313          | -0.14994  |           |           |          |
| Excited State 241: | Singlet-A | 3.9831 eV | 311.28 nm | f=0.0043 |
| 270 ->295          | 0.10614   |           |           |          |
| 272 ->295          | -0.10210  |           |           |          |
| 282 ->315          | 0.11954   |           |           |          |
| 282 ->316          | -0.17957  |           |           |          |
| 284 ->299          | -0.24791  |           |           |          |
| 284 ->301          | 0.28034   |           |           |          |
| 284 ->303          | -0.25651  |           |           |          |
| 284 ->305          | -0.17373  |           |           |          |
| 284 ->315          | 0.15023   |           |           |          |
| 284 ->316          | -0.13944  |           |           |          |
| Excited State 242: | Singlet-A | 3.9875 eV | 310.93 nm | f=0.0008 |
| 274 ->304          | -0.13126  |           |           |          |
| 274 ->305          | 0.12157   |           |           |          |
| 277 ->302          | -0.12397  |           |           |          |
| 281 ->304          | 0.16089   |           |           |          |
| 281 ->305          | -0.14066  |           |           |          |
| 281 ->310          | 0.10451   |           |           |          |
| 283 ->298          | -0.11593  |           |           |          |
| 283 ->299          | -0.11674  |           |           |          |
| 283 ->305          | 0.11104   |           |           |          |
| Excited State 243: | Singlet-A | 3.9925 eV | 310.54 nm | f=0.0016 |
| 269 ->296          | 0.25615   |           |           |          |
| 270 ->296          | 0.16671   |           |           |          |
| 272 ->296          | 0.24632   |           |           |          |
| 273 ->296          | 0.38957   |           |           |          |
| 275 ->296          | 0.19782   |           |           |          |
| 278 ->298          | 0.12829   |           |           |          |
| 278 ->299          | 0.10745   |           |           |          |
| 285 ->313          | -0.11358  |           |           |          |
| Excited State 244: | Singlet-A | 3.9981 eV | 310.11 nm | f=0.0014 |

|           |          |
|-----------|----------|
| 266 ->295 | 0.12470  |
| 272 ->295 | 0.13767  |
| 274 ->295 | -0.14285 |
| 279 ->298 | 0.15836  |
| 279 ->299 | -0.15385 |
| 279 ->316 | 0.12379  |
| 282 ->298 | -0.15397 |
| 282 ->299 | 0.11960  |
| 282 ->300 | 0.15698  |
| 282 ->301 | -0.11754 |
| 282 ->304 | -0.11282 |
| 282 ->306 | 0.14166  |
| 282 ->312 | 0.10986  |
| 282 ->314 | 0.20216  |
| 282 ->316 | -0.11654 |
| 284 ->314 | 0.10208  |

Excited State 245: Singlet-A 4.0030 eV 309.73 nm f=0.0089

|           |          |
|-----------|----------|
| 269 ->294 | 0.26293  |
| 271 ->294 | -0.11118 |
| 272 ->294 | -0.16849 |
| 273 ->296 | 0.10352  |
| 274 ->298 | -0.11718 |
| 276 ->300 | 0.11184  |
| 277 ->302 | -0.10023 |
| 277 ->307 | -0.10214 |
| 285 ->308 | 0.11609  |

Excited State 246: Singlet-A 4.0052 eV 309.56 nm f=0.0066

|           |          |
|-----------|----------|
| 269 ->294 | 0.34485  |
| 271 ->294 | -0.10658 |
| 272 ->294 | -0.15551 |
| 273 ->294 | -0.10249 |
| 276 ->302 | 0.10328  |
| 277 ->302 | 0.10011  |
| 278 ->298 | -0.10577 |
| 285 ->308 | -0.10094 |

Excited State 247: Singlet-A 4.0087 eV 309.29 nm f=0.0007

|           |          |
|-----------|----------|
| 270 ->295 | -0.26826 |
| 272 ->295 | -0.18875 |
| 273 ->295 | -0.21819 |
| 274 ->295 | 0.51519  |

|                    |           |           |           |          |
|--------------------|-----------|-----------|-----------|----------|
| Excited State 248: | Singlet-A | 4.0089 eV | 309.27 nm | f=0.0049 |
| 265 ->294          | 0.10115   |           |           |          |
| 274 ->298          | -0.11484  |           |           |          |
| 278 ->305          | 0.10463   |           |           |          |
| 278 ->309          | 0.13767   |           |           |          |
| 278 ->310          | 0.10253   |           |           |          |
| 278 ->311          | 0.17320   |           |           |          |
| 278 ->312          | 0.14041   |           |           |          |
| 278 ->314          | -0.15351  |           |           |          |
| 278 ->315          | -0.13063  |           |           |          |
| 285 ->313          | 0.17626   |           |           |          |
| Excited State 249: | Singlet-A | 4.0123 eV | 309.01 nm | f=0.0040 |
| 269 ->294          | 0.28327   |           |           |          |
| 272 ->294          | -0.14647  |           |           |          |
| 276 ->300          | -0.10303  |           |           |          |
| 276 ->303          | -0.10978  |           |           |          |
| 276 ->304          | 0.12059   |           |           |          |
| 278 ->311          | 0.12170   |           |           |          |
| 278 ->314          | -0.11379  |           |           |          |
| Excited State 250: | Singlet-A | 4.0141 eV | 308.87 nm | f=0.0016 |
| 269 ->294          | -0.13543  |           |           |          |
| 274 ->299          | 0.11692   |           |           |          |
| 276 ->300          | 0.12564   |           |           |          |
| 276 ->304          | -0.10939  |           |           |          |
| 278 ->299          | -0.10154  |           |           |          |
| 278 ->311          | 0.15736   |           |           |          |
| 278 ->312          | 0.12382   |           |           |          |
| 278 ->314          | -0.12916  |           |           |          |
| 278 ->315          | -0.10947  |           |           |          |
| 280 ->298          | 0.10021   |           |           |          |
| 281 ->313          | 0.10874   |           |           |          |
| Excited State 251: | Singlet-A | 4.0150 eV | 308.80 nm | f=0.0028 |
| 265 ->287          | -0.11189  |           |           |          |
| 281 ->305          | -0.10705  |           |           |          |
| 283 ->298          | 0.15455   |           |           |          |
| 283 ->299          | 0.15774   |           |           |          |
| 283 ->300          | -0.13797  |           |           |          |
| 283 ->304          | -0.14765  |           |           |          |
| 283 ->305          | -0.13590  |           |           |          |
| Excited State 252: | Singlet-A | 4.0188 eV | 308.51 nm | f=0.0027 |

|                    |           |           |           |          |
|--------------------|-----------|-----------|-----------|----------|
| 263 ->286          | 0.10597   |           |           |          |
| 267 ->286          | -0.15779  |           |           |          |
| 267 ->287          | 0.11935   |           |           |          |
| 270 ->297          | -0.10767  |           |           |          |
| 282 ->301          | 0.11131   |           |           |          |
| 282 ->316          | -0.12605  |           |           |          |
| 284 ->299          | 0.19131   |           |           |          |
| 284 ->315          | 0.10382   |           |           |          |
| 285 ->301          | -0.11321  |           |           |          |
| Excited State 253: | Singlet-A | 4.0205 eV | 308.38 nm | f=0.0042 |
| 266 ->295          | -0.10122  |           |           |          |
| 267 ->286          | 0.16501   |           |           |          |
| 267 ->287          | -0.12945  |           |           |          |
| 270 ->297          | -0.14121  |           |           |          |
| 282 ->315          | 0.10563   |           |           |          |
| 282 ->316          | -0.15490  |           |           |          |
| 284 ->301          | -0.12401  |           |           |          |
| 285 ->301          | 0.12729   |           |           |          |
| Excited State 254: | Singlet-A | 4.0260 eV | 307.96 nm | f=0.0118 |
| 280 ->298          | 0.15972   |           |           |          |
| 280 ->299          | -0.16442  |           |           |          |
| 280 ->301          | -0.12985  |           |           |          |
| 280 ->303          | 0.10189   |           |           |          |
| 281 ->298          | -0.13549  |           |           |          |
| 281 ->299          | 0.13695   |           |           |          |
| 281 ->301          | 0.12756   |           |           |          |
| 283 ->299          | -0.10271  |           |           |          |
| 285 ->301          | 0.22939   |           |           |          |
| Excited State 255: | Singlet-A | 4.0307 eV | 307.60 nm | f=0.0001 |
| 269 ->294          | 0.13049   |           |           |          |
| 270 ->294          | -0.28166  |           |           |          |
| 272 ->294          | 0.48520   |           |           |          |
| 273 ->294          | -0.33405  |           |           |          |
| 275 ->294          | 0.10512   |           |           |          |
| Excited State 256: | Singlet-A | 4.0370 eV | 307.12 nm | f=0.0006 |
| 266 ->295          | -0.13616  |           |           |          |
| 268 ->297          | 0.18665   |           |           |          |
| 270 ->297          | 0.33432   |           |           |          |
| 272 ->297          | -0.20767  |           |           |          |
| 273 ->297          | -0.10669  |           |           |          |



|                    |           |           |           |          |
|--------------------|-----------|-----------|-----------|----------|
| 275 ->297          | 0.19437   |           |           |          |
| 284 ->299          | 0.12070   |           |           |          |
| 284 ->301          | -0.11083  |           |           |          |
| 284 ->316          | -0.17768  |           |           |          |
| Excited State 257: | Singlet-A | 4.0424 eV | 306.71 nm | f=0.0018 |
| 270 ->297          | 0.13126   |           |           |          |
| 276 ->298          | 0.15617   |           |           |          |
| 280 ->299          | 0.10539   |           |           |          |
| 281 ->299          | -0.10628  |           |           |          |
| 282 ->299          | 0.10268   |           |           |          |
| 285 ->299          | 0.15230   |           |           |          |
| 285 ->301          | 0.18245   |           |           |          |
| 285 ->304          | 0.10981   |           |           |          |
| 285 ->305          | 0.13747   |           |           |          |
| 285 ->306          | 0.14831   |           |           |          |
| 285 ->308          | 0.14952   |           |           |          |
| Excited State 258: | Singlet-A | 4.0454 eV | 306.48 nm | f=0.0009 |
| 280 ->301          | -0.10888  |           |           |          |
| 281 ->300          | 0.10011   |           |           |          |
| 281 ->301          | 0.11061   |           |           |          |
| 282 ->298          | 0.28643   |           |           |          |
| 282 ->299          | 0.15502   |           |           |          |
| 282 ->300          | 0.23903   |           |           |          |
| 282 ->301          | 0.27205   |           |           |          |
| 283 ->300          | -0.10354  |           |           |          |
| Excited State 259: | Singlet-A | 4.0484 eV | 306.26 nm | f=0.0001 |
| 270 ->295          | 0.25618   |           |           |          |
| 272 ->295          | 0.29078   |           |           |          |
| 273 ->295          | 0.35776   |           |           |          |
| 274 ->295          | 0.40391   |           |           |          |
| 275 ->295          | -0.10709  |           |           |          |
| Excited State 260: | Singlet-A | 4.0523 eV | 305.96 nm | f=0.0075 |
| 265 ->286          | 0.13653   |           |           |          |
| 265 ->287          | 0.17928   |           |           |          |
| 279 ->301          | 0.10139   |           |           |          |
| 282 ->301          | -0.12116  |           |           |          |
| 284 ->314          | -0.13673  |           |           |          |
| 284 ->315          | 0.12142   |           |           |          |
| 285 ->301          | 0.18138   |           |           |          |

|                    |           |           |           |          |
|--------------------|-----------|-----------|-----------|----------|
| Excited State 261: | Singlet-A | 4.0542 eV | 305.82 nm | f=0.0074 |
| 257 ->287          | 0.10628   |           |           |          |
| 265 ->286          | 0.14804   |           |           |          |
| 265 ->287          | 0.20587   |           |           |          |
| 281 ->300          | 0.10809   |           |           |          |
| 285 ->302          | -0.10058  |           |           |          |
| Excited State 262: | Singlet-A | 4.0585 eV | 305.49 nm | f=0.0057 |
| 276 ->307          | 0.10389   |           |           |          |
| 276 ->309          | 0.12197   |           |           |          |
| 284 ->314          | 0.10422   |           |           |          |
| 285 ->299          | 0.11621   |           |           |          |
| 285 ->301          | 0.28131   |           |           |          |
| 285 ->303          | 0.12475   |           |           |          |
| 285 ->309          | -0.10358  |           |           |          |
| Excited State 263: | Singlet-A | 4.0627 eV | 305.18 nm | f=0.0038 |
| 267 ->286          | 0.14106   |           |           |          |
| 267 ->287          | -0.10526  |           |           |          |
| 276 ->298          | -0.11036  |           |           |          |
| 276 ->307          | 0.12927   |           |           |          |
| 277 ->307          | -0.12172  |           |           |          |
| 279 ->306          | -0.12040  |           |           |          |
| 282 ->298          | 0.11578   |           |           |          |
| 283 ->304          | -0.10163  |           |           |          |
| Excited State 264: | Singlet-A | 4.0681 eV | 304.77 nm | f=0.0002 |
| 270 ->294          | 0.53128   |           |           |          |
| 271 ->294          | -0.16375  |           |           |          |
| 272 ->294          | 0.15656   |           |           |          |
| 273 ->294          | -0.28420  |           |           |          |
| Excited State 265: | Singlet-A | 4.0696 eV | 304.66 nm | f=0.0075 |
| 284 ->298          | -0.16736  |           |           |          |
| 284 ->299          | -0.12177  |           |           |          |
| 284 ->300          | 0.28566   |           |           |          |
| 284 ->303          | 0.19524   |           |           |          |
| 284 ->305          | 0.11586   |           |           |          |
| 284 ->306          | -0.11345  |           |           |          |
| 284 ->307          | 0.11040   |           |           |          |
| 285 ->301          | 0.20238   |           |           |          |
| 285 ->305          | -0.13726  |           |           |          |
| Excited State 266: | Singlet-A | 4.0716 eV | 304.51 nm | f=0.0049 |

|                    |           |           |           |          |
|--------------------|-----------|-----------|-----------|----------|
| 270 ->294          | -0.12608  |           |           |          |
| 278 ->298          | 0.12315   |           |           |          |
| 278 ->313          | -0.17626  |           |           |          |
| 284 ->300          | -0.15346  |           |           |          |
| 284 ->303          | -0.12346  |           |           |          |
| 285 ->301          | 0.22557   |           |           |          |
| 285 ->305          | -0.22311  |           |           |          |
| Excited State 267: | Singlet-A | 4.0738 eV | 304.35 nm | f=0.0070 |
| 265 ->294          | -0.10526  |           |           |          |
| 270 ->294          | 0.13001   |           |           |          |
| 278 ->313          | -0.17217  |           |           |          |
| 285 ->301          | -0.10847  |           |           |          |
| 285 ->302          | 0.11445   |           |           |          |
| 285 ->303          | 0.15829   |           |           |          |
| 285 ->308          | 0.24720   |           |           |          |
| 285 ->309          | -0.10479  |           |           |          |
| Excited State 268: | Singlet-A | 4.0782 eV | 304.02 nm | f=0.0039 |
| 266 ->295          | 0.10638   |           |           |          |
| 274 ->297          | 0.12519   |           |           |          |
| 277 ->300          | 0.10514   |           |           |          |
| 282 ->299          | -0.12127  |           |           |          |
| 284 ->300          | -0.11643  |           |           |          |
| 284 ->316          | 0.14804   |           |           |          |
| 285 ->301          | -0.10120  |           |           |          |
| Excited State 269: | Singlet-A | 4.0807 eV | 303.83 nm | f=0.0245 |
| 265 ->294          | 0.11403   |           |           |          |
| 277 ->300          | 0.11396   |           |           |          |
| 281 ->298          | -0.11262  |           |           |          |
| 281 ->310          | 0.12771   |           |           |          |
| 281 ->313          | 0.11868   |           |           |          |
| 283 ->309          | -0.11424  |           |           |          |
| 285 ->301          | -0.12784  |           |           |          |
| 285 ->303          | 0.22019   |           |           |          |
| 285 ->308          | 0.11710   |           |           |          |
| 285 ->310          | 0.12036   |           |           |          |
| 285 ->313          | -0.13221  |           |           |          |
| Excited State 270: | Singlet-A | 4.0834 eV | 303.63 nm | f=0.0025 |
| 265 ->296          | 0.10071   |           |           |          |
| 272 ->297          | -0.11034  |           |           |          |
| 274 ->297          | 0.15497   |           |           |          |

|                    |           |           |           |          |
|--------------------|-----------|-----------|-----------|----------|
| 277 ->300          | -0.12283  |           |           |          |
| 278 ->310          | -0.10110  |           |           |          |
| 283 ->300          | -0.12958  |           |           |          |
| 283 ->307          | 0.10405   |           |           |          |
| 284 ->316          | 0.13548   |           |           |          |
| Excited State 271: | Singlet-A | 4.0855 eV | 303.47 nm | f=0.0042 |
| 265 ->296          | -0.11365  |           |           |          |
| 277 ->299          | -0.10020  |           |           |          |
| 278 ->298          | -0.11010  |           |           |          |
| 278 ->310          | 0.14576   |           |           |          |
| 281 ->304          | -0.11768  |           |           |          |
| 283 ->304          | -0.13027  |           |           |          |
| 283 ->309          | -0.14126  |           |           |          |
| Excited State 272: | Singlet-A | 4.0878 eV | 303.30 nm | f=0.0015 |
| 270 ->297          | -0.26238  |           |           |          |
| 272 ->297          | -0.13714  |           |           |          |
| 273 ->297          | -0.20672  |           |           |          |
| 274 ->297          | 0.46479   |           |           |          |
| 282 ->300          | -0.10169  |           |           |          |
| Excited State 273: | Singlet-A | 4.0913 eV | 303.04 nm | f=0.0014 |
| 266 ->295          | 0.30799   |           |           |          |
| 267 ->295          | 0.14000   |           |           |          |
| 268 ->295          | 0.31902   |           |           |          |
| 270 ->295          | -0.14860  |           |           |          |
| 274 ->297          | -0.13881  |           |           |          |
| 275 ->295          | -0.11599  |           |           |          |
| 282 ->300          | -0.16791  |           |           |          |
| 282 ->301          | 0.12341   |           |           |          |
| 282 ->303          | 0.10160   |           |           |          |
| Excited State 274: | Singlet-A | 4.0962 eV | 302.68 nm | f=0.0053 |
| 265 ->294          | -0.11119  |           |           |          |
| 265 ->296          | 0.11132   |           |           |          |
| 271 ->296          | -0.10171  |           |           |          |
| 276 ->299          | -0.12787  |           |           |          |
| 277 ->299          | -0.11713  |           |           |          |
| 277 ->300          | 0.10495   |           |           |          |
| 278 ->310          | -0.10019  |           |           |          |
| 281 ->298          | 0.10550   |           |           |          |
| 281 ->313          | -0.10382  |           |           |          |
| 285 ->302          | -0.12838  |           |           |          |

|                    |           |           |           |          |
|--------------------|-----------|-----------|-----------|----------|
| 285 ->305          | 0.14185   |           |           |          |
| 285 ->313          | 0.10308   |           |           |          |
| 285 ->314          | 0.10309   |           |           |          |
| Excited State 275: | Singlet-A | 4.0972 eV | 302.61 nm | f=0.0035 |
| 261 ->286          | 0.14109   |           |           |          |
| 261 ->288          | -0.13932  |           |           |          |
| 263 ->286          | 0.13863   |           |           |          |
| 263 ->288          | -0.11579  |           |           |          |
| 280 ->301          | 0.10801   |           |           |          |
| 283 ->302          | -0.10757  |           |           |          |
| 284 ->316          | 0.10938   |           |           |          |
| 285 ->303          | 0.15097   |           |           |          |
| Excited State 276: | Singlet-A | 4.1020 eV | 302.25 nm | f=0.0008 |
| 266 ->295          | 0.10496   |           |           |          |
| 266 ->297          | 0.13108   |           |           |          |
| 270 ->297          | -0.10079  |           |           |          |
| 274 ->297          | 0.13266   |           |           |          |
| 279 ->312          | 0.14322   |           |           |          |
| 279 ->314          | 0.12403   |           |           |          |
| 279 ->315          | -0.11274  |           |           |          |
| 281 ->298          | 0.10580   |           |           |          |
| 284 ->300          | 0.16049   |           |           |          |
| 284 ->302          | 0.16516   |           |           |          |
| 284 ->305          | -0.10679  |           |           |          |
| 284 ->306          | -0.11744  |           |           |          |
| 284 ->316          | -0.12196  |           |           |          |
| 285 ->303          | 0.14929   |           |           |          |
| Excited State 277: | Singlet-A | 4.1033 eV | 302.15 nm | f=0.0004 |
| 265 ->294          | 0.23703   |           |           |          |
| 280 ->298          | 0.17068   |           |           |          |
| 280 ->299          | -0.16479  |           |           |          |
| 281 ->298          | 0.20444   |           |           |          |
| 281 ->299          | -0.19165  |           |           |          |
| 281 ->313          | -0.13328  |           |           |          |
| Excited State 278: | Singlet-A | 4.1071 eV | 301.87 nm | f=0.0009 |
| 260 ->288          | -0.14503  |           |           |          |
| 260 ->291          | -0.12866  |           |           |          |
| 260 ->292          | 0.11596   |           |           |          |
| 262 ->287          | 0.10024   |           |           |          |
| 262 ->288          | 0.19917   |           |           |          |

|                    |           |           |           |          |
|--------------------|-----------|-----------|-----------|----------|
| 262 ->289          | 0.11863   |           |           |          |
| 262 ->291          | 0.14869   |           |           |          |
| 262 ->292          | -0.11917  |           |           |          |
| 283 ->302          | 0.14789   |           |           |          |
| 283 ->305          | 0.11585   |           |           |          |
| 285 ->303          | 0.16434   |           |           |          |
| 285 ->308          | -0.10906  |           |           |          |
| Excited State 279: | Singlet-A | 4.1098 eV | 301.68 nm | f=0.0034 |
| 265 ->294          | -0.20775  |           |           |          |
| 285 ->303          | 0.35409   |           |           |          |
| 285 ->305          | 0.11496   |           |           |          |
| 285 ->308          | -0.18255  |           |           |          |
| Excited State 280: | Singlet-A | 4.1154 eV | 301.27 nm | f=0.0144 |
| 269 ->296          | -0.10009  |           |           |          |
| 272 ->299          | 0.11497   |           |           |          |
| 273 ->298          | 0.15094   |           |           |          |
| 273 ->299          | -0.10998  |           |           |          |
| 279 ->316          | -0.10829  |           |           |          |
| 280 ->300          | 0.10453   |           |           |          |
| 281 ->300          | 0.20028   |           |           |          |
| 282 ->303          | -0.12404  |           |           |          |
| 285 ->303          | -0.19937  |           |           |          |
| 285 ->308          | 0.11274   |           |           |          |
| Excited State 281: | Singlet-A | 4.1166 eV | 301.18 nm | f=0.0015 |
| 265 ->294          | 0.11235   |           |           |          |
| 273 ->299          | 0.13756   |           |           |          |
| 274 ->302          | 0.12042   |           |           |          |
| 278 ->300          | 0.17132   |           |           |          |
| 278 ->302          | 0.10775   |           |           |          |
| 280 ->300          | 0.21899   |           |           |          |
| 281 ->300          | 0.19274   |           |           |          |
| 282 ->300          | -0.10634  |           |           |          |
| Excited State 282: | Singlet-A | 4.1186 eV | 301.03 nm | f=0.0006 |
| 266 ->297          | -0.11665  |           |           |          |
| 268 ->295          | -0.11839  |           |           |          |
| 279 ->300          | -0.16451  |           |           |          |
| 279 ->301          | -0.14500  |           |           |          |
| 279 ->305          | 0.12109   |           |           |          |
| 279 ->306          | -0.12097  |           |           |          |
| 279 ->316          | 0.13696   |           |           |          |

|                    |           |           |           |          |
|--------------------|-----------|-----------|-----------|----------|
| 281 ->299          | -0.11406  |           |           |          |
| 282 ->298          | -0.14014  |           |           |          |
| 282 ->299          | -0.22401  |           |           |          |
| 282 ->301          | 0.23709   |           |           |          |
| 284 ->302          | 0.10828   |           |           |          |
| Excited State 283: | Singlet-A | 4.1223 eV | 300.76 nm | f=0.0003 |
| 265 ->294          | 0.13318   |           |           |          |
| 276 ->298          | -0.14341  |           |           |          |
| 276 ->299          | 0.14319   |           |           |          |
| 277 ->299          | 0.18820   |           |           |          |
| 278 ->300          | 0.10963   |           |           |          |
| 280 ->299          | 0.16498   |           |           |          |
| 280 ->301          | 0.12191   |           |           |          |
| 281 ->298          | -0.13364  |           |           |          |
| 281 ->299          | 0.17648   |           |           |          |
| 281 ->301          | -0.18703  |           |           |          |
| 281 ->313          | -0.10316  |           |           |          |
| 282 ->301          | 0.11692   |           |           |          |
| Excited State 284: | Singlet-A | 4.1243 eV | 300.62 nm | f=0.0006 |
| 265 ->294          | 0.17063   |           |           |          |
| 273 ->299          | -0.10776  |           |           |          |
| 276 ->298          | 0.12834   |           |           |          |
| 276 ->299          | -0.10435  |           |           |          |
| 277 ->298          | 0.10859   |           |           |          |
| 277 ->299          | -0.16827  |           |           |          |
| 280 ->298          | -0.13482  |           |           |          |
| 280 ->299          | 0.18285   |           |           |          |
| 280 ->301          | -0.16194  |           |           |          |
| 281 ->298          | -0.11267  |           |           |          |
| 281 ->299          | 0.15089   |           |           |          |
| 284 ->302          | 0.13348   |           |           |          |
| Excited State 285: | Singlet-A | 4.1267 eV | 300.45 nm | f=0.0001 |
| 270 ->297          | 0.20314   |           |           |          |
| 272 ->297          | 0.26584   |           |           |          |
| 273 ->297          | 0.32044   |           |           |          |
| 274 ->297          | 0.36643   |           |           |          |
| 275 ->297          | -0.10846  |           |           |          |
| Excited State 286: | Singlet-A | 4.1281 eV | 300.34 nm | f=0.0008 |
| 266 ->295          | -0.14153  |           |           |          |
| 268 ->295          | 0.18094   |           |           |          |

|                    |           |           |           |          |
|--------------------|-----------|-----------|-----------|----------|
| 270 ->297          | -0.14191  |           |           |          |
| 272 ->297          | -0.11141  |           |           |          |
| 273 ->297          | -0.15205  |           |           |          |
| 274 ->297          | -0.16236  |           |           |          |
| 275 ->298          | -0.13772  |           |           |          |
| 282 ->300          | 0.10605   |           |           |          |
| 283 ->302          | 0.18046   |           |           |          |
| 284 ->302          | 0.11029   |           |           |          |
| 284 ->305          | -0.10802  |           |           |          |
| Excited State 287: | Singlet-A | 4.1292 eV | 300.26 nm | f=0.0010 |
| 266 ->295          | -0.19374  |           |           |          |
| 267 ->295          | 0.12270   |           |           |          |
| 268 ->295          | 0.15056   |           |           |          |
| 275 ->298          | 0.12776   |           |           |          |
| 276 ->299          | 0.10161   |           |           |          |
| 283 ->302          | -0.12445  |           |           |          |
| 283 ->305          | -0.10031  |           |           |          |
| 284 ->302          | 0.19636   |           |           |          |
| 284 ->305          | -0.12188  |           |           |          |
| 284 ->315          | -0.13850  |           |           |          |
| 284 ->316          | 0.11651   |           |           |          |
| Excited State 288: | Singlet-A | 4.1346 eV | 299.87 nm | f=0.0027 |
| 269 ->296          | 0.45098   |           |           |          |
| 272 ->296          | -0.29046  |           |           |          |
| 278 ->300          | -0.20102  |           |           |          |
| 281 ->300          | 0.10157   |           |           |          |
| Excited State 289: | Singlet-A | 4.1359 eV | 299.78 nm | f=0.0029 |
| 266 ->297          | -0.14609  |           |           |          |
| 269 ->296          | 0.14045   |           |           |          |
| 270 ->297          | 0.12956   |           |           |          |
| 282 ->299          | 0.18573   |           |           |          |
| 282 ->301          | -0.17157  |           |           |          |
| 284 ->302          | 0.18117   |           |           |          |
| 284 ->305          | -0.11155  |           |           |          |
| 284 ->316          | 0.20682   |           |           |          |
| Excited State 290: | Singlet-A | 4.1412 eV | 299.39 nm | f=0.0005 |
| 269 ->296          | 0.14320   |           |           |          |
| 272 ->296          | -0.17059  |           |           |          |
| 278 ->300          | 0.38617   |           |           |          |
| 278 ->302          | 0.22687   |           |           |          |



|                    |           |           |           |          |
|--------------------|-----------|-----------|-----------|----------|
| 278 ->305          | 0.10440   |           |           |          |
| 280 ->299          | -0.10119  |           |           |          |
| Excited State 291: | Singlet-A | 4.1431 eV | 299.26 nm | f=0.0056 |
| 266 ->295          | -0.18894  |           |           |          |
| 267 ->297          | -0.12512  |           |           |          |
| 268 ->295          | 0.30990   |           |           |          |
| 269 ->295          | 0.10491   |           |           |          |
| 278 ->300          | 0.10139   |           |           |          |
| 279 ->298          | -0.21255  |           |           |          |
| 279 ->300          | -0.24276  |           |           |          |
| 279 ->301          | -0.14687  |           |           |          |
| Excited State 292: | Singlet-A | 4.1469 eV | 298.98 nm | f=0.0004 |
| 269 ->296          | 0.11712   |           |           |          |
| 270 ->296          | -0.19491  |           |           |          |
| 272 ->296          | 0.33641   |           |           |          |
| 273 ->296          | -0.24112  |           |           |          |
| 280 ->303          | 0.10479   |           |           |          |
| 282 ->303          | 0.17784   |           |           |          |
| Excited State 293: | Singlet-A | 4.1495 eV | 298.79 nm | f=0.0004 |
| 269 ->296          | 0.22344   |           |           |          |
| 270 ->296          | -0.18989  |           |           |          |
| 272 ->296          | 0.27500   |           |           |          |
| 273 ->296          | -0.24964  |           |           |          |
| 275 ->298          | 0.10258   |           |           |          |
| 278 ->300          | 0.12409   |           |           |          |
| 282 ->303          | -0.22622  |           |           |          |
| Excited State 294: | Singlet-A | 4.1526 eV | 298.57 nm | f=0.0004 |
| 269 ->296          | 0.11014   |           |           |          |
| 279 ->298          | 0.20203   |           |           |          |
| 279 ->299          | 0.11344   |           |           |          |
| 279 ->300          | 0.11316   |           |           |          |
| 279 ->301          | 0.17016   |           |           |          |
| 280 ->303          | -0.12108  |           |           |          |
| 281 ->303          | 0.11325   |           |           |          |
| 282 ->303          | 0.12146   |           |           |          |
| Excited State 295: | Singlet-A | 4.1544 eV | 298.44 nm | f=0.0050 |
| 280 ->303          | -0.18573  |           |           |          |
| 281 ->303          | 0.18126   |           |           |          |
| 282 ->298          | -0.12575  |           |           |          |

|                    |           |           |           |          |
|--------------------|-----------|-----------|-----------|----------|
| 282 ->300          | 0.18427   |           |           |          |
| 282 ->303          | 0.23138   |           |           |          |
| 282 ->306          | 0.17094   |           |           |          |
| 283 ->303          | -0.12741  |           |           |          |
| Excited State 296: | Singlet-A | 4.1586 eV | 298.14 nm | f=0.0022 |
| 266 ->297          | -0.10519  |           |           |          |
| 267 ->295          | -0.11301  |           |           |          |
| 268 ->295          | 0.12479   |           |           |          |
| 273 ->299          | -0.10798  |           |           |          |
| 277 ->305          | 0.10194   |           |           |          |
| 279 ->298          | 0.18617   |           |           |          |
| 279 ->299          | 0.12797   |           |           |          |
| 279 ->316          | 0.13183   |           |           |          |
| 280 ->300          | 0.10055   |           |           |          |
| 282 ->303          | -0.10497  |           |           |          |
| 283 ->302          | 0.12221   |           |           |          |
| Excited State 297: | Singlet-A | 4.1608 eV | 297.98 nm | f=0.0032 |
| 265 ->294          | 0.14809   |           |           |          |
| 270 ->298          | 0.13303   |           |           |          |
| 275 ->298          | 0.19429   |           |           |          |
| 275 ->299          | -0.16316  |           |           |          |
| 275 ->301          | 0.14653   |           |           |          |
| 278 ->313          | -0.15602  |           |           |          |
| 281 ->304          | -0.12359  |           |           |          |
| 282 ->303          | 0.14197   |           |           |          |
| 283 ->304          | -0.12193  |           |           |          |
| 285 ->308          | -0.11034  |           |           |          |
| Excited State 298: | Singlet-A | 4.1632 eV | 297.81 nm | f=0.0045 |
| 265 ->294          | -0.12482  |           |           |          |
| 265 ->296          | 0.10987   |           |           |          |
| 269 ->295          | -0.12146  |           |           |          |
| 270 ->295          | 0.13071   |           |           |          |
| 271 ->295          | 0.47337   |           |           |          |
| 278 ->313          | 0.16234   |           |           |          |
| Excited State 299: | Singlet-A | 4.1648 eV | 297.70 nm | f=0.0075 |
| 265 ->294          | 0.14462   |           |           |          |
| 265 ->296          | -0.13259  |           |           |          |
| 270 ->295          | 0.10904   |           |           |          |
| 271 ->295          | 0.40671   |           |           |          |
| 278 ->313          | -0.19256  |           |           |          |

|                    |           |           |           |          |
|--------------------|-----------|-----------|-----------|----------|
| Excited State 300: | Singlet-A | 4.1680 eV | 297.47 nm | f=0.0013 |
|                    | 266 ->286 | -0.13980  |           |          |
|                    | 266 ->287 | 0.10374   |           |          |
|                    | 266 ->295 | 0.10660   |           |          |
|                    | 267 ->289 | 0.16830   |           |          |
|                    | 267 ->291 | -0.11484  |           |          |
|                    | 267 ->295 | -0.10288  |           |          |
|                    | 267 ->297 | 0.17407   |           |          |
|                    | 268 ->297 | 0.13416   |           |          |
|                    | 271 ->295 | 0.17684   |           |          |
|                    | 279 ->298 | -0.12295  |           |          |
|                    | 279 ->299 | -0.13603  |           |          |
|                    | 279 ->300 | 0.10867   |           |          |
|                    | 279 ->301 | -0.13341  |           |          |
|                    | 279 ->303 | -0.10950  |           |          |
|                    | 284 ->302 | 0.11853   |           |          |

**Orbital coefficients of atoms corresponding to peaks 1 and 2 in the absorption spectrum of cluster 1 in DMSO solution**

**Peak 1: 285→291; 285→293**

|    |   |      |  | 285(HOMO) |
|----|---|------|--|-----------|
| 23 | S | 1S   |  | -0.00110  |
|    |   | 2S   |  | 0.00493   |
|    |   | 2PX  |  | 0.02698   |
|    |   | 2PY  |  | 0.02039   |
|    |   | 2PZ  |  | -0.08656  |
|    |   | 3S   |  | -0.01179  |
|    |   | 3PX  |  | -0.07152  |
|    |   | 3PY  |  | -0.05422  |
|    |   | 3PZ  |  | 0.22799   |
|    |   | 4S   |  | -0.00364  |
|    |   | 4PX  |  | -0.04675  |
|    |   | 4PY  |  | -0.03215  |
|    |   | 4PZ  |  | 0.15302   |
|    |   | 5D 0 |  | 0.00291   |
|    |   | 5D+1 |  | -0.00579  |
|    |   | 5D-1 |  | -0.00120  |
|    |   | 5D+2 |  | 0.00132   |
|    |   | 5D-2 |  | 0.00264   |
| 27 | S | 1S   |  | 0.00152   |
|    |   | 2S   |  | -0.00682  |

|    |      |          |          |
|----|------|----------|----------|
|    | 2PX  | -0.08589 |          |
|    | 2PY  | 0.03258  |          |
|    | 2PZ  | 0.00397  |          |
|    | 3S   | 0.01622  |          |
|    | 3PX  | 0.22835  |          |
|    | 3PY  | -0.08645 |          |
|    | 3PZ  | -0.00992 |          |
|    | 4S   | 0.01632  |          |
|    | 4PX  | 0.13329  |          |
|    | 4PY  | -0.04723 |          |
|    | 4PZ  | -0.01352 |          |
|    | 5D 0 | 0.00316  |          |
|    | 5D+1 | 0.00364  |          |
|    | 5D-1 | -0.00205 |          |
|    | 5D+2 | -0.00290 |          |
|    | 5D-2 | 0.00560  |          |
| 28 | S    | 1S       | 0.00058  |
|    |      | 2S       | -0.00295 |
|    |      | 2PX      | 0.03068  |
|    |      | 2PY      | 0.02995  |
|    |      | 2PZ      | -0.11086 |
|    |      | 3S       | 0.00510  |
|    |      | 3PX      | -0.08048 |
|    |      | 3PY      | -0.07791 |
|    |      | 3PZ      | 0.29123  |
|    |      | 4S       | 0.00242  |
|    |      | 4PX      | -0.05243 |
|    |      | 4PY      | -0.05773 |
|    |      | 4PZ      | 0.19137  |
|    |      | 5D 0     | -0.00344 |
|    |      | 5D+1     | 0.00436  |
|    |      | 5D-1     | -0.00320 |
|    |      | 5D+2     | -0.00134 |
|    |      | 5D-2     | -0.00086 |
| 30 | S    | 1S       | 0.00002  |
|    |      | 2S       | 0.00004  |
|    |      | 2PX      | -0.01638 |
|    |      | 2PY      | -0.03479 |
|    |      | 2PZ      | 0.07514  |
|    |      | 3S       | 0.00052  |
|    |      | 3PX      | 0.04317  |
|    |      | 3PY      | 0.09005  |
|    |      | 3PZ      | -0.19531 |
|    |      | 4S       | -0.01850 |

|    |      |          |
|----|------|----------|
|    | 4PX  | 0.03810  |
|    | 4PY  | 0.06603  |
|    | 4PZ  | -0.13278 |
|    | 5D 0 | 0.00066  |
|    | 5D+1 | 0.00258  |
|    | 5D-1 | -0.00112 |
|    | 5D+2 | -0.00154 |
|    | 5D-2 | -0.00107 |
| 33 | S 1S | -0.00108 |
|    | 2S   | 0.00478  |
|    | 2PX  | -0.09282 |
|    | 2PY  | 0.07107  |
|    | 2PZ  | -0.00231 |
|    | 3S   | -0.01196 |
|    | 3PX  | 0.24329  |
|    | 3PY  | -0.18585 |
|    | 3PZ  | 0.00608  |
|    | 4S   | -0.00633 |
|    | 4PX  | 0.15782  |
|    | 4PY  | -0.13013 |
|    | 4PZ  | 0.00956  |
|    | 5D 0 | -0.00293 |
|    | 5D+1 | -0.00210 |
|    | 5D-1 | 0.00270  |
|    | 5D+2 | 0.00537  |
|    | 5D-2 | -0.00201 |
| 34 | S 1S | 0.00019  |
|    | 2S   | -0.00078 |
|    | 2PX  | 0.05734  |
|    | 2PY  | -0.06431 |
|    | 2PZ  | 0.00910  |
|    | 3S   | 0.00241  |
|    | 3PX  | -0.15018 |
|    | 3PY  | 0.16801  |
|    | 3PZ  | -0.02255 |
|    | 4S   | 0.02744  |
|    | 4PX  | -0.10048 |
|    | 4PY  | 0.12008  |
|    | 4PZ  | -0.00544 |
|    | 5D 0 | 0.00050  |
|    | 5D+1 | -0.00253 |
|    | 5D-1 | 0.00294  |
|    | 5D+2 | 0.00088  |
|    | 5D-2 | 0.00022  |

.....

|    |   | <b>291(LUMO+5)</b> |          |
|----|---|--------------------|----------|
| 3  | W | 1S                 | 0.00081  |
|    |   | 2S                 | 0.00719  |
|    |   | 3S                 | -0.11187 |
|    |   | 4PX                | 0.00212  |
|    |   | 4PY                | 0.00302  |
|    |   | 4PZ                | 0.00309  |
|    |   | 5PX                | 0.00361  |
|    |   | 5PY                | -0.02123 |
|    |   | 5PZ                | -0.00500 |
|    |   | 6PX                | -0.12733 |
|    |   | 6PY                | -0.09314 |
|    |   | 6PZ                | 0.01381  |
|    |   | 7D 0               | -0.39572 |
|    |   | 7D+1               | -0.10290 |
|    |   | 7D-1               | 0.12006  |
|    |   | 7D+2               | -0.00926 |
|    |   | 7D-2               | -0.06049 |
|    |   | 8D 0               | -0.20339 |
|    |   | 8D+1               | -0.03629 |
|    |   | 8D-1               | 0.08556  |
|    |   | 8D+2               | -0.00542 |
|    |   | 8D-2               | -0.03766 |
|    |   | 9F 0               | 0.00048  |
|    |   | 9F+1               | 0.00055  |
|    |   | 9F-1               | 0.00127  |
|    |   | 9F+2               | -0.00066 |
|    |   | 9F-2               | 0.00048  |
|    |   | 9F+3               | -0.00078 |
| 21 | S | 1S                 | -0.00013 |
|    |   | 2S                 | -0.00016 |
|    |   | 2PX                | -0.00067 |
|    |   | 2PY                | 0.02294  |
|    |   | 2PZ                | 0.04582  |
|    |   | 3S                 | -0.00410 |
|    |   | 3PX                | 0.00186  |
|    |   | 3PY                | -0.06076 |
|    |   | 3PZ                | -0.11918 |
|    |   | 4S                 | 0.03617  |
|    |   | 4PX                | 0.00414  |
|    |   | 4PY                | -0.08666 |
|    |   | 4PZ                | -0.15311 |

|    |   |      |          |
|----|---|------|----------|
|    |   | 5D 0 | 0.01464  |
|    |   | 5D+1 | -0.00228 |
|    |   | 5D-1 | -0.01483 |
|    |   | 5D+2 | 0.01209  |
|    |   | 5D-2 | -0.00152 |
| 22 | S | 1S   | -0.00118 |
|    |   | 2S   | 0.00524  |
|    |   | 2PX  | 0.01964  |
|    |   | 2PY  | -0.01149 |
|    |   | 2PZ  | -0.04838 |
|    |   | 3S   | -0.01332 |
|    |   | 3PX  | -0.05030 |
|    |   | 3PY  | 0.03116  |
|    |   | 3PZ  | 0.12863  |
|    |   | 4S   | -0.03328 |
|    |   | 4PX  | -0.06590 |
|    |   | 4PY  | 0.02487  |
|    |   | 4PZ  | 0.14364  |
|    |   | 5D 0 | 0.01329  |
|    |   | 5D+1 | 0.01372  |
|    |   | 5D-1 | -0.00055 |
|    |   | 5D+2 | -0.01035 |
|    |   | 5D-2 | 0.00326  |
| 24 | S | 1S   | -0.00033 |
|    |   | 2S   | 0.00120  |
|    |   | 2PX  | -0.03092 |
|    |   | 2PY  | 0.01645  |
|    |   | 2PZ  | -0.03262 |
|    |   | 3S   | -0.00472 |
|    |   | 3PX  | 0.08116  |
|    |   | 3PY  | -0.04240 |
|    |   | 3PZ  | 0.08494  |
|    |   | 4S   | 0.01072  |
|    |   | 4PX  | 0.10762  |
|    |   | 4PY  | -0.06457 |
|    |   | 4PZ  | 0.10622  |
|    |   | 5D 0 | 0.01777  |
|    |   | 5D+1 | -0.00146 |
|    |   | 5D-1 | -0.00553 |
|    |   | 5D+2 | -0.01215 |
|    |   | 5D-2 | 0.00772  |
| 26 | S | 1S   | -0.00134 |
|    |   | 2S   | 0.00587  |
|    |   | 2PX  | 0.01356  |

|   |      |          |
|---|------|----------|
|   | 2PY  | -0.03375 |
|   | 2PZ  | 0.03101  |
|   | 3S   | -0.01562 |
|   | 3PX  | -0.03669 |
|   | 3PY  | 0.08786  |
|   | 3PZ  | -0.08460 |
|   | 4S   | -0.04988 |
|   | 4PX  | -0.03888 |
|   | 4PY  | 0.10353  |
|   | 4PZ  | -0.08711 |
|   | 5D 0 | 0.01413  |
|   | 5D+1 | 0.00560  |
|   | 5D-1 | 0.00064  |
|   | 5D+2 | 0.01406  |
|   | 5D-2 | -0.00230 |
|   | 9F-3 | 0.00031  |
| 1 | W 1S | -0.00116 |
|   | 2S   | -0.01090 |
|   | 3S   | -0.03488 |
|   | 4PX  | 0.00388  |
|   | 4PY  | -0.00809 |
|   | 4PZ  | -0.00095 |
|   | 5PX  | 0.00365  |
|   | 5PY  | 0.04112  |
|   | 5PZ  | -0.00112 |
|   | 6PX  | 0.08499  |
|   | 6PY  | 0.09950  |
|   | 6PZ  | -0.01361 |
|   | 7D 0 | 0.17675  |
|   | 7D+1 | 0.13290  |
|   | 7D-1 | 0.19225  |
|   | 7D+2 | 0.17652  |
|   | 7D-2 | -0.17359 |
|   | 8D 0 | 0.08720  |
|   | 8D+1 | 0.08602  |
|   | 8D-1 | 0.08440  |
|   | 8D+2 | 0.10877  |
|   | 8D-2 | -0.08498 |
|   | 9F 0 | 0.00018  |
|   | 9F+1 | 0.00046  |
|   | 9F-1 | 0.00033  |
|   | 9F+2 | 0.00085  |
|   | 9F-2 | -0.00030 |



|    |   |      |          |
|----|---|------|----------|
|    |   | 9F+3 | -0.00020 |
|    |   | 9F-3 | -0.00076 |
| 12 | S | 1S   | -0.00018 |
|    |   | 2S   | 0.00033  |
|    |   | 2PX  | 0.01131  |
|    |   | 2PY  | 0.02304  |
|    |   | 2PZ  | -0.02890 |
|    |   | 3S   | -0.00363 |
|    |   | 3PX  | -0.03062 |
|    |   | 3PY  | -0.05975 |
|    |   | 3PZ  | 0.07650  |
|    |   | 4S   | 0.03623  |
|    |   | 4PX  | -0.03191 |
|    |   | 4PY  | -0.06149 |
|    |   | 4PZ  | 0.10188  |
|    |   | 5D 0 | -0.01385 |
|    |   | 5D+1 | 0.00510  |
|    |   | 5D-1 | -0.00694 |
|    |   | 5D+2 | -0.00844 |
|    |   | 5D-2 | 0.00198  |
| 14 | S | 1S   | 0.00006  |
|    |   | 2S   | -0.00094 |
|    |   | 2PX  | -0.03716 |
|    |   | 2PY  | -0.02954 |
|    |   | 2PZ  | -0.00815 |
|    |   | 3S   | -0.00188 |
|    |   | 3PX  | 0.09788  |
|    |   | 3PY  | 0.07831  |
|    |   | 3PZ  | 0.02054  |
|    |   | 4S   | -0.00204 |
|    |   | 4PX  | 0.11232  |
|    |   | 4PY  | 0.09805  |
|    |   | 4PZ  | 0.02879  |
|    |   | 5D 0 | -0.00204 |
|    |   | 5D+1 | -0.01178 |
|    |   | 5D-1 | -0.00427 |
|    |   | 5D+2 | -0.01783 |
|    |   | 5D-2 | 0.00222  |
| 17 | S | 1S   | 0.00029  |
|    |   | 2S   | -0.00180 |
|    |   | 2PX  | 0.01622  |
|    |   | 2PY  | 0.03596  |
|    |   | 2PZ  | 0.01474  |
|    |   | 3S   | 0.00156  |

|    |   |      |          |
|----|---|------|----------|
|    |   | 3PX  | -0.04518 |
|    |   | 3PY  | -0.09521 |
|    |   | 3PZ  | -0.03917 |
|    |   | 4S   | 0.02493  |
|    |   | 4PX  | -0.02307 |
|    |   | 4PY  | -0.10832 |
|    |   | 4PZ  | -0.05359 |
|    |   | 5D 0 | -0.00665 |
|    |   | 5D+1 | 0.00234  |
|    |   | 5D-1 | -0.01355 |
|    |   | 5D+2 | 0.00119  |
|    |   | 5D-2 | 0.00910  |
| 19 | S | 1S   | -0.00023 |
|    |   | 2S   | 0.00107  |
|    |   | 2PX  | 0.00121  |
|    |   | 2PY  | -0.02818 |
|    |   | 2PZ  | 0.02925  |
|    |   | 3S   | -0.00245 |
|    |   | 3PX  | -0.00217 |
|    |   | 3PY  | 0.07500  |
|    |   | 3PZ  | -0.07705 |
|    |   | 4S   | -0.02964 |
|    |   | 4PX  | 0.00091  |
|    |   | 4PY  | 0.08832  |
|    |   | 4PZ  | -0.08777 |
|    |   | 5D 0 | -0.00601 |
|    |   | 5D+1 | -0.01583 |
|    |   | 5D-1 | 0.00073  |
|    |   | 5D+2 | -0.00459 |
|    |   | 5D-2 | 0.01179  |
| 5  | W | 1S   | -0.00100 |
|    |   | 2S   | -0.00662 |
|    |   | 3S   | 0.03617  |
|    |   | 4PX  | -0.00168 |
|    |   | 4PY  | 0.00657  |
|    |   | 4PZ  | -0.00605 |
|    |   | 5PX  | 0.01575  |
|    |   | 5PY  | -0.00864 |
|    |   | 5PZ  | -0.01347 |
|    |   | 6PX  | -0.17962 |
|    |   | 6PY  | -0.06815 |
|    |   | 6PZ  | 0.05178  |
|    |   | 7D 0 | 0.24344  |

|      |      |          |
|------|------|----------|
|      | 7D+1 | 0.15166  |
|      | 7D-1 | -0.00600 |
|      | 7D+2 | 0.01832  |
|      | 7D-2 | 0.08418  |
|      | 8D 0 | 0.11089  |
|      | 8D+1 | 0.09629  |
|      | 8D-1 | -0.00639 |
|      | 8D+2 | 0.01804  |
|      | 8D-2 | 0.06386  |
|      | 9F 0 | -0.00006 |
|      | 9F+1 | -0.00027 |
|      | 9F-1 | 0.00048  |
|      | 9F+2 | -0.00002 |
|      | 9F-2 | 0.00001  |
|      | 9F+3 | -0.00110 |
|      | 9F-3 | 0.00011  |
| 29 S | 1S   | 0.00050  |
|      | 2S   | -0.00316 |
|      | 2PX  | 0.02987  |
|      | 2PY  | -0.01400 |
|      | 2PZ  | 0.02373  |
|      | 3S   | 0.00218  |
|      | 3PX  | -0.07781 |
|      | 3PY  | 0.03692  |
|      | 3PZ  | -0.06419 |
|      | 4S   | 0.05386  |
|      | 4PX  | -0.08822 |
|      | 4PY  | 0.04506  |
|      | 4PZ  | -0.07442 |
|      | 5D 0 | -0.01190 |
|      | 5D+1 | -0.00506 |
|      | 5D-1 | 0.00376  |
|      | 5D+2 | 0.00929  |
|      | 5D-2 | -0.00282 |
| 31 S | 1S   | -0.00069 |
|      | 2S   | 0.00317  |
|      | 2PX  | -0.00588 |
|      | 2PY  | 0.02150  |
|      | 2PZ  | 0.02508  |
|      | 3S   | -0.00721 |
|      | 3PX  | 0.01780  |
|      | 3PY  | -0.05642 |
|      | 3PZ  | -0.06424 |
|      | 4S   | -0.02812 |

|      |      |          |
|------|------|----------|
|      | 4PX  | 0.00974  |
|      | 4PY  | -0.07319 |
|      | 4PZ  | -0.09317 |
|      | 5D 0 | -0.00489 |
|      | 5D+1 | -0.01490 |
|      | 5D-1 | -0.00278 |
|      | 5D+2 | 0.00065  |
|      | 5D-2 | -0.00494 |
| 32 S | 1S   | 0.00003  |
|      | 2S   | 0.00056  |
|      | 2PX  | 0.00927  |
|      | 2PY  | -0.02219 |
|      | 2PZ  | -0.02365 |
|      | 3S   | 0.00290  |
|      | 3PX  | -0.02425 |
|      | 3PY  | 0.05821  |
|      | 3PZ  | 0.06379  |
|      | 4S   | -0.00243 |
|      | 4PX  | -0.03149 |
|      | 4PY  | 0.07305  |
|      | 4PZ  | 0.06282  |
|      | 5D 0 | -0.01286 |
|      | 5D+1 | 0.00134  |
|      | 5D-1 | 0.00321  |
|      | 5D+2 | -0.00750 |
|      | 5D-2 | -0.00009 |
| 35 S | 1S   | -0.00010 |
|      | 2S   | 0.00070  |
|      | 2PX  | -0.01595 |
|      | 2PY  | 0.01694  |
|      | 2PZ  | -0.02250 |
|      | 3S   | -0.00020 |
|      | 3PX  | 0.04099  |
|      | 3PY  | -0.04480 |
|      | 3PZ  | 0.05822  |
|      | 4S   | -0.01689 |
|      | 4PX  | 0.06542  |
|      | 4PY  | -0.05881 |
|      | 4PZ  | 0.07505  |
|      | 5D 0 | -0.00734 |
|      | 5D+1 | -0.00495 |
|      | 5D-1 | -0.00661 |
|      | 5D+2 | -0.01028 |
|      | 5D-2 | -0.00437 |

|    |   |      |          |
|----|---|------|----------|
| 4  | W | 1S   | -0.00083 |
|    |   | 2S   | -0.00672 |
|    |   | 3S   | 0.00766  |
|    |   | 4PX  | -0.00114 |
|    |   | 4PY  | -0.00271 |
|    |   | 4PZ  | -0.00157 |
|    |   | 5PX  | 0.01535  |
|    |   | 5PY  | -0.00405 |
|    |   | 5PZ  | 0.00769  |
|    |   | 6PX  | 0.04698  |
|    |   | 6PY  | 0.00927  |
|    |   | 6PZ  | 0.05144  |
|    |   | 7D 0 | -0.11447 |
|    |   | 7D+1 | -0.01100 |
|    |   | 7D-1 | 0.13683  |
|    |   | 7D+2 | -0.12514 |
|    |   | 7D-2 | 0.20320  |
|    |   | 8D 0 | -0.06767 |
|    |   | 8D+1 | -0.01434 |
|    |   | 8D-1 | 0.06604  |
|    |   | 8D+2 | -0.05699 |
|    |   | 8D-2 | 0.10998  |
|    |   | 9F 0 | -0.00018 |
|    |   | 9F+1 | 0.00007  |
|    |   | 9F-1 | -0.00140 |
|    |   | 9F+2 | 0.00015  |
|    |   | 9F-2 | -0.00012 |
|    |   | 9F+3 | 0.00034  |
|    |   | 9F-3 | -0.00002 |
| 20 | S | 1S   | 0.00025  |
|    |   | 2S   | -0.00125 |
|    |   | 2PX  | -0.01602 |
|    |   | 2PY  | -0.01626 |
|    |   | 2PZ  | -0.02580 |
|    |   | 3S   | 0.00222  |
|    |   | 3PX  | 0.04156  |
|    |   | 3PY  | 0.04209  |
|    |   | 3PZ  | 0.06723  |
|    |   | 4S   | 0.00185  |
|    |   | 4PX  | 0.05696  |
|    |   | 4PY  | 0.05592  |
|    |   | 4PZ  | 0.09051  |
|    |   | 5D 0 | 0.01517  |

|    |   |      |          |
|----|---|------|----------|
|    |   | 5D+1 | 0.00031  |
|    |   | 5D-1 | -0.00234 |
|    |   | 5D+2 | 0.00028  |
|    |   | 5D-2 | -0.00618 |
| 23 | S | 1S   | 0.00025  |
|    |   | 2S   | -0.00119 |
|    |   | 2PX  | -0.00317 |
|    |   | 2PY  | 0.03347  |
|    |   | 2PZ  | -0.00092 |
|    |   | 3S   | 0.00245  |
|    |   | 3PX  | 0.00878  |
|    |   | 3PY  | -0.08659 |
|    |   | 3PZ  | 0.00278  |
|    |   | 4S   | -0.00256 |
|    |   | 4PX  | 0.01204  |
|    |   | 4PY  | -0.11929 |
|    |   | 4PZ  | 0.00401  |
|    |   | 5D 0 | -0.00071 |
|    |   | 5D+1 | 0.00218  |
|    |   | 5D-1 | -0.00233 |
|    |   | 5D+2 | 0.00343  |
|    |   | 5D-2 | -0.01593 |
| 25 | S | 1S   | 0.00143  |
|    |   | 2S   | -0.00688 |
|    |   | 2PX  | 0.02591  |
|    |   | 2PY  | 0.01209  |
|    |   | 2PZ  | 0.02436  |
|    |   | 3S   | 0.01405  |
|    |   | 3PX  | -0.06695 |
|    |   | 3PY  | -0.03196 |
|    |   | 3PZ  | -0.06484 |
|    |   | 4S   | 0.04041  |
|    |   | 4PX  | -0.08818 |
|    |   | 4PY  | -0.04698 |
|    |   | 4PZ  | -0.07268 |
|    |   | 5D 0 | -0.00438 |
|    |   | 5D+1 | 0.00233  |
|    |   | 5D-1 | -0.00504 |
|    |   | 5D+2 | 0.01221  |
|    |   | 5D-2 | -0.00673 |
| 27 | S | 1S   | 0.00071  |
|    |   | 2S   | -0.00330 |
|    |   | 2PX  | -0.00801 |
|    |   | 2PY  | -0.03239 |

|      |          |
|------|----------|
| 2PZ  | 0.01215  |
| 3S   | 0.00768  |
| 3PX  | 0.02038  |
| 3PY  | 0.08586  |
| 3PZ  | -0.03074 |
| 4S   | 0.02842  |
| 4PX  | 0.03331  |
| 4PY  | 0.10223  |
| 4PZ  | -0.03852 |
| 5D 0 | 0.00947  |
| 5D+1 | -0.00241 |
| 5D-1 | -0.00839 |
| 5D+2 | 0.00402  |
| 5D-2 | -0.00031 |

.....

**293(LUMO+7)**

|   |   |      |          |
|---|---|------|----------|
| 1 | W | 1S   | 0.00168  |
|   |   | 2S   | 0.01024  |
|   |   | 3S   | 0.03684  |
|   |   | 4PX  | 0.00171  |
|   |   | 4PY  | -0.00225 |
|   |   | 4PZ  | -0.01345 |
|   |   | 5PX  | -0.00354 |
|   |   | 5PY  | -0.00528 |
|   |   | 5PZ  | 0.01123  |
|   |   | 6PX  | 0.00942  |
|   |   | 6PY  | -0.02337 |
|   |   | 6PZ  | 0.09938  |
|   |   | 7D 0 | 0.34479  |
|   |   | 7D+1 | 0.26166  |
|   |   | 7D-1 | -0.04632 |
|   |   | 7D+2 | -0.28209 |
|   |   | 7D-2 | 0.40129  |
|   |   | 8D 0 | 0.18186  |
|   |   | 8D+1 | 0.12479  |
|   |   | 8D-1 | -0.02028 |
|   |   | 8D+2 | -0.14170 |
|   |   | 8D-2 | 0.20789  |
|   |   | 9F 0 | 0.00091  |
|   |   | 9F+1 | -0.00002 |
|   |   | 9F-1 | -0.00041 |
|   |   | 9F+2 | -0.00093 |
|   |   | 9F-2 | 0.00010  |

|    |   |      |          |
|----|---|------|----------|
|    |   | 9F+3 | 0.00106  |
|    |   | 9F-3 | 0.00051  |
| 12 | S | 1S   | 0.00016  |
|    |   | 2S   | 0.00058  |
|    |   | 2PX  | -0.06887 |
|    |   | 2PY  | 0.00498  |
|    |   | 2PZ  | -0.01308 |
|    |   | 3S   | 0.00652  |
|    |   | 3PX  | 0.17956  |
|    |   | 3PY  | -0.01289 |
|    |   | 3PZ  | 0.03497  |
|    |   | 4S   | -0.02529 |
|    |   | 4PX  | 0.23629  |
|    |   | 4PY  | -0.02334 |
|    |   | 4PZ  | 0.03643  |
|    |   | 5D 0 | -0.00256 |
|    |   | 5D+1 | -0.01556 |
|    |   | 5D-1 | -0.00739 |
|    |   | 5D+2 | -0.00104 |
|    |   | 5D-2 | -0.03094 |
| 14 | S | 1S   | 0.00020  |
|    |   | 2S   | -0.00082 |
|    |   | 2PX  | 0.05140  |
|    |   | 2PY  | -0.01541 |
|    |   | 2PZ  | -0.05475 |
|    |   | 3S   | 0.00243  |
|    |   | 3PX  | -0.13275 |
|    |   | 3PY  | 0.03869  |
|    |   | 3PZ  | 0.14273  |
|    |   | 4S   | 0.01283  |
|    |   | 4PX  | -0.18267 |
|    |   | 4PY  | 0.06308  |
|    |   | 4PZ  | 0.19008  |
|    |   | 5D 0 | -0.02745 |
|    |   | 5D+1 | 0.00624  |
|    |   | 5D-1 | 0.01525  |
|    |   | 5D+2 | 0.00271  |
|    |   | 5D-2 | -0.01680 |
| 17 | S | 1S   | 0.00080  |
|    |   | 2S   | -0.00334 |
|    |   | 2PX  | 0.04724  |
|    |   | 2PY  | -0.03496 |
|    |   | 2PZ  | 0.02967  |
|    |   | 3S   | 0.00957  |



|    |   |      |          |
|----|---|------|----------|
|    |   | 3PX  | -0.12656 |
|    |   | 3PY  | 0.09183  |
|    |   | 3PZ  | -0.07764 |
|    |   | 4S   | -0.00792 |
|    |   | 4PX  | -0.13482 |
|    |   | 4PY  | 0.11812  |
|    |   | 4PZ  | -0.09199 |
|    |   | 5D 0 | -0.02206 |
|    |   | 5D+1 | -0.01332 |
|    |   | 5D-1 | 0.01793  |
|    |   | 5D+2 | 0.01239  |
|    |   | 5D-2 | -0.00015 |
| 19 | S | 1S   | 0.00029  |
|    |   | 2S   | -0.00062 |
|    |   | 2PX  | -0.03096 |
|    |   | 2PY  | 0.05472  |
|    |   | 2PZ  | 0.04702  |
|    |   | 3S   | 0.00576  |
|    |   | 3PX  | 0.08044  |
|    |   | 3PY  | -0.14255 |
|    |   | 3PZ  | -0.12246 |
|    |   | 4S   | -0.00996 |
|    |   | 4PX  | 0.10868  |
|    |   | 4PY  | -0.18498 |
|    |   | 4PZ  | -0.16197 |
|    |   | 5D 0 | -0.00634 |
|    |   | 5D+1 | -0.01472 |
|    |   | 5D-1 | -0.01694 |
|    |   | 5D+2 | 0.02331  |
|    |   | 5D-2 | -0.01708 |

.....

**Peak 2:276→302; 277→298**

**276(HOMO-9)**

|    |   |     |          |
|----|---|-----|----------|
| 12 | S | 1S  | 0.00038  |
|    |   | 2S  | -0.00164 |
|    |   | 2PX | -0.07020 |
|    |   | 2PY | 0.03860  |
|    |   | 2PZ | -0.08080 |
|    |   | 3S  | 0.00440  |
|    |   | 3PX | 0.18480  |
|    |   | 3PY | -0.10175 |
|    |   | 3PZ | 0.21184  |
|    |   | 4S  | -0.00087 |

|    |      |          |          |
|----|------|----------|----------|
|    | 4PX  | 0.11451  |          |
|    | 4PY  | -0.06080 |          |
|    | 4PZ  | 0.13756  |          |
|    | 5D 0 | 0.00411  |          |
|    | 5D+1 | 0.00186  |          |
|    | 5D-1 | 0.00400  |          |
|    | 5D+2 | 0.00281  |          |
|    | 5D-2 | 0.00340  |          |
| 14 | S    | 1S       | 0.00027  |
|    |      | 2S       | -0.00103 |
|    |      | 2PX      | -0.02789 |
|    |      | 2PY      | 0.04230  |
|    |      | 2PZ      | 0.07930  |
|    |      | 3S       | 0.00350  |
|    |      | 3PX      | 0.07372  |
|    |      | 3PY      | -0.11152 |
|    |      | 3PZ      | -0.20693 |
|    |      | 4S       | 0.02153  |
|    |      | 4PX      | 0.05175  |
|    |      | 4PY      | -0.07788 |
|    |      | 4PZ      | -0.13350 |
|    |      | 5D 0     | -0.00468 |
|    |      | 5D+1     | -0.00108 |
|    |      | 5D-1     | -0.00050 |
|    |      | 5D+2     | -0.00002 |
|    |      | 5D-2     | -0.00303 |
| 32 | S    | 1S       | 0.00054  |
|    |      | 2S       | -0.00245 |
|    |      | 2PX      | -0.04356 |
|    |      | 2PY      | -0.06413 |
|    |      | 2PZ      | -0.06611 |
|    |      | 3S       | 0.00579  |
|    |      | 3PX      | 0.11448  |
|    |      | 3PY      | 0.16947  |
|    |      | 3PZ      | 0.17423  |
|    |      | 4S       | -0.00466 |
|    |      | 4PX      | 0.07536  |
|    |      | 4PY      | 0.10699  |
|    |      | 4PZ      | 0.10889  |
|    |      | 5D 0     | 0.00365  |
|    |      | 5D+1     | 0.00222  |
|    |      | 5D-1     | -0.00072 |
|    |      | 5D+2     | 0.00125  |
|    |      | 5D-2     | -0.00097 |

|    |   |      |          |
|----|---|------|----------|
| 35 | S | 1S   | 0.00011  |
|    |   | 2S   | -0.00054 |
|    |   | 2PX  | 0.04014  |
|    |   | 2PY  | -0.04369 |
|    |   | 2PZ  | 0.05910  |
|    |   | 3S   | 0.00122  |
|    |   | 3PX  | -0.10526 |
|    |   | 3PY  | 0.11517  |
|    |   | 3PZ  | -0.15431 |
|    |   | 4S   | 0.02290  |
|    |   | 4PX  | -0.06531 |
|    |   | 4PY  | 0.08447  |
|    |   | 4PZ  | -0.09872 |
|    |   | 5D 0 | -0.00337 |
|    |   | 5D+1 | -0.00195 |
|    |   | 5D-1 | -0.00064 |
|    |   | 5D+2 | -0.00232 |
|    |   | 5D-2 | -0.00124 |

.....

**302(LUMO+16)**

|   |   |      |          |
|---|---|------|----------|
| 1 | W | 1S   | 0.00079  |
|   |   | 2S   | 0.00830  |
|   |   | 3S   | 0.19666  |
|   |   | 4PX  | -0.02751 |
|   |   | 4PY  | -0.04632 |
|   |   | 4PZ  | 0.05552  |
|   |   | 5PX  | 0.01731  |
|   |   | 5PY  | -0.00407 |
|   |   | 5PZ  | -0.05241 |
|   |   | 6PX  | -0.08643 |
|   |   | 6PY  | -0.12565 |
|   |   | 6PZ  | 0.09308  |
|   |   | 7D 0 | 0.13934  |
|   |   | 7D+1 | -0.24513 |
|   |   | 7D-1 | 0.01891  |
|   |   | 7D+2 | 0.00844  |
|   |   | 7D-2 | 0.06051  |
|   |   | 8D 0 | 0.07599  |
|   |   | 8D+1 | -0.16424 |
|   |   | 8D-1 | 0.03517  |
|   |   | 8D+2 | -0.01057 |
|   |   | 8D-2 | 0.04297  |
|   |   | 9F 0 | 0.00112  |

|    |   |      |          |
|----|---|------|----------|
|    |   | 9F+1 | -0.00157 |
|    |   | 9F-1 | 0.00075  |
|    |   | 9F+2 | 0.00179  |
|    |   | 9F-2 | 0.00430  |
|    |   | 9F+3 | 0.00273  |
|    |   | 9F-3 | 0.00323  |
| 12 | S | 1S   | 0.00264  |
|    |   | 2S   | -0.01010 |
|    |   | 2PX  | 0.01296  |
|    |   | 2PY  | 0.01763  |
|    |   | 2PZ  | -0.03046 |
|    |   | 3S   | 0.03561  |
|    |   | 3PX  | -0.03483 |
|    |   | 3PY  | -0.04674 |
|    |   | 3PZ  | 0.08351  |
|    |   | 4S   | -0.00355 |
|    |   | 4PX  | -0.04491 |
|    |   | 4PY  | -0.08061 |
|    |   | 4PZ  | 0.07151  |
|    |   | 5D 0 | -0.01174 |
|    |   | 5D+1 | -0.00047 |
|    |   | 5D-1 | -0.00571 |
|    |   | 5D+2 | -0.01259 |
|    |   | 5D-2 | 0.00813  |
| 14 | S | 1S   | 0.00413  |
|    |   | 2S   | -0.02016 |
|    |   | 2PX  | 0.01225  |
|    |   | 2PY  | 0.02305  |
|    |   | 2PZ  | -0.03140 |
|    |   | 3S   | 0.04043  |
|    |   | 3PX  | -0.03112 |
|    |   | 3PY  | -0.06330 |
|    |   | 3PZ  | 0.08541  |
|    |   | 4S   | 0.14419  |
|    |   | 4PX  | -0.03231 |
|    |   | 4PY  | -0.09123 |
|    |   | 4PZ  | 0.11259  |
|    |   | 5D 0 | -0.00667 |
|    |   | 5D+1 | -0.00231 |
|    |   | 5D-1 | 0.01201  |
|    |   | 5D+2 | 0.01120  |
|    |   | 5D-2 | -0.00638 |
| 17 | S | 1S   | 0.00024  |
|    |   | 2S   | 0.00203  |

|    |   |      |          |
|----|---|------|----------|
|    |   | 2PX  | 0.00163  |
|    |   | 2PY  | 0.02249  |
|    |   | 2PZ  | -0.03546 |
|    |   | 3S   | 0.01355  |
|    |   | 3PX  | -0.00160 |
|    |   | 3PY  | -0.05961 |
|    |   | 3PZ  | 0.09278  |
|    |   | 4S   | -0.06332 |
|    |   | 4PX  | -0.03403 |
|    |   | 4PY  | -0.09573 |
|    |   | 4PZ  | 0.15467  |
|    |   | 5D 0 | 0.01179  |
|    |   | 5D+1 | -0.02038 |
|    |   | 5D-1 | -0.00839 |
|    |   | 5D+2 | 0.00206  |
|    |   | 5D-2 | 0.00535  |
| 19 | S | 1S   | 0.00466  |
|    |   | 2S   | -0.02185 |
|    |   | 2PX  | 0.02059  |
|    |   | 2PY  | 0.02598  |
|    |   | 2PZ  | -0.03370 |
|    |   | 3S   | 0.04843  |
|    |   | 3PX  | -0.05746 |
|    |   | 3PY  | -0.07077 |
|    |   | 3PZ  | 0.08977  |
|    |   | 4S   | 0.12372  |
|    |   | 4PX  | -0.07682 |
|    |   | 4PY  | -0.08797 |
|    |   | 4PZ  | 0.11202  |
|    |   | 5D 0 | 0.01086  |
|    |   | 5D+1 | 0.01237  |
|    |   | 5D-1 | 0.00673  |
|    |   | 5D+2 | 0.00284  |
|    |   | 5D-2 | -0.00905 |
| 4  | W | 1S   | 0.00002  |
|    |   | 2S   | -0.00810 |
|    |   | 3S   | -0.03764 |
|    |   | 4PX  | 0.08584  |
|    |   | 4PY  | -0.07500 |
|    |   | 4PZ  | 0.04609  |
|    |   | 5PX  | -0.00638 |
|    |   | 5PY  | -0.00413 |
|    |   | 5PZ  | -0.01550 |

|    |      |          |
|----|------|----------|
|    | 6PX  | 0.14774  |
|    | 6PY  | -0.05428 |
|    | 6PZ  | 0.07804  |
|    | 7D 0 | -0.02867 |
|    | 7D+1 | 0.03557  |
|    | 7D-1 | -0.15219 |
|    | 7D+2 | 0.30348  |
|    | 7D-2 | 0.28928  |
|    | 8D 0 | -0.01776 |
|    | 8D+1 | 0.00172  |
|    | 8D-1 | -0.09613 |
|    | 8D+2 | 0.20572  |
|    | 8D-2 | 0.21597  |
|    | 9F 0 | -0.00015 |
|    | 9F+1 | 0.00258  |
|    | 9F-1 | -0.00209 |
|    | 9F+2 | -0.00192 |
|    | 9F-2 | -0.00441 |
|    | 9F+3 | 0.00070  |
|    | 9F-3 | -0.00091 |
| 20 | S 1S | -0.00191 |
|    | 2S   | 0.01080  |
|    | 2PX  | -0.03841 |
|    | 2PY  | 0.03488  |
|    | 2PZ  | -0.02129 |
|    | 3S   | -0.01348 |
|    | 3PX  | 0.10223  |
|    | 3PY  | -0.09369 |
|    | 3PZ  | 0.05718  |
|    | 4S   | -0.11447 |
|    | 4PX  | 0.11508  |
|    | 4PY  | -0.13844 |
|    | 4PZ  | 0.09801  |
|    | 5D 0 | 0.00649  |
|    | 5D+1 | 0.01623  |
|    | 5D-1 | -0.02023 |
|    | 5D+2 | -0.01393 |
|    | 5D-2 | -0.00572 |
| 23 | S 1S | -0.00405 |
|    | 2S   | 0.02238  |
|    | 2PX  | -0.04649 |
|    | 2PY  | 0.02670  |
|    | 2PZ  | -0.01838 |
|    | 3S   | -0.03042 |

|    |      |          |          |
|----|------|----------|----------|
|    | 3PX  | 0.12459  |          |
|    | 3PY  | -0.07090 |          |
|    | 3PZ  | 0.05020  |          |
|    | 4S   | -0.20533 |          |
|    | 4PX  | 0.21715  |          |
|    | 4PY  | -0.08517 |          |
|    | 4PZ  | 0.06488  |          |
|    | 5D 0 | -0.00355 |          |
|    | 5D+1 | 0.01647  |          |
|    | 5D-1 | -0.00747 |          |
|    | 5D+2 | 0.02084  |          |
|    | 5D-2 | -0.00962 |          |
| 25 | S    | 1S       | 0.00510  |
|    |      | 2S       | -0.02852 |
|    |      | 2PX      | -0.04393 |
|    |      | 2PY      | 0.04117  |
|    |      | 2PZ      | -0.01766 |
|    |      | 3S       | 0.03679  |
|    |      | 3PX      | 0.11816  |
|    |      | 3PY      | -0.11047 |
|    |      | 3PZ      | 0.04656  |
|    |      | 4S       | 0.26560  |
|    |      | 4PX      | 0.18785  |
|    |      | 4PY      | -0.21429 |
|    |      | 4PZ      | 0.05902  |
|    |      | 5D 0     | 0.01198  |
|    |      | 5D+1     | -0.00340 |
|    |      | 5D-1     | 0.00601  |
|    |      | 5D+2     | 0.00367  |
|    |      | 5D-2     | 0.02638  |
| 27 | S    | 1S       | 0.00334  |
|    |      | 2S       | -0.01551 |
|    |      | 2PX      | -0.02736 |
|    |      | 2PY      | 0.02465  |
|    |      | 2PZ      | -0.02181 |
|    |      | 3S       | 0.03517  |
|    |      | 3PX      | 0.07198  |
|    |      | 3PY      | -0.06595 |
|    |      | 3PZ      | 0.05916  |
|    |      | 4S       | 0.07941  |
|    |      | 4PX      | 0.11305  |
|    |      | 4PY      | -0.07833 |
|    |      | 4PZ      | 0.08805  |
|    |      | 5D 0     | -0.01136 |

|    |   |                    |          |
|----|---|--------------------|----------|
|    |   | 5D+1               | -0.02366 |
|    |   | 5D-1               | 0.01242  |
|    |   | 5D+2               | -0.00359 |
|    |   | 5D-2               | 0.00211  |
|    |   | <b>277(HOMO-8)</b> |          |
| 12 | S | 1S                 | 0.00013  |
|    |   | 2S                 | -0.00102 |
|    |   | 2PX                | 0.03009  |
|    |   | 2PY                | 0.03911  |
|    |   | 2PZ                | -0.06049 |
|    |   | 3S                 | -0.00020 |
|    |   | 3PX                | -0.07871 |
|    |   | 3PY                | -0.10327 |
|    |   | 3PZ                | 0.15818  |
|    |   | 4S                 | 0.00150  |
|    |   | 4PX                | -0.05361 |
|    |   | 4PY                | -0.06049 |
|    |   | 4PZ                | 0.10630  |
|    |   | 5D 0               | 0.00231  |
|    |   | 5D+1               | 0.00020  |
|    |   | 5D-1               | 0.00281  |
|    |   | 5D+2               | 0.00244  |
|    |   | 5D-2               | -0.00089 |
| 14 | S | 1S                 | 0.00006  |
|    |   | 2S                 | -0.00058 |
|    |   | 2PX                | -0.05315 |
|    |   | 2PY                | 0.00459  |
|    |   | 2PZ                | 0.05310  |
|    |   | 3S                 | -0.00035 |
|    |   | 3PX                | 0.13943  |
|    |   | 3PY                | -0.01242 |
|    |   | 3PZ                | -0.13833 |
|    |   | 4S                 | 0.02037  |
|    |   | 4PX                | 0.09453  |
|    |   | 4PY                | -0.01255 |
|    |   | 4PZ                | -0.09113 |
|    |   | 5D 0               | -0.00270 |
|    |   | 5D+1               | 0.00008  |
|    |   | 5D-1               | 0.00091  |
|    |   | 5D+2               | 0.00159  |
|    |   | 5D-2               | -0.00285 |
| 17 | S | 1S                 | -0.00120 |
|    |   | 2S                 | 0.00570  |



|    |      |          |          |
|----|------|----------|----------|
|    | 2PX  | 0.01653  |          |
|    | 2PY  | -0.08460 |          |
|    | 2PZ  | 0.00389  |          |
|    | 3S   | -0.01185 |          |
|    | 3PX  | -0.04346 |          |
|    | 3PY  | 0.22236  |          |
|    | 3PZ  | -0.01050 |          |
|    | 4S   | -0.01340 |          |
|    | 4PX  | -0.02966 |          |
|    | 4PY  | 0.14612  |          |
|    | 4PZ  | -0.00135 |          |
|    | 5D 0 | 0.00069  |          |
|    | 5D+1 | 0.00287  |          |
|    | 5D-1 | 0.00030  |          |
|    | 5D+2 | -0.00055 |          |
|    | 5D-2 | 0.00566  |          |
| 29 | S    | 1S       | 0.00019  |
|    |      | 2S       | -0.00096 |
|    |      | 2PX      | 0.07742  |
|    |      | 2PY      | -0.01354 |
|    |      | 2PZ      | 0.05548  |
|    |      | 3S       | 0.00155  |
|    |      | 3PX      | -0.20435 |
|    |      | 3PY      | 0.03564  |
|    |      | 3PZ      | -0.14441 |
|    |      | 4S       | -0.02552 |
|    |      | 4PX      | -0.13798 |
|    |      | 4PY      | 0.02157  |
|    |      | 4PZ      | -0.08682 |
|    |      | 5D 0     | 0.00405  |
|    |      | 5D+1     | 0.00311  |
|    |      | 5D-1     | -0.00115 |
|    |      | 5D+2     | -0.00003 |
|    |      | 5D-2     | 0.00055  |
| 31 | S    | 1S       | -0.00012 |
|    |      | 2S       | 0.00112  |
|    |      | 2PX      | 0.03106  |
|    |      | 2PY      | -0.03739 |
|    |      | 2PZ      | -0.11010 |
|    |      | 3S       | 0.00102  |
|    |      | 3PX      | -0.08217 |
|    |      | 3PY      | 0.09878  |
|    |      | 3PZ      | 0.28941  |
|    |      | 4S       | -0.00516 |

|      |      |          |
|------|------|----------|
|      | 4PX  | -0.05112 |
|      | 4PY  | 0.05996  |
|      | 4PZ  | 0.18741  |
|      | 5D 0 | -0.00344 |
|      | 5D+1 | -0.00663 |
|      | 5D-1 | -0.00123 |
|      | 5D+2 | 0.00193  |
|      | 5D-2 | -0.00184 |
| 35 S | 1S   | 0.00028  |
|      | 2S   | -0.00129 |
|      | 2PX  | -0.05838 |
|      | 2PY  | 0.01748  |
|      | 2PZ  | 0.00051  |
|      | 3S   | 0.00302  |
|      | 3PX  | 0.15388  |
|      | 3PY  | -0.04481 |
|      | 3PZ  | -0.00095 |
|      | 4S   | 0.02646  |
|      | 4PX  | 0.09732  |
|      | 4PY  | -0.02296 |
|      | 4PZ  | 0.00516  |
|      | 5D 0 | 0.00028  |
|      | 5D+1 | 0.00131  |
|      | 5D-1 | 0.00017  |
|      | 5D+2 | 0.00014  |
|      | 5D-2 | 0.00328  |

.....

**298(LUMO+12)**

|     |      |          |
|-----|------|----------|
| 3 W | 1S   | 0.00045  |
|     | 2S   | 0.00052  |
|     | 3S   | 0.05574  |
|     | 4PX  | 0.00553  |
|     | 4PY  | 0.00244  |
|     | 4PZ  | 0.07761  |
|     | 5PX  | -0.01658 |
|     | 5PY  | -0.00526 |
|     | 5PZ  | -0.05216 |
|     | 6PX  | 0.01687  |
|     | 6PY  | -0.00656 |
|     | 6PZ  | 0.06847  |
|     | 7D 0 | -0.00298 |
|     | 7D+1 | -0.08527 |
|     | 7D-1 | -0.11218 |

|    |   |      |          |
|----|---|------|----------|
|    |   | 7D+2 | 0.25683  |
|    |   | 7D-2 | -0.08359 |
|    |   | 8D 0 | 0.00517  |
|    |   | 8D+1 | -0.05882 |
|    |   | 8D-1 | -0.06028 |
|    |   | 8D+2 | 0.17038  |
|    |   | 8D-2 | -0.04879 |
|    |   | 9F 0 | 0.00268  |
|    |   | 9F+1 | 0.00083  |
|    |   | 9F-1 | -0.00287 |
|    |   | 9F+2 | 0.00065  |
|    |   | 9F-2 | -0.00059 |
|    |   | 9F+3 | 0.00007  |
|    |   | 9F-3 | -0.00107 |
| 21 | S | 1S   | 0.00196  |
|    |   | 2S   | -0.01035 |
|    |   | 2PX  | -0.00496 |
|    |   | 2PY  | -0.00141 |
|    |   | 2PZ  | -0.03911 |
|    |   | 3S   | 0.01615  |
|    |   | 3PX  | 0.01323  |
|    |   | 3PY  | 0.00317  |
|    |   | 3PZ  | 0.10447  |
|    |   | 4S   | 0.08686  |
|    |   | 4PX  | 0.01405  |
|    |   | 4PY  | -0.01379 |
|    |   | 4PZ  | 0.13760  |
|    |   | 5D 0 | -0.01528 |
|    |   | 5D+1 | -0.00254 |
|    |   | 5D-1 | 0.01257  |
|    |   | 5D+2 | -0.00045 |
|    |   | 5D-2 | 0.00061  |
| 22 | S | 1S   | -0.00065 |
|    |   | 2S   | 0.00521  |
|    |   | 2PX  | -0.00798 |
|    |   | 2PY  | 0.00298  |
|    |   | 2PZ  | -0.03120 |
|    |   | 3S   | 0.00090  |
|    |   | 3PX  | 0.02092  |
|    |   | 3PY  | -0.00765 |
|    |   | 3PZ  | 0.08278  |
|    |   | 4S   | -0.06805 |
|    |   | 4PX  | 0.04545  |
|    |   | 4PY  | -0.01854 |

|    |   |      |          |
|----|---|------|----------|
|    |   | 4PZ  | 0.10966  |
|    |   | 5D 0 | 0.01274  |
|    |   | 5D+1 | 0.01444  |
|    |   | 5D-1 | -0.00504 |
|    |   | 5D+2 | 0.00660  |
|    |   | 5D-2 | 0.00311  |
| 24 | S | 1S   | -0.00167 |
|    |   | 2S   | 0.01028  |
|    |   | 2PX  | 0.00229  |
|    |   | 2PY  | -0.00155 |
|    |   | 2PZ  | -0.03589 |
|    |   | 3S   | -0.00884 |
|    |   | 3PX  | -0.00550 |
|    |   | 3PY  | 0.00422  |
|    |   | 3PZ  | 0.09563  |
|    |   | 4S   | -0.10976 |
|    |   | 4PX  | -0.04135 |
|    |   | 4PY  | 0.00352  |
|    |   | 4PZ  | 0.14096  |
|    |   | 5D 0 | 0.01714  |
|    |   | 5D+1 | -0.00896 |
|    |   | 5D-1 | 0.00093  |
|    |   | 5D+2 | 0.00061  |
|    |   | 5D-2 | -0.00624 |
| 26 | S | 1S   | 0.00376  |
|    |   | 2S   | -0.01954 |
|    |   | 2PX  | -0.00870 |
|    |   | 2PY  | -0.01201 |
|    |   | 2PZ  | -0.03826 |
|    |   | 3S   | 0.03235  |
|    |   | 3PX  | 0.02464  |
|    |   | 3PY  | 0.03238  |
|    |   | 3PZ  | 0.10324  |
|    |   | 4S   | 0.14121  |
|    |   | 4PX  | 0.01919  |
|    |   | 4PY  | 0.06243  |
|    |   | 4PZ  | 0.13782  |
|    |   | 5D 0 | -0.01587 |
|    |   | 5D+1 | -0.00578 |
|    |   | 5D-1 | -0.01023 |
|    |   | 5D+2 | 0.00411  |
|    |   | 5D-2 | -0.00127 |

.....

**Cartesian coordinates of cluster 2:**

|    |              |              |             |
|----|--------------|--------------|-------------|
| W  | -9.48832810  | -42.41988190 | -4.18381040 |
| W  | 3.38467190   | -42.41988190 | -4.18381040 |
| W  | -4.06143600  | -44.93448520 | -3.81177330 |
| W  | 8.81156400   | -44.93448520 | -3.81177330 |
| W  | 1.08362260   | -47.84506080 | -3.25532410 |
| W  | 13.95662260  | -47.84506080 | -3.25532410 |
| Ag | -1.53625920  | -46.47605710 | -3.59523360 |
| Ag | 11.33674080  | -46.47605710 | -3.59523360 |
| Ag | -6.75863440  | -43.62511080 | -3.87699230 |
| Ag | 6.11436560   | -43.62511080 | -3.87699230 |
| Ag | 2.21517700   | -45.10210710 | -3.59716130 |
| S  | 4.04855350   | -44.27773710 | -5.24466210 |
| S  | -8.82444650  | -44.27773710 | -5.24466210 |
| S  | 13.48841910  | -46.53623610 | -5.01125550 |
| S  | 0.61541910   | -46.53623610 | -5.01125550 |
| S  | 8.25698920   | -43.36790740 | -5.23775470 |
| S  | -4.61601080  | -43.36790740 | -5.23775470 |
| S  | 2.81880190   | -40.99124870 | -5.68962870 |
| S  | -10.05432680 | -40.99124870 | -5.68962870 |
| S  | 2.46955200   | -46.92286560 | -1.85006500 |
| S  | 15.34255200  | -46.92286560 | -1.85006500 |
| S  | -0.74706250  | -48.42706610 | -2.16298740 |
| S  | 12.12593750  | -48.42706610 | -2.16298740 |
| S  | -11.24906690 | -42.75155340 | -2.89886900 |
| S  | 1.62393310   | -42.75155340 | -2.89886900 |
| S  | 9.23862490   | -46.79206560 | -4.94185990 |
| S  | -3.63437510  | -46.79206560 | -4.94185990 |
| S  | -7.89586590  | -41.52269250 | -2.95589540 |
| S  | 4.97713410   | -41.52269250 | -2.95589540 |
| S  | -2.31827820  | -44.21838240 | -2.68746970 |
| S  | 10.55472180  | -44.21838240 | -2.68746970 |
| S  | -5.66217170  | -45.38871300 | -2.36812180 |
| S  | 7.21082830   | -45.38871300 | -2.36812180 |
| S  | 1.99773350   | -49.64768330 | -3.99184820 |
| S  | 14.87073350  | -49.64768330 | -3.99184820 |

**Cluster 2 B3LYP/LanL2DZf+6-31Gd TD-PCM (300 states) in DMF (dielectric constant=36.71)**

Excitation energies and oscillator strengths:

|               |           |           |           |           |          |
|---------------|-----------|-----------|-----------|-----------|----------|
| Excited State | 1:        | Singlet-A | 2.5347 eV | 489.15 nm | f=0.0012 |
|               | 282 ->286 |           | -0.16965  |           |          |

|           |          |
|-----------|----------|
| 283 ->286 | 0.22441  |
| 283 ->287 | 0.10957  |
| 284 ->286 | 0.36553  |
| 284 ->287 | 0.16082  |
| 285 ->286 | -0.31698 |
| 285 ->287 | -0.14751 |

This state for optimization and/or second-order correction.

Total Energy, E(RPA) = -10694.8123114

Copying the excited state density for this state as the 1-particle RhoCI density.

|               |    |           |           |           |          |
|---------------|----|-----------|-----------|-----------|----------|
| Excited State | 2: | Singlet-A | 2.5598 eV | 484.34 nm | f=0.0010 |
| 275 ->287     |    | 0.11917   |           |           |          |
| 282 ->286     |    | -0.18662  |           |           |          |
| 282 ->287     |    | 0.38446   |           |           |          |
| 285 ->286     |    | 0.12247   |           |           |          |
| 285 ->287     |    | -0.37255  |           |           |          |
| 285 ->289     |    | 0.12087   |           |           |          |
| 285 ->293     |    | 0.10051   |           |           |          |

|               |    |           |           |           |          |
|---------------|----|-----------|-----------|-----------|----------|
| Excited State | 3: | Singlet-A | 2.5637 eV | 483.62 nm | f=0.0022 |
| 276 ->287     |    | 0.11198   |           |           |          |
| 277 ->287     |    | 0.10100   |           |           |          |
| 278 ->286     |    | -0.12412  |           |           |          |
| 278 ->287     |    | 0.12946   |           |           |          |
| 281 ->287     |    | -0.13086  |           |           |          |
| 282 ->287     |    | 0.25560   |           |           |          |
| 283 ->286     |    | -0.23289  |           |           |          |
| 283 ->287     |    | 0.32324   |           |           |          |
| 285 ->287     |    | 0.23015   |           |           |          |

|               |    |           |           |           |          |
|---------------|----|-----------|-----------|-----------|----------|
| Excited State | 4: | Singlet-A | 2.5647 eV | 483.43 nm | f=0.0014 |
| 276 ->286     |    | 0.18441   |           |           |          |
| 278 ->286     |    | -0.13623  |           |           |          |
| 278 ->287     |    | -0.12748  |           |           |          |
| 282 ->286     |    | 0.11042   |           |           |          |
| 283 ->286     |    | -0.15002  |           |           |          |
| 283 ->287     |    | -0.20635  |           |           |          |
| 284 ->286     |    | 0.33907   |           |           |          |
| 284 ->287     |    | 0.13001   |           |           |          |
| 285 ->286     |    | 0.24940   |           |           |          |
| 285 ->290     |    | 0.12079   |           |           |          |

|               |    |           |           |           |          |
|---------------|----|-----------|-----------|-----------|----------|
| Excited State | 5: | Singlet-A | 2.6342 eV | 470.67 nm | f=0.0005 |
| 276 ->288     |    | 0.12015   |           |           |          |

|                  |           |           |           |          |  |
|------------------|-----------|-----------|-----------|----------|--|
| 281 ->288        | 0.16491   |           |           |          |  |
| 281 ->289        | 0.30313   |           |           |          |  |
| 281 ->290        | -0.11630  |           |           |          |  |
| 281 ->293        | -0.16081  |           |           |          |  |
| 283 ->289        | 0.11378   |           |           |          |  |
| 285 ->288        | -0.16240  |           |           |          |  |
| 285 ->289        | -0.29120  |           |           |          |  |
| 285 ->290        | 0.12662   |           |           |          |  |
| 285 ->293        | 0.15683   |           |           |          |  |
| Excited State 6: | Singlet-A | 2.6588 eV | 466.32 nm | f=0.0009 |  |
| 268 ->289        | -0.11765  |           |           |          |  |
| 278 ->288        | 0.13862   |           |           |          |  |
| 281 ->289        | 0.11688   |           |           |          |  |
| 281 ->290        | 0.17693   |           |           |          |  |
| 281 ->291        | -0.21362  |           |           |          |  |
| 281 ->292        | 0.22186   |           |           |          |  |
| 285 ->289        | -0.13647  |           |           |          |  |
| 285 ->290        | -0.17406  |           |           |          |  |
| 285 ->291        | 0.22202   |           |           |          |  |
| 285 ->292        | -0.20012  |           |           |          |  |
| Excited State 7: | Singlet-A | 2.6726 eV | 463.90 nm | f=0.0039 |  |
| 276 ->288        | -0.12553  |           |           |          |  |
| 281 ->286        | -0.12355  |           |           |          |  |
| 281 ->287        | -0.12211  |           |           |          |  |
| 281 ->288        | -0.28143  |           |           |          |  |
| 281 ->289        | 0.14154   |           |           |          |  |
| 282 ->288        | -0.10137  |           |           |          |  |
| 283 ->288        | -0.16256  |           |           |          |  |
| 285 ->288        | 0.33670   |           |           |          |  |
| 285 ->289        | -0.14479  |           |           |          |  |
| 285 ->293        | 0.10106   |           |           |          |  |
| Excited State 8: | Singlet-A | 2.6999 eV | 459.22 nm | f=0.0006 |  |
| 272 ->286        | 0.10529   |           |           |          |  |
| 273 ->286        | 0.18034   |           |           |          |  |
| 273 ->287        | 0.14458   |           |           |          |  |
| 274 ->286        | -0.15446  |           |           |          |  |
| 274 ->287        | 0.32972   |           |           |          |  |
| 275 ->287        | 0.13267   |           |           |          |  |
| 276 ->288        | 0.13230   |           |           |          |  |
| 276 ->290        | 0.12398   |           |           |          |  |
| 277 ->286        | -0.13430  |           |           |          |  |

|                   |           |           |           |          |  |
|-------------------|-----------|-----------|-----------|----------|--|
| 278 ->288         | 0.21070   |           |           |          |  |
| 278 ->289         | 0.11796   |           |           |          |  |
| Excited State 9:  | Singlet-A | 2.7016 eV | 458.93 nm | f=0.0001 |  |
| 272 ->286         | 0.13322   |           |           |          |  |
| 272 ->287         | 0.17234   |           |           |          |  |
| 273 ->286         | 0.45944   |           |           |          |  |
| 273 ->287         | 0.17473   |           |           |          |  |
| 274 ->286         | 0.10785   |           |           |          |  |
| 274 ->287         | -0.23099  |           |           |          |  |
| 277 ->287         | -0.10932  |           |           |          |  |
| 278 ->286         | 0.12056   |           |           |          |  |
| Excited State 10: | Singlet-A | 2.7064 eV | 458.11 nm | f=0.0008 |  |
| 272 ->286         | 0.14667   |           |           |          |  |
| 272 ->287         | -0.11432  |           |           |          |  |
| 273 ->287         | 0.12826   |           |           |          |  |
| 274 ->286         | -0.13263  |           |           |          |  |
| 274 ->287         | 0.31427   |           |           |          |  |
| 274 ->290         | -0.10425  |           |           |          |  |
| 276 ->288         | -0.14530  |           |           |          |  |
| 276 ->290         | -0.15258  |           |           |          |  |
| 278 ->288         | -0.25646  |           |           |          |  |
| 278 ->289         | -0.12612  |           |           |          |  |
| Excited State 11: | Singlet-A | 2.7147 eV | 456.72 nm | f=0.0010 |  |
| 269 ->288         | 0.10589   |           |           |          |  |
| 272 ->286         | 0.13136   |           |           |          |  |
| 273 ->286         | 0.13889   |           |           |          |  |
| 276 ->289         | 0.12000   |           |           |          |  |
| 277 ->286         | 0.10358   |           |           |          |  |
| 277 ->288         | 0.34311   |           |           |          |  |
| 278 ->286         | -0.11706  |           |           |          |  |
| 278 ->290         | 0.22995   |           |           |          |  |
| 281 ->288         | -0.14261  |           |           |          |  |
| 284 ->288         | 0.12759   |           |           |          |  |
| 285 ->288         | 0.14016   |           |           |          |  |
| Excited State 12: | Singlet-A | 2.7334 eV | 453.58 nm | f=0.0003 |  |
| 271 ->291         | -0.11713  |           |           |          |  |
| 276 ->286         | -0.12930  |           |           |          |  |
| 276 ->288         | -0.17617  |           |           |          |  |
| 276 ->290         | 0.12217   |           |           |          |  |
| 277 ->288         | 0.21681   |           |           |          |  |



|                   |           |           |           |          |
|-------------------|-----------|-----------|-----------|----------|
| 284 ->290         | 0.19725   |           |           |          |
| 284 ->291         | -0.12505  |           |           |          |
| 284 ->292         | -0.18013  |           |           |          |
| 284 ->293         | -0.10280  |           |           |          |
| Excited State 13: | Singlet-A | 2.7440 eV | 451.83 nm | f=0.0002 |
| 271 ->286         | 0.10933   |           |           |          |
| 271 ->290         | -0.10473  |           |           |          |
| 275 ->288         | 0.14858   |           |           |          |
| 276 ->286         | -0.10149  |           |           |          |
| 276 ->288         | -0.19241  |           |           |          |
| 276 ->291         | 0.13135   |           |           |          |
| 277 ->286         | 0.11418   |           |           |          |
| 277 ->288         | 0.10619   |           |           |          |
| 281 ->291         | 0.12647   |           |           |          |
| 284 ->291         | 0.11025   |           |           |          |
| 284 ->292         | 0.20077   |           |           |          |
| 285 ->288         | -0.12067  |           |           |          |
| 285 ->289         | -0.10095  |           |           |          |
| 285 ->292         | 0.14359   |           |           |          |
| Excited State 14: | Singlet-A | 2.7490 eV | 451.02 nm | f=0.0011 |
| 276 ->288         | -0.14427  |           |           |          |
| 282 ->286         | 0.13689   |           |           |          |
| 282 ->287         | -0.12180  |           |           |          |
| 283 ->289         | 0.13588   |           |           |          |
| 283 ->293         | 0.15952   |           |           |          |
| 284 ->292         | 0.10844   |           |           |          |
| 284 ->293         | 0.10499   |           |           |          |
| 285 ->289         | 0.15406   |           |           |          |
| 285 ->290         | 0.12384   |           |           |          |
| 285 ->292         | -0.14976  |           |           |          |
| 285 ->293         | 0.23449   |           |           |          |
| Excited State 15: | Singlet-A | 2.7579 eV | 449.55 nm | f=0.0030 |
| 277 ->288         | 0.12517   |           |           |          |
| 277 ->290         | 0.12485   |           |           |          |
| 277 ->291         | 0.19147   |           |           |          |
| 281 ->286         | 0.20863   |           |           |          |
| 281 ->287         | -0.16457  |           |           |          |
| 282 ->287         | 0.13776   |           |           |          |
| 283 ->289         | -0.14555  |           |           |          |
| 283 ->292         | 0.11642   |           |           |          |
| 283 ->293         | -0.11819  |           |           |          |

|                   |           |           |           |          |  |
|-------------------|-----------|-----------|-----------|----------|--|
| 285 ->290         | 0.15762   |           |           |          |  |
| 285 ->293         | -0.13540  |           |           |          |  |
| Excited State 16: | Singlet-A | 2.7786 eV | 446.21 nm | f=0.0003 |  |
| 269 ->288         | -0.10626  |           |           |          |  |
| 271 ->288         | -0.15719  |           |           |          |  |
| 272 ->288         | -0.10339  |           |           |          |  |
| 275 ->291         | 0.10736   |           |           |          |  |
| 276 ->291         | -0.13028  |           |           |          |  |
| 277 ->288         | 0.14625   |           |           |          |  |
| 277 ->290         | 0.19523   |           |           |          |  |
| 277 ->291         | 0.20092   |           |           |          |  |
| 281 ->286         | -0.14393  |           |           |          |  |
| 281 ->291         | 0.10453   |           |           |          |  |
| 283 ->290         | 0.10183   |           |           |          |  |
| 283 ->292         | -0.11791  |           |           |          |  |
| 285 ->286         | 0.12903   |           |           |          |  |
| 285 ->290         | -0.15192  |           |           |          |  |
| 285 ->292         | 0.15560   |           |           |          |  |
| Excited State 17: | Singlet-A | 2.7819 eV | 445.68 nm | f=0.0010 |  |
| 278 ->296         | -0.11266  |           |           |          |  |
| 279 ->294         | 0.15102   |           |           |          |  |
| 281 ->294         | 0.10797   |           |           |          |  |
| 282 ->294         | -0.27901  |           |           |          |  |
| 283 ->294         | -0.27897  |           |           |          |  |
| 283 ->296         | 0.36416   |           |           |          |  |
| 285 ->296         | 0.25019   |           |           |          |  |
| Excited State 18: | Singlet-A | 2.7917 eV | 444.12 nm | f=0.0001 |  |
| 279 ->287         | -0.18681  |           |           |          |  |
| 279 ->294         | 0.62823   |           |           |          |  |
| 283 ->294         | 0.11291   |           |           |          |  |
| Excited State 19: | Singlet-A | 2.7997 eV | 442.84 nm | f=0.0005 |  |
| 284 ->295         | 0.40430   |           |           |          |  |
| 284 ->297         | -0.40540  |           |           |          |  |
| 285 ->295         | -0.10963  |           |           |          |  |
| Excited State 20: | Singlet-A | 2.8055 eV | 441.93 nm | f=0.0028 |  |
| 282 ->289         | -0.11278  |           |           |          |  |
| 282 ->291         | 0.15405   |           |           |          |  |
| 282 ->292         | 0.15926   |           |           |          |  |
| 282 ->293         | -0.14713  |           |           |          |  |

|                   |           |           |           |          |  |
|-------------------|-----------|-----------|-----------|----------|--|
| 283 ->289         | -0.13995  |           |           |          |  |
| 283 ->293         | -0.15282  |           |           |          |  |
| 284 ->290         | 0.12553   |           |           |          |  |
| 284 ->295         | 0.12229   |           |           |          |  |
| 284 ->297         | -0.14869  |           |           |          |  |
| 285 ->287         | 0.14305   |           |           |          |  |
| 285 ->289         | 0.11587   |           |           |          |  |
| 285 ->292         | 0.10599   |           |           |          |  |
| 285 ->293         | 0.17860   |           |           |          |  |
| Excited State 21: | Singlet-A | 2.8192 eV | 439.78 nm | f=0.0041 |  |
| 280 ->295         | -0.11668  |           |           |          |  |
| 281 ->286         | 0.19841   |           |           |          |  |
| 282 ->289         | 0.18104   |           |           |          |  |
| 282 ->293         | 0.17578   |           |           |          |  |
| 282 ->296         | -0.12171  |           |           |          |  |
| 283 ->287         | -0.17535  |           |           |          |  |
| 283 ->291         | -0.12749  |           |           |          |  |
| 283 ->292         | -0.10617  |           |           |          |  |
| 283 ->294         | 0.13768   |           |           |          |  |
| 284 ->290         | 0.10119   |           |           |          |  |
| 285 ->291         | 0.16278   |           |           |          |  |
| 285 ->292         | 0.13146   |           |           |          |  |
| 285 ->294         | 0.16067   |           |           |          |  |
| Excited State 22: | Singlet-A | 2.8287 eV | 438.31 nm | f=0.0007 |  |
| 280 ->286         | -0.18386  |           |           |          |  |
| 280 ->295         | 0.51287   |           |           |          |  |
| 281 ->296         | 0.10880   |           |           |          |  |
| 282 ->295         | 0.11266   |           |           |          |  |
| 282 ->296         | -0.13695  |           |           |          |  |
| 283 ->294         | 0.13007   |           |           |          |  |
| 283 ->295         | -0.11074  |           |           |          |  |
| 285 ->294         | 0.13502   |           |           |          |  |
| 285 ->295         | 0.10469   |           |           |          |  |
| Excited State 23: | Singlet-A | 2.8335 eV | 437.56 nm | f=0.0118 |  |
| 280 ->286         | -0.10505  |           |           |          |  |
| 280 ->295         | 0.27749   |           |           |          |  |
| 281 ->286         | 0.11035   |           |           |          |  |
| 281 ->294         | -0.12081  |           |           |          |  |
| 281 ->296         | -0.18307  |           |           |          |  |
| 282 ->289         | 0.10403   |           |           |          |  |
| 282 ->296         | 0.22900   |           |           |          |  |

|                   |           |           |           |          |  |
|-------------------|-----------|-----------|-----------|----------|--|
| 283 ->294         | -0.19635  |           |           |          |  |
| 285 ->291         | 0.13411   |           |           |          |  |
| 285 ->294         | -0.21110  |           |           |          |  |
| 285 ->296         | -0.15485  |           |           |          |  |
| Excited State 24: | Singlet-A | 2.8519 eV | 434.74 nm | f=0.0066 |  |
| 280 ->295         | -0.17850  |           |           |          |  |
| 280 ->297         | -0.12711  |           |           |          |  |
| 281 ->287         | -0.10776  |           |           |          |  |
| 281 ->295         | 0.10752   |           |           |          |  |
| 281 ->297         | 0.18113   |           |           |          |  |
| 282 ->295         | 0.15670   |           |           |          |  |
| 282 ->297         | 0.24094   |           |           |          |  |
| 283 ->295         | -0.16292  |           |           |          |  |
| 283 ->297         | -0.23771  |           |           |          |  |
| 284 ->295         | 0.24183   |           |           |          |  |
| 285 ->295         | 0.11890   |           |           |          |  |
| 285 ->297         | 0.23012   |           |           |          |  |
| Excited State 25: | Singlet-A | 2.8822 eV | 430.18 nm | f=0.0046 |  |
| 281 ->287         | 0.43153   |           |           |          |  |
| 281 ->288         | -0.11842  |           |           |          |  |
| 282 ->286         | 0.17479   |           |           |          |  |
| 282 ->296         | -0.10062  |           |           |          |  |
| 283 ->286         | -0.12630  |           |           |          |  |
| 283 ->287         | 0.21266   |           |           |          |  |
| Excited State 26: | Singlet-A | 2.9069 eV | 426.52 nm | f=0.0055 |  |
| 277 ->287         | 0.11616   |           |           |          |  |
| 278 ->287         | 0.17591   |           |           |          |  |
| 281 ->286         | 0.30561   |           |           |          |  |
| 281 ->290         | 0.21558   |           |           |          |  |
| 281 ->291         | 0.11363   |           |           |          |  |
| 282 ->286         | 0.15289   |           |           |          |  |
| 282 ->290         | 0.10649   |           |           |          |  |
| 283 ->287         | -0.17970  |           |           |          |  |
| 285 ->290         | -0.17400  |           |           |          |  |
| 285 ->291         | -0.15018  |           |           |          |  |
| Excited State 27: | Singlet-A | 2.9189 eV | 424.77 nm | f=0.0070 |  |
| 272 ->286         | -0.12708  |           |           |          |  |
| 275 ->286         | 0.13303   |           |           |          |  |
| 276 ->286         | -0.24632  |           |           |          |  |
| 276 ->287         | -0.13782  |           |           |          |  |

|           |          |
|-----------|----------|
| 277 ->286 | -0.14855 |
| 277 ->287 | -0.10190 |
| 278 ->286 | 0.25686  |
| 278 ->287 | 0.14035  |
| 278 ->290 | 0.11155  |
| 280 ->286 | 0.14884  |
| 284 ->286 | 0.15117  |
| 284 ->288 | -0.10653 |
| 284 ->289 | 0.15480  |
| 284 ->291 | 0.10737  |

Excited State 28: Singlet-A 2.9289 eV 423.31 nm f=0.0100

|           |          |
|-----------|----------|
| 272 ->287 | 0.10353  |
| 275 ->287 | 0.12389  |
| 276 ->286 | -0.10636 |
| 276 ->287 | 0.27016  |
| 278 ->286 | -0.12583 |
| 278 ->287 | 0.27968  |
| 278 ->289 | -0.11541 |
| 281 ->290 | -0.13552 |
| 283 ->289 | -0.14745 |
| 285 ->287 | -0.10654 |
| 285 ->291 | 0.12375  |

Excited State 29: Singlet-A 2.9444 eV 421.09 nm f=0.0014

|           |          |
|-----------|----------|
| 280 ->286 | 0.54835  |
| 280 ->287 | 0.25771  |
| 280 ->288 | -0.12460 |
| 280 ->295 | 0.23407  |

Excited State 30: Singlet-A 2.9692 eV 417.56 nm f=0.0001

|           |          |
|-----------|----------|
| 279 ->286 | -0.27716 |
| 279 ->287 | 0.59021  |
| 279 ->290 | -0.11687 |
| 279 ->294 | 0.21664  |

Excited State 31: Singlet-A 2.9821 eV 415.76 nm f=0.0211

|           |          |
|-----------|----------|
| 276 ->286 | -0.11663 |
| 276 ->288 | 0.15103  |
| 276 ->289 | -0.14528 |
| 277 ->289 | -0.13984 |
| 278 ->286 | 0.19841  |
| 278 ->289 | 0.12936  |
| 278 ->291 | 0.15154  |

|                   |           |           |           |          |  |
|-------------------|-----------|-----------|-----------|----------|--|
| 283 ->288         | 0.11037   |           |           |          |  |
| 284 ->286         | 0.18057   |           |           |          |  |
| 284 ->288         | 0.27342   |           |           |          |  |
| 284 ->292         | 0.17417   |           |           |          |  |
| 284 ->293         | 0.12380   |           |           |          |  |
| Excited State 32: | Singlet-A | 2.9933 eV | 414.20 nm | f=0.0124 |  |
| 276 ->286         | -0.11431  |           |           |          |  |
| 276 ->287         | 0.13873   |           |           |          |  |
| 276 ->291         | -0.15407  |           |           |          |  |
| 277 ->289         | 0.15379   |           |           |          |  |
| 277 ->291         | -0.10389  |           |           |          |  |
| 278 ->287         | 0.16968   |           |           |          |  |
| 278 ->288         | -0.12568  |           |           |          |  |
| 278 ->289         | 0.20174   |           |           |          |  |
| 278 ->291         | -0.12736  |           |           |          |  |
| 282 ->288         | -0.16165  |           |           |          |  |
| 283 ->288         | -0.16405  |           |           |          |  |
| 283 ->292         | 0.13298   |           |           |          |  |
| 283 ->293         | -0.17420  |           |           |          |  |
| Excited State 33: | Singlet-A | 3.0079 eV | 412.20 nm | f=0.0041 |  |
| 275 ->288         | -0.19871  |           |           |          |  |
| 275 ->289         | -0.12052  |           |           |          |  |
| 276 ->289         | 0.26577   |           |           |          |  |
| 276 ->290         | -0.10864  |           |           |          |  |
| 276 ->293         | -0.10933  |           |           |          |  |
| 277 ->287         | 0.13479   |           |           |          |  |
| 277 ->288         | -0.17873  |           |           |          |  |
| 277 ->289         | -0.25696  |           |           |          |  |
| 277 ->293         | 0.13600   |           |           |          |  |
| 282 ->288         | -0.15771  |           |           |          |  |
| Excited State 34: | Singlet-A | 3.0265 eV | 409.66 nm | f=0.0042 |  |
| 275 ->292         | -0.12963  |           |           |          |  |
| 277 ->292         | 0.16925   |           |           |          |  |
| 281 ->289         | 0.11640   |           |           |          |  |
| 281 ->290         | -0.17276  |           |           |          |  |
| 281 ->291         | 0.16748   |           |           |          |  |
| 281 ->292         | 0.27520   |           |           |          |  |
| 281 ->293         | 0.14423   |           |           |          |  |
| 282 ->290         | -0.13818  |           |           |          |  |
| 282 ->291         | 0.11235   |           |           |          |  |
| 282 ->292         | 0.15028   |           |           |          |  |

|                   |           |           |           |          |  |
|-------------------|-----------|-----------|-----------|----------|--|
| 284 ->288         | 0.11013   |           |           |          |  |
| Excited State 35: | Singlet-A | 3.0386 eV | 408.03 nm | f=0.0078 |  |
| 275 ->286         | -0.10018  |           |           |          |  |
| 277 ->289         | 0.17255   |           |           |          |  |
| 282 ->288         | -0.23156  |           |           |          |  |
| 283 ->286         | 0.24776   |           |           |          |  |
| 283 ->288         | 0.33382   |           |           |          |  |
| 285 ->286         | 0.17452   |           |           |          |  |
| 285 ->287         | 0.13806   |           |           |          |  |
| Excited State 36: | Singlet-A | 3.0467 eV | 406.94 nm | f=0.0091 |  |
| 275 ->293         | 0.11018   |           |           |          |  |
| 276 ->292         | -0.10079  |           |           |          |  |
| 276 ->293         | 0.12818   |           |           |          |  |
| 281 ->289         | 0.23020   |           |           |          |  |
| 281 ->291         | -0.15733  |           |           |          |  |
| 281 ->292         | -0.14684  |           |           |          |  |
| 281 ->293         | 0.28174   |           |           |          |  |
| 282 ->286         | 0.10861   |           |           |          |  |
| 282 ->288         | 0.10542   |           |           |          |  |
| 282 ->289         | -0.14654  |           |           |          |  |
| 282 ->296         | -0.13014  |           |           |          |  |
| 285 ->293         | -0.11775  |           |           |          |  |
| 285 ->294         | -0.14774  |           |           |          |  |
| Excited State 37: | Singlet-A | 3.0527 eV | 406.14 nm | f=0.0237 |  |
| 277 ->287         | -0.10145  |           |           |          |  |
| 281 ->294         | -0.18004  |           |           |          |  |
| 282 ->286         | -0.12602  |           |           |          |  |
| 282 ->294         | 0.35125   |           |           |          |  |
| 283 ->286         | -0.11288  |           |           |          |  |
| 283 ->294         | 0.17205   |           |           |          |  |
| 283 ->296         | 0.23694   |           |           |          |  |
| 285 ->286         | -0.10805  |           |           |          |  |
| 285 ->296         | 0.15905   |           |           |          |  |
| Excited State 38: | Singlet-A | 3.0572 eV | 405.55 nm | f=0.0336 |  |
| 271 ->289         | 0.10484   |           |           |          |  |
| 276 ->286         | -0.11655  |           |           |          |  |
| 276 ->290         | 0.13657   |           |           |          |  |
| 277 ->290         | -0.15895  |           |           |          |  |
| 277 ->291         | 0.18294   |           |           |          |  |
| 277 ->292         | -0.15386  |           |           |          |  |

|                   |           |           |           |          |
|-------------------|-----------|-----------|-----------|----------|
| 281 ->293         | 0.12607   |           |           |          |
| 282 ->286         | -0.16716  |           |           |          |
| 282 ->288         | -0.15223  |           |           |          |
| 282 ->290         | 0.13276   |           |           |          |
| 282 ->292         | 0.10129   |           |           |          |
| 282 ->294         | -0.13234  |           |           |          |
| 283 ->286         | -0.14735  |           |           |          |
| 283 ->294         | -0.11955  |           |           |          |
| 283 ->296         | -0.13402  |           |           |          |
| 285 ->288         | -0.12785  |           |           |          |
| Excited State 39: | Singlet-A | 3.0609 eV | 405.06 nm | f=0.0186 |
| 276 ->291         | -0.15200  |           |           |          |
| 277 ->286         | 0.15956   |           |           |          |
| 277 ->289         | -0.12342  |           |           |          |
| 277 ->290         | -0.11935  |           |           |          |
| 277 ->292         | -0.10197  |           |           |          |
| 278 ->289         | 0.12347   |           |           |          |
| 282 ->288         | 0.24628   |           |           |          |
| 283 ->286         | 0.23726   |           |           |          |
| 284 ->288         | -0.12687  |           |           |          |
| 285 ->286         | 0.14095   |           |           |          |
| 285 ->287         | 0.19395   |           |           |          |
| 285 ->288         | 0.11301   |           |           |          |
| Excited State 40: | Singlet-A | 3.0662 eV | 404.36 nm | f=0.0013 |
| 275 ->287         | -0.13101  |           |           |          |
| 277 ->287         | 0.11126   |           |           |          |
| 277 ->290         | -0.11813  |           |           |          |
| 281 ->288         | 0.19494   |           |           |          |
| 282 ->287         | -0.12440  |           |           |          |
| 282 ->288         | -0.16757  |           |           |          |
| 283 ->287         | 0.11440   |           |           |          |
| 284 ->287         | 0.18908   |           |           |          |
| 284 ->288         | -0.12064  |           |           |          |
| 284 ->295         | 0.15891   |           |           |          |
| 284 ->297         | 0.16761   |           |           |          |
| 285 ->286         | 0.19051   |           |           |          |
| 285 ->287         | -0.13291  |           |           |          |
| 285 ->288         | 0.14168   |           |           |          |
| Excited State 41: | Singlet-A | 3.0712 eV | 403.70 nm | f=0.0203 |
| 275 ->286         | -0.15274  |           |           |          |
| 277 ->290         | 0.14575   |           |           |          |



|                   |           |           |           |          |  |
|-------------------|-----------|-----------|-----------|----------|--|
| 282 ->286         | -0.16581  |           |           |          |  |
| 283 ->286         | -0.10061  |           |           |          |  |
| 284 ->295         | 0.26077   |           |           |          |  |
| 284 ->297         | 0.27706   |           |           |          |  |
| 285 ->287         | 0.11038   |           |           |          |  |
| 285 ->295         | -0.10912  |           |           |          |  |
| Excited State 42: | Singlet-A | 3.0734 eV | 403.42 nm | f=0.0093 |  |
| 278 ->291         | -0.10235  |           |           |          |  |
| 282 ->288         | 0.11614   |           |           |          |  |
| 284 ->286         | -0.18209  |           |           |          |  |
| 284 ->287         | 0.43996   |           |           |          |  |
| 284 ->288         | 0.27445   |           |           |          |  |
| 284 ->289         | 0.12919   |           |           |          |  |
| 284 ->290         | 0.13888   |           |           |          |  |
| 285 ->288         | -0.12505  |           |           |          |  |
| Excited State 43: | Singlet-A | 3.0793 eV | 402.64 nm | f=0.0420 |  |
| 275 ->286         | -0.11826  |           |           |          |  |
| 280 ->295         | -0.11776  |           |           |          |  |
| 281 ->286         | 0.10233   |           |           |          |  |
| 281 ->295         | 0.11415   |           |           |          |  |
| 282 ->286         | -0.14694  |           |           |          |  |
| 282 ->295         | 0.17702   |           |           |          |  |
| 282 ->296         | -0.13553  |           |           |          |  |
| 282 ->297         | -0.10100  |           |           |          |  |
| 283 ->295         | -0.18974  |           |           |          |  |
| 284 ->288         | -0.11393  |           |           |          |  |
| 285 ->286         | 0.10483   |           |           |          |  |
| 285 ->287         | 0.11185   |           |           |          |  |
| 285 ->295         | 0.19483   |           |           |          |  |
| Excited State 44: | Singlet-A | 3.0814 eV | 402.37 nm | f=0.0060 |  |
| 281 ->289         | 0.11300   |           |           |          |  |
| 281 ->293         | 0.12737   |           |           |          |  |
| 281 ->296         | -0.17381  |           |           |          |  |
| 282 ->295         | 0.10962   |           |           |          |  |
| 282 ->296         | 0.30177   |           |           |          |  |
| 283 ->294         | 0.17198   |           |           |          |  |
| 283 ->295         | -0.11767  |           |           |          |  |
| 283 ->296         | 0.10923   |           |           |          |  |
| 285 ->288         | -0.10576  |           |           |          |  |
| 285 ->294         | 0.19684   |           |           |          |  |
| 285 ->295         | 0.11923   |           |           |          |  |

|                   |           |           |           |          |
|-------------------|-----------|-----------|-----------|----------|
| Excited State 45: | Singlet-A | 3.0835 eV | 402.09 nm | f=0.0220 |
| 281 ->288         | -0.12370  |           |           |          |
| 281 ->291         | 0.10235   |           |           |          |
| 282 ->286         | 0.12604   |           |           |          |
| 282 ->289         | 0.10202   |           |           |          |
| 282 ->295         | 0.11644   |           |           |          |
| 282 ->297         | -0.13582  |           |           |          |
| 283 ->288         | 0.16012   |           |           |          |
| 283 ->295         | -0.13000  |           |           |          |
| 283 ->297         | 0.13450   |           |           |          |
| 284 ->295         | 0.23172   |           |           |          |
| 284 ->297         | 0.23236   |           |           |          |
| 285 ->286         | -0.16217  |           |           |          |
| 285 ->297         | -0.16367  |           |           |          |

|                   |           |           |           |          |
|-------------------|-----------|-----------|-----------|----------|
| Excited State 46: | Singlet-A | 3.0863 eV | 401.72 nm | f=0.0015 |
| 272 ->286         | 0.10711   |           |           |          |
| 275 ->287         | -0.12353  |           |           |          |
| 276 ->287         | -0.13671  |           |           |          |
| 277 ->287         | 0.25551   |           |           |          |
| 281 ->288         | -0.17033  |           |           |          |
| 282 ->288         | 0.15292   |           |           |          |
| 282 ->294         | 0.10432   |           |           |          |
| 283 ->287         | 0.10559   |           |           |          |
| 284 ->286         | 0.11125   |           |           |          |
| 284 ->287         | -0.16221  |           |           |          |
| 285 ->286         | 0.17302   |           |           |          |
| 285 ->287         | -0.16476  |           |           |          |
| 285 ->288         | -0.18369  |           |           |          |

|                   |           |           |           |          |
|-------------------|-----------|-----------|-----------|----------|
| Excited State 47: | Singlet-A | 3.0970 eV | 400.34 nm | f=0.0031 |
| 281 ->288         | 0.21085   |           |           |          |
| 282 ->288         | 0.10240   |           |           |          |
| 283 ->288         | -0.15871  |           |           |          |
| 284 ->286         | 0.17149   |           |           |          |
| 284 ->287         | -0.19073  |           |           |          |
| 284 ->288         | 0.41104   |           |           |          |
| 285 ->288         | 0.11724   |           |           |          |

|                   |           |           |           |          |
|-------------------|-----------|-----------|-----------|----------|
| Excited State 48: | Singlet-A | 3.1022 eV | 399.67 nm | f=0.0082 |
| 282 ->286         | -0.10321  |           |           |          |
| 282 ->288         | 0.22010   |           |           |          |
| 283 ->286         | -0.24887  |           |           |          |

|                   |           |           |           |          |
|-------------------|-----------|-----------|-----------|----------|
| 283 ->288         | 0.36724   |           |           |          |
| 283 ->289         | 0.13008   |           |           |          |
| 285 ->288         | 0.19900   |           |           |          |
| Excited State 49: | Singlet-A | 3.1183 eV | 397.61 nm | f=0.0006 |
| 275 ->289         | -0.15137  |           |           |          |
| 276 ->292         | 0.13082   |           |           |          |
| 278 ->293         | -0.20415  |           |           |          |
| 281 ->286         | -0.19416  |           |           |          |
| 281 ->290         | 0.12398   |           |           |          |
| 282 ->287         | 0.18241   |           |           |          |
| 282 ->289         | -0.10959  |           |           |          |
| 282 ->293         | 0.10962   |           |           |          |
| 283 ->287         | -0.17716  |           |           |          |
| 283 ->289         | 0.21510   |           |           |          |
| 283 ->290         | -0.13395  |           |           |          |
| Excited State 50: | Singlet-A | 3.1220 eV | 397.13 nm | f=0.0038 |
| 276 ->287         | 0.12878   |           |           |          |
| 276 ->293         | -0.15778  |           |           |          |
| 278 ->289         | -0.11553  |           |           |          |
| 278 ->292         | 0.17574   |           |           |          |
| 278 ->293         | -0.13598  |           |           |          |
| 281 ->286         | 0.11712   |           |           |          |
| 281 ->289         | 0.11075   |           |           |          |
| 281 ->293         | 0.17961   |           |           |          |
| 282 ->289         | 0.18374   |           |           |          |
| 282 ->290         | 0.10924   |           |           |          |
| 283 ->286         | 0.10118   |           |           |          |
| 283 ->289         | 0.14895   |           |           |          |
| 283 ->290         | 0.11460   |           |           |          |
| 283 ->291         | -0.12893  |           |           |          |
| 285 ->293         | -0.10423  |           |           |          |
| Excited State 51: | Singlet-A | 3.1253 eV | 396.71 nm | f=0.0007 |
| 272 ->287         | -0.11637  |           |           |          |
| 274 ->287         | -0.10188  |           |           |          |
| 277 ->286         | -0.13888  |           |           |          |
| 277 ->287         | 0.19847   |           |           |          |
| 281 ->287         | 0.16002   |           |           |          |
| 281 ->288         | 0.13200   |           |           |          |
| 282 ->286         | -0.18829  |           |           |          |
| 282 ->290         | 0.13939   |           |           |          |
| 282 ->291         | 0.13734   |           |           |          |

|                   |           |           |           |          |  |
|-------------------|-----------|-----------|-----------|----------|--|
| 283 ->287         | -0.15369  |           |           |          |  |
| 283 ->289         | -0.12007  |           |           |          |  |
| 283 ->290         | -0.19064  |           |           |          |  |
| 284 ->290         | -0.15452  |           |           |          |  |
| 285 ->288         | 0.18917   |           |           |          |  |
| Excited State 52: | Singlet-A | 3.1296 eV | 396.16 nm | f=0.0011 |  |
| 280 ->289         | 0.21406   |           |           |          |  |
| 280 ->290         | -0.35326  |           |           |          |  |
| 280 ->291         | 0.25090   |           |           |          |  |
| 280 ->292         | 0.38352   |           |           |          |  |
| 280 ->293         | 0.21117   |           |           |          |  |
| Excited State 53: | Singlet-A | 3.1307 eV | 396.03 nm | f=0.0013 |  |
| 276 ->288         | 0.10997   |           |           |          |  |
| 278 ->290         | -0.13467  |           |           |          |  |
| 278 ->291         | 0.11632   |           |           |          |  |
| 283 ->289         | 0.13715   |           |           |          |  |
| 283 ->290         | -0.12028  |           |           |          |  |
| 284 ->287         | -0.13564  |           |           |          |  |
| 284 ->289         | 0.40010   |           |           |          |  |
| 284 ->290         | 0.16100   |           |           |          |  |
| 285 ->289         | -0.11735  |           |           |          |  |
| 285 ->290         | -0.11304  |           |           |          |  |
| Excited State 54: | Singlet-A | 3.1342 eV | 395.59 nm | f=0.0048 |  |
| 276 ->286         | 0.11117   |           |           |          |  |
| 276 ->292         | 0.10635   |           |           |          |  |
| 277 ->286         | -0.19894  |           |           |          |  |
| 278 ->288         | -0.12588  |           |           |          |  |
| 278 ->290         | 0.10228   |           |           |          |  |
| 278 ->292         | -0.18863  |           |           |          |  |
| 281 ->289         | -0.11128  |           |           |          |  |
| 281 ->292         | -0.10537  |           |           |          |  |
| 282 ->290         | 0.22255   |           |           |          |  |
| 283 ->290         | 0.10423   |           |           |          |  |
| 284 ->287         | -0.13547  |           |           |          |  |
| 284 ->290         | 0.22980   |           |           |          |  |
| 285 ->293         | 0.10351   |           |           |          |  |
| Excited State 55: | Singlet-A | 3.1393 eV | 394.94 nm | f=0.0006 |  |
| 277 ->287         | 0.12210   |           |           |          |  |
| 277 ->288         | -0.10460  |           |           |          |  |
| 278 ->288         | -0.10655  |           |           |          |  |

|                   |           |           |           |          |  |
|-------------------|-----------|-----------|-----------|----------|--|
| 281 ->292         | 0.11780   |           |           |          |  |
| 282 ->287         | 0.13831   |           |           |          |  |
| 282 ->292         | 0.10455   |           |           |          |  |
| 283 ->286         | 0.10400   |           |           |          |  |
| 283 ->290         | 0.35668   |           |           |          |  |
| 285 ->287         | 0.11253   |           |           |          |  |
| 285 ->290         | 0.28321   |           |           |          |  |
| Excited State 56: | Singlet-A | 3.1469 eV | 393.99 nm | f=0.0035 |  |
| 279 ->289         | 0.18651   |           |           |          |  |
| 279 ->293         | 0.17977   |           |           |          |  |
| 281 ->286         | -0.13665  |           |           |          |  |
| 281 ->289         | 0.10239   |           |           |          |  |
| 282 ->287         | 0.11762   |           |           |          |  |
| 282 ->289         | 0.11640   |           |           |          |  |
| 283 ->289         | -0.24188  |           |           |          |  |
| 283 ->293         | 0.10737   |           |           |          |  |
| 284 ->287         | -0.11164  |           |           |          |  |
| 284 ->289         | 0.11584   |           |           |          |  |
| 284 ->290         | 0.28644   |           |           |          |  |
| 284 ->292         | 0.14384   |           |           |          |  |
| Excited State 57: | Singlet-A | 3.1481 eV | 393.84 nm | f=0.0024 |  |
| 279 ->289         | 0.38181   |           |           |          |  |
| 279 ->291         | -0.18809  |           |           |          |  |
| 279 ->292         | -0.20032  |           |           |          |  |
| 279 ->293         | 0.36453   |           |           |          |  |
| 283 ->289         | 0.11893   |           |           |          |  |
| 284 ->290         | -0.14454  |           |           |          |  |
| Excited State 58: | Singlet-A | 3.1604 eV | 392.30 nm | f=0.0028 |  |
| 271 ->286         | 0.13765   |           |           |          |  |
| 274 ->286         | -0.14098  |           |           |          |  |
| 275 ->286         | 0.23162   |           |           |          |  |
| 275 ->287         | 0.14658   |           |           |          |  |
| 276 ->286         | -0.11117  |           |           |          |  |
| 276 ->287         | -0.10337  |           |           |          |  |
| 277 ->286         | 0.18258   |           |           |          |  |
| 277 ->287         | 0.16918   |           |           |          |  |
| 278 ->286         | -0.10568  |           |           |          |  |
| 281 ->288         | -0.11947  |           |           |          |  |
| 282 ->286         | -0.10933  |           |           |          |  |
| 282 ->289         | -0.15812  |           |           |          |  |
| 283 ->290         | 0.11458   |           |           |          |  |

|                   |           |           |           |          |  |
|-------------------|-----------|-----------|-----------|----------|--|
| 284 ->289         | -0.15294  |           |           |          |  |
| Excited State 59: | Singlet-A | 3.1682 eV | 391.34 nm | f=0.0009 |  |
| 281 ->287         | -0.15867  |           |           |          |  |
| 281 ->289         | 0.19195   |           |           |          |  |
| 281 ->293         | -0.19899  |           |           |          |  |
| 282 ->289         | -0.14979  |           |           |          |  |
| 282 ->290         | 0.22568   |           |           |          |  |
| 282 ->291         | 0.12266   |           |           |          |  |
| 282 ->293         | 0.19028   |           |           |          |  |
| 285 ->289         | 0.25151   |           |           |          |  |
| 285 ->293         | -0.11100  |           |           |          |  |
| Excited State 60: | Singlet-A | 3.1696 eV | 391.16 nm | f=0.0005 |  |
| 277 ->289         | 0.10306   |           |           |          |  |
| 278 ->291         | 0.10197   |           |           |          |  |
| 282 ->289         | 0.25157   |           |           |          |  |
| 282 ->293         | -0.13890  |           |           |          |  |
| 283 ->286         | 0.11595   |           |           |          |  |
| 283 ->289         | 0.20204   |           |           |          |  |
| 283 ->291         | 0.28169   |           |           |          |  |
| 283 ->293         | -0.12912  |           |           |          |  |
| 285 ->289         | 0.27716   |           |           |          |  |
| 285 ->291         | 0.10844   |           |           |          |  |
| Excited State 61: | Singlet-A | 3.1758 eV | 390.40 nm | f=0.0021 |  |
| 271 ->286         | -0.10487  |           |           |          |  |
| 275 ->286         | -0.11066  |           |           |          |  |
| 276 ->286         | 0.11251   |           |           |          |  |
| 277 ->286         | -0.16581  |           |           |          |  |
| 281 ->287         | 0.11183   |           |           |          |  |
| 281 ->290         | -0.14091  |           |           |          |  |
| 282 ->289         | -0.13504  |           |           |          |  |
| 282 ->290         | -0.15499  |           |           |          |  |
| 283 ->287         | -0.12914  |           |           |          |  |
| 283 ->289         | 0.13089   |           |           |          |  |
| 284 ->289         | -0.20240  |           |           |          |  |
| 284 ->290         | 0.10480   |           |           |          |  |
| 284 ->291         | 0.20935   |           |           |          |  |
| 285 ->290         | -0.12997  |           |           |          |  |
| 285 ->292         | -0.10549  |           |           |          |  |
| Excited State 62: | Singlet-A | 3.1777 eV | 390.17 nm | f=0.0101 |  |
| 271 ->287         | -0.10865  |           |           |          |  |

|           |          |
|-----------|----------|
| 272 ->287 | 0.18714  |
| 275 ->286 | -0.12293 |
| 275 ->287 | 0.26458  |
| 276 ->287 | -0.13631 |
| 277 ->287 | 0.24443  |
| 277 ->290 | -0.12440 |
| 278 ->287 | -0.11545 |
| 282 ->286 | 0.11384  |
| 284 ->291 | -0.14614 |
| 285 ->290 | -0.15913 |

Excited State 63: Singlet-A 3.1838 eV 389.42 nm f=0.0046

|           |          |
|-----------|----------|
| 272 ->287 | 0.10813  |
| 275 ->287 | 0.12226  |
| 282 ->290 | 0.11218  |
| 282 ->292 | 0.12731  |
| 283 ->290 | -0.10326 |
| 284 ->289 | -0.12632 |
| 284 ->290 | 0.11268  |
| 284 ->291 | 0.39098  |
| 284 ->292 | -0.15742 |
| 285 ->291 | -0.13201 |

Excited State 64: Singlet-A 3.1876 eV 388.96 nm f=0.0014

|           |          |
|-----------|----------|
| 275 ->287 | -0.10309 |
| 275 ->290 | 0.12103  |
| 277 ->286 | 0.16666  |
| 277 ->290 | 0.11149  |
| 281 ->286 | -0.13099 |
| 281 ->290 | -0.21162 |
| 282 ->286 | 0.13684  |
| 282 ->287 | 0.15148  |
| 282 ->288 | -0.10670 |
| 282 ->290 | 0.22337  |
| 282 ->292 | 0.17334  |
| 284 ->289 | -0.10271 |
| 285 ->290 | -0.14923 |

Excited State 65: Singlet-A 3.1931 eV 388.29 nm f=0.0847

|           |          |
|-----------|----------|
| 272 ->289 | -0.11007 |
| 272 ->293 | -0.13316 |
| 273 ->293 | 0.10450  |
| 274 ->289 | 0.26963  |
| 274 ->291 | -0.14849 |

|                   |           |           |           |          |  |
|-------------------|-----------|-----------|-----------|----------|--|
| 274 ->292         | -0.14681  |           |           |          |  |
| 274 ->293         | 0.26385   |           |           |          |  |
| 277 ->293         | 0.12706   |           |           |          |  |
| Excited State 66: | Singlet-A | 3.2062 eV | 386.70 nm | f=0.0185 |  |
| 273 ->290         | -0.10184  |           |           |          |  |
| 273 ->292         | 0.17072   |           |           |          |  |
| 275 ->291         | 0.13814   |           |           |          |  |
| 281 ->289         | -0.15519  |           |           |          |  |
| 281 ->290         | 0.14978   |           |           |          |  |
| 282 ->291         | 0.28021   |           |           |          |  |
| 283 ->289         | 0.12222   |           |           |          |  |
| 283 ->290         | -0.10880  |           |           |          |  |
| 284 ->289         | -0.12493  |           |           |          |  |
| 284 ->290         | 0.15192   |           |           |          |  |
| 284 ->292         | 0.13378   |           |           |          |  |
| 285 ->289         | -0.16757  |           |           |          |  |
| 285 ->290         | 0.15545   |           |           |          |  |
| Excited State 67: | Singlet-A | 3.2077 eV | 386.52 nm | f=0.0185 |  |
| 272 ->290         | -0.12243  |           |           |          |  |
| 272 ->292         | 0.12749   |           |           |          |  |
| 272 ->293         | 0.12215   |           |           |          |  |
| 273 ->289         | 0.10891   |           |           |          |  |
| 273 ->290         | -0.20553  |           |           |          |  |
| 273 ->291         | 0.17599   |           |           |          |  |
| 273 ->292         | 0.23327   |           |           |          |  |
| 273 ->293         | 0.11265   |           |           |          |  |
| 275 ->291         | -0.11208  |           |           |          |  |
| 282 ->291         | -0.24908  |           |           |          |  |
| 285 ->289         | 0.10990   |           |           |          |  |
| Excited State 68: | Singlet-A | 3.2136 eV | 385.81 nm | f=0.0018 |  |
| 275 ->293         | -0.10424  |           |           |          |  |
| 276 ->286         | -0.13019  |           |           |          |  |
| 276 ->288         | -0.12734  |           |           |          |  |
| 277 ->288         | -0.11723  |           |           |          |  |
| 278 ->286         | -0.15884  |           |           |          |  |
| 278 ->288         | -0.10386  |           |           |          |  |
| 278 ->293         | -0.11102  |           |           |          |  |
| 281 ->290         | -0.11234  |           |           |          |  |
| 283 ->289         | -0.13692  |           |           |          |  |
| 283 ->291         | 0.19518   |           |           |          |  |
| 283 ->292         | -0.19174  |           |           |          |  |



|                   |           |           |           |          |  |
|-------------------|-----------|-----------|-----------|----------|--|
| 283 ->293         | 0.17585   |           |           |          |  |
| 285 ->289         | -0.11842  |           |           |          |  |
| 285 ->290         | -0.11098  |           |           |          |  |
| Excited State 69: | Singlet-A | 3.2181 eV | 385.27 nm | f=0.0150 |  |
| 272 ->292         | -0.10259  |           |           |          |  |
| 275 ->292         | 0.12631   |           |           |          |  |
| 281 ->291         | 0.11167   |           |           |          |  |
| 282 ->291         | -0.17341  |           |           |          |  |
| 282 ->292         | 0.20904   |           |           |          |  |
| 283 ->290         | -0.13312  |           |           |          |  |
| 283 ->292         | -0.12022  |           |           |          |  |
| 284 ->290         | 0.12355   |           |           |          |  |
| 284 ->291         | -0.16235  |           |           |          |  |
| 284 ->292         | 0.23253   |           |           |          |  |
| Excited State 70: | Singlet-A | 3.2246 eV | 384.49 nm | f=0.0059 |  |
| 270 ->286         | -0.11056  |           |           |          |  |
| 271 ->286         | 0.20504   |           |           |          |  |
| 275 ->288         | -0.13645  |           |           |          |  |
| 281 ->291         | 0.23687   |           |           |          |  |
| 281 ->292         | -0.11464  |           |           |          |  |
| 282 ->288         | 0.13019   |           |           |          |  |
| 284 ->291         | 0.14168   |           |           |          |  |
| 285 ->291         | 0.31647   |           |           |          |  |
| 285 ->292         | -0.13894  |           |           |          |  |
| Excited State 71: | Singlet-A | 3.2318 eV | 383.64 nm | f=0.0128 |  |
| 270 ->286         | -0.17029  |           |           |          |  |
| 271 ->286         | 0.17574   |           |           |          |  |
| 275 ->288         | -0.10156  |           |           |          |  |
| 275 ->289         | 0.11389   |           |           |          |  |
| 278 ->286         | 0.12601   |           |           |          |  |
| 281 ->291         | -0.19923  |           |           |          |  |
| 281 ->292         | 0.11658   |           |           |          |  |
| 283 ->291         | 0.25202   |           |           |          |  |
| 283 ->292         | -0.13143  |           |           |          |  |
| 284 ->291         | -0.11701  |           |           |          |  |
| 285 ->291         | -0.22959  |           |           |          |  |
| Excited State 72: | Singlet-A | 3.2385 eV | 382.84 nm | f=0.0033 |  |
| 270 ->287         | 0.16789   |           |           |          |  |
| 271 ->286         | -0.16156  |           |           |          |  |
| 275 ->286         | 0.10219   |           |           |          |  |

|                   |           |           |           |          |
|-------------------|-----------|-----------|-----------|----------|
| 275 ->288         | 0.19861   |           |           |          |
| 276 ->286         | 0.17290   |           |           |          |
| 276 ->290         | -0.10785  |           |           |          |
| 277 ->286         | 0.15465   |           |           |          |
| 277 ->287         | 0.10059   |           |           |          |
| 278 ->286         | 0.22452   |           |           |          |
| 278 ->288         | 0.13156   |           |           |          |
| 278 ->290         | -0.11232  |           |           |          |
| 279 ->286         | 0.10651   |           |           |          |
| 279 ->288         | 0.10357   |           |           |          |
| 282 ->288         | -0.12779  |           |           |          |
| 285 ->291         | 0.15790   |           |           |          |
| Excited State 73: | Singlet-A | 3.2472 eV | 381.82 nm | f=0.0008 |
| 272 ->290         | -0.11034  |           |           |          |
| 274 ->290         | -0.10288  |           |           |          |
| 275 ->288         | -0.15864  |           |           |          |
| 276 ->286         | 0.10604   |           |           |          |
| 276 ->287         | -0.15678  |           |           |          |
| 276 ->288         | -0.12430  |           |           |          |
| 276 ->289         | -0.12480  |           |           |          |
| 276 ->291         | -0.10464  |           |           |          |
| 276 ->292         | -0.10173  |           |           |          |
| 277 ->290         | -0.10982  |           |           |          |
| 278 ->287         | 0.16101   |           |           |          |
| 278 ->288         | 0.19882   |           |           |          |
| 278 ->289         | 0.12925   |           |           |          |
| 280 ->288         | 0.10221   |           |           |          |
| 284 ->291         | 0.11434   |           |           |          |
| 285 ->292         | 0.15978   |           |           |          |
| Excited State 74: | Singlet-A | 3.2503 eV | 381.46 nm | f=0.0070 |
| 279 ->286         | 0.41665   |           |           |          |
| 279 ->287         | 0.20162   |           |           |          |
| 279 ->288         | 0.35283   |           |           |          |
| 279 ->296         | 0.26831   |           |           |          |
| Excited State 75: | Singlet-A | 3.2508 eV | 381.39 nm | f=0.0006 |
| 280 ->286         | 0.17150   |           |           |          |
| 280 ->288         | 0.63501   |           |           |          |
| Excited State 76: | Singlet-A | 3.2538 eV | 381.04 nm | f=0.0028 |
| 270 ->287         | 0.15134   |           |           |          |
| 276 ->287         | 0.16153   |           |           |          |

|                   |           |           |           |          |  |
|-------------------|-----------|-----------|-----------|----------|--|
| 276 ->290         | 0.13874   |           |           |          |  |
| 276 ->292         | -0.10159  |           |           |          |  |
| 278 ->287         | -0.19036  |           |           |          |  |
| 278 ->289         | -0.11533  |           |           |          |  |
| 278 ->290         | -0.11803  |           |           |          |  |
| 280 ->288         | 0.16724   |           |           |          |  |
| 284 ->292         | 0.19021   |           |           |          |  |
| 285 ->292         | 0.16652   |           |           |          |  |
| Excited State 77: | Singlet-A | 3.2569 eV | 380.68 nm | f=0.0356 |  |
| 279 ->286         | -0.15179  |           |           |          |  |
| 279 ->288         | -0.24611  |           |           |          |  |
| 279 ->289         | -0.13309  |           |           |          |  |
| 279 ->296         | 0.50414   |           |           |          |  |
| Excited State 78: | Singlet-A | 3.2623 eV | 380.05 nm | f=0.0060 |  |
| 269 ->287         | -0.10357  |           |           |          |  |
| 270 ->286         | -0.13209  |           |           |          |  |
| 270 ->287         | 0.26447   |           |           |          |  |
| 271 ->287         | 0.14232   |           |           |          |  |
| 271 ->288         | 0.10355   |           |           |          |  |
| 272 ->288         | 0.10515   |           |           |          |  |
| 275 ->287         | 0.10030   |           |           |          |  |
| 275 ->288         | 0.17584   |           |           |          |  |
| 275 ->290         | 0.13455   |           |           |          |  |
| 275 ->291         | 0.10579   |           |           |          |  |
| 276 ->287         | -0.16600  |           |           |          |  |
| 278 ->286         | -0.12742  |           |           |          |  |
| 282 ->290         | -0.11074  |           |           |          |  |
| 282 ->291         | -0.11624  |           |           |          |  |
| Excited State 79: | Singlet-A | 3.2653 eV | 379.71 nm | f=0.0035 |  |
| 270 ->287         | -0.12910  |           |           |          |  |
| 275 ->288         | 0.15057   |           |           |          |  |
| 275 ->289         | 0.11987   |           |           |          |  |
| 275 ->290         | 0.11217   |           |           |          |  |
| 277 ->289         | -0.12640  |           |           |          |  |
| 277 ->292         | 0.10548   |           |           |          |  |
| 277 ->293         | -0.10779  |           |           |          |  |
| 278 ->287         | 0.10993   |           |           |          |  |
| 279 ->296         | 0.17505   |           |           |          |  |
| 280 ->287         | 0.21514   |           |           |          |  |
| 280 ->297         | 0.18462   |           |           |          |  |
| 285 ->293         | 0.22209   |           |           |          |  |

|                   |           |           |           |          |
|-------------------|-----------|-----------|-----------|----------|
| Excited State 80: | Singlet-A | 3.2667 eV | 379.54 nm | f=0.0057 |
| 280 ->286         | -0.23292  |           |           |          |
| 280 ->287         | 0.50971   |           |           |          |
| 280 ->297         | 0.20790   |           |           |          |
| 285 ->293         | -0.11735  |           |           |          |
| Excited State 81: | Singlet-A | 3.2727 eV | 378.84 nm | f=0.0326 |
| 280 ->286         | 0.12711   |           |           |          |
| 280 ->287         | -0.26150  |           |           |          |
| 280 ->297         | 0.54082   |           |           |          |
| 284 ->311         | -0.10361  |           |           |          |
| Excited State 82: | Singlet-A | 3.2768 eV | 378.37 nm | f=0.0009 |
| 279 ->286         | -0.39773  |           |           |          |
| 279 ->287         | -0.13495  |           |           |          |
| 279 ->288         | 0.50338   |           |           |          |
| 279 ->290         | 0.15585   |           |           |          |
| 279 ->291         | 0.10061   |           |           |          |
| Excited State 83: | Singlet-A | 3.2809 eV | 377.90 nm | f=0.0038 |
| 269 ->286         | -0.12580  |           |           |          |
| 270 ->287         | -0.17385  |           |           |          |
| 271 ->286         | 0.10234   |           |           |          |
| 271 ->288         | -0.14188  |           |           |          |
| 275 ->288         | 0.17164   |           |           |          |
| 275 ->289         | -0.17691  |           |           |          |
| 277 ->293         | 0.16551   |           |           |          |
| 278 ->287         | 0.13232   |           |           |          |
| 278 ->288         | -0.11562  |           |           |          |
| 278 ->293         | 0.13215   |           |           |          |
| 281 ->286         | -0.10031  |           |           |          |
| 285 ->292         | 0.19373   |           |           |          |
| 285 ->293         | -0.11231  |           |           |          |
| Excited State 84: | Singlet-A | 3.2951 eV | 376.27 nm | f=0.0000 |
| 276 ->287         | 0.11440   |           |           |          |
| 278 ->286         | 0.10173   |           |           |          |
| 278 ->290         | 0.14553   |           |           |          |
| 278 ->292         | 0.13204   |           |           |          |
| 282 ->292         | 0.12242   |           |           |          |
| 283 ->290         | -0.19062  |           |           |          |
| 283 ->291         | 0.20299   |           |           |          |
| 283 ->292         | 0.30675   |           |           |          |

|                   |           |           |           |          |  |
|-------------------|-----------|-----------|-----------|----------|--|
| 283 ->293         | 0.20971   |           |           |          |  |
| 285 ->291         | 0.11120   |           |           |          |  |
| 285 ->292         | 0.18181   |           |           |          |  |
| 285 ->293         | 0.15121   |           |           |          |  |
| Excited State 85: | Singlet-A | 3.2992 eV | 375.80 nm | f=0.0022 |  |
| 270 ->286         | -0.13367  |           |           |          |  |
| 270 ->290         | -0.12478  |           |           |          |  |
| 271 ->288         | -0.17121  |           |           |          |  |
| 272 ->288         | -0.12103  |           |           |          |  |
| 276 ->286         | -0.11060  |           |           |          |  |
| 276 ->287         | 0.13086   |           |           |          |  |
| 276 ->288         | -0.12643  |           |           |          |  |
| 276 ->289         | -0.10099  |           |           |          |  |
| 276 ->292         | -0.10801  |           |           |          |  |
| 277 ->289         | -0.11801  |           |           |          |  |
| 277 ->290         | -0.10373  |           |           |          |  |
| 278 ->287         | -0.16986  |           |           |          |  |
| 278 ->289         | 0.10275   |           |           |          |  |
| 278 ->290         | 0.19865   |           |           |          |  |
| 283 ->292         | -0.11539  |           |           |          |  |
| 283 ->293         | -0.10863  |           |           |          |  |
| Excited State 86: | Singlet-A | 3.3008 eV | 375.62 nm | f=0.0007 |  |
| 275 ->289         | 0.14191   |           |           |          |  |
| 276 ->287         | 0.16321   |           |           |          |  |
| 277 ->293         | 0.11956   |           |           |          |  |
| 283 ->292         | -0.15073  |           |           |          |  |
| 284 ->289         | 0.14594   |           |           |          |  |
| 284 ->291         | -0.12813  |           |           |          |  |
| 284 ->292         | -0.14124  |           |           |          |  |
| 284 ->293         | 0.36634   |           |           |          |  |
| 285 ->293         | -0.14610  |           |           |          |  |
| Excited State 87: | Singlet-A | 3.3076 eV | 374.85 nm | f=0.0010 |  |
| 271 ->288         | -0.11994  |           |           |          |  |
| 275 ->290         | -0.11121  |           |           |          |  |
| 276 ->287         | -0.18003  |           |           |          |  |
| 276 ->288         | 0.10551   |           |           |          |  |
| 277 ->288         | 0.13290   |           |           |          |  |
| 277 ->290         | -0.10938  |           |           |          |  |
| 278 ->286         | -0.16331  |           |           |          |  |
| 278 ->290         | -0.20746  |           |           |          |  |
| 283 ->292         | 0.10260   |           |           |          |  |

|                   |           |           |           |          |
|-------------------|-----------|-----------|-----------|----------|
| 284 ->291         | -0.10597  |           |           |          |
| 284 ->292         | -0.15884  |           |           |          |
| 284 ->293         | 0.35781   |           |           |          |
| Excited State 88: | Singlet-A | 3.3113 eV | 374.42 nm | f=0.0007 |
| 268 ->289         | 0.13156   |           |           |          |
| 271 ->290         | -0.10594  |           |           |          |
| 275 ->287         | 0.10236   |           |           |          |
| 275 ->289         | -0.19831  |           |           |          |
| 275 ->293         | 0.10940   |           |           |          |
| 276 ->286         | 0.11241   |           |           |          |
| 276 ->290         | 0.17555   |           |           |          |
| 277 ->286         | 0.10088   |           |           |          |
| 277 ->290         | 0.15295   |           |           |          |
| 278 ->287         | 0.11683   |           |           |          |
| 278 ->288         | -0.12760  |           |           |          |
| 278 ->290         | 0.11102   |           |           |          |
| 281 ->291         | -0.12922  |           |           |          |
| 282 ->289         | 0.11226   |           |           |          |
| 284 ->292         | -0.12726  |           |           |          |
| 284 ->293         | 0.27104   |           |           |          |
| 285 ->292         | -0.10673  |           |           |          |
| Excited State 89: | Singlet-A | 3.3119 eV | 374.36 nm | f=0.0008 |
| 268 ->289         | -0.10025  |           |           |          |
| 269 ->287         | -0.12014  |           |           |          |
| 270 ->287         | 0.12077   |           |           |          |
| 275 ->289         | 0.17957   |           |           |          |
| 275 ->290         | -0.13417  |           |           |          |
| 275 ->291         | -0.10211  |           |           |          |
| 276 ->286         | 0.10348   |           |           |          |
| 276 ->287         | -0.12657  |           |           |          |
| 276 ->290         | 0.23306   |           |           |          |
| 277 ->292         | 0.10645   |           |           |          |
| 278 ->287         | 0.12189   |           |           |          |
| 278 ->288         | -0.11382  |           |           |          |
| 278 ->289         | -0.13210  |           |           |          |
| 281 ->291         | 0.15335   |           |           |          |
| 282 ->289         | -0.11802  |           |           |          |
| 283 ->292         | -0.10051  |           |           |          |
| Excited State 90: | Singlet-A | 3.3290 eV | 372.44 nm | f=0.0012 |
| 270 ->292         | 0.11281   |           |           |          |
| 271 ->292         | -0.14045  |           |           |          |

|                   |           |           |           |          |  |
|-------------------|-----------|-----------|-----------|----------|--|
| 271 ->293         | -0.12336  |           |           |          |  |
| 272 ->289         | 0.10150   |           |           |          |  |
| 275 ->290         | 0.12720   |           |           |          |  |
| 275 ->291         | -0.18376  |           |           |          |  |
| 276 ->292         | 0.13699   |           |           |          |  |
| 277 ->291         | -0.13699  |           |           |          |  |
| 277 ->292         | -0.12832  |           |           |          |  |
| 278 ->291         | 0.10999   |           |           |          |  |
| 281 ->292         | -0.11179  |           |           |          |  |
| 281 ->293         | -0.11625  |           |           |          |  |
| 282 ->290         | -0.11723  |           |           |          |  |
| 282 ->291         | 0.21314   |           |           |          |  |
| 282 ->292         | 0.22463   |           |           |          |  |
| 283 ->291         | -0.11124  |           |           |          |  |
| 285 ->293         | -0.13254  |           |           |          |  |
| Excited State 91: | Singlet-A | 3.3334 eV | 371.94 nm | f=0.0001 |  |
| 280 ->287         | -0.11392  |           |           |          |  |
| 280 ->288         | 0.10847   |           |           |          |  |
| 280 ->289         | 0.59101   |           |           |          |  |
| 280 ->290         | 0.28596   |           |           |          |  |
| 280 ->293         | -0.15077  |           |           |          |  |
| Excited State 92: | Singlet-A | 3.3396 eV | 371.25 nm | f=0.0001 |  |
| 270 ->291         | -0.13518  |           |           |          |  |
| 271 ->290         | -0.14590  |           |           |          |  |
| 275 ->292         | 0.14849   |           |           |          |  |
| 276 ->289         | 0.13034   |           |           |          |  |
| 276 ->292         | -0.11279  |           |           |          |  |
| 276 ->293         | -0.11172  |           |           |          |  |
| 277 ->288         | -0.10416  |           |           |          |  |
| 277 ->289         | 0.13880   |           |           |          |  |
| 278 ->291         | 0.27578   |           |           |          |  |
| 282 ->292         | -0.12694  |           |           |          |  |
| 283 ->291         | -0.14031  |           |           |          |  |
| 283 ->292         | 0.12129   |           |           |          |  |
| 283 ->293         | 0.10978   |           |           |          |  |
| Excited State 93: | Singlet-A | 3.3451 eV | 370.65 nm | f=0.0002 |  |
| 271 ->289         | -0.13701  |           |           |          |  |
| 271 ->290         | 0.12451   |           |           |          |  |
| 275 ->291         | 0.11674   |           |           |          |  |
| 275 ->292         | -0.15856  |           |           |          |  |
| 276 ->291         | 0.18106   |           |           |          |  |

|                   |           |           |           |          |  |
|-------------------|-----------|-----------|-----------|----------|--|
| 277 ->289         | 0.12662   |           |           |          |  |
| 277 ->291         | 0.14411   |           |           |          |  |
| 277 ->292         | -0.13809  |           |           |          |  |
| 278 ->289         | 0.18200   |           |           |          |  |
| 278 ->291         | 0.16579   |           |           |          |  |
| 278 ->293         | -0.11967  |           |           |          |  |
| 282 ->293         | 0.17419   |           |           |          |  |
| 285 ->293         | 0.10904   |           |           |          |  |
| Excited State 94: | Singlet-A | 3.3458 eV | 370.56 nm | f=0.0001 |  |
| 274 ->288         | 0.10492   |           |           |          |  |
| 279 ->287         | 0.13180   |           |           |          |  |
| 279 ->288         | -0.11610  |           |           |          |  |
| 279 ->290         | 0.50101   |           |           |          |  |
| 282 ->293         | -0.13071  |           |           |          |  |
| 283 ->293         | 0.12521   |           |           |          |  |
| Excited State 95: | Singlet-A | 3.3468 eV | 370.45 nm | f=0.0004 |  |
| 268 ->291         | 0.11875   |           |           |          |  |
| 270 ->289         | 0.15716   |           |           |          |  |
| 271 ->289         | 0.11703   |           |           |          |  |
| 272 ->293         | -0.12338  |           |           |          |  |
| 275 ->291         | -0.14761  |           |           |          |  |
| 275 ->292         | 0.14839   |           |           |          |  |
| 275 ->293         | -0.15486  |           |           |          |  |
| 279 ->290         | 0.24710   |           |           |          |  |
| 282 ->293         | 0.19437   |           |           |          |  |
| 283 ->293         | -0.21161  |           |           |          |  |
| Excited State 96: | Singlet-A | 3.3505 eV | 370.05 nm | f=0.0007 |  |
| 270 ->289         | -0.13863  |           |           |          |  |
| 271 ->286         | 0.11715   |           |           |          |  |
| 275 ->290         | -0.11931  |           |           |          |  |
| 275 ->291         | -0.14399  |           |           |          |  |
| 275 ->293         | 0.10153   |           |           |          |  |
| 276 ->288         | 0.14275   |           |           |          |  |
| 276 ->289         | -0.14648  |           |           |          |  |
| 276 ->291         | 0.17914   |           |           |          |  |
| 278 ->289         | 0.11377   |           |           |          |  |
| 278 ->291         | -0.14023  |           |           |          |  |
| 278 ->292         | 0.10331   |           |           |          |  |
| 279 ->290         | 0.11153   |           |           |          |  |
| 282 ->293         | -0.10155  |           |           |          |  |
| 283 ->293         | 0.15737   |           |           |          |  |



|                    |           |           |           |          |
|--------------------|-----------|-----------|-----------|----------|
| Excited State 97:  | Singlet-A | 3.3512 eV | 369.97 nm | f=0.0002 |
| 271 ->286          | 0.10972   |           |           |          |
| 271 ->289          | -0.12130  |           |           |          |
| 274 ->288          | -0.26558  |           |           |          |
| 274 ->290          | -0.13813  |           |           |          |
| 274 ->291          | -0.11061  |           |           |          |
| 275 ->292          | -0.10450  |           |           |          |
| 276 ->291          | -0.17242  |           |           |          |
| 277 ->288          | -0.12763  |           |           |          |
| 277 ->291          | -0.12103  |           |           |          |
| 278 ->289          | -0.12183  |           |           |          |
| 278 ->291          | 0.13429   |           |           |          |
| 279 ->290          | 0.28807   |           |           |          |
| Excited State 98:  | Singlet-A | 3.3574 eV | 369.28 nm | f=0.0005 |
| 273 ->288          | 0.12378   |           |           |          |
| 274 ->288          | 0.27939   |           |           |          |
| 276 ->291          | -0.14409  |           |           |          |
| 276 ->292          | 0.12317   |           |           |          |
| 277 ->289          | 0.11554   |           |           |          |
| 277 ->290          | 0.13589   |           |           |          |
| 277 ->291          | -0.11481  |           |           |          |
| 277 ->293          | 0.12864   |           |           |          |
| 278 ->288          | 0.10089   |           |           |          |
| 281 ->289          | 0.10833   |           |           |          |
| 282 ->292          | -0.10414  |           |           |          |
| Excited State 99:  | Singlet-A | 3.3611 eV | 368.88 nm | f=0.0001 |
| 280 ->287          | -0.12218  |           |           |          |
| 280 ->289          | -0.19786  |           |           |          |
| 280 ->290          | 0.47968   |           |           |          |
| 280 ->291          | 0.12842   |           |           |          |
| 280 ->292          | 0.33650   |           |           |          |
| 280 ->293          | 0.19310   |           |           |          |
| Excited State 100: | Singlet-A | 3.3642 eV | 368.54 nm | f=0.0004 |
| 273 ->288          | -0.18968  |           |           |          |
| 277 ->293          | -0.10093  |           |           |          |
| 279 ->289          | 0.44544   |           |           |          |
| 279 ->292          | 0.17432   |           |           |          |
| 279 ->293          | -0.34863  |           |           |          |
| Excited State 101: | Singlet-A | 3.3657 eV | 368.38 nm | f=0.0004 |

|           |          |
|-----------|----------|
| 272 ->286 | 0.14352  |
| 272 ->289 | -0.12299 |
| 272 ->290 | -0.13234 |
| 273 ->288 | 0.33822  |
| 274 ->288 | 0.14513  |
| 276 ->291 | -0.11712 |
| 277 ->291 | 0.13016  |
| 277 ->292 | 0.15373  |
| 277 ->293 | -0.18305 |
| 280 ->290 | -0.10776 |
| 281 ->293 | -0.12533 |
| 282 ->292 | 0.11820  |

Excited State 102: Singlet-A 3.3668 eV 368.25 nm f=0.0002

|           |          |
|-----------|----------|
| 272 ->288 | 0.15073  |
| 273 ->286 | 0.10853  |
| 273 ->288 | 0.22572  |
| 273 ->290 | -0.12110 |
| 274 ->288 | -0.14661 |
| 275 ->293 | 0.11430  |
| 276 ->289 | -0.12780 |
| 276 ->290 | 0.10593  |
| 277 ->293 | 0.24975  |
| 278 ->291 | -0.10777 |
| 279 ->289 | 0.21138  |
| 279 ->293 | -0.16969 |
| 281 ->292 | -0.10133 |

Excited State 103: Singlet-A 3.3701 eV 367.90 nm f=0.0014

|           |          |
|-----------|----------|
| 269 ->288 | -0.11192 |
| 273 ->288 | -0.15615 |
| 275 ->292 | 0.10658  |
| 276 ->291 | -0.13930 |
| 276 ->292 | -0.13458 |
| 276 ->293 | -0.12803 |
| 277 ->289 | 0.12355  |
| 277 ->290 | -0.11500 |
| 277 ->291 | 0.11455  |
| 277 ->292 | 0.23977  |
| 277 ->293 | 0.12591  |
| 281 ->290 | 0.11355  |
| 281 ->291 | -0.10281 |
| 281 ->292 | -0.15811 |
| 281 ->293 | -0.13626 |

|                    |           |           |           |          |
|--------------------|-----------|-----------|-----------|----------|
| 282 ->291          | 0.10042   |           |           |          |
| 282 ->292          | 0.19314   |           |           |          |
| 282 ->293          | 0.13895   |           |           |          |
| Excited State 104: | Singlet-A | 3.3734 eV | 367.54 nm | f=0.0016 |
| 269 ->288          | -0.12971  |           |           |          |
| 270 ->288          | 0.14059   |           |           |          |
| 272 ->288          | 0.30973   |           |           |          |
| 272 ->290          | 0.11023   |           |           |          |
| 273 ->290          | -0.11757  |           |           |          |
| 274 ->288          | -0.23130  |           |           |          |
| 277 ->293          | -0.12228  |           |           |          |
| 278 ->289          | 0.11771   |           |           |          |
| Excited State 105: | Singlet-A | 3.3929 eV | 365.42 nm | f=0.0037 |
| 269 ->287          | 0.10481   |           |           |          |
| 269 ->288          | 0.32706   |           |           |          |
| 269 ->289          | 0.11670   |           |           |          |
| 269 ->290          | 0.12877   |           |           |          |
| 271 ->287          | 0.15884   |           |           |          |
| 272 ->287          | 0.13865   |           |           |          |
| 275 ->290          | -0.16400  |           |           |          |
| 276 ->289          | -0.10731  |           |           |          |
| 276 ->290          | -0.10467  |           |           |          |
| 276 ->291          | -0.10748  |           |           |          |
| 277 ->291          | 0.16402   |           |           |          |
| Excited State 106: | Singlet-A | 3.3990 eV | 364.77 nm | f=0.0000 |
| 279 ->291          | 0.13675   |           |           |          |
| 280 ->289          | -0.10915  |           |           |          |
| 280 ->291          | 0.58280   |           |           |          |
| 280 ->292          | -0.33354  |           |           |          |
| Excited State 107: | Singlet-A | 3.3995 eV | 364.71 nm | f=0.0000 |
| 279 ->291          | 0.57365   |           |           |          |
| 279 ->292          | -0.32535  |           |           |          |
| 280 ->291          | -0.14301  |           |           |          |
| Excited State 108: | Singlet-A | 3.4059 eV | 364.03 nm | f=0.0033 |
| 268 ->286          | 0.18377   |           |           |          |
| 268 ->288          | 0.27210   |           |           |          |
| 268 ->290          | -0.18393  |           |           |          |
| 269 ->286          | 0.19659   |           |           |          |
| 269 ->288          | 0.20589   |           |           |          |

|                    |           |           |           |          |
|--------------------|-----------|-----------|-----------|----------|
| 269 ->290          | -0.15497  |           |           |          |
| 270 ->288          | 0.10079   |           |           |          |
| 276 ->292          | 0.10591   |           |           |          |
| 281 ->292          | 0.12505   |           |           |          |
| Excited State 109: | Singlet-A | 3.4180 eV | 362.73 nm | f=0.0048 |
| 270 ->294          | 0.21214   |           |           |          |
| 272 ->294          | -0.16912  |           |           |          |
| 275 ->294          | -0.20247  |           |           |          |
| 276 ->294          | 0.10417   |           |           |          |
| 277 ->294          | 0.22780   |           |           |          |
| 278 ->294          | 0.27993   |           |           |          |
| 281 ->294          | -0.27721  |           |           |          |
| 285 ->294          | 0.24523   |           |           |          |
| Excited State 110: | Singlet-A | 3.4252 eV | 361.98 nm | f=0.0013 |
| 269 ->287          | 0.10400   |           |           |          |
| 269 ->289          | -0.15543  |           |           |          |
| 270 ->290          | 0.11602   |           |           |          |
| 270 ->291          | -0.14611  |           |           |          |
| 270 ->292          | -0.14902  |           |           |          |
| 271 ->290          | -0.10786  |           |           |          |
| 271 ->291          | 0.11159   |           |           |          |
| 271 ->292          | 0.19747   |           |           |          |
| 271 ->293          | 0.14225   |           |           |          |
| 272 ->287          | 0.13161   |           |           |          |
| 275 ->291          | -0.12350  |           |           |          |
| 277 ->292          | -0.12413  |           |           |          |
| 278 ->291          | 0.10648   |           |           |          |
| 278 ->292          | 0.22184   |           |           |          |
| 281 ->292          | -0.11057  |           |           |          |
| 281 ->293          | -0.12056  |           |           |          |
| Excited State 111: | Singlet-A | 3.4302 eV | 361.45 nm | f=0.0084 |
| 268 ->291          | 0.10566   |           |           |          |
| 269 ->288          | -0.18939  |           |           |          |
| 271 ->287          | 0.19399   |           |           |          |
| 271 ->289          | -0.13783  |           |           |          |
| 272 ->286          | 0.10348   |           |           |          |
| 272 ->287          | 0.19630   |           |           |          |
| 272 ->289          | -0.10973  |           |           |          |
| 273 ->287          | -0.11851  |           |           |          |
| 275 ->286          | 0.17888   |           |           |          |
| 275 ->290          | 0.14260   |           |           |          |

|                    |           |           |           |          |
|--------------------|-----------|-----------|-----------|----------|
| 276 ->290          | 0.10030   |           |           |          |
| 277 ->290          | -0.11781  |           |           |          |
| 281 ->293          | 0.15285   |           |           |          |
| Excited State 112: | Singlet-A | 3.4349 eV | 360.96 nm | f=0.0020 |
| 268 ->287          | -0.10262  |           |           |          |
| 269 ->287          | 0.19745   |           |           |          |
| 269 ->289          | -0.21709  |           |           |          |
| 269 ->291          | 0.16985   |           |           |          |
| 270 ->289          | 0.23622   |           |           |          |
| 270 ->291          | -0.13984  |           |           |          |
| 270 ->293          | 0.17380   |           |           |          |
| 275 ->287          | 0.15013   |           |           |          |
| 276 ->293          | -0.11350  |           |           |          |
| 278 ->293          | -0.19453  |           |           |          |
| 281 ->292          | 0.13262   |           |           |          |
| 281 ->293          | -0.12072  |           |           |          |
| Excited State 113: | Singlet-A | 3.4436 eV | 360.04 nm | f=0.0153 |
| 271 ->288          | -0.16265  |           |           |          |
| 271 ->295          | 0.15161   |           |           |          |
| 272 ->295          | -0.10618  |           |           |          |
| 274 ->288          | 0.10652   |           |           |          |
| 274 ->295          | -0.13562  |           |           |          |
| 275 ->287          | 0.11160   |           |           |          |
| 275 ->295          | 0.12107   |           |           |          |
| 276 ->295          | 0.25195   |           |           |          |
| 278 ->295          | -0.24484  |           |           |          |
| 281 ->295          | -0.18300  |           |           |          |
| 285 ->295          | 0.14460   |           |           |          |
| Excited State 114: | Singlet-A | 3.4457 eV | 359.83 nm | f=0.0030 |
| 269 ->287          | 0.11715   |           |           |          |
| 270 ->293          | -0.11691  |           |           |          |
| 271 ->291          | -0.11286  |           |           |          |
| 271 ->292          | 0.11389   |           |           |          |
| 274 ->286          | -0.16539  |           |           |          |
| 274 ->287          | -0.10016  |           |           |          |
| 274 ->289          | 0.31135   |           |           |          |
| 274 ->290          | 0.17543   |           |           |          |
| 274 ->291          | -0.10077  |           |           |          |
| 274 ->292          | 0.18344   |           |           |          |
| 274 ->293          | -0.19608  |           |           |          |
| 278 ->293          | 0.11845   |           |           |          |

|                    |           |           |           |          |
|--------------------|-----------|-----------|-----------|----------|
| Excited State 115: | Singlet-A | 3.4519 eV | 359.17 nm | f=0.0012 |
| 271 ->288          | -0.16096  |           |           |          |
| 271 ->289          | 0.10248   |           |           |          |
| 271 ->290          | 0.10185   |           |           |          |
| 272 ->286          | 0.17055   |           |           |          |
| 273 ->286          | -0.12173  |           |           |          |
| 274 ->286          | 0.17392   |           |           |          |
| 275 ->287          | 0.18315   |           |           |          |
| 276 ->288          | -0.10405  |           |           |          |
| 276 ->295          | -0.15132  |           |           |          |
| 278 ->295          | 0.14694   |           |           |          |
| 281 ->295          | 0.11456   |           |           |          |

|                    |           |           |           |          |
|--------------------|-----------|-----------|-----------|----------|
| Excited State 116: | Singlet-A | 3.4578 eV | 358.56 nm | f=0.0008 |
| 268 ->289          | -0.15820  |           |           |          |
| 268 ->292          | 0.10821   |           |           |          |
| 268 ->293          | 0.10379   |           |           |          |
| 269 ->289          | -0.15346  |           |           |          |
| 269 ->291          | -0.10284  |           |           |          |
| 269 ->292          | 0.10289   |           |           |          |
| 269 ->293          | 0.14726   |           |           |          |
| 270 ->289          | -0.10761  |           |           |          |
| 270 ->292          | 0.15413   |           |           |          |
| 271 ->292          | -0.10551  |           |           |          |
| 273 ->289          | -0.13640  |           |           |          |
| 273 ->290          | 0.11391   |           |           |          |
| 273 ->292          | 0.14202   |           |           |          |
| 273 ->293          | 0.12957   |           |           |          |
| 275 ->292          | 0.16448   |           |           |          |
| 277 ->292          | -0.10116  |           |           |          |

|                    |           |           |           |          |
|--------------------|-----------|-----------|-----------|----------|
| Excited State 117: | Singlet-A | 3.4607 eV | 358.27 nm | f=0.0009 |
| 269 ->286          | -0.16235  |           |           |          |
| 271 ->288          | 0.11556   |           |           |          |
| 271 ->291          | -0.14688  |           |           |          |
| 272 ->286          | -0.14863  |           |           |          |
| 272 ->287          | -0.15531  |           |           |          |
| 272 ->290          | 0.15422   |           |           |          |
| 272 ->291          | -0.11505  |           |           |          |
| 272 ->292          | 0.11501   |           |           |          |
| 274 ->286          | 0.19173   |           |           |          |
| 274 ->293          | 0.10752   |           |           |          |
| 275 ->288          | 0.10179   |           |           |          |

|                    |           |           |           |          |
|--------------------|-----------|-----------|-----------|----------|
| 275 ->289          | -0.16196  |           |           |          |
| 275 ->291          | -0.10074  |           |           |          |
| 277 ->293          | -0.11502  |           |           |          |
| Excited State 118: | Singlet-A | 3.4642 eV | 357.90 nm | f=0.0022 |
| 269 ->287          | -0.12793  |           |           |          |
| 269 ->291          | -0.11943  |           |           |          |
| 269 ->292          | 0.19065   |           |           |          |
| 269 ->293          | -0.13218  |           |           |          |
| 270 ->292          | -0.10353  |           |           |          |
| 270 ->293          | 0.23253   |           |           |          |
| 271 ->287          | -0.12134  |           |           |          |
| 271 ->290          | 0.13735   |           |           |          |
| 273 ->292          | 0.10526   |           |           |          |
| 274 ->286          | -0.14186  |           |           |          |
| 274 ->290          | 0.16282   |           |           |          |
| 275 ->293          | 0.14680   |           |           |          |
| 277 ->289          | 0.10629   |           |           |          |
| 278 ->293          | -0.10491  |           |           |          |
| 282 ->293          | -0.11275  |           |           |          |
| Excited State 119: | Singlet-A | 3.4680 eV | 357.51 nm | f=0.0009 |
| 271 ->286          | 0.12072   |           |           |          |
| 271 ->288          | 0.18536   |           |           |          |
| 272 ->286          | 0.11547   |           |           |          |
| 272 ->287          | -0.10208  |           |           |          |
| 272 ->288          | -0.16801  |           |           |          |
| 272 ->289          | 0.21172   |           |           |          |
| 272 ->293          | -0.12558  |           |           |          |
| 273 ->288          | 0.11092   |           |           |          |
| 273 ->290          | -0.12521  |           |           |          |
| 273 ->292          | -0.12675  |           |           |          |
| 274 ->288          | -0.20301  |           |           |          |
| 274 ->289          | -0.12269  |           |           |          |
| 274 ->290          | 0.11038   |           |           |          |
| 274 ->291          | 0.21599   |           |           |          |
| 274 ->292          | -0.13801  |           |           |          |
| 274 ->293          | 0.16734   |           |           |          |
| Excited State 120: | Singlet-A | 3.4721 eV | 357.08 nm | f=0.0031 |
| 269 ->289          | -0.12423  |           |           |          |
| 270 ->288          | 0.10695   |           |           |          |
| 271 ->286          | -0.12982  |           |           |          |
| 271 ->288          | -0.10243  |           |           |          |

|           |          |
|-----------|----------|
| 271 ->289 | -0.12237 |
| 272 ->287 | -0.11366 |
| 272 ->288 | 0.17108  |
| 272 ->290 | -0.12063 |
| 273 ->288 | -0.10792 |
| 273 ->289 | 0.20618  |
| 273 ->292 | -0.13384 |
| 273 ->293 | -0.10339 |
| 274 ->286 | -0.20011 |
| 274 ->287 | -0.11299 |
| 274 ->289 | -0.10641 |
| 274 ->290 | 0.13055  |
| 274 ->291 | 0.11967  |
| 275 ->286 | -0.11203 |
| 277 ->291 | 0.12527  |

Excited State 121: Singlet-A 3.4736 eV 356.93 nm f=0.0010

|           |          |
|-----------|----------|
| 268 ->289 | -0.13647 |
| 269 ->287 | 0.11029  |
| 269 ->291 | -0.14291 |
| 269 ->292 | 0.12427  |
| 272 ->289 | 0.13902  |
| 272 ->290 | -0.15973 |
| 272 ->292 | -0.19327 |
| 273 ->287 | -0.17740 |
| 273 ->289 | 0.20781  |
| 273 ->290 | -0.14866 |
| 273 ->292 | -0.16108 |
| 273 ->293 | -0.16423 |

Excited State 122: Singlet-A 3.4791 eV 356.37 nm f=0.0004

|           |          |
|-----------|----------|
| 268 ->286 | 0.11955  |
| 268 ->287 | -0.14981 |
| 269 ->286 | -0.17996 |
| 269 ->287 | 0.26966  |
| 269 ->290 | -0.18451 |
| 270 ->288 | 0.17917  |
| 271 ->287 | 0.10627  |
| 272 ->289 | -0.13261 |
| 272 ->290 | -0.11079 |
| 273 ->290 | 0.11216  |
| 275 ->286 | -0.10218 |
| 275 ->287 | 0.11899  |
| 275 ->290 | -0.19305 |



|                    |           |           |           |          |
|--------------------|-----------|-----------|-----------|----------|
| Excited State 123: | Singlet-A | 3.4832 eV | 355.95 nm | f=0.0005 |
| 277 ->292          | 0.13112   |           |           |          |
| 278 ->292          | 0.11872   |           |           |          |
| 279 ->290          | -0.12487  |           |           |          |
| 279 ->291          | 0.18495   |           |           |          |
| 279 ->292          | 0.41528   |           |           |          |
| 279 ->293          | 0.29536   |           |           |          |

|                    |           |           |           |          |
|--------------------|-----------|-----------|-----------|----------|
| Excited State 124: | Singlet-A | 3.4841 eV | 355.86 nm | f=0.0013 |
| 269 ->291          | 0.10373   |           |           |          |
| 271 ->288          | 0.14663   |           |           |          |
| 271 ->291          | 0.11967   |           |           |          |
| 272 ->287          | -0.10775  |           |           |          |
| 272 ->288          | -0.10092  |           |           |          |
| 272 ->289          | -0.15013  |           |           |          |
| 272 ->291          | 0.20449   |           |           |          |
| 272 ->292          | -0.10327  |           |           |          |
| 273 ->291          | -0.10645  |           |           |          |
| 274 ->286          | 0.14023   |           |           |          |
| 275 ->291          | -0.12768  |           |           |          |
| 277 ->291          | 0.15028   |           |           |          |
| 279 ->292          | 0.19281   |           |           |          |
| 279 ->293          | 0.14594   |           |           |          |

|                    |           |           |           |          |
|--------------------|-----------|-----------|-----------|----------|
| Excited State 125: | Singlet-A | 3.4890 eV | 355.36 nm | f=0.0002 |
| 269 ->292          | 0.10423   |           |           |          |
| 271 ->292          | -0.10596  |           |           |          |
| 276 ->291          | 0.12547   |           |           |          |
| 276 ->292          | 0.25665   |           |           |          |
| 277 ->290          | -0.10906  |           |           |          |
| 277 ->291          | 0.11257   |           |           |          |
| 277 ->292          | 0.21742   |           |           |          |
| 277 ->293          | 0.10851   |           |           |          |
| 278 ->290          | -0.10204  |           |           |          |
| 278 ->292          | 0.21366   |           |           |          |
| 278 ->293          | 0.24034   |           |           |          |
| 279 ->291          | -0.11634  |           |           |          |
| 279 ->292          | -0.24430  |           |           |          |
| 279 ->293          | -0.17922  |           |           |          |

|                    |           |           |           |          |
|--------------------|-----------|-----------|-----------|----------|
| Excited State 126: | Singlet-A | 3.4915 eV | 355.11 nm | f=0.0001 |
| 276 ->293          | -0.19784  |           |           |          |
| 278 ->292          | -0.11790  |           |           |          |

|                    |           |           |           |          |
|--------------------|-----------|-----------|-----------|----------|
| 280 ->289          | 0.11448   |           |           |          |
| 280 ->291          | -0.14061  |           |           |          |
| 280 ->292          | -0.23951  |           |           |          |
| 280 ->293          | 0.54370   |           |           |          |
| Excited State 127: | Singlet-A | 3.4930 eV | 354.95 nm | f=0.0005 |
| 269 ->293          | 0.10331   |           |           |          |
| 275 ->293          | -0.13333  |           |           |          |
| 276 ->289          | 0.13760   |           |           |          |
| 276 ->292          | -0.13025  |           |           |          |
| 276 ->293          | 0.36956   |           |           |          |
| 277 ->293          | 0.13693   |           |           |          |
| 278 ->292          | 0.18759   |           |           |          |
| 278 ->293          | -0.23134  |           |           |          |
| 280 ->292          | -0.12669  |           |           |          |
| 280 ->293          | 0.28591   |           |           |          |
| 284 ->293          | -0.10060  |           |           |          |
| Excited State 128: | Singlet-A | 3.5082 eV | 353.41 nm | f=0.0013 |
| 268 ->286          | -0.15358  |           |           |          |
| 269 ->287          | -0.10937  |           |           |          |
| 269 ->288          | 0.13627   |           |           |          |
| 270 ->288          | 0.22471   |           |           |          |
| 272 ->288          | -0.19614  |           |           |          |
| 272 ->290          | -0.17271  |           |           |          |
| 272 ->291          | -0.19773  |           |           |          |
| 273 ->287          | -0.13615  |           |           |          |
| 273 ->289          | -0.13082  |           |           |          |
| 274 ->291          | -0.10309  |           |           |          |
| 285 ->296          | -0.11652  |           |           |          |
| Excited State 129: | Singlet-A | 3.5118 eV | 353.05 nm | f=0.0005 |
| 270 ->296          | 0.19407   |           |           |          |
| 272 ->296          | -0.15169  |           |           |          |
| 273 ->287          | -0.14988  |           |           |          |
| 273 ->288          | -0.12250  |           |           |          |
| 273 ->289          | -0.14713  |           |           |          |
| 275 ->296          | -0.17447  |           |           |          |
| 277 ->296          | 0.18758   |           |           |          |
| 278 ->296          | 0.22991   |           |           |          |
| 281 ->296          | -0.17849  |           |           |          |
| 285 ->296          | 0.27454   |           |           |          |
| Excited State 130: | Singlet-A | 3.5147 eV | 352.76 nm | f=0.0014 |

|           |          |
|-----------|----------|
| 270 ->288 | 0.21026  |
| 272 ->287 | 0.11456  |
| 272 ->289 | 0.11508  |
| 273 ->286 | -0.11748 |
| 273 ->287 | 0.22901  |
| 273 ->288 | 0.21722  |
| 273 ->289 | 0.20221  |
| 273 ->290 | 0.16183  |
| 273 ->291 | 0.15886  |
| 278 ->296 | 0.11329  |
| 285 ->296 | 0.13631  |
| 285 ->298 | 0.10804  |

Excited State 131: Singlet-A 3.5166 eV 352.57 nm f=0.0025

|           |          |
|-----------|----------|
| 271 ->297 | 0.16275  |
| 272 ->297 | -0.10702 |
| 273 ->297 | 0.10351  |
| 274 ->297 | -0.14163 |
| 275 ->297 | 0.12044  |
| 276 ->297 | 0.24464  |
| 278 ->297 | -0.23387 |
| 281 ->297 | -0.13342 |
| 281 ->298 | 0.12526  |
| 283 ->297 | -0.11739 |
| 284 ->297 | 0.16102  |
| 284 ->300 | 0.15973  |
| 285 ->297 | 0.16015  |
| 285 ->298 | -0.18765 |

Excited State 132: Singlet-A 3.5209 eV 352.14 nm f=0.0012

|           |          |
|-----------|----------|
| 270 ->294 | -0.17583 |
| 276 ->294 | -0.18102 |
| 277 ->294 | -0.11940 |
| 278 ->294 | -0.22718 |
| 281 ->294 | -0.25573 |
| 283 ->294 | -0.31280 |
| 285 ->294 | 0.38519  |

Excited State 133: Singlet-A 3.5239 eV 351.83 nm f=0.0152

|           |          |
|-----------|----------|
| 271 ->297 | 0.10906  |
| 276 ->297 | 0.16228  |
| 278 ->297 | -0.15522 |
| 281 ->298 | -0.26693 |
| 281 ->302 | 0.14298  |

|                    |           |           |           |          |
|--------------------|-----------|-----------|-----------|----------|
| 283 ->298          | -0.11023  |           |           |          |
| 284 ->297          | 0.11146   |           |           |          |
| 285 ->298          | 0.36041   |           |           |          |
| Excited State 134: | Singlet-A | 3.5278 eV | 351.45 nm | f=0.0026 |
| 268 ->286          | -0.20550  |           |           |          |
| 268 ->287          | -0.10332  |           |           |          |
| 268 ->288          | 0.30625   |           |           |          |
| 268 ->289          | -0.12299  |           |           |          |
| 269 ->286          | -0.24189  |           |           |          |
| 269 ->288          | 0.10060   |           |           |          |
| 269 ->290          | -0.10481  |           |           |          |
| 270 ->286          | -0.10364  |           |           |          |
| 270 ->288          | -0.12375  |           |           |          |
| 271 ->286          | -0.15134  |           |           |          |
| 275 ->286          | 0.18220   |           |           |          |
| 275 ->287          | 0.10569   |           |           |          |
| Excited State 135: | Singlet-A | 3.5414 eV | 350.10 nm | f=0.0007 |
| 274 ->286          | 0.17428   |           |           |          |
| 274 ->287          | 0.17186   |           |           |          |
| 274 ->288          | -0.11743  |           |           |          |
| 274 ->289          | -0.13672  |           |           |          |
| 274 ->290          | 0.34266   |           |           |          |
| 274 ->291          | -0.13935  |           |           |          |
| 274 ->292          | 0.21707   |           |           |          |
| 274 ->293          | 0.11236   |           |           |          |
| 284 ->300          | 0.17990   |           |           |          |
| 285 ->295          | 0.11496   |           |           |          |
| Excited State 136: | Singlet-A | 3.5434 eV | 349.90 nm | f=0.0012 |
| 274 ->286          | -0.12955  |           |           |          |
| 274 ->290          | -0.18747  |           |           |          |
| 274 ->292          | -0.10344  |           |           |          |
| 281 ->295          | -0.13264  |           |           |          |
| 284 ->300          | 0.28564   |           |           |          |
| 285 ->295          | 0.19796   |           |           |          |
| 285 ->300          | -0.16985  |           |           |          |
| 285 ->301          | -0.14905  |           |           |          |
| Excited State 137: | Singlet-A | 3.5518 eV | 349.08 nm | f=0.0007 |
| 278 ->299          | 0.12085   |           |           |          |
| 283 ->298          | 0.20045   |           |           |          |
| 283 ->299          | 0.22976   |           |           |          |

|                    |           |           |           |          |
|--------------------|-----------|-----------|-----------|----------|
| 285 ->295          | -0.10392  |           |           |          |
| 285 ->299          | 0.27682   |           |           |          |
| 285 ->301          | -0.13831  |           |           |          |
| 285 ->302          | 0.16445   |           |           |          |
| Excited State 138: | Singlet-A | 3.5543 eV | 348.82 nm | f=0.0029 |
| 270 ->287          | -0.10523  |           |           |          |
| 271 ->287          | 0.20075   |           |           |          |
| 271 ->289          | -0.14087  |           |           |          |
| 271 ->290          | 0.12407   |           |           |          |
| 271 ->292          | 0.14624   |           |           |          |
| 271 ->293          | 0.11457   |           |           |          |
| 272 ->290          | -0.12097  |           |           |          |
| 274 ->286          | 0.12621   |           |           |          |
| 283 ->300          | 0.12024   |           |           |          |
| 284 ->301          | 0.13281   |           |           |          |
| 285 ->300          | -0.12310  |           |           |          |
| Excited State 139: | Singlet-A | 3.5615 eV | 348.12 nm | f=0.0002 |
| 276 ->300          | -0.13458  |           |           |          |
| 278 ->300          | 0.12081   |           |           |          |
| 282 ->300          | -0.11173  |           |           |          |
| 283 ->300          | 0.18573   |           |           |          |
| 284 ->298          | 0.15712   |           |           |          |
| 284 ->300          | -0.24663  |           |           |          |
| 284 ->301          | 0.24951   |           |           |          |
| 284 ->302          | 0.14484   |           |           |          |
| 285 ->300          | -0.19178  |           |           |          |
| Excited State 140: | Singlet-A | 3.5653 eV | 347.75 nm | f=0.0015 |
| 276 ->295          | -0.13589  |           |           |          |
| 278 ->295          | 0.12364   |           |           |          |
| 281 ->295          | -0.23383  |           |           |          |
| 282 ->295          | -0.20560  |           |           |          |
| 283 ->300          | -0.10020  |           |           |          |
| 284 ->300          | -0.18579  |           |           |          |
| 285 ->295          | 0.37713   |           |           |          |
| 285 ->299          | 0.11758   |           |           |          |
| 285 ->300          | 0.13076   |           |           |          |
| Excited State 141: | Singlet-A | 3.5689 eV | 347.40 nm | f=0.0005 |
| 269 ->286          | -0.19951  |           |           |          |
| 270 ->286          | 0.26499   |           |           |          |
| 270 ->287          | 0.13404   |           |           |          |

|                    |           |           |           |          |
|--------------------|-----------|-----------|-----------|----------|
| 270 ->288          | 0.16526   |           |           |          |
| 270 ->290          | -0.11608  |           |           |          |
| 271 ->286          | 0.14561   |           |           |          |
| 271 ->290          | -0.11633  |           |           |          |
| 272 ->287          | -0.10201  |           |           |          |
| 272 ->290          | 0.13256   |           |           |          |
| 273 ->287          | -0.21171  |           |           |          |
| 273 ->290          | 0.13456   |           |           |          |
| 274 ->289          | 0.11924   |           |           |          |
| 274 ->291          | 0.10788   |           |           |          |
| Excited State 142: | Singlet-A | 3.5709 eV | 347.21 nm | f=0.0005 |
| 269 ->288          | 0.10075   |           |           |          |
| 270 ->286          | -0.24295  |           |           |          |
| 270 ->290          | 0.13786   |           |           |          |
| 271 ->287          | -0.10735  |           |           |          |
| 271 ->288          | -0.12852  |           |           |          |
| 272 ->291          | -0.10555  |           |           |          |
| 274 ->286          | 0.17919   |           |           |          |
| 274 ->287          | 0.13053   |           |           |          |
| 274 ->288          | -0.11003  |           |           |          |
| 274 ->289          | 0.24033   |           |           |          |
| 274 ->291          | 0.29347   |           |           |          |
| 274 ->292          | -0.12493  |           |           |          |
| Excited State 143: | Singlet-A | 3.5727 eV | 347.03 nm | f=0.0002 |
| 270 ->287          | -0.11091  |           |           |          |
| 272 ->286          | 0.12067   |           |           |          |
| 272 ->287          | -0.13853  |           |           |          |
| 272 ->289          | 0.14167   |           |           |          |
| 272 ->290          | 0.14454   |           |           |          |
| 273 ->287          | -0.28490  |           |           |          |
| 273 ->288          | 0.10907   |           |           |          |
| 273 ->289          | 0.16487   |           |           |          |
| 273 ->290          | 0.29375   |           |           |          |
| 273 ->291          | -0.11242  |           |           |          |
| 273 ->292          | 0.18572   |           |           |          |
| 274 ->289          | -0.10100  |           |           |          |
| 274 ->291          | -0.15688  |           |           |          |
| Excited State 144: | Singlet-A | 3.5763 eV | 346.68 nm | f=0.0007 |
| 282 ->299          | -0.20130  |           |           |          |
| 282 ->301          | -0.11782  |           |           |          |
| 283 ->299          | -0.10220  |           |           |          |

|                    |           |           |           |          |
|--------------------|-----------|-----------|-----------|----------|
| 284 ->294          | 0.56104   |           |           |          |
| Excited State 145: | Singlet-A | 3.5767 eV | 346.65 nm | f=0.0009 |
| 282 ->299          | 0.28259   |           |           |          |
| 282 ->301          | 0.15948   |           |           |          |
| 282 ->302          | -0.13283  |           |           |          |
| 283 ->299          | 0.14499   |           |           |          |
| 283 ->301          | 0.11639   |           |           |          |
| 284 ->294          | 0.40874   |           |           |          |
| 285 ->299          | -0.10760  |           |           |          |
| Excited State 146: | Singlet-A | 3.5825 eV | 346.08 nm | f=0.0003 |
| 269 ->287          | -0.11787  |           |           |          |
| 270 ->286          | 0.12092   |           |           |          |
| 270 ->287          | -0.12928  |           |           |          |
| 270 ->289          | -0.14072  |           |           |          |
| 270 ->291          | -0.11039  |           |           |          |
| 271 ->287          | 0.27025   |           |           |          |
| 271 ->288          | 0.13963   |           |           |          |
| 271 ->289          | 0.24637   |           |           |          |
| 271 ->291          | 0.10858   |           |           |          |
| 272 ->289          | -0.10879  |           |           |          |
| 272 ->291          | -0.10491  |           |           |          |
| 273 ->289          | 0.17010   |           |           |          |
| 274 ->286          | 0.12808   |           |           |          |
| 274 ->288          | -0.12687  |           |           |          |
| 274 ->291          | 0.10166   |           |           |          |
| Excited State 147: | Singlet-A | 3.5919 eV | 345.17 nm | f=0.0010 |
| 268 ->286          | 0.25158   |           |           |          |
| 268 ->287          | 0.10523   |           |           |          |
| 268 ->288          | 0.10834   |           |           |          |
| 269 ->286          | -0.15634  |           |           |          |
| 269 ->290          | 0.19896   |           |           |          |
| 270 ->289          | 0.19436   |           |           |          |
| 270 ->292          | 0.12623   |           |           |          |
| 270 ->293          | -0.16772  |           |           |          |
| 272 ->286          | 0.11029   |           |           |          |
| 272 ->289          | -0.11473  |           |           |          |
| 272 ->292          | -0.10937  |           |           |          |
| 272 ->293          | 0.10362   |           |           |          |
| 273 ->290          | 0.10315   |           |           |          |
| Excited State 148: | Singlet-A | 3.5993 eV | 344.47 nm | f=0.0008 |

|                    |           |           |           |          |
|--------------------|-----------|-----------|-----------|----------|
| 268 ->286          | -0.20623  |           |           |          |
| 268 ->288          | -0.10659  |           |           |          |
| 269 ->290          | -0.10987  |           |           |          |
| 270 ->286          | 0.19563   |           |           |          |
| 270 ->289          | 0.15697   |           |           |          |
| 270 ->291          | -0.12830  |           |           |          |
| 270 ->293          | -0.14382  |           |           |          |
| 271 ->291          | -0.10692  |           |           |          |
| 272 ->286          | -0.11439  |           |           |          |
| 272 ->289          | -0.11733  |           |           |          |
| 272 ->290          | 0.14087   |           |           |          |
| 272 ->291          | 0.21812   |           |           |          |
| 272 ->292          | -0.11339  |           |           |          |
| Excited State 149: | Singlet-A | 3.6065 eV | 343.78 nm | f=0.0012 |
| 273 ->291          | 0.13133   |           |           |          |
| 281 ->303          | -0.10104  |           |           |          |
| 282 ->298          | 0.19299   |           |           |          |
| 282 ->299          | 0.10495   |           |           |          |
| 283 ->299          | 0.17561   |           |           |          |
| 283 ->301          | -0.11275  |           |           |          |
| 283 ->302          | -0.13352  |           |           |          |
| 284 ->300          | 0.20519   |           |           |          |
| 285 ->301          | 0.32222   |           |           |          |
| Excited State 150: | Singlet-A | 3.6104 eV | 343.41 nm | f=0.0001 |
| 270 ->289          | -0.10572  |           |           |          |
| 270 ->291          | 0.12175   |           |           |          |
| 272 ->291          | 0.18737   |           |           |          |
| 273 ->287          | -0.14886  |           |           |          |
| 273 ->289          | -0.21469  |           |           |          |
| 273 ->290          | 0.14755   |           |           |          |
| 273 ->291          | 0.43038   |           |           |          |
| 273 ->292          | -0.17220  |           |           |          |
| 273 ->293          | 0.11274   |           |           |          |
| 285 ->301          | -0.11204  |           |           |          |
| Excited State 151: | Singlet-A | 3.6138 eV | 343.09 nm | f=0.0002 |
| 275 ->294          | 0.10659   |           |           |          |
| 276 ->294          | 0.19557   |           |           |          |
| 278 ->294          | 0.13965   |           |           |          |
| 281 ->294          | 0.31618   |           |           |          |
| 282 ->294          | 0.43005   |           |           |          |
| 283 ->294          | -0.25838  |           |           |          |



|                    |           |           |           |          |
|--------------------|-----------|-----------|-----------|----------|
| 285 ->294          | 0.21305   |           |           |          |
| Excited State 152: | Singlet-A | 3.6188 eV | 342.62 nm | f=0.0052 |
| 275 ->301          | 0.12102   |           |           |          |
| 277 ->298          | 0.10580   |           |           |          |
| 281 ->298          | 0.13258   |           |           |          |
| 282 ->299          | -0.12645  |           |           |          |
| 282 ->301          | 0.23814   |           |           |          |
| 283 ->299          | -0.11437  |           |           |          |
| 283 ->301          | -0.19560  |           |           |          |
| 283 ->302          | -0.10475  |           |           |          |
| 283 ->303          | 0.10336   |           |           |          |
| 284 ->300          | 0.15935   |           |           |          |
| 285 ->298          | 0.11976   |           |           |          |
| 285 ->299          | -0.11689  |           |           |          |
| 285 ->302          | 0.32014   |           |           |          |
| Excited State 153: | Singlet-A | 3.6284 eV | 341.70 nm | f=0.0002 |
| 282 ->295          | 0.23071   |           |           |          |
| 283 ->295          | 0.57718   |           |           |          |
| 285 ->295          | 0.27695   |           |           |          |
| Excited State 154: | Singlet-A | 3.6310 eV | 341.46 nm | f=0.0007 |
| 268 ->286          | -0.15739  |           |           |          |
| 268 ->290          | 0.12321   |           |           |          |
| 269 ->287          | 0.15593   |           |           |          |
| 270 ->287          | 0.18607   |           |           |          |
| 270 ->288          | -0.10512  |           |           |          |
| 271 ->286          | 0.12775   |           |           |          |
| 271 ->287          | -0.20147  |           |           |          |
| 271 ->289          | 0.11099   |           |           |          |
| 271 ->290          | 0.24733   |           |           |          |
| 271 ->292          | 0.18466   |           |           |          |
| 272 ->290          | -0.13110  |           |           |          |
| 273 ->290          | 0.13931   |           |           |          |
| 274 ->290          | -0.11992  |           |           |          |
| Excited State 155: | Singlet-A | 3.6323 eV | 341.34 nm | f=0.0054 |
| 268 ->286          | -0.12483  |           |           |          |
| 268 ->287          | 0.25160   |           |           |          |
| 268 ->288          | 0.19489   |           |           |          |
| 268 ->289          | 0.11937   |           |           |          |
| 268 ->290          | 0.13866   |           |           |          |
| 269 ->288          | 0.10201   |           |           |          |

|           |          |
|-----------|----------|
| 269 ->289 | 0.12973  |
| 269 ->290 | 0.13304  |
| 270 ->290 | 0.13298  |
| 271 ->287 | 0.12152  |
| 271 ->288 | -0.11665 |
| 271 ->289 | -0.10925 |
| 271 ->290 | -0.15534 |
| 281 ->303 | -0.10847 |
| 282 ->302 | -0.11254 |
| 285 ->303 | 0.14592  |

Excited State 156: Singlet-A 3.6331 eV 341.26 nm f=0.0000

|           |          |
|-----------|----------|
| 269 ->292 | 0.16022  |
| 270 ->292 | 0.13468  |
| 271 ->290 | -0.18686 |
| 271 ->291 | 0.10867  |
| 271 ->292 | 0.18987  |
| 272 ->290 | -0.10746 |
| 272 ->291 | 0.15514  |
| 272 ->292 | 0.26421  |
| 272 ->293 | 0.10710  |
| 273 ->292 | -0.15560 |
| 274 ->292 | 0.10330  |
| 275 ->290 | -0.12779 |
| 275 ->291 | 0.12233  |
| 275 ->292 | 0.18329  |
| 275 ->293 | 0.14736  |
| 277 ->292 | -0.10394 |
| 277 ->293 | -0.10110 |

Excited State 157: Singlet-A 3.6379 eV 340.82 nm f=0.0006

|           |          |
|-----------|----------|
| 268 ->287 | -0.14720 |
| 268 ->288 | -0.13073 |
| 270 ->290 | -0.17238 |
| 277 ->298 | -0.12720 |
| 281 ->299 | -0.10547 |
| 281 ->303 | -0.18949 |
| 282 ->302 | -0.15310 |
| 282 ->303 | -0.11198 |
| 285 ->303 | 0.25023  |

Excited State 158: Singlet-A 3.6430 eV 340.34 nm f=0.0002

|           |          |
|-----------|----------|
| 268 ->286 | 0.14623  |
| 268 ->288 | -0.14714 |

|                    |           |           |           |          |
|--------------------|-----------|-----------|-----------|----------|
| 268 ->289          | -0.12511  |           |           |          |
| 269 ->286          | -0.17639  |           |           |          |
| 269 ->287          | -0.14917  |           |           |          |
| 269 ->290          | -0.23957  |           |           |          |
| 269 ->292          | -0.11700  |           |           |          |
| 270 ->286          | 0.20150   |           |           |          |
| 270 ->287          | 0.14150   |           |           |          |
| 270 ->288          | -0.18986  |           |           |          |
| 270 ->290          | 0.31450   |           |           |          |
| Excited State 159: | Singlet-A | 3.6472 eV | 339.94 nm | f=0.0008 |
| 270 ->296          | -0.15082  |           |           |          |
| 276 ->296          | -0.15532  |           |           |          |
| 277 ->296          | -0.10506  |           |           |          |
| 278 ->296          | -0.19291  |           |           |          |
| 281 ->296          | -0.27534  |           |           |          |
| 283 ->296          | -0.35880  |           |           |          |
| 285 ->296          | 0.39266   |           |           |          |
| Excited State 160: | Singlet-A | 3.6503 eV | 339.66 nm | f=0.0001 |
| 268 ->292          | -0.10552  |           |           |          |
| 271 ->289          | 0.12357   |           |           |          |
| 271 ->292          | -0.11275  |           |           |          |
| 271 ->293          | 0.25510   |           |           |          |
| 272 ->289          | 0.10715   |           |           |          |
| 272 ->293          | 0.31878   |           |           |          |
| 273 ->293          | -0.17144  |           |           |          |
| 274 ->293          | 0.16459   |           |           |          |
| 275 ->291          | 0.10813   |           |           |          |
| 275 ->292          | 0.13614   |           |           |          |
| 275 ->293          | -0.17898  |           |           |          |
| 276 ->293          | -0.11500  |           |           |          |
| Excited State 161: | Singlet-A | 3.6563 eV | 339.09 nm | f=0.0011 |
| 268 ->289          | -0.14104  |           |           |          |
| 268 ->292          | 0.15613   |           |           |          |
| 268 ->293          | -0.11468  |           |           |          |
| 269 ->289          | 0.25607   |           |           |          |
| 269 ->292          | -0.21727  |           |           |          |
| 269 ->293          | 0.29680   |           |           |          |
| 270 ->286          | -0.10537  |           |           |          |
| 270 ->288          | 0.10252   |           |           |          |
| 270 ->290          | -0.13514  |           |           |          |
| 271 ->293          | 0.15486   |           |           |          |

|                    |           |           |           |          |
|--------------------|-----------|-----------|-----------|----------|
| 275 ->291          | -0.10306  |           |           |          |
| 275 ->293          | 0.21965   |           |           |          |
| Excited State 162: | Singlet-A | 3.6677 eV | 338.04 nm | f=0.0001 |
| 268 ->286          | 0.12867   |           |           |          |
| 268 ->287          | 0.33124   |           |           |          |
| 268 ->288          | -0.11872  |           |           |          |
| 268 ->290          | 0.15135   |           |           |          |
| 268 ->293          | 0.13664   |           |           |          |
| 269 ->286          | -0.16703  |           |           |          |
| 269 ->290          | -0.25882  |           |           |          |
| 269 ->291          | 0.12497   |           |           |          |
| 269 ->293          | -0.18634  |           |           |          |
| 270 ->290          | -0.14202  |           |           |          |
| 272 ->286          | 0.11415   |           |           |          |
| 272 ->290          | 0.14340   |           |           |          |
| Excited State 163: | Singlet-A | 3.6686 eV | 337.96 nm | f=0.0008 |
| 271 ->297          | -0.11093  |           |           |          |
| 276 ->297          | -0.15466  |           |           |          |
| 278 ->297          | 0.14164   |           |           |          |
| 281 ->297          | -0.30932  |           |           |          |
| 282 ->297          | -0.26431  |           |           |          |
| 285 ->297          | 0.48519   |           |           |          |
| Excited State 164: | Singlet-A | 3.6744 eV | 337.42 nm | f=0.0001 |
| 275 ->295          | 0.11646   |           |           |          |
| 277 ->295          | -0.16432  |           |           |          |
| 278 ->295          | 0.11061   |           |           |          |
| 281 ->295          | -0.41206  |           |           |          |
| 282 ->295          | 0.47292   |           |           |          |
| 285 ->295          | -0.14109  |           |           |          |
| Excited State 165: | Singlet-A | 3.6785 eV | 337.05 nm | f=0.0001 |
| 270 ->289          | 0.15889   |           |           |          |
| 270 ->291          | -0.16676  |           |           |          |
| 271 ->289          | -0.17563  |           |           |          |
| 271 ->291          | 0.40599   |           |           |          |
| 271 ->292          | -0.15202  |           |           |          |
| 272 ->291          | -0.11501  |           |           |          |
| 273 ->291          | 0.16855   |           |           |          |
| 274 ->291          | -0.13926  |           |           |          |
| Excited State 166: | Singlet-A | 3.6805 eV | 336.87 nm | f=0.0001 |

|                    |           |           |           |          |
|--------------------|-----------|-----------|-----------|----------|
| 269 ->288          | 0.10449   |           |           |          |
| 269 ->289          | -0.10651  |           |           |          |
| 269 ->291          | -0.19142  |           |           |          |
| 269 ->293          | 0.15990   |           |           |          |
| 270 ->288          | -0.10766  |           |           |          |
| 270 ->289          | 0.25969   |           |           |          |
| 270 ->290          | -0.11720  |           |           |          |
| 270 ->291          | 0.36364   |           |           |          |
| 270 ->292          | -0.17894  |           |           |          |
| 270 ->293          | -0.11601  |           |           |          |
| 271 ->289          | 0.10312   |           |           |          |
| Excited State 167: | Singlet-A | 3.6831 eV | 336.63 nm | f=0.0002 |
| 272 ->294          | -0.30011  |           |           |          |
| 273 ->294          | 0.15243   |           |           |          |
| 274 ->294          | 0.31424   |           |           |          |
| 276 ->294          | -0.20669  |           |           |          |
| 277 ->294          | 0.28831   |           |           |          |
| 278 ->294          | -0.20737  |           |           |          |
| 281 ->294          | 0.24787   |           |           |          |
| Excited State 168: | Singlet-A | 3.6895 eV | 336.05 nm | f=0.0002 |
| 269 ->294          | -0.10773  |           |           |          |
| 274 ->294          | 0.46341   |           |           |          |
| 275 ->294          | 0.35306   |           |           |          |
| 276 ->294          | 0.20885   |           |           |          |
| 277 ->294          | 0.11472   |           |           |          |
| 278 ->294          | 0.10749   |           |           |          |
| 281 ->294          | -0.20839  |           |           |          |
| Excited State 169: | Singlet-A | 3.6945 eV | 335.59 nm | f=0.0006 |
| 268 ->286          | 0.15629   |           |           |          |
| 268 ->287          | -0.31174  |           |           |          |
| 268 ->289          | 0.19537   |           |           |          |
| 268 ->290          | 0.33646   |           |           |          |
| 268 ->292          | 0.20225   |           |           |          |
| 269 ->287          | -0.13951  |           |           |          |
| 269 ->289          | 0.15749   |           |           |          |
| 275 ->290          | 0.12166   |           |           |          |
| Excited State 170: | Singlet-A | 3.6984 eV | 335.24 nm | f=0.0000 |
| 284 ->296          | 0.69652   |           |           |          |
| Excited State 171: | Singlet-A | 3.6989 eV | 335.19 nm | f=0.0001 |

|           |          |
|-----------|----------|
| 268 ->286 | -0.13985 |
| 268 ->288 | 0.12468  |
| 268 ->289 | -0.24836 |
| 268 ->290 | -0.11322 |
| 268 ->292 | 0.10153  |
| 268 ->293 | 0.17971  |
| 269 ->291 | 0.31521  |
| 270 ->291 | 0.19777  |
| 271 ->289 | 0.11776  |
| 272 ->291 | -0.14799 |
| 275 ->289 | -0.14930 |
| 275 ->291 | -0.11772 |

Excited State 172: Singlet-A 3.7090 eV 334.28 nm f=0.0009

|           |          |
|-----------|----------|
| 268 ->289 | 0.18778  |
| 268 ->290 | -0.23407 |
| 268 ->291 | 0.10373  |
| 268 ->292 | 0.25720  |
| 269 ->290 | -0.10439 |
| 269 ->292 | 0.29463  |
| 269 ->293 | 0.19631  |
| 271 ->292 | 0.12836  |
| 271 ->293 | 0.13419  |
| 275 ->292 | -0.19835 |
| 275 ->293 | -0.14352 |

Excited State 173: Singlet-A 3.7248 eV 332.86 nm f=0.0048

|           |          |
|-----------|----------|
| 281 ->299 | 0.10599  |
| 281 ->309 | -0.12096 |
| 281 ->310 | 0.13739  |
| 283 ->309 | -0.22769 |
| 283 ->310 | 0.27554  |
| 285 ->299 | -0.10672 |
| 285 ->305 | -0.12291 |
| 285 ->308 | 0.10303  |
| 285 ->309 | -0.20409 |
| 285 ->310 | 0.24014  |

Excited State 174: Singlet-A 3.7300 eV 332.40 nm f=0.0004

|           |          |
|-----------|----------|
| 268 ->291 | -0.24661 |
| 273 ->295 | 0.39191  |
| 276 ->298 | -0.11777 |
| 277 ->295 | -0.13375 |
| 278 ->295 | 0.12118  |

|                    |           |           |           |          |
|--------------------|-----------|-----------|-----------|----------|
| 281 ->304          | -0.10917  |           |           |          |
| 285 ->304          | 0.12126   |           |           |          |
| Excited State 175: | Singlet-A | 3.7325 eV | 332.18 nm | f=0.0027 |
| 268 ->291          | 0.23494   |           |           |          |
| 272 ->292          | -0.10688  |           |           |          |
| 272 ->293          | -0.10815  |           |           |          |
| 273 ->295          | 0.31117   |           |           |          |
| 274 ->290          | -0.13410  |           |           |          |
| 274 ->291          | 0.11675   |           |           |          |
| 274 ->292          | 0.29779   |           |           |          |
| 274 ->293          | 0.16208   |           |           |          |
| 277 ->295          | -0.10078  |           |           |          |
| Excited State 176: | Singlet-A | 3.7330 eV | 332.13 nm | f=0.0002 |
| 281 ->297          | 0.10183   |           |           |          |
| 282 ->297          | 0.24531   |           |           |          |
| 283 ->297          | 0.57559   |           |           |          |
| 285 ->297          | 0.26212   |           |           |          |
| Excited State 177: | Singlet-A | 3.7339 eV | 332.05 nm | f=0.0061 |
| 272 ->292          | -0.13440  |           |           |          |
| 273 ->295          | -0.28851  |           |           |          |
| 274 ->290          | -0.13437  |           |           |          |
| 274 ->291          | 0.17465   |           |           |          |
| 274 ->292          | 0.32310   |           |           |          |
| 274 ->293          | 0.21008   |           |           |          |
| 278 ->298          | 0.10063   |           |           |          |
| 281 ->304          | -0.10305  |           |           |          |
| 285 ->304          | 0.11314   |           |           |          |
| Excited State 178: | Singlet-A | 3.7356 eV | 331.90 nm | f=0.0075 |
| 268 ->289          | -0.10768  |           |           |          |
| 268 ->291          | 0.29125   |           |           |          |
| 269 ->291          | 0.12198   |           |           |          |
| 274 ->293          | -0.10196  |           |           |          |
| 276 ->303          | -0.10687  |           |           |          |
| 278 ->298          | 0.16778   |           |           |          |
| 281 ->304          | -0.17566  |           |           |          |
| 285 ->299          | -0.10338  |           |           |          |
| 285 ->304          | 0.19364   |           |           |          |
| Excited State 179: | Singlet-A | 3.7402 eV | 331.49 nm | f=0.0002 |
| 276 ->296          | 0.18228   |           |           |          |

|                    |           |           |           |          |
|--------------------|-----------|-----------|-----------|----------|
| 278 ->296          | 0.13868   |           |           |          |
| 281 ->296          | 0.35796   |           |           |          |
| 282 ->296          | 0.43338   |           |           |          |
| 283 ->296          | -0.24174  |           |           |          |
| 285 ->296          | 0.19144   |           |           |          |
| Excited State 180: | Singlet-A | 3.7474 eV | 330.85 nm | f=0.0000 |
| 280 ->294          | 0.70586   |           |           |          |
| Excited State 181: | Singlet-A | 3.7480 eV | 330.80 nm | f=0.0034 |
| 270 ->298          | 0.11679   |           |           |          |
| 277 ->298          | 0.15565   |           |           |          |
| 277 ->303          | 0.13498   |           |           |          |
| 278 ->298          | -0.13826  |           |           |          |
| 278 ->302          | 0.10917   |           |           |          |
| 281 ->299          | 0.12555   |           |           |          |
| 281 ->305          | 0.24653   |           |           |          |
| 283 ->305          | 0.11151   |           |           |          |
| 283 ->310          | -0.10438  |           |           |          |
| 285 ->305          | -0.24509  |           |           |          |
| Excited State 182: | Singlet-A | 3.7508 eV | 330.55 nm | f=0.0523 |
| 273 ->292          | -0.13953  |           |           |          |
| 273 ->295          | 0.11508   |           |           |          |
| 282 ->300          | 0.14452   |           |           |          |
| 283 ->300          | -0.21536  |           |           |          |
| 284 ->298          | 0.23657   |           |           |          |
| 284 ->301          | 0.28119   |           |           |          |
| 284 ->302          | 0.17102   |           |           |          |
| 285 ->300          | 0.24926   |           |           |          |
| Excited State 183: | Singlet-A | 3.7597 eV | 329.77 nm | f=0.0171 |
| 272 ->292          | -0.10975  |           |           |          |
| 272 ->293          | 0.24518   |           |           |          |
| 273 ->289          | 0.16677   |           |           |          |
| 273 ->291          | -0.12694  |           |           |          |
| 273 ->292          | -0.21761  |           |           |          |
| 273 ->293          | 0.48729   |           |           |          |
| Excited State 184: | Singlet-A | 3.7613 eV | 329.63 nm | f=0.0396 |
| 272 ->293          | 0.10267   |           |           |          |
| 272 ->295          | -0.16166  |           |           |          |
| 273 ->293          | 0.15678   |           |           |          |
| 275 ->295          | 0.10835   |           |           |          |



|                    |           |           |           |          |
|--------------------|-----------|-----------|-----------|----------|
| 276 ->303          | 0.10193   |           |           |          |
| 277 ->295          | -0.15295  |           |           |          |
| 277 ->298          | -0.13913  |           |           |          |
| 278 ->303          | 0.16894   |           |           |          |
| 281 ->295          | 0.12434   |           |           |          |
| 285 ->304          | -0.11639  |           |           |          |
| Excited State 185: | Singlet-A | 3.7685 eV | 329.00 nm | f=0.0189 |
| 272 ->295          | 0.28034   |           |           |          |
| 273 ->295          | 0.12678   |           |           |          |
| 274 ->295          | 0.12694   |           |           |          |
| 275 ->295          | -0.21540  |           |           |          |
| 277 ->295          | 0.26867   |           |           |          |
| 277 ->303          | -0.10457  |           |           |          |
| 281 ->295          | -0.21107  |           |           |          |
| 285 ->299          | -0.10771  |           |           |          |
| Excited State 186: | Singlet-A | 3.7734 eV | 328.57 nm | f=0.0052 |
| 268 ->291          | 0.11094   |           |           |          |
| 271 ->298          | 0.10190   |           |           |          |
| 272 ->295          | 0.11270   |           |           |          |
| 276 ->298          | -0.13476  |           |           |          |
| 277 ->295          | 0.13483   |           |           |          |
| 277 ->303          | 0.12453   |           |           |          |
| 281 ->300          | -0.14281  |           |           |          |
| 281 ->306          | -0.14473  |           |           |          |
| 282 ->299          | -0.12194  |           |           |          |
| 283 ->298          | -0.11014  |           |           |          |
| 284 ->311          | 0.11423   |           |           |          |
| 285 ->299          | 0.10335   |           |           |          |
| 285 ->306          | 0.19115   |           |           |          |
| Excited State 187: | Singlet-A | 3.7815 eV | 327.87 nm | f=0.0001 |
| 277 ->297          | -0.14776  |           |           |          |
| 278 ->297          | 0.10239   |           |           |          |
| 281 ->297          | -0.43488  |           |           |          |
| 282 ->297          | 0.46464   |           |           |          |
| 285 ->297          | -0.12957  |           |           |          |
| Excited State 188: | Singlet-A | 3.7856 eV | 327.52 nm | f=0.0113 |
| 277 ->294          | 0.20981   |           |           |          |
| 277 ->303          | -0.11549  |           |           |          |
| 281 ->301          | -0.10628  |           |           |          |
| 282 ->298          | -0.15726  |           |           |          |

|                    |           |           |           |          |
|--------------------|-----------|-----------|-----------|----------|
| 282 ->299          | -0.13863  |           |           |          |
| 282 ->311          | -0.10437  |           |           |          |
| 283 ->301          | 0.12181   |           |           |          |
| 283 ->311          | 0.10691   |           |           |          |
| 284 ->311          | -0.17429  |           |           |          |
| 285 ->299          | 0.16260   |           |           |          |
| 285 ->301          | 0.10489   |           |           |          |
| 285 ->306          | -0.10364  |           |           |          |
| Excited State 189: | Singlet-A | 3.7879 eV | 327.32 nm | f=0.0017 |
| 272 ->294          | 0.13243   |           |           |          |
| 274 ->294          | -0.13801  |           |           |          |
| 276 ->294          | -0.10692  |           |           |          |
| 277 ->294          | 0.32625   |           |           |          |
| 281 ->311          | 0.13645   |           |           |          |
| 282 ->311          | 0.18286   |           |           |          |
| 283 ->311          | -0.18609  |           |           |          |
| 284 ->311          | 0.31466   |           |           |          |
| 285 ->311          | 0.13100   |           |           |          |
| Excited State 190: | Singlet-A | 3.7919 eV | 326.97 nm | f=0.0040 |
| 272 ->294          | 0.14675   |           |           |          |
| 274 ->294          | -0.15332  |           |           |          |
| 275 ->294          | 0.10908   |           |           |          |
| 276 ->294          | -0.11510  |           |           |          |
| 277 ->294          | 0.35969   |           |           |          |
| 277 ->303          | 0.12710   |           |           |          |
| 281 ->306          | -0.13855  |           |           |          |
| 284 ->311          | -0.16364  |           |           |          |
| 285 ->306          | 0.15355   |           |           |          |
| Excited State 191: | Singlet-A | 3.7973 eV | 326.50 nm | f=0.0000 |
| 279 ->295          | 0.70555   |           |           |          |
| Excited State 192: | Singlet-A | 3.8083 eV | 325.56 nm | f=0.0004 |
| 269 ->293          | -0.14731  |           |           |          |
| 270 ->292          | 0.12198   |           |           |          |
| 270 ->293          | -0.23290  |           |           |          |
| 271 ->289          | 0.14434   |           |           |          |
| 271 ->291          | -0.11104  |           |           |          |
| 271 ->292          | -0.21620  |           |           |          |
| 271 ->293          | 0.42739   |           |           |          |
| 273 ->293          | 0.12235   |           |           |          |
| 274 ->293          | -0.13907  |           |           |          |

|                    |           |           |           |          |
|--------------------|-----------|-----------|-----------|----------|
| Excited State 193: | Singlet-A | 3.8121 eV | 325.24 nm | f=0.0000 |
| 270 ->294          | -0.11406  |           |           |          |
| 276 ->294          | -0.44469  |           |           |          |
| 277 ->294          | -0.14500  |           |           |          |
| 278 ->294          | 0.47543   |           |           |          |
| Excited State 194: | Singlet-A | 3.8194 eV | 324.62 nm | f=0.0002 |
| 269 ->292          | -0.16010  |           |           |          |
| 270 ->290          | -0.12774  |           |           |          |
| 270 ->291          | 0.14716   |           |           |          |
| 270 ->292          | 0.30085   |           |           |          |
| 270 ->293          | 0.21526   |           |           |          |
| 271 ->292          | 0.11103   |           |           |          |
| 272 ->296          | -0.15765  |           |           |          |
| 275 ->296          | -0.15389  |           |           |          |
| 276 ->296          | -0.20213  |           |           |          |
| 277 ->296          | 0.13255   |           |           |          |
| 278 ->296          | -0.16710  |           |           |          |
| 281 ->296          | 0.19557   |           |           |          |
| Excited State 195: | Singlet-A | 3.8201 eV | 324.56 nm | f=0.0001 |
| 269 ->292          | -0.13403  |           |           |          |
| 269 ->293          | -0.10056  |           |           |          |
| 270 ->290          | -0.11284  |           |           |          |
| 270 ->291          | 0.13477   |           |           |          |
| 270 ->292          | 0.28183   |           |           |          |
| 270 ->293          | 0.17227   |           |           |          |
| 272 ->296          | 0.19795   |           |           |          |
| 273 ->296          | -0.10481  |           |           |          |
| 275 ->296          | 0.15644   |           |           |          |
| 276 ->296          | 0.23103   |           |           |          |
| 277 ->296          | -0.18192  |           |           |          |
| 278 ->296          | 0.19750   |           |           |          |
| 281 ->296          | -0.22217  |           |           |          |
| Excited State 196: | Singlet-A | 3.8266 eV | 324.01 nm | f=0.0036 |
| 272 ->299          | -0.14506  |           |           |          |
| 274 ->296          | -0.19184  |           |           |          |
| 274 ->298          | 0.12654   |           |           |          |
| 274 ->299          | 0.25190   |           |           |          |
| 277 ->296          | -0.11653  |           |           |          |
| 283 ->304          | -0.11402  |           |           |          |
| 285 ->304          | -0.13210  |           |           |          |

|                    |           |           |           |          |
|--------------------|-----------|-----------|-----------|----------|
| Excited State 197: | Singlet-A | 3.8287 eV | 323.83 nm | f=0.0030 |
| 272 ->300          | -0.10822  |           |           |          |
| 273 ->295          | -0.11462  |           |           |          |
| 273 ->300          | -0.24410  |           |           |          |
| 274 ->295          | 0.10706   |           |           |          |
| 274 ->296          | 0.10869   |           |           |          |
| 275 ->295          | -0.18425  |           |           |          |
| 276 ->295          | 0.33486   |           |           |          |
| 277 ->295          | -0.30199  |           |           |          |
| Excited State 198: | Singlet-A | 3.8319 eV | 323.55 nm | f=0.0017 |
| 272 ->300          | 0.14422   |           |           |          |
| 273 ->300          | 0.34181   |           |           |          |
| 275 ->295          | -0.16641  |           |           |          |
| 276 ->295          | 0.28419   |           |           |          |
| 277 ->295          | -0.20066  |           |           |          |
| 284 ->306          | 0.11361   |           |           |          |
| 284 ->308          | -0.11145  |           |           |          |
| Excited State 199: | Singlet-A | 3.8354 eV | 323.26 nm | f=0.0007 |
| 274 ->296          | 0.45964   |           |           |          |
| 275 ->296          | 0.26083   |           |           |          |
| 276 ->296          | 0.10228   |           |           |          |
| 277 ->296          | 0.22108   |           |           |          |
| Excited State 200: | Singlet-A | 3.8433 eV | 322.60 nm | f=0.0122 |
| 272 ->301          | -0.11717  |           |           |          |
| 273 ->302          | -0.11330  |           |           |          |
| 274 ->296          | -0.11264  |           |           |          |
| 274 ->298          | -0.11377  |           |           |          |
| 274 ->299          | 0.14678   |           |           |          |
| 274 ->301          | 0.20821   |           |           |          |
| 274 ->302          | -0.17715  |           |           |          |
| 282 ->304          | -0.14636  |           |           |          |
| 282 ->309          | -0.13563  |           |           |          |
| 285 ->304          | 0.12608   |           |           |          |
| Excited State 201: | Singlet-A | 3.8439 eV | 322.55 nm | f=0.0013 |
| 268 ->292          | -0.11004  |           |           |          |
| 273 ->298          | 0.13956   |           |           |          |
| 273 ->301          | 0.22410   |           |           |          |
| 273 ->302          | 0.14012   |           |           |          |
| 274 ->299          | 0.15076   |           |           |          |

|                    |           |           |           |          |
|--------------------|-----------|-----------|-----------|----------|
| 278 ->295          | -0.10795  |           |           |          |
| 281 ->299          | -0.11299  |           |           |          |
| Excited State 202: | Singlet-A | 3.8482 eV | 322.19 nm | f=0.0184 |
| 273 ->301          | 0.14528   |           |           |          |
| 274 ->296          | -0.10242  |           |           |          |
| 274 ->299          | -0.18394  |           |           |          |
| 276 ->299          | -0.10882  |           |           |          |
| 277 ->298          | -0.14135  |           |           |          |
| 278 ->299          | -0.11801  |           |           |          |
| 281 ->299          | 0.21381   |           |           |          |
| 285 ->309          | 0.11541   |           |           |          |
| Excited State 203: | Singlet-A | 3.8497 eV | 322.06 nm | f=0.0003 |
| 270 ->295          | -0.10413  |           |           |          |
| 276 ->295          | 0.26465   |           |           |          |
| 277 ->295          | 0.30616   |           |           |          |
| 278 ->295          | 0.50115   |           |           |          |
| Excited State 204: | Singlet-A | 3.8535 eV | 321.74 nm | f=0.0035 |
| 268 ->290          | -0.12027  |           |           |          |
| 268 ->291          | 0.17842   |           |           |          |
| 268 ->292          | 0.28112   |           |           |          |
| 268 ->293          | 0.13443   |           |           |          |
| 269 ->292          | -0.16848  |           |           |          |
| 269 ->293          | -0.13867  |           |           |          |
| 272 ->292          | 0.11963   |           |           |          |
| 273 ->297          | -0.11579  |           |           |          |
| 276 ->298          | -0.11448  |           |           |          |
| 281 ->300          | 0.14609   |           |           |          |
| Excited State 205: | Singlet-A | 3.8581 eV | 321.36 nm | f=0.0019 |
| 268 ->292          | -0.18040  |           |           |          |
| 269 ->292          | 0.10553   |           |           |          |
| 273 ->297          | -0.21337  |           |           |          |
| 273 ->301          | -0.10375  |           |           |          |
| 275 ->300          | -0.11183  |           |           |          |
| 277 ->297          | 0.14767   |           |           |          |
| 277 ->300          | 0.10341   |           |           |          |
| 278 ->297          | -0.11076  |           |           |          |
| 281 ->300          | 0.23937   |           |           |          |
| 282 ->300          | 0.14231   |           |           |          |
| Excited State 206: | Singlet-A | 3.8607 eV | 321.15 nm | f=0.0008 |

|                    |           |           |           |          |
|--------------------|-----------|-----------|-----------|----------|
| 273 ->297          | 0.42406   |           |           |          |
| 275 ->297          | 0.12598   |           |           |          |
| 276 ->298          | -0.10152  |           |           |          |
| 277 ->297          | -0.25663  |           |           |          |
| 278 ->297          | 0.17794   |           |           |          |
| 281 ->297          | 0.15462   |           |           |          |
| 281 ->300          | 0.18116   |           |           |          |
| Excited State 207: | Singlet-A | 3.8667 eV | 320.65 nm | f=0.0265 |
| 276 ->298          | -0.14383  |           |           |          |
| 279 ->310          | 0.12320   |           |           |          |
| 281 ->302          | -0.11122  |           |           |          |
| 281 ->310          | -0.10914  |           |           |          |
| 282 ->309          | -0.18814  |           |           |          |
| 282 ->310          | 0.19245   |           |           |          |
| 283 ->310          | 0.10572   |           |           |          |
| 283 ->312          | 0.10253   |           |           |          |
| 285 ->312          | 0.11896   |           |           |          |
| Excited State 208: | Singlet-A | 3.8689 eV | 320.46 nm | f=0.0000 |
| 280 ->296          | 0.70688   |           |           |          |
| Excited State 209: | Singlet-A | 3.8713 eV | 320.27 nm | f=0.0019 |
| 279 ->309          | -0.14413  |           |           |          |
| 279 ->310          | 0.18371   |           |           |          |
| 281 ->299          | 0.13760   |           |           |          |
| 281 ->301          | 0.12264   |           |           |          |
| 281 ->303          | -0.10214  |           |           |          |
| 281 ->304          | -0.12881  |           |           |          |
| 282 ->310          | 0.13282   |           |           |          |
| 283 ->312          | 0.10829   |           |           |          |
| 285 ->304          | 0.10540   |           |           |          |
| 285 ->312          | 0.12465   |           |           |          |
| Excited State 210: | Singlet-A | 3.8764 eV | 319.84 nm | f=0.0014 |
| 270 ->294          | 0.20227   |           |           |          |
| 275 ->294          | 0.19675   |           |           |          |
| 276 ->294          | -0.15973  |           |           |          |
| 279 ->309          | 0.14476   |           |           |          |
| 279 ->310          | -0.17686  |           |           |          |
| 281 ->301          | 0.10900   |           |           |          |
| 282 ->310          | 0.14853   |           |           |          |
| 283 ->312          | -0.12077  |           |           |          |
| 285 ->314          | 0.11214   |           |           |          |

|                    |           |           |           |          |
|--------------------|-----------|-----------|-----------|----------|
| Excited State 211: | Singlet-A | 3.8809 eV | 319.47 nm | f=0.0044 |
| 268 ->293          | 0.17264   |           |           |          |
| 277 ->298          | 0.11266   |           |           |          |
| 278 ->299          | -0.13741  |           |           |          |
| 278 ->305          | -0.13486  |           |           |          |
| 279 ->310          | -0.10537  |           |           |          |
| 281 ->302          | 0.13414   |           |           |          |
| 281 ->307          | 0.13070   |           |           |          |
| 284 ->311          | -0.12360  |           |           |          |
| 285 ->307          | -0.12586  |           |           |          |
| Excited State 212: | Singlet-A | 3.8836 eV | 319.25 nm | f=0.0302 |
| 268 ->293          | 0.13471   |           |           |          |
| 276 ->300          | -0.10129  |           |           |          |
| 277 ->299          | -0.10537  |           |           |          |
| 277 ->300          | -0.11462  |           |           |          |
| 278 ->300          | 0.13580   |           |           |          |
| 278 ->305          | 0.10716   |           |           |          |
| 281 ->301          | 0.10368   |           |           |          |
| 282 ->311          | 0.11240   |           |           |          |
| 283 ->311          | -0.11481  |           |           |          |
| 284 ->311          | -0.14160  |           |           |          |
| 285 ->311          | 0.13412   |           |           |          |
| Excited State 213: | Singlet-A | 3.8838 eV | 319.23 nm | f=0.0049 |
| 268 ->289          | 0.17304   |           |           |          |
| 268 ->291          | -0.10676  |           |           |          |
| 268 ->292          | -0.19254  |           |           |          |
| 268 ->293          | 0.44607   |           |           |          |
| 269 ->293          | 0.15568   |           |           |          |
| Excited State 214: | Singlet-A | 3.8937 eV | 318.42 nm | f=0.0010 |
| 272 ->297          | 0.36042   |           |           |          |
| 273 ->297          | 0.33967   |           |           |          |
| 274 ->297          | 0.11556   |           |           |          |
| 275 ->297          | -0.19674  |           |           |          |
| 277 ->297          | 0.30219   |           |           |          |
| 281 ->297          | -0.19414  |           |           |          |
| Excited State 215: | Singlet-A | 3.8984 eV | 318.04 nm | f=0.0022 |
| 267 ->294          | -0.10246  |           |           |          |
| 269 ->294          | -0.10662  |           |           |          |
| 270 ->294          | 0.26146   |           |           |          |

|                    |           |           |           |          |
|--------------------|-----------|-----------|-----------|----------|
| 275 ->294          | 0.14001   |           |           |          |
| 276 ->294          | -0.11810  |           |           |          |
| 277 ->304          | -0.12394  |           |           |          |
| 277 ->306          | 0.11867   |           |           |          |
| 278 ->304          | -0.13535  |           |           |          |
| 278 ->306          | 0.13527   |           |           |          |
| 283 ->304          | -0.10496  |           |           |          |
| Excited State 216: | Singlet-A | 3.9012 eV | 317.81 nm | f=0.0000 |
| 279 ->297          | 0.69963   |           |           |          |
| Excited State 217: | Singlet-A | 3.9030 eV | 317.66 nm | f=0.0252 |
| 270 ->294          | 0.19243   |           |           |          |
| 276 ->300          | -0.11726  |           |           |          |
| 277 ->299          | 0.14613   |           |           |          |
| 277 ->304          | 0.12809   |           |           |          |
| 278 ->304          | 0.11663   |           |           |          |
| 278 ->305          | -0.12040  |           |           |          |
| 279 ->310          | 0.10948   |           |           |          |
| Excited State 218: | Singlet-A | 3.9054 eV | 317.47 nm | f=0.0003 |
| 271 ->304          | -0.12134  |           |           |          |
| 276 ->304          | 0.20158   |           |           |          |
| 277 ->306          | -0.10791  |           |           |          |
| 278 ->299          | 0.10530   |           |           |          |
| 278 ->300          | -0.14885  |           |           |          |
| 278 ->308          | -0.10547  |           |           |          |
| 281 ->300          | -0.14061  |           |           |          |
| 282 ->304          | 0.10451   |           |           |          |
| Excited State 219: | Singlet-A | 3.9107 eV | 317.04 nm | f=0.0025 |
| 275 ->295          | -0.10427  |           |           |          |
| 276 ->299          | -0.12712  |           |           |          |
| 278 ->306          | -0.11156  |           |           |          |
| 280 ->300          | -0.16626  |           |           |          |
| 280 ->311          | 0.18241   |           |           |          |
| 281 ->299          | -0.12294  |           |           |          |
| 281 ->301          | -0.12847  |           |           |          |
| Excited State 220: | Singlet-A | 3.9145 eV | 316.73 nm | f=0.0143 |
| 275 ->295          | -0.10236  |           |           |          |
| 277 ->299          | 0.10232   |           |           |          |
| 277 ->305          | 0.10850   |           |           |          |
| 277 ->306          | 0.11133   |           |           |          |



|                    |           |           |           |          |
|--------------------|-----------|-----------|-----------|----------|
| 278 ->306          | 0.11184   |           |           |          |
| 280 ->300          | -0.10328  |           |           |          |
| 280 ->301          | 0.12920   |           |           |          |
| 280 ->311          | 0.22995   |           |           |          |
| 281 ->302          | -0.10132  |           |           |          |
| 282 ->311          | 0.11737   |           |           |          |
| 282 ->313          | 0.10002   |           |           |          |
| 283 ->311          | -0.11439  |           |           |          |
| 284 ->311          | -0.15151  |           |           |          |
| 284 ->313          | 0.13848   |           |           |          |
| 285 ->311          | 0.12784   |           |           |          |
| Excited State 221: | Singlet-A | 3.9202 eV | 316.27 nm | f=0.0001 |
| 270 ->296          | -0.10871  |           |           |          |
| 271 ->296          | -0.10119  |           |           |          |
| 272 ->296          | 0.24183   |           |           |          |
| 273 ->296          | -0.10084  |           |           |          |
| 274 ->296          | -0.26042  |           |           |          |
| 275 ->296          | 0.16079   |           |           |          |
| 276 ->296          | -0.17410  |           |           |          |
| 277 ->296          | 0.49941   |           |           |          |
| Excited State 222: | Singlet-A | 3.9230 eV | 316.05 nm | f=0.0025 |
| 276 ->299          | -0.10084  |           |           |          |
| 276 ->305          | -0.12137  |           |           |          |
| 280 ->300          | 0.23038   |           |           |          |
| 284 ->299          | -0.10580  |           |           |          |
| 284 ->305          | -0.12659  |           |           |          |
| 284 ->313          | -0.11600  |           |           |          |
| 285 ->304          | 0.11297   |           |           |          |
| 285 ->306          | -0.13350  |           |           |          |
| Excited State 223: | Singlet-A | 3.9297 eV | 315.51 nm | f=0.0011 |
| 276 ->300          | 0.10872   |           |           |          |
| 276 ->303          | 0.15256   |           |           |          |
| 276 ->304          | 0.13606   |           |           |          |
| 277 ->298          | -0.10409  |           |           |          |
| 277 ->304          | 0.12547   |           |           |          |
| 278 ->304          | -0.14468  |           |           |          |
| 278 ->308          | -0.12293  |           |           |          |
| 280 ->300          | 0.14089   |           |           |          |
| 281 ->305          | 0.10795   |           |           |          |
| 284 ->304          | 0.14000   |           |           |          |
| 285 ->305          | -0.13039  |           |           |          |

|                    |           |           |           |          |
|--------------------|-----------|-----------|-----------|----------|
| Excited State 224: | Singlet-A | 3.9314 eV | 315.37 nm | f=0.0071 |
| 266 ->295          | -0.12433  |           |           |          |
| 269 ->295          | -0.10553  |           |           |          |
| 270 ->295          | -0.13792  |           |           |          |
| 271 ->295          | 0.24844   |           |           |          |
| 275 ->295          | -0.13485  |           |           |          |
| 276 ->295          | -0.12832  |           |           |          |
| 277 ->295          | -0.11055  |           |           |          |
| 280 ->301          | -0.12381  |           |           |          |
| 280 ->311          | -0.12512  |           |           |          |
| 281 ->301          | 0.11121   |           |           |          |
| 285 ->313          | -0.10401  |           |           |          |

|                    |           |           |           |          |
|--------------------|-----------|-----------|-----------|----------|
| Excited State 225: | Singlet-A | 3.9340 eV | 315.16 nm | f=0.0032 |
| 274 ->299          | 0.11393   |           |           |          |
| 276 ->296          | -0.10053  |           |           |          |
| 276 ->304          | 0.11108   |           |           |          |
| 277 ->296          | -0.10846  |           |           |          |
| 278 ->296          | 0.11838   |           |           |          |
| 278 ->304          | 0.14881   |           |           |          |
| 281 ->301          | -0.12188  |           |           |          |
| 282 ->304          | 0.13362   |           |           |          |
| 282 ->310          | 0.14332   |           |           |          |
| 283 ->304          | 0.15127   |           |           |          |
| 283 ->314          | 0.12645   |           |           |          |

|                    |           |           |           |          |
|--------------------|-----------|-----------|-----------|----------|
| Excited State 226: | Singlet-A | 3.9367 eV | 314.95 nm | f=0.0002 |
| 270 ->296          | -0.10019  |           |           |          |
| 276 ->296          | -0.43749  |           |           |          |
| 277 ->296          | -0.12484  |           |           |          |
| 278 ->296          | 0.45115   |           |           |          |

|                    |           |           |           |          |
|--------------------|-----------|-----------|-----------|----------|
| Excited State 227: | Singlet-A | 3.9397 eV | 314.70 nm | f=0.0033 |
| 271 ->295          | 0.13143   |           |           |          |
| 275 ->295          | -0.12561  |           |           |          |
| 280 ->298          | 0.15908   |           |           |          |
| 280 ->300          | 0.35926   |           |           |          |
| 280 ->301          | 0.19170   |           |           |          |
| 280 ->302          | 0.15161   |           |           |          |
| 280 ->311          | 0.12739   |           |           |          |
| 280 ->315          | 0.17999   |           |           |          |
| 284 ->311          | 0.10053   |           |           |          |

|                    |           |           |           |          |
|--------------------|-----------|-----------|-----------|----------|
| Excited State 228: | Singlet-A | 3.9425 eV | 314.48 nm | f=0.0006 |
| 272 ->297          | 0.10896   |           |           |          |
| 274 ->297          | 0.14964   |           |           |          |
| 275 ->297          | -0.26226  |           |           |          |
| 276 ->297          | 0.45998   |           |           |          |
| 277 ->297          | -0.30955  |           |           |          |
| Excited State 229: | Singlet-A | 3.9440 eV | 314.36 nm | f=0.0035 |
| 270 ->295          | -0.11016  |           |           |          |
| 271 ->295          | 0.19348   |           |           |          |
| 275 ->295          | -0.11542  |           |           |          |
| 280 ->300          | 0.13955   |           |           |          |
| 280 ->311          | -0.11062  |           |           |          |
| 281 ->301          | -0.18063  |           |           |          |
| 282 ->298          | -0.16337  |           |           |          |
| 283 ->298          | 0.18207   |           |           |          |
| Excited State 230: | Singlet-A | 3.9445 eV | 314.32 nm | f=0.0006 |
| 270 ->294          | 0.12265   |           |           |          |
| 275 ->294          | 0.13497   |           |           |          |
| 276 ->296          | -0.10072  |           |           |          |
| 279 ->299          | 0.18499   |           |           |          |
| 279 ->312          | 0.21088   |           |           |          |
| 281 ->298          | -0.10549  |           |           |          |
| 281 ->299          | 0.13063   |           |           |          |
| 281 ->301          | 0.11043   |           |           |          |
| 281 ->302          | -0.13969  |           |           |          |
| 282 ->312          | 0.17956   |           |           |          |
| 283 ->312          | 0.24886   |           |           |          |
| 285 ->312          | 0.10464   |           |           |          |
| Excited State 231: | Singlet-A | 3.9492 eV | 313.95 nm | f=0.0023 |
| 276 ->297          | -0.12898  |           |           |          |
| 281 ->298          | -0.12073  |           |           |          |
| 281 ->300          | -0.12437  |           |           |          |
| 281 ->301          | 0.16149   |           |           |          |
| 281 ->305          | 0.13168   |           |           |          |
| 282 ->304          | 0.10593   |           |           |          |
| 282 ->309          | 0.10455   |           |           |          |
| 284 ->307          | -0.10727  |           |           |          |
| 284 ->313          | -0.10603  |           |           |          |
| 285 ->306          | -0.10494  |           |           |          |
| Excited State 232: | Singlet-A | 3.9562 eV | 313.39 nm | f=0.0005 |

|                    |           |           |           |          |
|--------------------|-----------|-----------|-----------|----------|
| 270 ->297          | -0.10153  |           |           |          |
| 276 ->297          | 0.24512   |           |           |          |
| 277 ->297          | 0.33202   |           |           |          |
| 278 ->297          | 0.50817   |           |           |          |
| Excited State 233: | Singlet-A | 3.9604 eV | 313.06 nm | f=0.0084 |
| 276 ->299          | 0.10234   |           |           |          |
| 277 ->306          | 0.10775   |           |           |          |
| 278 ->298          | 0.11042   |           |           |          |
| 278 ->299          | 0.11359   |           |           |          |
| 279 ->299          | 0.14377   |           |           |          |
| 281 ->298          | 0.11955   |           |           |          |
| 281 ->302          | 0.13561   |           |           |          |
| 281 ->303          | 0.10318   |           |           |          |
| 282 ->309          | -0.13800  |           |           |          |
| 283 ->299          | -0.12848  |           |           |          |
| 285 ->302          | -0.10742  |           |           |          |
| Excited State 234: | Singlet-A | 3.9701 eV | 312.30 nm | f=0.0022 |
| 277 ->298          | -0.12065  |           |           |          |
| 277 ->301          | 0.10179   |           |           |          |
| 277 ->306          | -0.14810  |           |           |          |
| 281 ->302          | 0.10388   |           |           |          |
| 283 ->304          | -0.11735  |           |           |          |
| 284 ->298          | 0.14333   |           |           |          |
| 284 ->313          | 0.16253   |           |           |          |
| 285 ->306          | -0.14804  |           |           |          |
| Excited State 235: | Singlet-A | 3.9765 eV | 311.79 nm | f=0.0022 |
| 278 ->299          | -0.10474  |           |           |          |
| 278 ->301          | 0.10174   |           |           |          |
| 278 ->302          | -0.10884  |           |           |          |
| 279 ->299          | 0.36295   |           |           |          |
| 282 ->314          | -0.10823  |           |           |          |
| 283 ->312          | -0.12643  |           |           |          |
| Excited State 236: | Singlet-A | 3.9770 eV | 311.75 nm | f=0.0135 |
| 277 ->301          | -0.11162  |           |           |          |
| 280 ->300          | 0.11403   |           |           |          |
| 280 ->301          | -0.10846  |           |           |          |
| 281 ->298          | -0.11547  |           |           |          |
| 283 ->298          | 0.11694   |           |           |          |
| 284 ->298          | 0.19364   |           |           |          |
| 284 ->302          | -0.10362  |           |           |          |

|                    |           |           |           |          |
|--------------------|-----------|-----------|-----------|----------|
| 284 ->313          | 0.25165   |           |           |          |
| 285 ->306          | 0.10804   |           |           |          |
| Excited State 237: | Singlet-A | 3.9785 eV | 311.64 nm | f=0.0009 |
| 273 ->301          | -0.10511  |           |           |          |
| 276 ->306          | -0.12299  |           |           |          |
| 277 ->304          | 0.10718   |           |           |          |
| 277 ->305          | -0.10056  |           |           |          |
| 277 ->306          | 0.16147   |           |           |          |
| 280 ->301          | 0.11394   |           |           |          |
| 284 ->313          | 0.16678   |           |           |          |
| Excited State 238: | Singlet-A | 3.9823 eV | 311.34 nm | f=0.0015 |
| 273 ->300          | -0.12455  |           |           |          |
| 275 ->298          | 0.11830   |           |           |          |
| 276 ->301          | -0.12887  |           |           |          |
| 277 ->304          | 0.10921   |           |           |          |
| 278 ->302          | 0.10682   |           |           |          |
| 281 ->298          | 0.10770   |           |           |          |
| 283 ->298          | -0.10908  |           |           |          |
| 284 ->306          | 0.15016   |           |           |          |
| 284 ->307          | -0.12227  |           |           |          |
| 284 ->308          | -0.10559  |           |           |          |
| 284 ->313          | 0.13838   |           |           |          |
| Excited State 239: | Singlet-A | 3.9874 eV | 310.94 nm | f=0.0102 |
| 265 ->286          | 0.10355   |           |           |          |
| 278 ->298          | -0.11618  |           |           |          |
| 280 ->298          | -0.12538  |           |           |          |
| 280 ->300          | 0.12902   |           |           |          |
| 280 ->301          | -0.16098  |           |           |          |
| 281 ->300          | -0.10391  |           |           |          |
| 282 ->306          | 0.11762   |           |           |          |
| 284 ->313          | 0.16686   |           |           |          |
| Excited State 240: | Singlet-A | 3.9903 eV | 310.71 nm | f=0.0045 |
| 276 ->298          | -0.12695  |           |           |          |
| 276 ->302          | -0.14585  |           |           |          |
| 278 ->301          | 0.23690   |           |           |          |
| 279 ->299          | -0.21732  |           |           |          |
| 283 ->298          | 0.15536   |           |           |          |
| 284 ->298          | 0.15488   |           |           |          |
| 284 ->313          | -0.16791  |           |           |          |

Excited State 241: Singlet-A 3.9931 eV 310.49 nm f=0.0161  
276 ->301 -0.12991  
277 ->305 -0.12940  
278 ->302 0.11315  
279 ->299 0.20064  
284 ->298 0.15578  
284 ->313 -0.11873  
285 ->307 -0.12729

Excited State 242: Singlet-A 3.9995 eV 310.00 nm f=0.0150  
275 ->294 -0.12638  
276 ->299 0.10052  
276 ->304 -0.10040  
278 ->299 0.14026  
279 ->299 0.10755  
279 ->310 -0.10549  
279 ->312 0.16566  
279 ->314 -0.16246  
282 ->312 0.10355  
282 ->314 0.12872  
283 ->299 -0.11748  
283 ->314 0.12601

Excited State 243: Singlet-A 4.0012 eV 309.87 nm f=0.0068  
271 ->294 0.10513  
272 ->294 0.24334  
273 ->294 -0.16274  
274 ->294 0.18693  
275 ->294 -0.24409  
276 ->301 0.10601  
277 ->305 0.11940  
279 ->299 0.11658  
284 ->298 -0.10301

Excited State 244: Singlet-A 4.0041 eV 309.64 nm f=0.0192  
275 ->298 0.10109  
281 ->301 -0.11631  
281 ->304 -0.11127  
282 ->298 0.19151  
282 ->302 -0.16453  
282 ->304 0.10841  
282 ->310 0.12221  
283 ->298 -0.16105  
283 ->299 -0.12312

|                    |           |           |           |          |
|--------------------|-----------|-----------|-----------|----------|
| 283 ->302          | 0.10115   |           |           |          |
| 285 ->308          | 0.13649   |           |           |          |
| Excited State 245: | Singlet-A | 4.0050 eV | 309.57 nm | f=0.0012 |
| 273 ->300          | -0.11646  |           |           |          |
| 276 ->300          | -0.16975  |           |           |          |
| 276 ->301          | 0.12272   |           |           |          |
| 278 ->300          | 0.13733   |           |           |          |
| 278 ->301          | -0.15000  |           |           |          |
| 280 ->311          | 0.13915   |           |           |          |
| 284 ->300          | 0.17084   |           |           |          |
| 284 ->311          | 0.10669   |           |           |          |
| Excited State 246: | Singlet-A | 4.0095 eV | 309.22 nm | f=0.0021 |
| 270 ->294          | 0.12330   |           |           |          |
| 271 ->294          | 0.13500   |           |           |          |
| 272 ->294          | 0.21078   |           |           |          |
| 273 ->294          | -0.17100  |           |           |          |
| 274 ->294          | 0.14094   |           |           |          |
| 275 ->294          | -0.17012  |           |           |          |
| 279 ->298          | -0.18900  |           |           |          |
| 279 ->301          | 0.17224   |           |           |          |
| 279 ->302          | -0.13769  |           |           |          |
| 279 ->314          | 0.12215   |           |           |          |
| 282 ->314          | -0.11983  |           |           |          |
| 283 ->314          | -0.15027  |           |           |          |
| Excited State 247: | Singlet-A | 4.0119 eV | 309.04 nm | f=0.0273 |
| 276 ->305          | 0.11429   |           |           |          |
| 277 ->305          | -0.11541  |           |           |          |
| 281 ->307          | 0.12719   |           |           |          |
| 282 ->298          | 0.22556   |           |           |          |
| 282 ->302          | -0.12263  |           |           |          |
| 282 ->305          | 0.10420   |           |           |          |
| 283 ->298          | 0.14741   |           |           |          |
| 285 ->307          | -0.15979  |           |           |          |
| Excited State 248: | Singlet-A | 4.0163 eV | 308.70 nm | f=0.0074 |
| 265 ->286          | 0.21250   |           |           |          |
| 273 ->300          | -0.13509  |           |           |          |
| 280 ->298          | 0.14873   |           |           |          |
| 280 ->300          | -0.17654  |           |           |          |
| 280 ->301          | 0.19216   |           |           |          |
| 280 ->302          | 0.10147   |           |           |          |

|                    |           |           |           |          |
|--------------------|-----------|-----------|-----------|----------|
| 280 ->311          | -0.16945  |           |           |          |
| 284 ->298          | -0.14858  |           |           |          |
| 284 ->315          | 0.19751   |           |           |          |
| Excited State 249: | Singlet-A | 4.0223 eV | 308.24 nm | f=0.0044 |
| 256 ->286          | 0.13607   |           |           |          |
| 259 ->287          | -0.12943  |           |           |          |
| 264 ->287          | -0.11848  |           |           |          |
| 265 ->286          | -0.15262  |           |           |          |
| 266 ->286          | 0.21601   |           |           |          |
| 267 ->287          | 0.24801   |           |           |          |
| 282 ->298          | -0.11781  |           |           |          |
| Excited State 250: | Singlet-A | 4.0273 eV | 307.86 nm | f=0.0045 |
| 256 ->287          | -0.13323  |           |           |          |
| 259 ->286          | 0.11711   |           |           |          |
| 265 ->286          | 0.13615   |           |           |          |
| 266 ->286          | -0.10027  |           |           |          |
| 266 ->287          | -0.19713  |           |           |          |
| 267 ->286          | -0.18318  |           |           |          |
| 267 ->287          | 0.22090   |           |           |          |
| 283 ->298          | -0.10603  |           |           |          |
| Excited State 251: | Singlet-A | 4.0290 eV | 307.73 nm | f=0.0050 |
| 270 ->296          | -0.24331  |           |           |          |
| 275 ->296          | -0.20552  |           |           |          |
| 276 ->296          | 0.11882   |           |           |          |
| 279 ->298          | -0.26034  |           |           |          |
| 279 ->301          | 0.26545   |           |           |          |
| 279 ->302          | -0.19574  |           |           |          |
| 279 ->310          | 0.10132   |           |           |          |
| 283 ->298          | 0.10891   |           |           |          |
| Excited State 252: | Singlet-A | 4.0320 eV | 307.50 nm | f=0.0059 |
| 275 ->295          | -0.10266  |           |           |          |
| 279 ->312          | -0.11022  |           |           |          |
| 281 ->298          | 0.22081   |           |           |          |
| 281 ->302          | -0.19507  |           |           |          |
| 283 ->301          | 0.13454   |           |           |          |
| 285 ->298          | 0.33899   |           |           |          |
| Excited State 253: | Singlet-A | 4.0335 eV | 307.39 nm | f=0.0029 |
| 258 ->286          | 0.16089   |           |           |          |
| 260 ->286          | -0.12621  |           |           |          |



|                    |           |           |           |          |
|--------------------|-----------|-----------|-----------|----------|
| 265 ->286          | 0.35282   |           |           |          |
| 265 ->287          | 0.16978   |           |           |          |
| 266 ->286          | 0.22244   |           |           |          |
| 267 ->286          | 0.13913   |           |           |          |
| Excited State 254: | Singlet-A | 4.0371 eV | 307.11 nm | f=0.0013 |
| 264 ->286          | -0.12707  |           |           |          |
| 264 ->287          | 0.28576   |           |           |          |
| 267 ->287          | 0.12055   |           |           |          |
| 270 ->296          | 0.12101   |           |           |          |
| 279 ->310          | -0.12663  |           |           |          |
| 279 ->312          | 0.13466   |           |           |          |
| 279 ->314          | -0.16170  |           |           |          |
| 282 ->312          | -0.16124  |           |           |          |
| 283 ->314          | -0.14276  |           |           |          |
| Excited State 255: | Singlet-A | 4.0374 eV | 307.09 nm | f=0.0244 |
| 267 ->287          | -0.10188  |           |           |          |
| 270 ->296          | -0.19410  |           |           |          |
| 275 ->296          | -0.14528  |           |           |          |
| 279 ->299          | -0.13095  |           |           |          |
| 279 ->312          | 0.26083   |           |           |          |
| 282 ->298          | -0.15776  |           |           |          |
| 282 ->302          | 0.12303   |           |           |          |
| Excited State 256: | Singlet-A | 4.0401 eV | 306.88 nm | f=0.0002 |
| 266 ->286          | -0.16098  |           |           |          |
| 271 ->295          | 0.14863   |           |           |          |
| 271 ->297          | -0.10267  |           |           |          |
| 272 ->295          | 0.21175   |           |           |          |
| 273 ->295          | -0.11506  |           |           |          |
| 275 ->295          | 0.23691   |           |           |          |
| 280 ->311          | -0.10199  |           |           |          |
| 280 ->315          | -0.10378  |           |           |          |
| 284 ->298          | 0.10964   |           |           |          |
| 284 ->315          | -0.16099  |           |           |          |
| 285 ->298          | 0.12544   |           |           |          |
| Excited State 257: | Singlet-A | 4.0425 eV | 306.70 nm | f=0.0033 |
| 264 ->286          | -0.14760  |           |           |          |
| 264 ->287          | 0.32370   |           |           |          |
| 279 ->312          | -0.15306  |           |           |          |
| 279 ->314          | 0.13744   |           |           |          |
| 281 ->312          | -0.10828  |           |           |          |

|                    |           |           |           |          |
|--------------------|-----------|-----------|-----------|----------|
| 282 ->312          | 0.16681   |           |           |          |
| 283 ->314          | 0.11862   |           |           |          |
| 285 ->298          | -0.10550  |           |           |          |
| Excited State 258: | Singlet-A | 4.0457 eV | 306.46 nm | f=0.0007 |
| 271 ->295          | 0.21296   |           |           |          |
| 271 ->297          | 0.17754   |           |           |          |
| 272 ->295          | 0.29841   |           |           |          |
| 273 ->295          | -0.15185  |           |           |          |
| 274 ->295          | 0.12382   |           |           |          |
| 275 ->295          | 0.25180   |           |           |          |
| 275 ->297          | -0.13802  |           |           |          |
| 280 ->311          | 0.12630   |           |           |          |
| 284 ->315          | 0.13626   |           |           |          |
| Excited State 259: | Singlet-A | 4.0465 eV | 306.40 nm | f=0.0050 |
| 267 ->287          | -0.11580  |           |           |          |
| 267 ->294          | -0.13506  |           |           |          |
| 269 ->294          | -0.12626  |           |           |          |
| 270 ->296          | 0.22007   |           |           |          |
| 271 ->294          | -0.12165  |           |           |          |
| 273 ->294          | 0.21975   |           |           |          |
| 275 ->296          | 0.13165   |           |           |          |
| 279 ->298          | -0.10551  |           |           |          |
| 279 ->299          | 0.17297   |           |           |          |
| 279 ->301          | 0.14700   |           |           |          |
| 279 ->302          | -0.10238  |           |           |          |
| 279 ->312          | -0.11323  |           |           |          |
| 279 ->314          | -0.15664  |           |           |          |
| 282 ->314          | 0.13694   |           |           |          |
| Excited State 260: | Singlet-A | 4.0510 eV | 306.06 nm | f=0.0004 |
| 272 ->294          | 0.36427   |           |           |          |
| 273 ->294          | 0.55914   |           |           |          |
| Excited State 261: | Singlet-A | 4.0513 eV | 306.04 nm | f=0.0270 |
| 271 ->297          | 0.17359   |           |           |          |
| 275 ->297          | -0.13094  |           |           |          |
| 276 ->307          | -0.12112  |           |           |          |
| 277 ->304          | -0.10546  |           |           |          |
| 284 ->299          | 0.27766   |           |           |          |
| Excited State 262: | Singlet-A | 4.0539 eV | 305.84 nm | f=0.0014 |
| 271 ->297          | 0.15234   |           |           |          |

|                    |           |           |           |          |
|--------------------|-----------|-----------|-----------|----------|
| 275 ->297          | -0.12284  |           |           |          |
| 276 ->303          | -0.10803  |           |           |          |
| 278 ->302          | -0.13192  |           |           |          |
| 282 ->301          | -0.12294  |           |           |          |
| 283 ->298          | -0.19630  |           |           |          |
| 284 ->298          | 0.23704   |           |           |          |
| 284 ->299          | -0.14125  |           |           |          |
| 284 ->301          | -0.18857  |           |           |          |
| Excited State 263: | Singlet-A | 4.0622 eV | 305.21 nm | f=0.0112 |
| 271 ->297          | 0.13829   |           |           |          |
| 275 ->297          | -0.10812  |           |           |          |
| 277 ->299          | 0.17854   |           |           |          |
| 277 ->304          | 0.15992   |           |           |          |
| 277 ->307          | 0.12795   |           |           |          |
| 280 ->313          | -0.12220  |           |           |          |
| 283 ->299          | 0.10590   |           |           |          |
| 284 ->315          | -0.10150  |           |           |          |
| Excited State 264: | Singlet-A | 4.0678 eV | 304.79 nm | f=0.0027 |
| 271 ->297          | -0.14671  |           |           |          |
| 275 ->297          | 0.10127   |           |           |          |
| 280 ->300          | -0.12048  |           |           |          |
| 280 ->313          | 0.19673   |           |           |          |
| 280 ->315          | 0.16026   |           |           |          |
| 284 ->299          | 0.12752   |           |           |          |
| 284 ->315          | 0.25940   |           |           |          |
| Excited State 265: | Singlet-A | 4.0731 eV | 304.40 nm | f=0.0030 |
| 267 ->294          | 0.10242   |           |           |          |
| 269 ->294          | 0.40204   |           |           |          |
| 271 ->294          | 0.35411   |           |           |          |
| 275 ->294          | 0.13402   |           |           |          |
| 279 ->314          | -0.12924  |           |           |          |
| 281 ->314          | -0.10629  |           |           |          |
| 282 ->314          | 0.15913   |           |           |          |
| Excited State 266: | Singlet-A | 4.0802 eV | 303.86 nm | f=0.0261 |
| 272 ->300          | -0.10750  |           |           |          |
| 274 ->295          | -0.10869  |           |           |          |
| 276 ->300          | 0.14633   |           |           |          |
| 277 ->300          | -0.13735  |           |           |          |
| 280 ->313          | -0.12768  |           |           |          |
| 280 ->315          | 0.10787   |           |           |          |

|                    |           |           |           |          |
|--------------------|-----------|-----------|-----------|----------|
| 281 ->299          | 0.11236   |           |           |          |
| 282 ->299          | 0.17256   |           |           |          |
| 282 ->300          | 0.10422   |           |           |          |
| 282 ->303          | 0.11135   |           |           |          |
| 283 ->299          | -0.12506  |           |           |          |
| 284 ->299          | -0.12800  |           |           |          |
| 285 ->299          | 0.17301   |           |           |          |
| 285 ->300          | -0.16502  |           |           |          |
| Excited State 267: | Singlet-A | 4.0832 eV | 303.64 nm | f=0.0015 |
| 271 ->295          | 0.12835   |           |           |          |
| 272 ->295          | -0.26102  |           |           |          |
| 273 ->295          | 0.10737   |           |           |          |
| 274 ->295          | 0.55976   |           |           |          |
| Excited State 268: | Singlet-A | 4.0839 eV | 303.59 nm | f=0.0012 |
| 263 ->288          | 0.10827   |           |           |          |
| 267 ->296          | 0.12918   |           |           |          |
| 272 ->295          | 0.11157   |           |           |          |
| 274 ->295          | -0.18319  |           |           |          |
| 275 ->296          | 0.15377   |           |           |          |
| 279 ->309          | -0.10247  |           |           |          |
| 279 ->312          | 0.19810   |           |           |          |
| 282 ->312          | 0.12703   |           |           |          |
| 284 ->299          | -0.11178  |           |           |          |
| 285 ->299          | -0.14224  |           |           |          |
| 285 ->312          | -0.12342  |           |           |          |
| Excited State 269: | Singlet-A | 4.0862 eV | 303.42 nm | f=0.0027 |
| 266 ->295          | -0.11725  |           |           |          |
| 280 ->298          | 0.13207   |           |           |          |
| 280 ->300          | 0.16179   |           |           |          |
| 280 ->313          | 0.31286   |           |           |          |
| 280 ->315          | -0.31142  |           |           |          |
| Excited State 270: | Singlet-A | 4.0896 eV | 303.17 nm | f=0.0074 |
| 263 ->288          | 0.16551   |           |           |          |
| 267 ->296          | -0.13735  |           |           |          |
| 275 ->296          | -0.15616  |           |           |          |
| 279 ->309          | 0.11908   |           |           |          |
| 279 ->312          | -0.16128  |           |           |          |
| 282 ->299          | -0.13843  |           |           |          |
| 282 ->303          | -0.12437  |           |           |          |
| 283 ->299          | 0.10166   |           |           |          |

|                    |           |           |           |          |
|--------------------|-----------|-----------|-----------|----------|
| 285 ->299          | -0.15975  |           |           |          |
| 285 ->300          | -0.11332  |           |           |          |
| 285 ->312          | 0.10768   |           |           |          |
| Excited State 271: | Singlet-A | 4.0941 eV | 302.84 nm | f=0.0047 |
| 263 ->288          | 0.13238   |           |           |          |
| 265 ->288          | 0.10012   |           |           |          |
| 275 ->300          | -0.14005  |           |           |          |
| 283 ->300          | 0.11961   |           |           |          |
| 284 ->299          | -0.14188  |           |           |          |
| 285 ->300          | 0.19364   |           |           |          |
| 285 ->301          | 0.15387   |           |           |          |
| Excited State 272: | Singlet-A | 4.0993 eV | 302.45 nm | f=0.0009 |
| 261 ->288          | -0.12347  |           |           |          |
| 263 ->288          | 0.22187   |           |           |          |
| 265 ->288          | 0.13679   |           |           |          |
| 276 ->305          | -0.10533  |           |           |          |
| 278 ->305          | 0.10135   |           |           |          |
| 283 ->299          | -0.10590  |           |           |          |
| 283 ->300          | -0.12498  |           |           |          |
| 284 ->299          | 0.36815   |           |           |          |
| Excited State 273: | Singlet-A | 4.1046 eV | 302.06 nm | f=0.0084 |
| 272 ->301          | 0.14810   |           |           |          |
| 273 ->301          | -0.10065  |           |           |          |
| 275 ->298          | -0.16011  |           |           |          |
| 277 ->302          | 0.10335   |           |           |          |
| 280 ->311          | 0.10558   |           |           |          |
| 283 ->300          | -0.14019  |           |           |          |
| 284 ->301          | 0.13450   |           |           |          |
| 285 ->300          | -0.11976  |           |           |          |
| 285 ->301          | 0.25288   |           |           |          |
| 285 ->314          | 0.10361   |           |           |          |
| Excited State 274: | Singlet-A | 4.1053 eV | 302.01 nm | f=0.0070 |
| 275 ->297          | 0.12396   |           |           |          |
| 282 ->300          | 0.12390   |           |           |          |
| 283 ->300          | 0.31699   |           |           |          |
| 283 ->303          | 0.12462   |           |           |          |
| 285 ->300          | 0.19061   |           |           |          |
| Excited State 275: | Singlet-A | 4.1088 eV | 301.75 nm | f=0.0016 |
| 266 ->297          | -0.14315  |           |           |          |

|                    |           |           |           |          |
|--------------------|-----------|-----------|-----------|----------|
| 275 ->297          | 0.14891   |           |           |          |
| 275 ->301          | -0.12026  |           |           |          |
| 280 ->311          | 0.16313   |           |           |          |
| 281 ->299          | 0.13331   |           |           |          |
| 282 ->299          | 0.12447   |           |           |          |
| 282 ->313          | -0.11320  |           |           |          |
| 283 ->299          | -0.12440  |           |           |          |
| 283 ->313          | 0.10862   |           |           |          |
| 284 ->301          | 0.11602   |           |           |          |
| 285 ->299          | 0.14362   |           |           |          |
| 285 ->302          | 0.17036   |           |           |          |
| Excited State 276: | Singlet-A | 4.1119 eV | 301.52 nm | f=0.0005 |
| 267 ->294          | -0.20216  |           |           |          |
| 269 ->294          | -0.17190  |           |           |          |
| 270 ->294          | -0.26186  |           |           |          |
| 271 ->294          | 0.43105   |           |           |          |
| 272 ->294          | -0.10832  |           |           |          |
| 274 ->294          | -0.12163  |           |           |          |
| 282 ->314          | -0.11261  |           |           |          |
| Excited State 277: | Singlet-A | 4.1137 eV | 301.39 nm | f=0.0070 |
| 275 ->298          | -0.10542  |           |           |          |
| 275 ->300          | 0.11975   |           |           |          |
| 278 ->298          | 0.11003   |           |           |          |
| 282 ->300          | 0.12646   |           |           |          |
| 282 ->312          | 0.10168   |           |           |          |
| 283 ->300          | 0.10635   |           |           |          |
| 283 ->314          | -0.10348  |           |           |          |
| 284 ->301          | 0.12640   |           |           |          |
| 285 ->301          | 0.11928   |           |           |          |
| 285 ->314          | -0.10871  |           |           |          |
| Excited State 278: | Singlet-A | 4.1176 eV | 301.11 nm | f=0.0059 |
| 266 ->297          | 0.10602   |           |           |          |
| 275 ->297          | -0.11582  |           |           |          |
| 280 ->313          | 0.10562   |           |           |          |
| 283 ->299          | 0.11242   |           |           |          |
| 283 ->303          | 0.10067   |           |           |          |
| 284 ->301          | 0.13467   |           |           |          |
| 284 ->302          | -0.12483  |           |           |          |
| 284 ->303          | 0.15207   |           |           |          |
| 285 ->301          | -0.12949  |           |           |          |

|                    |           |           |           |          |
|--------------------|-----------|-----------|-----------|----------|
| Excited State 279: | Singlet-A | 4.1211 eV | 300.85 nm | f=0.0020 |
| 266 ->295          | -0.10780  |           |           |          |
| 269 ->294          | -0.16737  |           |           |          |
| 271 ->294          | 0.13061   |           |           |          |
| 282 ->303          | -0.15637  |           |           |          |
| 283 ->300          | 0.24081   |           |           |          |
| 283 ->303          | -0.18745  |           |           |          |
| 285 ->300          | 0.13210   |           |           |          |
| Excited State 280: | Singlet-A | 4.1253 eV | 300.54 nm | f=0.0044 |
| 266 ->295          | 0.30816   |           |           |          |
| 267 ->295          | 0.15068   |           |           |          |
| 268 ->295          | 0.14596   |           |           |          |
| 269 ->295          | 0.20118   |           |           |          |
| 270 ->295          | 0.10667   |           |           |          |
| 271 ->295          | 0.20638   |           |           |          |
| 280 ->313          | 0.14283   |           |           |          |
| 284 ->313          | 0.11847   |           |           |          |
| 284 ->315          | -0.10959  |           |           |          |
| Excited State 281: | Singlet-A | 4.1279 eV | 300.36 nm | f=0.0004 |
| 263 ->290          | -0.10055  |           |           |          |
| 274 ->304          | 0.10970   |           |           |          |
| 282 ->300          | 0.12179   |           |           |          |
| 283 ->301          | -0.12318  |           |           |          |
| 283 ->303          | -0.15551  |           |           |          |
| 284 ->301          | -0.14624  |           |           |          |
| 284 ->302          | 0.23953   |           |           |          |
| 284 ->303          | -0.23245  |           |           |          |
| Excited State 282: | Singlet-A | 4.1294 eV | 300.25 nm | f=0.0023 |
| 259 ->288          | -0.14617  |           |           |          |
| 263 ->290          | 0.12872   |           |           |          |
| 264 ->288          | -0.10131  |           |           |          |
| 267 ->294          | -0.10182  |           |           |          |
| 269 ->294          | 0.14949   |           |           |          |
| 274 ->304          | 0.15713   |           |           |          |
| 274 ->306          | 0.11456   |           |           |          |
| 274 ->309          | 0.15812   |           |           |          |
| 274 ->310          | 0.12590   |           |           |          |
| 282 ->303          | 0.13462   |           |           |          |
| Excited State 283: | Singlet-A | 4.1323 eV | 300.04 nm | f=0.0030 |
| 267 ->294          | 0.15167   |           |           |          |

|                    |           |           |           |          |
|--------------------|-----------|-----------|-----------|----------|
| 269 ->294          | -0.20923  |           |           |          |
| 271 ->296          | -0.10312  |           |           |          |
| 272 ->296          | -0.19221  |           |           |          |
| 273 ->296          | 0.14359   |           |           |          |
| 274 ->296          | -0.12607  |           |           |          |
| 275 ->296          | 0.13477   |           |           |          |
| 276 ->298          | 0.10121   |           |           |          |
| 282 ->314          | 0.14821   |           |           |          |
| 283 ->302          | 0.10769   |           |           |          |
| 283 ->303          | 0.21665   |           |           |          |
| 285 ->303          | 0.12296   |           |           |          |
| Excited State 284: | Singlet-A | 4.1359 eV | 299.77 nm | f=0.0033 |
| 270 ->296          | 0.13230   |           |           |          |
| 271 ->296          | 0.16545   |           |           |          |
| 272 ->296          | 0.25953   |           |           |          |
| 273 ->296          | -0.21477  |           |           |          |
| 274 ->296          | 0.15838   |           |           |          |
| 275 ->296          | -0.15062  |           |           |          |
| 281 ->303          | 0.10409   |           |           |          |
| 282 ->300          | -0.13222  |           |           |          |
| 282 ->303          | -0.12306  |           |           |          |
| 283 ->303          | 0.13412   |           |           |          |
| 285 ->303          | 0.11744   |           |           |          |
| Excited State 285: | Singlet-A | 4.1371 eV | 299.69 nm | f=0.0043 |
| 266 ->294          | -0.11159  |           |           |          |
| 267 ->294          | 0.23016   |           |           |          |
| 269 ->294          | -0.20835  |           |           |          |
| 270 ->296          | 0.10965   |           |           |          |
| 271 ->296          | 0.12479   |           |           |          |
| 272 ->296          | 0.18018   |           |           |          |
| 273 ->296          | -0.15742  |           |           |          |
| 274 ->296          | 0.10823   |           |           |          |
| 275 ->296          | -0.10030  |           |           |          |
| 281 ->300          | -0.12489  |           |           |          |
| 281 ->303          | -0.10488  |           |           |          |
| 282 ->300          | 0.16417   |           |           |          |
| 282 ->303          | 0.12026   |           |           |          |
| 282 ->314          | 0.12661   |           |           |          |
| 285 ->303          | -0.11537  |           |           |          |
| Excited State 286: | Singlet-A | 4.1397 eV | 299.50 nm | f=0.0003 |
| 272 ->305          | -0.10197  |           |           |          |



|                    |           |           |           |          |
|--------------------|-----------|-----------|-----------|----------|
| 272 ->306          | 0.10861   |           |           |          |
| 272 ->308          | -0.10969  |           |           |          |
| 273 ->305          | -0.17191  |           |           |          |
| 273 ->306          | 0.23856   |           |           |          |
| 273 ->307          | -0.21648  |           |           |          |
| 273 ->308          | -0.22825  |           |           |          |
| 273 ->309          | -0.14510  |           |           |          |
| 273 ->310          | -0.10638  |           |           |          |
| 282 ->300          | -0.14320  |           |           |          |
| Excited State 287: | Singlet-A | 4.1418 eV | 299.35 nm | f=0.0002 |
| 274 ->304          | -0.15909  |           |           |          |
| 274 ->306          | -0.10781  |           |           |          |
| 274 ->309          | -0.13676  |           |           |          |
| 274 ->310          | -0.11722  |           |           |          |
| 282 ->303          | -0.11108  |           |           |          |
| 283 ->303          | 0.16296   |           |           |          |
| 284 ->301          | -0.12820  |           |           |          |
| 284 ->302          | 0.20325   |           |           |          |
| 284 ->303          | -0.14702  |           |           |          |
| Excited State 288: | Singlet-A | 4.1521 eV | 298.61 nm | f=0.0019 |
| 269 ->295          | 0.17350   |           |           |          |
| 270 ->295          | 0.19205   |           |           |          |
| 271 ->295          | 0.14008   |           |           |          |
| 271 ->297          | 0.16004   |           |           |          |
| 272 ->297          | 0.21919   |           |           |          |
| 273 ->297          | -0.10822  |           |           |          |
| 275 ->297          | 0.18290   |           |           |          |
| 282 ->303          | -0.14218  |           |           |          |
| Excited State 289: | Singlet-A | 4.1557 eV | 298.35 nm | f=0.0055 |
| 271 ->297          | 0.21525   |           |           |          |
| 272 ->297          | 0.26455   |           |           |          |
| 273 ->297          | -0.13123  |           |           |          |
| 275 ->297          | 0.18696   |           |           |          |
| 275 ->299          | 0.11440   |           |           |          |
| 277 ->299          | -0.13384  |           |           |          |
| 283 ->301          | -0.15744  |           |           |          |
| 285 ->302          | -0.15361  |           |           |          |
| Excited State 290: | Singlet-A | 4.1567 eV | 298.28 nm | f=0.0021 |
| 269 ->295          | 0.18337   |           |           |          |
| 270 ->295          | 0.22931   |           |           |          |

|                    |           |           |           |          |
|--------------------|-----------|-----------|-----------|----------|
| 271 ->295          | 0.14148   |           |           |          |
| 277 ->301          | 0.13628   |           |           |          |
| 281 ->300          | 0.10160   |           |           |          |
| 282 ->303          | 0.21675   |           |           |          |
| 285 ->302          | 0.11938   |           |           |          |
| Excited State 291: | Singlet-A | 4.1595 eV | 298.07 nm | f=0.0013 |
| 266 ->295          | 0.13398   |           |           |          |
| 269 ->295          | -0.13478  |           |           |          |
| 270 ->295          | -0.20933  |           |           |          |
| 271 ->297          | 0.20594   |           |           |          |
| 272 ->297          | 0.23935   |           |           |          |
| 273 ->297          | -0.12382  |           |           |          |
| 275 ->297          | 0.13865   |           |           |          |
| 280 ->313          | 0.10356   |           |           |          |
| 283 ->301          | 0.11044   |           |           |          |
| 283 ->302          | 0.13039   |           |           |          |
| 284 ->315          | -0.10683  |           |           |          |
| 285 ->302          | 0.17347   |           |           |          |
| Excited State 292: | Singlet-A | 4.1632 eV | 297.81 nm | f=0.0005 |
| 270 ->295          | 0.13712   |           |           |          |
| 275 ->298          | 0.12905   |           |           |          |
| 277 ->302          | 0.10245   |           |           |          |
| 281 ->301          | 0.11250   |           |           |          |
| 283 ->298          | 0.13388   |           |           |          |
| 283 ->301          | 0.19972   |           |           |          |
| 283 ->302          | 0.32168   |           |           |          |
| 283 ->303          | -0.12317  |           |           |          |
| 285 ->301          | 0.21596   |           |           |          |
| 285 ->302          | 0.12812   |           |           |          |
| 285 ->303          | -0.12475  |           |           |          |
| Excited State 293: | Singlet-A | 4.1705 eV | 297.29 nm | f=0.0017 |
| 277 ->302          | 0.11221   |           |           |          |
| 281 ->303          | -0.18159  |           |           |          |
| 282 ->315          | -0.10013  |           |           |          |
| 283 ->315          | 0.10613   |           |           |          |
| 284 ->301          | -0.14303  |           |           |          |
| 284 ->302          | 0.26128   |           |           |          |
| 284 ->303          | 0.13106   |           |           |          |
| 284 ->304          | 0.14211   |           |           |          |
| 285 ->303          | -0.25583  |           |           |          |

|                    |           |           |           |          |
|--------------------|-----------|-----------|-----------|----------|
| Excited State 294: | Singlet-A | 4.1722 eV | 297.17 nm | f=0.0023 |
| 275 ->298          | -0.17782  |           |           |          |
| 281 ->301          | -0.14315  |           |           |          |
| 281 ->306          | 0.16524   |           |           |          |
| 281 ->307          | -0.11349  |           |           |          |
| 281 ->308          | -0.13354  |           |           |          |
| 282 ->298          | 0.12985   |           |           |          |
| 282 ->302          | 0.17797   |           |           |          |
| 283 ->301          | 0.17585   |           |           |          |
| Excited State 295: | Singlet-A | 4.1731 eV | 297.10 nm | f=0.0001 |
| 272 ->296          | 0.36560   |           |           |          |
| 273 ->296          | 0.58681   |           |           |          |
| Excited State 296: | Singlet-A | 4.1747 eV | 296.99 nm | f=0.0008 |
| 271 ->300          | -0.10427  |           |           |          |
| 272 ->300          | 0.14089   |           |           |          |
| 274 ->300          | 0.11704   |           |           |          |
| 281 ->300          | -0.18493  |           |           |          |
| 281 ->301          | 0.11367   |           |           |          |
| 281 ->303          | 0.11319   |           |           |          |
| 282 ->300          | 0.26388   |           |           |          |
| 282 ->301          | -0.16095  |           |           |          |
| 282 ->302          | -0.10813  |           |           |          |
| 284 ->315          | -0.11910  |           |           |          |
| 285 ->303          | 0.14453   |           |           |          |
| Excited State 297: | Singlet-A | 4.1777 eV | 296.78 nm | f=0.0017 |
| 269 ->295          | -0.20047  |           |           |          |
| 270 ->295          | 0.32358   |           |           |          |
| 284 ->301          | -0.13911  |           |           |          |
| 284 ->302          | 0.21956   |           |           |          |
| 284 ->303          | 0.27386   |           |           |          |
| 284 ->304          | -0.14340  |           |           |          |
| Excited State 298: | Singlet-A | 4.1813 eV | 296.52 nm | f=0.0010 |
| 269 ->295          | 0.28016   |           |           |          |
| 270 ->295          | -0.29016  |           |           |          |
| 284 ->301          | -0.11977  |           |           |          |
| 284 ->302          | 0.16972   |           |           |          |
| 284 ->303          | 0.31429   |           |           |          |
| Excited State 299: | Singlet-A | 4.1859 eV | 296.19 nm | f=0.0056 |
| 268 ->298          | -0.10804  |           |           |          |

|           |          |
|-----------|----------|
| 275 ->298 | 0.18532  |
| 275 ->302 | -0.11019 |
| 281 ->301 | 0.10866  |
| 281 ->306 | 0.10990  |
| 281 ->308 | -0.15178 |
| 282 ->304 | -0.13778 |
| 283 ->303 | 0.14573  |
| 284 ->304 | 0.25332  |

Excited State 300: Singlet-A 4.1882 eV 296.03 nm f=0.0008

|           |          |
|-----------|----------|
| 271 ->297 | 0.12660  |
| 272 ->297 | -0.28222 |
| 273 ->297 | 0.11910  |
| 274 ->297 | 0.58130  |

**Orbital coefficients of atoms corresponding to peaks 1 and 2 in absorption spectrum of cluster 2 in DMF solution**

**Peak 1: 274→289; 274→293**

**274(HOMO-11)**

|    |   |      |          |
|----|---|------|----------|
| 17 | S | 1S   | -0.00002 |
|    |   | 2S   | 0.00000  |
|    |   | 2PX  | -0.04553 |
|    |   | 2PY  | 0.07244  |
|    |   | 2PZ  | 0.07382  |
|    |   | 3S   | -0.00058 |
|    |   | 3PX  | 0.11965  |
|    |   | 3PY  | -0.18989 |
|    |   | 3PZ  | -0.19352 |
|    |   | 4S   | 0.00386  |
|    |   | 4PX  | 0.07466  |
|    |   | 4PY  | -0.12454 |
|    |   | 4PZ  | -0.12827 |
|    |   | 5D 0 | 0.00548  |
|    |   | 5D+1 | -0.00141 |
|    |   | 5D-1 | -0.00070 |
|    |   | 5D+2 | 0.00418  |
|    |   | 5D-2 | 0.00162  |
| 27 | S | 1S   | 0.00001  |
|    |   | 2S   | -0.00018 |
|    |   | 2PX  | -0.02967 |
|    |   | 2PY  | 0.07752  |
|    |   | 2PZ  | -0.07526 |

|    |   |      |          |
|----|---|------|----------|
|    |   | 3S   | -0.00035 |
|    |   | 3PX  | 0.07779  |
|    |   | 3PY  | -0.20333 |
|    |   | 3PZ  | 0.19749  |
|    |   | 4S   | 0.00324  |
|    |   | 4PX  | 0.05093  |
|    |   | 4PY  | -0.13125 |
|    |   | 4PZ  | 0.12514  |
|    |   | 5D 0 | -0.00594 |
|    |   | 5D+1 | -0.00144 |
|    |   | 5D-1 | 0.00012  |
|    |   | 5D+2 | -0.00359 |
|    |   | 5D-2 | -0.00174 |
| 30 | S | 1S   | -0.00038 |
|    |   | 2S   | 0.00175  |
|    |   | 2PX  | 0.02891  |
|    |   | 2PY  | -0.08185 |
|    |   | 2PZ  | 0.08624  |
|    |   | 3S   | -0.00384 |
|    |   | 3PX  | -0.07591 |
|    |   | 3PY  | 0.21500  |
|    |   | 3PZ  | -0.22650 |
|    |   | 4S   | -0.00882 |
|    |   | 4PX  | -0.04683 |
|    |   | 4PY  | 0.13472  |
|    |   | 4PZ  | -0.14555 |
|    |   | 5D 0 | -0.00738 |
|    |   | 5D+1 | 0.00096  |
|    |   | 5D-1 | -0.00009 |
|    |   | 5D+2 | -0.00232 |
|    |   | 5D-2 | -0.00350 |
| 32 | S | 1S   | 0.00004  |
|    |   | 2S   | -0.00007 |
|    |   | 2PX  | 0.04321  |
|    |   | 2PY  | -0.06445 |
|    |   | 2PZ  | -0.09101 |
|    |   | 3S   | 0.00084  |
|    |   | 3PX  | -0.11338 |
|    |   | 3PY  | 0.16871  |
|    |   | 3PZ  | 0.23856  |
|    |   | 4S   | -0.00195 |
|    |   | 4PX  | -0.07148 |
|    |   | 4PY  | 0.11272  |
|    |   | 4PZ  | 0.15612  |

|      |          |
|------|----------|
| 5D 0 | 0.00701  |
| 5D+1 | 0.00042  |
| 5D-1 | -0.00067 |
| 5D+2 | 0.00213  |
| 5D-2 | 0.00241  |

.....

**289(LUMO+3)**

|    |   |      |          |
|----|---|------|----------|
| 3  | W | 1S   | -0.00020 |
|    |   | 2S   | 0.00254  |
|    |   | 3S   | -0.05579 |
|    |   | 4PX  | 0.00350  |
|    |   | 4PY  | -0.00288 |
|    |   | 4PZ  | -0.00208 |
|    |   | 5PX  | 0.00302  |
|    |   | 5PY  | 0.00000  |
|    |   | 5PZ  | -0.02011 |
|    |   | 6PX  | -0.16408 |
|    |   | 6PY  | -0.13625 |
|    |   | 6PZ  | -0.02521 |
|    |   | 7D 0 | 0.29274  |
|    |   | 7D+1 | -0.02926 |
|    |   | 7D-1 | -0.02238 |
|    |   | 7D+2 | 0.14239  |
|    |   | 7D-2 | 0.10515  |
|    |   | 8D 0 | 0.14677  |
|    |   | 8D+1 | -0.02054 |
|    |   | 8D-1 | -0.01211 |
|    |   | 8D+2 | 0.08934  |
|    |   | 8D-2 | 0.05116  |
|    |   | 9F 0 | -0.00021 |
|    |   | 9F+1 | 0.00025  |
|    |   | 9F-1 | 0.00001  |
|    |   | 9F+2 | 0.00010  |
|    |   | 9F-2 | -0.00057 |
|    |   | 9F+3 | 0.00050  |
|    |   | 9F-3 | 0.00022  |
| 17 | S | 1S   | -0.00031 |
|    |   | 2S   | 0.00100  |
|    |   | 2PX  | -0.01198 |
|    |   | 2PY  | 0.02631  |
|    |   | 2PZ  | 0.02969  |
|    |   | 3S   | -0.00480 |
|    |   | 3PX  | 0.03217  |

|      |      |          |
|------|------|----------|
|      | 3PY  | -0.06868 |
|      | 3PZ  | -0.07624 |
|      | 4S   | 0.00809  |
|      | 4PX  | 0.03703  |
|      | 4PY  | -0.08373 |
|      | 4PZ  | -0.11405 |
|      | 5D 0 | -0.01021 |
|      | 5D+1 | 0.00955  |
|      | 5D-1 | 0.00464  |
|      | 5D+2 | -0.01201 |
|      | 5D-2 | 0.00189  |
| 27 S | 1S   | -0.00071 |
|      | 2S   | 0.00252  |
|      | 2PX  | 0.01035  |
|      | 2PY  | -0.02650 |
|      | 2PZ  | 0.02552  |
|      | 3S   | -0.01024 |
|      | 3PX  | -0.02694 |
|      | 3PY  | 0.06871  |
|      | 3PZ  | -0.06434 |
|      | 4S   | 0.00942  |
|      | 4PX  | -0.03908 |
|      | 4PY  | 0.08576  |
|      | 4PZ  | -0.11034 |
|      | 5D 0 | -0.01312 |
|      | 5D+1 | -0.00761 |
|      | 5D-1 | -0.00141 |
|      | 5D+2 | -0.00918 |
|      | 5D-2 | 0.00338  |
| 30 S | 1S   | -0.00065 |
|      | 2S   | 0.00259  |
|      | 2PX  | -0.00643 |
|      | 2PY  | 0.02332  |
|      | 2PZ  | -0.02104 |
|      | 3S   | -0.00843 |
|      | 3PX  | 0.01550  |
|      | 3PY  | -0.06017 |
|      | 3PZ  | 0.05288  |
|      | 4S   | -0.01503 |
|      | 4PX  | 0.04089  |
|      | 4PY  | -0.09177 |
|      | 4PZ  | 0.08294  |
|      | 5D 0 | -0.01071 |
|      | 5D+1 | 0.01039  |

|    |   |      |          |
|----|---|------|----------|
|    |   | 5D-1 | 0.00365  |
|    |   | 5D+2 | -0.00023 |
|    |   | 5D-2 | -0.01362 |
| 32 | S | 1S   | -0.00023 |
|    |   | 2S   | 0.00030  |
|    |   | 2PX  | 0.00852  |
|    |   | 2PY  | -0.02479 |
|    |   | 2PZ  | -0.02802 |
|    |   | 3S   | -0.00535 |
|    |   | 3PX  | -0.02154 |
|    |   | 3PY  | 0.06461  |
|    |   | 3PZ  | 0.07126  |
|    |   | 4S   | 0.00934  |
|    |   | 4PX  | -0.03431 |
|    |   | 4PY  | 0.08617  |
|    |   | 4PZ  | 0.10937  |
|    |   | 5D 0 | -0.01220 |
|    |   | 5D+1 | -0.00812 |
|    |   | 5D-1 | -0.00197 |
|    |   | 5D+2 | 0.00002  |
|    |   | 5D-2 | -0.01017 |
| 5  | W | 1S   | -0.00149 |
|    |   | 2S   | -0.01114 |
|    |   | 3S   | -0.01442 |
|    |   | 4PX  | -0.00193 |
|    |   | 4PY  | -0.00505 |
|    |   | 4PZ  | -0.00043 |
|    |   | 5PX  | -0.01488 |
|    |   | 5PY  | 0.02159  |
|    |   | 5PZ  | -0.00423 |
|    |   | 6PX  | -0.03457 |
|    |   | 6PY  | 0.14629  |
|    |   | 6PZ  | -0.01795 |
|    |   | 7D 0 | 0.39100  |
|    |   | 7D+1 | 0.12421  |
|    |   | 7D-1 | -0.00747 |
|    |   | 7D+2 | 0.18085  |
|    |   | 7D-2 | 0.07068  |
|    |   | 8D 0 | 0.20313  |
|    |   | 8D+1 | 0.07544  |
|    |   | 8D-1 | 0.00141  |
|    |   | 8D+2 | 0.09967  |
|    |   | 8D-2 | 0.03310  |



|    |      |          |
|----|------|----------|
|    | 9F 0 | 0.00002  |
|    | 9F+1 | -0.00064 |
|    | 9F-1 | -0.00110 |
|    | 9F+2 | -0.00020 |
|    | 9F-2 | -0.00072 |
|    | 9F+3 | -0.00073 |
|    | 9F-3 | -0.00054 |
| 15 | S 1S | -0.00022 |
|    | 2S   | 0.00076  |
|    | 2PX  | 0.00610  |
|    | 2PY  | 0.02777  |
|    | 2PZ  | 0.02899  |
|    | 3S   | -0.00303 |
|    | 3PX  | -0.01477 |
|    | 3PY  | -0.07296 |
|    | 3PZ  | -0.07631 |
|    | 4S   | 0.02052  |
|    | 4PX  | -0.02526 |
|    | 4PY  | -0.08382 |
|    | 4PZ  | -0.10139 |
|    | 5D 0 | -0.01889 |
|    | 5D+1 | 0.00407  |
|    | 5D-1 | 0.00269  |
|    | 5D+2 | -0.00771 |
|    | 5D-2 | 0.00875  |
| 20 | S 1S | -0.00018 |
|    | 2S   | 0.00069  |
|    | 2PX  | -0.01817 |
|    | 2PY  | 0.02892  |
|    | 2PZ  | -0.03001 |
|    | 3S   | -0.00227 |
|    | 3PX  | 0.04682  |
|    | 3PY  | -0.07693 |
|    | 3PZ  | 0.07830  |
|    | 4S   | 0.00852  |
|    | 4PX  | 0.06244  |
|    | 4PY  | -0.08181 |
|    | 4PZ  | 0.11011  |
|    | 5D 0 | -0.01816 |
|    | 5D+1 | 0.00475  |
|    | 5D-1 | 0.00139  |
|    | 5D+2 | 0.00119  |
|    | 5D-2 | -0.01335 |
| 22 | S 1S | -0.00018 |

|      |      |          |
|------|------|----------|
|      | 2S   | 0.00033  |
|      | 2PX  | 0.00566  |
|      | 2PY  | -0.02819 |
|      | 2PZ  | -0.03674 |
|      | 3S   | -0.00372 |
|      | 3PX  | -0.01500 |
|      | 3PY  | 0.07413  |
|      | 3PZ  | 0.09464  |
|      | 4S   | -0.00368 |
|      | 4PX  | -0.02462 |
|      | 4PY  | 0.09452  |
|      | 4PZ  | 0.13074  |
|      | 5D 0 | -0.01154 |
|      | 5D+1 | -0.01535 |
|      | 5D-1 | 0.00159  |
|      | 5D+2 | -0.00469 |
|      | 5D-2 | -0.01485 |
| 34 S | 1S   | -0.00016 |
|      | 2S   | 0.00053  |
|      | 2PX  | 0.01341  |
|      | 2PY  | -0.03774 |
|      | 2PZ  | 0.04307  |
|      | 3S   | -0.00250 |
|      | 3PX  | -0.03483 |
|      | 3PY  | 0.09972  |
|      | 3PZ  | -0.11197 |
|      | 4S   | -0.00515 |
|      | 4PX  | -0.04414 |
|      | 4PY  | 0.11713  |
|      | 4PZ  | -0.14762 |
|      | 5D 0 | -0.01268 |
|      | 5D+1 | -0.01353 |
|      | 5D-1 | -0.00624 |
|      | 5D+2 | -0.01528 |
|      | 5D-2 | 0.00727  |
| 2 W  | 1S   | -0.00122 |
|      | 2S   | -0.01125 |
|      | 3S   | -0.05325 |
|      | 4PX  | -0.00116 |
|      | 4PY  | 0.00714  |
|      | 4PZ  | 0.00348  |
|      | 5PX  | -0.02627 |
|      | 5PY  | 0.01054  |

|      |      |          |
|------|------|----------|
|      | 5PZ  | -0.00778 |
|      | 6PX  | -0.07049 |
|      | 6PY  | -0.09722 |
|      | 6PZ  | 0.00008  |
|      | 7D 0 | 0.37678  |
|      | 7D+1 | 0.03457  |
|      | 7D-1 | -0.02204 |
|      | 7D+2 | -0.07815 |
|      | 7D-2 | -0.04469 |
|      | 8D 0 | 0.19409  |
|      | 8D+1 | 0.03648  |
|      | 8D-1 | -0.03101 |
|      | 8D+2 | -0.05275 |
|      | 8D-2 | -0.03023 |
|      | 9F 0 | 0.00018  |
|      | 9F+1 | 0.00091  |
|      | 9F-1 | 0.00077  |
|      | 9F+2 | 0.00077  |
|      | 9F-2 | -0.00067 |
|      | 9F+3 | 0.00040  |
|      | 9F-3 | -0.00094 |
| 12 S | 1S   | -0.00083 |
|      | 2S   | 0.00366  |
|      | 2PX  | -0.02397 |
|      | 2PY  | -0.01013 |
|      | 2PZ  | 0.02217  |
|      | 3S   | -0.00911 |
|      | 3PX  | 0.06327  |
|      | 3PY  | 0.02641  |
|      | 3PZ  | -0.05736 |
|      | 4S   | -0.00091 |
|      | 4PX  | 0.07206  |
|      | 4PY  | 0.03149  |
|      | 4PZ  | -0.08446 |
|      | 5D 0 | -0.01450 |
|      | 5D+1 | -0.00043 |
|      | 5D-1 | -0.00880 |
|      | 5D+2 | -0.00428 |
|      | 5D-2 | 0.00860  |
| 18 S | 1S   | -0.00044 |
|      | 2S   | 0.00178  |
|      | 2PX  | 0.02536  |
|      | 2PY  | 0.01728  |
|      | 2PZ  | 0.03668  |

|    |      |          |          |
|----|------|----------|----------|
|    | 3S   | -0.00559 |          |
|    | 3PX  | -0.06755 |          |
|    | 3PY  | -0.04605 |          |
|    | 3PZ  | -0.09468 |          |
|    | 4S   | -0.01052 |          |
|    | 4PX  | -0.07860 |          |
|    | 4PY  | -0.04938 |          |
|    | 4PZ  | -0.13019 |          |
|    | 5D 0 | -0.01475 |          |
|    | 5D+1 | 0.00053  |          |
|    | 5D-1 | 0.00915  |          |
|    | 5D+2 | -0.00219 |          |
|    | 5D-2 | 0.01284  |          |
| 25 | S    | 1S       | -0.00141 |
|    |      | 2S       | 0.00648  |
|    |      | 2PX      | 0.02781  |
|    |      | 2PY      | 0.00539  |
|    |      | 2PZ      | -0.03142 |
|    |      | 3S       | -0.01497 |
|    |      | 3PX      | -0.07318 |
|    |      | 3PY      | -0.01381 |
|    |      | 3PZ      | 0.08009  |
|    |      | 4S       | -0.04661 |
|    |      | 4PX      | -0.10444 |
|    |      | 4PY      | -0.01407 |
|    |      | 4PZ      | 0.11375  |
|    |      | 5D 0     | -0.01582 |
|    |      | 5D+1     | -0.00735 |
|    |      | 5D-1     | 0.00905  |
|    |      | 5D+2     | 0.00874  |
|    |      | 5D-2     | -0.00490 |
| 29 | S    | 1S       | 0.00007  |
|    |      | 2S       | -0.00150 |
|    |      | 2PX      | -0.02699 |
|    |      | 2PY      | 0.00265  |
|    |      | 2PZ      | -0.03426 |
|    |      | 3S       | -0.00341 |
|    |      | 3PX      | 0.07059  |
|    |      | 3PY      | -0.00578 |
|    |      | 3PZ      | 0.08992  |
|    |      | 4S       | 0.05090  |
|    |      | 4PX      | 0.07484  |
|    |      | 4PY      | -0.00868 |
|    |      | 4PZ      | 0.12389  |

|      |          |
|------|----------|
| 5D 0 | -0.01477 |
| 5D+1 | 0.00445  |
| 5D-1 | -0.00582 |
| 5D+2 | 0.00802  |
| 5D-2 | -0.00862 |

.....

**293(LUMO+7)**

|    |   |      |          |
|----|---|------|----------|
| 3  | W | 1S   | -0.00010 |
|    |   | 2S   | 0.00046  |
|    |   | 3S   | 0.07638  |
|    |   | 4PX  | -0.00529 |
|    |   | 4PY  | 0.00424  |
|    |   | 4PZ  | -0.00377 |
|    |   | 5PX  | -0.00499 |
|    |   | 5PY  | -0.00991 |
|    |   | 5PZ  | -0.00125 |
|    |   | 6PX  | 0.05537  |
|    |   | 6PY  | -0.02134 |
|    |   | 6PZ  | 0.01443  |
|    |   | 7D 0 | 0.47122  |
|    |   | 7D+1 | -0.01061 |
|    |   | 7D-1 | -0.04232 |
|    |   | 7D+2 | 0.19049  |
|    |   | 7D-2 | 0.13903  |
|    |   | 8D 0 | 0.23852  |
|    |   | 8D+1 | -0.00133 |
|    |   | 8D-1 | -0.03359 |
|    |   | 8D+2 | 0.09399  |
|    |   | 8D-2 | 0.06135  |
|    |   | 9F 0 | 0.00017  |
|    |   | 9F+1 | -0.00005 |
|    |   | 9F-1 | 0.00021  |
|    |   | 9F+2 | -0.00029 |
|    |   | 9F-2 | 0.00045  |
|    |   | 9F+3 | 0.00006  |
|    |   | 9F-3 | -0.00048 |
| 17 | S | 1S   | 0.00034  |
|    |   | 2S   | -0.00101 |
|    |   | 2PX  | -0.01071 |
|    |   | 2PY  | 0.03453  |
|    |   | 2PZ  | 0.04543  |
|    |   | 3S   | 0.00562  |
|    |   | 3PX  | 0.02686  |

|      |      |          |
|------|------|----------|
|      | 3PY  | -0.08854 |
|      | 3PZ  | -0.11781 |
|      | 4S   | -0.01037 |
|      | 4PX  | 0.04195  |
|      | 4PY  | -0.13385 |
|      | 4PZ  | -0.15997 |
|      | 5D 0 | -0.01665 |
|      | 5D+1 | 0.01377  |
|      | 5D-1 | 0.00848  |
|      | 5D+2 | -0.01584 |
|      | 5D-2 | 0.00527  |
| 27 S | 1S   | 0.00059  |
|      | 2S   | -0.00263 |
|      | 2PX  | 0.00532  |
|      | 2PY  | -0.04080 |
|      | 2PZ  | 0.04326  |
|      | 3S   | 0.00668  |
|      | 3PX  | -0.01322 |
|      | 3PY  | 0.10527  |
|      | 3PZ  | -0.11318 |
|      | 4S   | 0.01793  |
|      | 4PX  | -0.02638 |
|      | 4PY  | 0.14388  |
|      | 4PZ  | -0.14811 |
|      | 5D 0 | -0.01950 |
|      | 5D+1 | -0.01055 |
|      | 5D-1 | -0.00191 |
|      | 5D+2 | -0.01685 |
|      | 5D-2 | 0.00700  |
| 30 S | 1S   | 0.00108  |
|      | 2S   | -0.00457 |
|      | 2PX  | -0.01531 |
|      | 2PY  | 0.03768  |
|      | 2PZ  | -0.04662 |
|      | 3S   | 0.01294  |
|      | 3PX  | 0.04014  |
|      | 3PY  | -0.09729 |
|      | 3PZ  | 0.12266  |
|      | 4S   | 0.02097  |
|      | 4PX  | 0.04567  |
|      | 4PY  | -0.13604 |
|      | 4PZ  | 0.15133  |
|      | 5D 0 | -0.01542 |
|      | 5D+1 | 0.01323  |

|    |   |      |          |
|----|---|------|----------|
|    |   | 5D-1 | 0.00331  |
|    |   | 5D+2 | -0.00028 |
|    |   | 5D-2 | -0.01677 |
| 32 | S | 1S   | 0.00003  |
|    |   | 2S   | 0.00053  |
|    |   | 2PX  | 0.01936  |
|    |   | 2PY  | -0.03747 |
|    |   | 2PZ  | -0.04210 |
|    |   | 3S   | 0.00275  |
|    |   | 3PX  | -0.05058 |
|    |   | 3PY  | 0.09582  |
|    |   | 3PZ  | 0.10894  |
|    |   | 4S   | -0.02147 |
|    |   | 4PX  | -0.07254 |
|    |   | 4PY  | 0.14637  |
|    |   | 4PZ  | 0.14361  |
|    |   | 5D 0 | -0.02063 |
|    |   | 5D+1 | -0.01067 |
|    |   | 5D-1 | -0.00353 |
|    |   | 5D+2 | 0.00150  |
|    |   | 5D-2 | -0.01697 |

.....

**Peak 2:284→313**

**284(HOMO-1)**

|    |   |      |          |
|----|---|------|----------|
| 14 | S | 1S   | 0.00007  |
|    |   | 2S   | -0.00011 |
|    |   | 2PX  | -0.07376 |
|    |   | 2PY  | -0.04811 |
|    |   | 2PZ  | -0.07695 |
|    |   | 3S   | 0.00153  |
|    |   | 3PX  | 0.19319  |
|    |   | 3PY  | 0.12640  |
|    |   | 3PZ  | 0.20075  |
|    |   | 4S   | 0.00376  |
|    |   | 4PX  | 0.12192  |
|    |   | 4PY  | 0.07920  |
|    |   | 4PZ  | 0.13721  |
|    |   | 5D 0 | -0.00405 |
|    |   | 5D+1 | -0.00013 |
|    |   | 5D-1 | 0.00022  |
|    |   | 5D+2 | -0.00085 |
|    |   | 5D-2 | 0.00219  |
| 21 | S | 1S   | 0.00007  |

|      |      |          |
|------|------|----------|
|      | 2S   | -0.00018 |
|      | 2PX  | 0.08769  |
|      | 2PY  | 0.03514  |
|      | 2PZ  | 0.05922  |
|      | 3S   | 0.00120  |
|      | 3PX  | -0.22897 |
|      | 3PY  | -0.09149 |
|      | 3PZ  | -0.15362 |
|      | 4S   | 0.01437  |
|      | 4PX  | -0.15658 |
|      | 4PY  | -0.05640 |
|      | 4PZ  | -0.10083 |
|      | 5D 0 | -0.00402 |
|      | 5D+1 | -0.00187 |
|      | 5D-1 | -0.00082 |
|      | 5D+2 | 0.00337  |
|      | 5D-2 | 0.00059  |
| 23 S | 1S   | 0.00036  |
|      | 2S   | -0.00185 |
|      | 2PX  | 0.05544  |
|      | 2PY  | 0.00484  |
|      | 2PZ  | -0.09757 |
|      | 3S   | 0.00321  |
|      | 3PX  | -0.14562 |
|      | 3PY  | -0.01225 |
|      | 3PZ  | 0.25525  |
|      | 4S   | 0.00345  |
|      | 4PX  | -0.08811 |
|      | 4PY  | -0.01003 |
|      | 4PZ  | 0.17491  |
|      | 5D 0 | 0.00415  |
|      | 5D+1 | 0.00463  |
|      | 5D-1 | -0.00059 |
|      | 5D+2 | -0.00250 |
|      | 5D-2 | -0.00005 |
| 25 S | 1S   | -0.00004 |
|      | 2S   | 0.00020  |
|      | 2PX  | 0.00539  |
|      | 2PY  | -0.00517 |
|      | 2PZ  | -0.01048 |
|      | 3S   | -0.00049 |
|      | 3PX  | -0.01449 |
|      | 3PY  | 0.01380  |
|      | 3PZ  | 0.02731  |



|    |   |                     |          |
|----|---|---------------------|----------|
|    |   | 4S                  | -0.00788 |
|    |   | 4PX                 | -0.01161 |
|    |   | 4PY                 | 0.00970  |
|    |   | 4PZ                 | 0.01767  |
|    |   | 5D 0                | 0.00046  |
|    |   | 5D+1                | -0.00024 |
|    |   | 5D-1                | 0.00054  |
|    |   | 5D+2                | -0.00002 |
|    |   | 5D-2                | 0.00002  |
|    |   | .....               |          |
|    |   | <b>313(LUMO+27)</b> |          |
| 6  | W | 1S                  | 0.00177  |
|    |   | 2S                  | 0.02617  |
|    |   | 3S                  | 0.15947  |
|    |   | 4PX                 | -0.13939 |
|    |   | 4PY                 | 0.07919  |
|    |   | 4PZ                 | 0.04306  |
|    |   | 5PX                 | 0.03781  |
|    |   | 5PY                 | -0.05338 |
|    |   | 5PZ                 | -0.00391 |
|    |   | 6PX                 | -0.22479 |
|    |   | 6PY                 | 0.07948  |
|    |   | 6PZ                 | 0.08992  |
|    |   | 7D 0                | -0.17026 |
|    |   | 7D+1                | 0.42965  |
|    |   | 7D-1                | -0.36165 |
|    |   | 7D+2                | 0.07998  |
|    |   | 7D-2                | -0.03976 |
|    |   | 8D 0                | -0.13201 |
|    |   | 8D+1                | 0.31795  |
|    |   | 8D-1                | -0.26187 |
|    |   | 8D+2                | 0.05381  |
|    |   | 8D-2                | -0.00027 |
|    |   | 9F 0                | -0.00095 |
|    |   | 9F+1                | 0.00397  |
|    |   | 9F-1                | -0.00157 |
|    |   | 9F+2                | 0.00084  |
|    |   | 9F-2                | -0.00128 |
|    |   | 9F+3                | -0.00118 |
|    |   | 9F-3                | -0.00605 |
| 14 | S | 1S                  | -0.00280 |
|    |   | 2S                  | 0.01382  |
|    |   | 2PX                 | 0.04355  |

|    |   |      |          |
|----|---|------|----------|
|    |   | 2PY  | -0.02717 |
|    |   | 2PZ  | -0.02043 |
|    |   | 3S   | -0.02653 |
|    |   | 3PX  | -0.11605 |
|    |   | 3PY  | 0.07251  |
|    |   | 3PZ  | 0.05376  |
|    |   | 4S   | -0.08902 |
|    |   | 4PX  | -0.16046 |
|    |   | 4PY  | 0.07263  |
|    |   | 4PZ  | 0.09704  |
|    |   | 5D 0 | 0.00513  |
|    |   | 5D+1 | -0.01694 |
|    |   | 5D-1 | 0.00226  |
|    |   | 5D+2 | 0.03174  |
|    |   | 5D-2 | 0.01562  |
| 21 | S | 1S   | 0.00656  |
|    |   | 2S   | -0.03795 |
|    |   | 2PX  | 0.06398  |
|    |   | 2PY  | -0.03576 |
|    |   | 2PZ  | -0.02460 |
|    |   | 3S   | 0.04280  |
|    |   | 3PX  | -0.16986 |
|    |   | 3PY  | 0.09578  |
|    |   | 3PZ  | 0.06621  |
|    |   | 4S   | 0.39768  |
|    |   | 4PX  | -0.29273 |
|    |   | 4PY  | 0.16415  |
|    |   | 4PZ  | 0.16721  |
|    |   | 5D 0 | 0.01191  |
|    |   | 5D+1 | 0.02847  |
|    |   | 5D-1 | -0.01459 |
|    |   | 5D+2 | -0.01115 |
|    |   | 5D-2 | 0.01677  |
| 23 | S | 1S   | -0.00930 |
|    |   | 2S   | 0.04919  |
|    |   | 2PX  | 0.06083  |
|    |   | 2PY  | -0.04230 |
|    |   | 2PZ  | -0.00111 |
|    |   | 3S   | -0.07679 |
|    |   | 3PX  | -0.16092 |
|    |   | 3PY  | 0.11323  |
|    |   | 3PZ  | 0.00321  |
|    |   | 4S   | -0.39061 |
|    |   | 4PX  | -0.30953 |

|      |       |          |
|------|-------|----------|
|      | 4PY   | 0.18634  |
|      | 4PZ   | -0.04388 |
|      | 5D 0  | -0.02638 |
|      | 5D+1  | 0.00787  |
|      | 5D-1  | -0.00672 |
|      | 5D+2  | 0.01412  |
|      | 5D-2  | -0.02242 |
| 35 S | 1S    | -0.00057 |
|      | 2S    | 0.00316  |
|      | 2PX   | 0.05501  |
|      | 2PY   | -0.03192 |
|      | 2PZ   | -0.01684 |
|      | 3S    | -0.00407 |
|      | 3PX   | -0.14654 |
|      | 3PY   | 0.08450  |
|      | 3PZ   | 0.04456  |
|      | 4S    | -0.03282 |
|      | 4PX   | -0.18497 |
|      | 4PY   | 0.11960  |
|      | 4PZ   | 0.06842  |
|      | 5D 0  | 0.00695  |
|      | 5D+1  | -0.00171 |
|      | 5D-1  | 0.00969  |
|      | 5D+2  | -0.03538 |
|      | 5D-2  | -0.01798 |
|      | ..... |          |

**Cartesian coordinates of cluster 3:**

|    |             |            |              |
|----|-------------|------------|--------------|
| W  | 27.39637410 | 6.71378140 | -28.66004180 |
| W  | 27.08032520 | 6.71378140 | -5.96944280  |
| W  | 27.15933740 | 8.05021860 | -11.64209260 |
| W  | 27.23834960 | 6.71378140 | -17.31474230 |
| W  | 27.31736180 | 8.05021860 | -22.98739210 |
| W  | 27.00131290 | 8.05021860 | -0.29679300  |
| Ag | 27.30188110 | 6.90541810 | -20.27291570 |
| Ag | 27.38089340 | 7.85858190 | -25.94556550 |
| Ag | 27.06484450 | 7.85858190 | -3.25496640  |
| Ag | 27.14385670 | 6.90541810 | -8.92761620  |
| Ag | 27.22286890 | 7.85858190 | -14.60026600 |
| S  | 25.30976790 | 6.24989650 | -7.17567500  |
| S  | 25.62581680 | 6.24989650 | -29.86627410 |
| S  | 25.23075560 | 8.51410350 | -1.50302530  |
| S  | 25.38878010 | 8.51410350 | -12.84832480 |
| S  | 25.54680460 | 8.51410350 | -24.19362430 |
| S  | 25.46779230 | 6.24989650 | -18.52097460 |
| S  | 28.98740080 | 8.52414300 | -12.78082030 |
| S  | 28.82937640 | 8.52414300 | -1.43552070  |
| S  | 28.90838860 | 6.23985700 | -7.10817050  |
| S  | 29.22443750 | 6.23985700 | -29.79876960 |
| S  | 29.06641310 | 6.23985700 | -18.45347000 |
| S  | 29.14542530 | 8.52414300 | -24.12611980 |
| S  | 26.98840130 | 5.88463510 | 0.14476600   |
| S  | 27.14642570 | 5.88463510 | -11.20053350 |
| S  | 27.30445020 | 5.88463510 | -22.54583300 |
| S  | 27.06741350 | 8.87936490 | -5.52788370  |
| S  | 27.22543790 | 8.87936490 | -16.87318330 |
| S  | 27.38346240 | 8.87936490 | -28.21848280 |
| S  | 27.26476540 | 9.30752090 | -21.17554770 |
| S  | 27.34377760 | 5.45647910 | -26.84819750 |
| S  | 27.02772870 | 5.45647910 | -4.15759850  |
| S  | 27.18575320 | 5.45647910 | -15.50289800 |
| S  | 27.10674100 | 9.30752090 | -9.83024820  |
| S  | 26.94871650 | 9.30752090 | 1.51505130   |

**Cluster 3 B3LYP/LanL2DZf+6-31Gd TD-PCM (300 states) in HMP (dielectric constant = 29.6)**

Excitation energies and oscillator strengths:

Excited State 1: Singlet-A 2.5746 eV 481.58 nm f=0.0000

|           |          |
|-----------|----------|
| 273 ->288 | -0.14390 |
| 278 ->287 | -0.19413 |
| 279 ->286 | 0.31818  |
| 284 ->286 | -0.21695 |
| 284 ->287 | 0.23253  |
| 284 ->288 | -0.16995 |
| 285 ->286 | -0.20951 |
| 285 ->287 | -0.17574 |
| 285 ->288 | -0.11315 |
| 285 ->289 | -0.18861 |

This state for optimization and/or second-order correction.

Total Energy, E(RPA) = -10694.8045888

Copying the excited state density for this state as the 1-particle RhoCI density.

|               |    |           |           |           |          |
|---------------|----|-----------|-----------|-----------|----------|
| Excited State | 2: | Singlet-A | 2.5832 eV | 479.96 nm | f=0.0014 |
| 273 ->287     |    | 0.11756   |           |           |          |
| 273 ->288     |    | -0.14300  |           |           |          |
| 278 ->286     |    | 0.16842   |           |           |          |
| 279 ->287     |    | -0.15360  |           |           |          |
| 284 ->286     |    | -0.19238  |           |           |          |
| 284 ->287     |    | 0.21349   |           |           |          |
| 284 ->288     |    | -0.21480  |           |           |          |
| 285 ->286     |    | 0.16968   |           |           |          |
| 285 ->287     |    | 0.27432   |           |           |          |
| 285 ->288     |    | 0.12235   |           |           |          |
| 285 ->289     |    | 0.26949   |           |           |          |

|               |    |           |           |           |          |
|---------------|----|-----------|-----------|-----------|----------|
| Excited State | 3: | Singlet-A | 2.6216 eV | 472.93 nm | f=0.0000 |
| 270 ->286     |    | -0.11168  |           |           |          |
| 273 ->286     |    | 0.13328   |           |           |          |
| 273 ->287     |    | -0.14002  |           |           |          |
| 275 ->286     |    | 0.13086   |           |           |          |
| 279 ->286     |    | 0.40827   |           |           |          |
| 279 ->288     |    | -0.13871  |           |           |          |
| 284 ->287     |    | -0.12462  |           |           |          |
| 284 ->288     |    | 0.19817   |           |           |          |
| 285 ->288     |    | 0.11406   |           |           |          |
| 285 ->289     |    | 0.20849   |           |           |          |

|               |    |           |           |           |          |
|---------------|----|-----------|-----------|-----------|----------|
| Excited State | 4: | Singlet-A | 2.6570 eV | 466.64 nm | f=0.0033 |
| 269 ->286     |    | 0.12016   |           |           |          |
| 270 ->287     |    | -0.11256  |           |           |          |
| 270 ->288     |    | -0.14497  |           |           |          |
| 273 ->286     |    | -0.16420  |           |           |          |

|                  |           |           |           |          |  |
|------------------|-----------|-----------|-----------|----------|--|
| 273 ->287        | 0.12374   |           |           |          |  |
| 275 ->286        | 0.24984   |           |           |          |  |
| 278 ->286        | -0.23734  |           |           |          |  |
| 278 ->288        | 0.10289   |           |           |          |  |
| 279 ->287        | 0.28590   |           |           |          |  |
| 279 ->288        | 0.12887   |           |           |          |  |
| 279 ->289        | -0.18969  |           |           |          |  |
| 284 ->288        | -0.14549  |           |           |          |  |
| 285 ->289        | 0.16049   |           |           |          |  |
| Excited State 5: | Singlet-A | 2.6745 eV | 463.58 nm | f=0.0054 |  |
| 271 ->293        | -0.13480  |           |           |          |  |
| 277 ->286        | -0.15750  |           |           |          |  |
| 277 ->287        | -0.21435  |           |           |          |  |
| 277 ->288        | -0.12975  |           |           |          |  |
| 277 ->289        | -0.26626  |           |           |          |  |
| 278 ->293        | 0.11704   |           |           |          |  |
| 285 ->290        | 0.11518   |           |           |          |  |
| 285 ->291        | 0.16414   |           |           |          |  |
| 285 ->293        | 0.38123   |           |           |          |  |
| Excited State 6: | Singlet-A | 2.6812 eV | 462.42 nm | f=0.0176 |  |
| 269 ->292        | -0.10357  |           |           |          |  |
| 272 ->288        | 0.11692   |           |           |          |  |
| 274 ->287        | 0.14348   |           |           |          |  |
| 274 ->288        | -0.13515  |           |           |          |  |
| 275 ->292        | 0.11738   |           |           |          |  |
| 276 ->286        | 0.18143   |           |           |          |  |
| 276 ->287        | -0.14791  |           |           |          |  |
| 278 ->291        | 0.12666   |           |           |          |  |
| 278 ->292        | -0.15905  |           |           |          |  |
| 279 ->290        | -0.13817  |           |           |          |  |
| 279 ->291        | 0.10694   |           |           |          |  |
| 280 ->287        | 0.11591   |           |           |          |  |
| 280 ->288        | -0.11528  |           |           |          |  |
| 284 ->290        | 0.15769   |           |           |          |  |
| 284 ->291        | -0.20870  |           |           |          |  |
| 284 ->292        | 0.31883   |           |           |          |  |
| Excited State 7: | Singlet-A | 2.7013 eV | 458.98 nm | f=0.0002 |  |
| 269 ->289        | -0.11689  |           |           |          |  |
| 271 ->287        | 0.15538   |           |           |          |  |
| 271 ->288        | 0.11382   |           |           |          |  |
| 271 ->289        | 0.27183   |           |           |          |  |

|           |          |
|-----------|----------|
| 275 ->286 | 0.18989  |
| 275 ->287 | 0.20469  |
| 275 ->289 | 0.11839  |
| 278 ->286 | 0.13979  |
| 278 ->287 | 0.18876  |
| 278 ->288 | 0.10748  |
| 278 ->289 | 0.19642  |
| 279 ->287 | -0.10518 |
| 279 ->289 | -0.18267 |
| 285 ->289 | -0.13499 |
| 285 ->295 | -0.12207 |

Excited State 8: Singlet-A 2.7067 eV 458.07 nm f=0.0037

|           |          |
|-----------|----------|
| 268 ->291 | 0.14166  |
| 269 ->290 | -0.11409 |
| 272 ->287 | -0.13976 |
| 274 ->286 | -0.19383 |
| 276 ->286 | -0.23236 |
| 276 ->288 | 0.13611  |
| 277 ->289 | -0.10814 |
| 278 ->291 | -0.11276 |
| 278 ->292 | -0.11462 |
| 279 ->290 | 0.35652  |
| 279 ->292 | -0.12418 |
| 284 ->292 | 0.13983  |
| 285 ->293 | 0.11733  |

Excited State 9: Singlet-A 2.7239 eV 455.18 nm f=0.0001

|           |          |
|-----------|----------|
| 268 ->290 | 0.16865  |
| 269 ->291 | -0.10545 |
| 272 ->286 | -0.23446 |
| 274 ->286 | -0.10161 |
| 274 ->287 | -0.15031 |
| 276 ->287 | -0.13594 |
| 276 ->288 | -0.16143 |
| 277 ->289 | -0.10264 |
| 278 ->290 | -0.17760 |
| 279 ->291 | 0.32504  |
| 279 ->292 | 0.18954  |
| 279 ->293 | -0.14800 |
| 284 ->292 | -0.11949 |
| 285 ->293 | 0.10003  |

Excited State 10: Singlet-A 2.7354 eV 453.26 nm f=0.0003

|           |          |
|-----------|----------|
| 269 ->286 | -0.20892 |
| 269 ->287 | -0.17094 |
| 269 ->289 | 0.11473  |
| 270 ->286 | 0.25038  |
| 271 ->287 | 0.12654  |
| 275 ->287 | -0.21474 |
| 275 ->289 | 0.28151  |
| 276 ->290 | -0.10894 |
| 278 ->286 | -0.16477 |
| 278 ->289 | 0.15801  |
| 279 ->286 | 0.10051  |
| 285 ->286 | -0.11064 |

Excited State 11: Singlet-A 2.7416 eV 452.24 nm f=0.0007

|           |          |
|-----------|----------|
| 270 ->286 | 0.21877  |
| 270 ->287 | -0.20490 |
| 271 ->286 | -0.11186 |
| 273 ->287 | -0.10762 |
| 273 ->288 | 0.24559  |
| 275 ->286 | 0.21785  |
| 275 ->288 | -0.18582 |
| 276 ->291 | 0.13712  |
| 278 ->288 | 0.14522  |
| 278 ->289 | -0.13142 |
| 279 ->287 | -0.18902 |
| 279 ->289 | 0.10072  |

Excited State 12: Singlet-A 2.7497 eV 450.91 nm f=0.0034

|           |          |
|-----------|----------|
| 269 ->287 | -0.10571 |
| 270 ->288 | 0.18091  |
| 272 ->290 | -0.13302 |
| 273 ->286 | 0.16121  |
| 273 ->287 | -0.18742 |
| 273 ->288 | 0.15686  |
| 274 ->291 | -0.11009 |
| 275 ->286 | -0.17202 |
| 275 ->287 | 0.10253  |
| 276 ->292 | -0.16633 |
| 278 ->287 | -0.12779 |
| 278 ->288 | 0.10153  |
| 279 ->288 | 0.20698  |
| 279 ->289 | -0.12200 |
| 281 ->294 | 0.23932  |



|                   |           |           |           |          |
|-------------------|-----------|-----------|-----------|----------|
| Excited State 13: | Singlet-A | 2.7582 eV | 449.52 nm | f=0.0001 |
| 271 ->289         | -0.10816  |           |           |          |
| 277 ->293         | -0.10113  |           |           |          |
| 282 ->295         | 0.47156   |           |           |          |
| 285 ->295         | -0.43029  |           |           |          |
| Excited State 14: | Singlet-A | 2.7594 eV | 449.32 nm | f=0.0012 |
| 279 ->288         | -0.10846  |           |           |          |
| 281 ->287         | 0.10124   |           |           |          |
| 281 ->294         | 0.58999   |           |           |          |
| 284 ->294         | 0.10413   |           |           |          |
| Excited State 15: | Singlet-A | 2.7760 eV | 446.63 nm | f=0.0003 |
| 277 ->293         | -0.10508  |           |           |          |
| 282 ->295         | -0.27303  |           |           |          |
| 283 ->297         | 0.55146   |           |           |          |
| 285 ->295         | -0.22858  |           |           |          |
| Excited State 16: | Singlet-A | 2.7877 eV | 444.76 nm | f=0.0008 |
| 280 ->286         | 0.25861   |           |           |          |
| 280 ->287         | -0.33316  |           |           |          |
| 280 ->288         | 0.33330   |           |           |          |
| 280 ->294         | -0.22937  |           |           |          |
| 284 ->291         | -0.11387  |           |           |          |
| 284 ->292         | 0.18032   |           |           |          |
| 284 ->296         | -0.21244  |           |           |          |
| Excited State 17: | Singlet-A | 2.8170 eV | 440.13 nm | f=0.0009 |
| 282 ->297         | -0.26127  |           |           |          |
| 283 ->286         | 0.11526   |           |           |          |
| 283 ->287         | 0.15509   |           |           |          |
| 283 ->289         | 0.16859   |           |           |          |
| 283 ->295         | 0.43823   |           |           |          |
| 285 ->297         | -0.35240  |           |           |          |
| Excited State 18: | Singlet-A | 2.8198 eV | 439.69 nm | f=0.0001 |
| 278 ->296         | 0.10023   |           |           |          |
| 279 ->296         | 0.10986   |           |           |          |
| 280 ->286         | 0.11331   |           |           |          |
| 280 ->287         | -0.13835  |           |           |          |
| 280 ->288         | 0.15001   |           |           |          |
| 280 ->294         | 0.30002   |           |           |          |
| 284 ->292         | 0.12374   |           |           |          |
| 284 ->296         | 0.49125   |           |           |          |

|                   |           |           |           |          |
|-------------------|-----------|-----------|-----------|----------|
| Excited State 19: | Singlet-A | 2.8209 eV | 439.52 nm | f=0.0003 |
| 271 ->289         | 0.11182   |           |           |          |
| 274 ->293         | 0.11625   |           |           |          |
| 276 ->293         | 0.12841   |           |           |          |
| 277 ->290         | 0.12521   |           |           |          |
| 277 ->291         | 0.19341   |           |           |          |
| 277 ->292         | 0.10494   |           |           |          |
| 277 ->293         | 0.45692   |           |           |          |
| 283 ->293         | 0.15506   |           |           |          |
| 283 ->297         | 0.16248   |           |           |          |
| 285 ->286         | 0.11152   |           |           |          |
| 285 ->287         | 0.12222   |           |           |          |
| 285 ->289         | 0.12115   |           |           |          |
| Excited State 20: | Singlet-A | 2.8449 eV | 435.82 nm | f=0.0054 |
| 280 ->296         | 0.34218   |           |           |          |
| 281 ->294         | -0.16631  |           |           |          |
| 284 ->294         | 0.51854   |           |           |          |
| Excited State 21: | Singlet-A | 2.8607 eV | 433.41 nm | f=0.0236 |
| 277 ->286         | 0.16626   |           |           |          |
| 277 ->287         | 0.18120   |           |           |          |
| 277 ->289         | 0.16872   |           |           |          |
| 279 ->290         | -0.11382  |           |           |          |
| 283 ->286         | 0.18503   |           |           |          |
| 283 ->287         | 0.22452   |           |           |          |
| 283 ->288         | 0.12769   |           |           |          |
| 283 ->289         | 0.26328   |           |           |          |
| 283 ->295         | -0.12501  |           |           |          |
| 285 ->290         | 0.10275   |           |           |          |
| 285 ->291         | 0.12731   |           |           |          |
| 285 ->293         | 0.24281   |           |           |          |
| 285 ->297         | 0.16071   |           |           |          |
| Excited State 22: | Singlet-A | 2.8832 eV | 430.02 nm | f=0.0133 |
| 274 ->287         | 0.15518   |           |           |          |
| 276 ->286         | 0.39539   |           |           |          |
| 277 ->286         | -0.13736  |           |           |          |
| 279 ->290         | 0.27668   |           |           |          |
| 280 ->288         | 0.10248   |           |           |          |
| 283 ->286         | 0.10285   |           |           |          |
| 283 ->287         | 0.12767   |           |           |          |
| 283 ->289         | 0.15503   |           |           |          |

|                   |           |           |           |          |
|-------------------|-----------|-----------|-----------|----------|
| 284 ->290         | -0.12780  |           |           |          |
| Excited State 23: | Singlet-A | 2.8901 eV | 429.00 nm | f=0.0001 |
| 272 ->291         | 0.20641   |           |           |          |
| 272 ->292         | 0.12433   |           |           |          |
| 274 ->290         | 0.21926   |           |           |          |
| 274 ->291         | 0.21117   |           |           |          |
| 276 ->290         | 0.27787   |           |           |          |
| 277 ->290         | -0.17155  |           |           |          |
| 277 ->291         | -0.11014  |           |           |          |
| 279 ->286         | 0.11545   |           |           |          |
| 282 ->289         | 0.14109   |           |           |          |
| 285 ->286         | -0.21950  |           |           |          |
| 285 ->289         | 0.15697   |           |           |          |
| Excited State 24: | Singlet-A | 2.9038 eV | 426.98 nm | f=0.0016 |
| 272 ->290         | 0.10185   |           |           |          |
| 272 ->292         | -0.14543  |           |           |          |
| 274 ->292         | 0.13079   |           |           |          |
| 276 ->290         | -0.20361  |           |           |          |
| 276 ->291         | 0.15764   |           |           |          |
| 279 ->287         | 0.10688   |           |           |          |
| 282 ->286         | 0.20883   |           |           |          |
| 282 ->287         | 0.25117   |           |           |          |
| 282 ->288         | 0.14881   |           |           |          |
| 282 ->289         | 0.31726   |           |           |          |
| 282 ->295         | -0.10552  |           |           |          |
| Excited State 25: | Singlet-A | 2.9096 eV | 426.12 nm | f=0.0003 |
| 272 ->290         | -0.12177  |           |           |          |
| 272 ->292         | 0.12446   |           |           |          |
| 274 ->290         | -0.12787  |           |           |          |
| 274 ->292         | -0.18365  |           |           |          |
| 276 ->290         | 0.10801   |           |           |          |
| 276 ->291         | -0.21096  |           |           |          |
| 280 ->292         | -0.13310  |           |           |          |
| 282 ->286         | 0.17103   |           |           |          |
| 282 ->287         | 0.20947   |           |           |          |
| 282 ->288         | 0.11254   |           |           |          |
| 282 ->289         | 0.22847   |           |           |          |
| 284 ->286         | -0.11550  |           |           |          |
| 285 ->286         | 0.10136   |           |           |          |
| 285 ->289         | -0.18286  |           |           |          |

|                   |           |           |           |          |
|-------------------|-----------|-----------|-----------|----------|
| Excited State 26: | Singlet-A | 2.9148 eV | 425.36 nm | f=0.0017 |
| 274 ->286         | -0.18709  |           |           |          |
| 276 ->286         | 0.16009   |           |           |          |
| 276 ->287         | -0.16730  |           |           |          |
| 277 ->286         | 0.13708   |           |           |          |
| 277 ->287         | 0.21520   |           |           |          |
| 277 ->288         | 0.10517   |           |           |          |
| 277 ->289         | 0.14299   |           |           |          |
| 278 ->290         | 0.10273   |           |           |          |
| 279 ->291         | -0.16162  |           |           |          |
| 283 ->286         | -0.15290  |           |           |          |
| 283 ->287         | -0.17463  |           |           |          |
| 283 ->289         | -0.20212  |           |           |          |

|                   |           |           |           |          |
|-------------------|-----------|-----------|-----------|----------|
| Excited State 27: | Singlet-A | 2.9261 eV | 423.72 nm | f=0.0063 |
| 272 ->290         | 0.17068   |           |           |          |
| 274 ->291         | 0.10667   |           |           |          |
| 276 ->290         | -0.10158  |           |           |          |
| 276 ->292         | 0.18214   |           |           |          |
| 279 ->286         | -0.13897  |           |           |          |
| 279 ->287         | 0.10000   |           |           |          |
| 280 ->296         | -0.11284  |           |           |          |
| 281 ->286         | -0.21932  |           |           |          |
| 281 ->287         | 0.25505   |           |           |          |
| 281 ->288         | -0.25483  |           |           |          |
| 281 ->294         | -0.12797  |           |           |          |
| 284 ->286         | -0.11892  |           |           |          |
| 284 ->287         | 0.12997   |           |           |          |
| 284 ->288         | -0.11260  |           |           |          |
| 284 ->294         | -0.10657  |           |           |          |
| 285 ->289         | 0.13882   |           |           |          |

|                   |           |           |           |          |
|-------------------|-----------|-----------|-----------|----------|
| Excited State 28: | Singlet-A | 2.9429 eV | 421.30 nm | f=0.0071 |
| 274 ->286         | 0.26700   |           |           |          |
| 276 ->287         | 0.25794   |           |           |          |
| 277 ->289         | 0.27099   |           |           |          |
| 279 ->290         | 0.11031   |           |           |          |
| 279 ->291         | 0.10508   |           |           |          |
| 283 ->286         | -0.12237  |           |           |          |
| 283 ->287         | -0.12371  |           |           |          |
| 283 ->289         | -0.11816  |           |           |          |
| 285 ->293         | 0.20431   |           |           |          |

|                   |           |           |           |          |
|-------------------|-----------|-----------|-----------|----------|
| Excited State 29: | Singlet-A | 2.9450 eV | 421.00 nm | f=0.0042 |
|-------------------|-----------|-----------|-----------|----------|

|                   |           |           |           |          |  |
|-------------------|-----------|-----------|-----------|----------|--|
| 272 ->290         | -0.12708  |           |           |          |  |
| 272 ->291         | 0.10985   |           |           |          |  |
| 274 ->292         | 0.11150   |           |           |          |  |
| 276 ->292         | -0.20366  |           |           |          |  |
| 279 ->288         | -0.16184  |           |           |          |  |
| 280 ->292         | 0.12800   |           |           |          |  |
| 281 ->286         | -0.22320  |           |           |          |  |
| 281 ->287         | 0.25798   |           |           |          |  |
| 281 ->288         | -0.25433  |           |           |          |  |
| 281 ->294         | -0.12042  |           |           |          |  |
| 285 ->289         | -0.13400  |           |           |          |  |
| Excited State 30: | Singlet-A | 2.9722 eV | 417.15 nm | f=0.0122 |  |
| 273 ->288         | -0.14144  |           |           |          |  |
| 276 ->288         | -0.12786  |           |           |          |  |
| 278 ->288         | 0.10382   |           |           |          |  |
| 279 ->286         | 0.10076   |           |           |          |  |
| 279 ->287         | -0.19531  |           |           |          |  |
| 284 ->286         | 0.45246   |           |           |          |  |
| 284 ->288         | -0.19515  |           |           |          |  |
| Excited State 31: | Singlet-A | 2.9748 eV | 416.78 nm | f=0.0577 |  |
| 272 ->286         | 0.22349   |           |           |          |  |
| 274 ->287         | 0.22185   |           |           |          |  |
| 274 ->288         | -0.11434  |           |           |          |  |
| 276 ->288         | 0.26734   |           |           |          |  |
| 277 ->289         | 0.11604   |           |           |          |  |
| 278 ->290         | -0.10606  |           |           |          |  |
| 279 ->291         | 0.17863   |           |           |          |  |
| 280 ->286         | 0.10035   |           |           |          |  |
| 284 ->286         | 0.20069   |           |           |          |  |
| 284 ->292         | -0.22496  |           |           |          |  |
| 285 ->293         | 0.10149   |           |           |          |  |
| Excited State 32: | Singlet-A | 2.9792 eV | 416.17 nm | f=0.0046 |  |
| 271 ->289         | 0.11924   |           |           |          |  |
| 272 ->290         | 0.16481   |           |           |          |  |
| 274 ->291         | 0.13345   |           |           |          |  |
| 277 ->291         | -0.10666  |           |           |          |  |
| 278 ->286         | -0.10060  |           |           |          |  |
| 279 ->286         | 0.16198   |           |           |          |  |
| 279 ->287         | 0.18177   |           |           |          |  |
| 284 ->288         | -0.14351  |           |           |          |  |
| 285 ->286         | 0.39963   |           |           |          |  |

|                   |           |           |           |          |  |
|-------------------|-----------|-----------|-----------|----------|--|
| 285 ->289         |           | -0.19236  |           |          |  |
| Excited State 33: | Singlet-A | 2.9882 eV | 414.91 nm | f=0.0007 |  |
| 274 ->291         |           | 0.10892   |           |          |  |
| 274 ->292         |           | -0.18553  |           |          |  |
| 276 ->291         |           | -0.11351  |           |          |  |
| 276 ->292         |           | 0.20305   |           |          |  |
| 280 ->290         |           | 0.18281   |           |          |  |
| 280 ->291         |           | -0.27452  |           |          |  |
| 280 ->292         |           | 0.47215   |           |          |  |
| Excited State 34: | Singlet-A | 3.0058 eV | 412.48 nm | f=0.0004 |  |
| 268 ->286         |           | -0.12204  |           |          |  |
| 273 ->286         |           | -0.16445  |           |          |  |
| 273 ->287         |           | 0.15568   |           |          |  |
| 278 ->286         |           | 0.14925   |           |          |  |
| 278 ->287         |           | -0.18884  |           |          |  |
| 279 ->288         |           | 0.31533   |           |          |  |
| 284 ->286         |           | -0.12182  |           |          |  |
| 284 ->287         |           | -0.15956  |           |          |  |
| 284 ->288         |           | 0.31831   |           |          |  |
| 285 ->286         |           | 0.10855   |           |          |  |
| Excited State 35: | Singlet-A | 3.0138 eV | 411.39 nm | f=0.0284 |  |
| 269 ->293         |           | -0.11564  |           |          |  |
| 271 ->293         |           | -0.10767  |           |          |  |
| 275 ->293         |           | 0.16047   |           |          |  |
| 278 ->291         |           | 0.12303   |           |          |  |
| 278 ->293         |           | 0.33998   |           |          |  |
| 279 ->293         |           | -0.33886  |           |          |  |
| 285 ->290         |           | -0.11485  |           |          |  |
| 285 ->291         |           | -0.14538  |           |          |  |
| 285 ->293         |           | -0.23110  |           |          |  |
| Excited State 36: | Singlet-A | 3.0248 eV | 409.90 nm | f=0.0223 |  |
| 271 ->287         |           | -0.13486  |           |          |  |
| 271 ->289         |           | -0.17967  |           |          |  |
| 278 ->289         |           | 0.10242   |           |          |  |
| 279 ->289         |           | -0.21071  |           |          |  |
| 282 ->295         |           | -0.12160  |           |          |  |
| 283 ->290         |           | 0.11368   |           |          |  |
| 283 ->291         |           | 0.17066   |           |          |  |
| 283 ->293         |           | 0.41597   |           |          |  |
| 283 ->297         |           | -0.16444  |           |          |  |

|                   |           |           |           |          |
|-------------------|-----------|-----------|-----------|----------|
| Excited State 37: | Singlet-A | 3.0311 eV | 409.04 nm | f=0.0283 |
| 277 ->293         | -0.17015  |           |           |          |
| 282 ->295         | 0.28509   |           |           |          |
| 283 ->290         | 0.10198   |           |           |          |
| 283 ->291         | 0.14911   |           |           |          |
| 283 ->293         | 0.35057   |           |           |          |
| 283 ->297         | 0.20330   |           |           |          |
| 285 ->295         | 0.29264   |           |           |          |
| Excited State 38: | Singlet-A | 3.0395 eV | 407.91 nm | f=0.0015 |
| 282 ->290         | 0.15999   |           |           |          |
| 282 ->291         | 0.24397   |           |           |          |
| 282 ->292         | 0.13404   |           |           |          |
| 282 ->293         | 0.59903   |           |           |          |
| Excited State 39: | Singlet-A | 3.0494 eV | 406.59 nm | f=0.0006 |
| 283 ->286         | 0.54243   |           |           |          |
| 283 ->288         | -0.11153  |           |           |          |
| 283 ->289         | -0.38827  |           |           |          |
| Excited State 40: | Singlet-A | 3.0588 eV | 405.34 nm | f=0.0052 |
| 272 ->290         | 0.10770   |           |           |          |
| 278 ->288         | 0.12725   |           |           |          |
| 279 ->288         | 0.10724   |           |           |          |
| 279 ->289         | -0.11961  |           |           |          |
| 284 ->286         | -0.13466  |           |           |          |
| 284 ->287         | -0.19705  |           |           |          |
| 285 ->286         | -0.30271  |           |           |          |
| 285 ->287         | 0.32595   |           |           |          |
| 285 ->288         | 0.10643   |           |           |          |
| 285 ->289         | -0.19877  |           |           |          |
| Excited State 41: | Singlet-A | 3.0610 eV | 405.04 nm | f=0.0224 |
| 280 ->294         | -0.29469  |           |           |          |
| 281 ->290         | 0.18205   |           |           |          |
| 281 ->291         | -0.26444  |           |           |          |
| 281 ->292         | 0.44106   |           |           |          |
| 284 ->296         | 0.15137   |           |           |          |
| Excited State 42: | Singlet-A | 3.0668 eV | 404.28 nm | f=0.0079 |
| 271 ->287         | -0.10292  |           |           |          |
| 271 ->289         | -0.17697  |           |           |          |
| 277 ->293         | 0.11582   |           |           |          |

|                   |           |           |           |          |  |
|-------------------|-----------|-----------|-----------|----------|--|
| 278 ->286         | 0.10768   |           |           |          |  |
| 279 ->289         | -0.17015  |           |           |          |  |
| 282 ->295         | 0.17390   |           |           |          |  |
| 283 ->293         | -0.17382  |           |           |          |  |
| 283 ->297         | 0.18167   |           |           |          |  |
| 285 ->287         | -0.22267  |           |           |          |  |
| 285 ->290         | -0.11018  |           |           |          |  |
| 285 ->295         | 0.21864   |           |           |          |  |
| Excited State 43: | Singlet-A | 3.0692 eV | 403.96 nm | f=0.0789 |  |
| 272 ->286         | -0.19839  |           |           |          |  |
| 274 ->286         | 0.13842   |           |           |          |  |
| 274 ->287         | -0.11282  |           |           |          |  |
| 274 ->288         | -0.16599  |           |           |          |  |
| 278 ->292         | -0.11166  |           |           |          |  |
| 279 ->291         | 0.12471   |           |           |          |  |
| 279 ->292         | -0.10368  |           |           |          |  |
| 280 ->286         | 0.13238   |           |           |          |  |
| 280 ->288         | -0.11509  |           |           |          |  |
| 281 ->292         | 0.11595   |           |           |          |  |
| 284 ->290         | -0.15004  |           |           |          |  |
| 285 ->287         | -0.11892  |           |           |          |  |
| 285 ->290         | 0.23278   |           |           |          |  |
| 285 ->291         | 0.17479   |           |           |          |  |
| 285 ->293         | -0.15343  |           |           |          |  |
| Excited State 44: | Singlet-A | 3.0745 eV | 403.27 nm | f=0.0065 |  |
| 272 ->286         | 0.18231   |           |           |          |  |
| 274 ->286         | -0.14039  |           |           |          |  |
| 274 ->288         | 0.13121   |           |           |          |  |
| 275 ->291         | 0.12783   |           |           |          |  |
| 278 ->292         | 0.11302   |           |           |          |  |
| 279 ->290         | 0.12095   |           |           |          |  |
| 279 ->292         | 0.13286   |           |           |          |  |
| 280 ->286         | -0.12986  |           |           |          |  |
| 280 ->288         | 0.10614   |           |           |          |  |
| 284 ->291         | -0.13214  |           |           |          |  |
| 285 ->290         | 0.31279   |           |           |          |  |
| 285 ->291         | 0.24651   |           |           |          |  |
| 285 ->293         | -0.20077  |           |           |          |  |
| Excited State 45: | Singlet-A | 3.0863 eV | 401.73 nm | f=0.0008 |  |
| 278 ->286         | -0.17444  |           |           |          |  |
| 278 ->287         | -0.11726  |           |           |          |  |



|                   |           |           |           |          |  |
|-------------------|-----------|-----------|-----------|----------|--|
| 278 ->289         | 0.14668   |           |           |          |  |
| 279 ->289         | -0.11786  |           |           |          |  |
| 282 ->286         | -0.12474  |           |           |          |  |
| 284 ->286         | 0.18857   |           |           |          |  |
| 284 ->287         | 0.38936   |           |           |          |  |
| 284 ->288         | 0.26383   |           |           |          |  |
| 284 ->289         | -0.17194  |           |           |          |  |
| 285 ->287         | 0.14150   |           |           |          |  |
| 285 ->289         | -0.12692  |           |           |          |  |
| Excited State 46: | Singlet-A | 3.0947 eV | 400.64 nm | f=0.0464 |  |
| 267 ->297         | -0.10217  |           |           |          |  |
| 283 ->295         | 0.39581   |           |           |          |  |
| 285 ->297         | 0.45554   |           |           |          |  |
| Excited State 47: | Singlet-A | 3.0966 eV | 400.39 nm | f=0.0777 |  |
| 272 ->286         | 0.18963   |           |           |          |  |
| 272 ->287         | 0.16647   |           |           |          |  |
| 272 ->289         | -0.10081  |           |           |          |  |
| 275 ->290         | -0.10968  |           |           |          |  |
| 276 ->286         | -0.10693  |           |           |          |  |
| 276 ->289         | 0.13209   |           |           |          |  |
| 278 ->292         | -0.11367  |           |           |          |  |
| 279 ->291         | 0.10279   |           |           |          |  |
| 280 ->294         | 0.22409   |           |           |          |  |
| 281 ->292         | 0.15606   |           |           |          |  |
| 282 ->286         | 0.19243   |           |           |          |  |
| 282 ->289         | -0.13312  |           |           |          |  |
| 284 ->290         | -0.16453  |           |           |          |  |
| 284 ->296         | -0.12628  |           |           |          |  |
| 285 ->297         | -0.10437  |           |           |          |  |
| Excited State 48: | Singlet-A | 3.0993 eV | 400.03 nm | f=0.0070 |  |
| 280 ->294         | -0.14742  |           |           |          |  |
| 282 ->286         | 0.50049   |           |           |          |  |
| 282 ->289         | -0.34466  |           |           |          |  |
| 284 ->287         | 0.11705   |           |           |          |  |
| Excited State 49: | Singlet-A | 3.1034 eV | 399.52 nm | f=0.0309 |  |
| 272 ->286         | -0.10211  |           |           |          |  |
| 272 ->287         | -0.15416  |           |           |          |  |
| 275 ->290         | 0.11236   |           |           |          |  |
| 276 ->286         | 0.10559   |           |           |          |  |
| 276 ->289         | -0.10235  |           |           |          |  |

|                   |           |           |           |          |  |
|-------------------|-----------|-----------|-----------|----------|--|
| 280 ->294         | 0.34845   |           |           |          |  |
| 281 ->291         | -0.13345  |           |           |          |  |
| 281 ->292         | 0.21504   |           |           |          |  |
| 284 ->290         | 0.17314   |           |           |          |  |
| 284 ->292         | -0.10543  |           |           |          |  |
| 284 ->296         | -0.19629  |           |           |          |  |
| Excited State 50: | Singlet-A | 3.1186 eV | 397.56 nm | f=0.0031 |  |
| 273 ->292         | 0.11956   |           |           |          |  |
| 276 ->287         | -0.11925  |           |           |          |  |
| 276 ->288         | 0.11451   |           |           |          |  |
| 278 ->291         | -0.12484  |           |           |          |  |
| 278 ->292         | 0.15886   |           |           |          |  |
| 279 ->291         | -0.10552  |           |           |          |  |
| 279 ->292         | 0.24507   |           |           |          |  |
| 280 ->286         | 0.34826   |           |           |          |  |
| 280 ->288         | -0.24175  |           |           |          |  |
| 280 ->294         | 0.10845   |           |           |          |  |
| 281 ->286         | -0.10625  |           |           |          |  |
| 284 ->292         | 0.14305   |           |           |          |  |
| Excited State 51: | Singlet-A | 3.1285 eV | 396.30 nm | f=0.0078 |  |
| 270 ->290         | 0.10289   |           |           |          |  |
| 272 ->286         | 0.10923   |           |           |          |  |
| 272 ->287         | 0.19801   |           |           |          |  |
| 272 ->288         | 0.10236   |           |           |          |  |
| 274 ->286         | 0.11552   |           |           |          |  |
| 274 ->289         | 0.18488   |           |           |          |  |
| 275 ->291         | -0.17794  |           |           |          |  |
| 276 ->287         | -0.10641  |           |           |          |  |
| 276 ->289         | 0.22540   |           |           |          |  |
| 278 ->290         | -0.15657  |           |           |          |  |
| 279 ->290         | 0.11406   |           |           |          |  |
| 279 ->292         | -0.15114  |           |           |          |  |
| 284 ->290         | 0.18004   |           |           |          |  |
| 284 ->292         | -0.15027  |           |           |          |  |
| 285 ->291         | 0.13721   |           |           |          |  |
| Excited State 52: | Singlet-A | 3.1326 eV | 395.78 nm | f=0.0036 |  |
| 268 ->286         | -0.14832  |           |           |          |  |
| 268 ->287         | 0.10105   |           |           |          |  |
| 278 ->286         | 0.11847   |           |           |          |  |
| 278 ->288         | -0.16502  |           |           |          |  |
| 280 ->296         | 0.38467   |           |           |          |  |

|                   |           |           |           |          |  |
|-------------------|-----------|-----------|-----------|----------|--|
| 284 ->287         | 0.10465   |           |           |          |  |
| 284 ->294         | -0.25595  |           |           |          |  |
| 285 ->287         | 0.17647   |           |           |          |  |
| 285 ->288         | -0.11866  |           |           |          |  |
| Excited State 53: | Singlet-A | 3.1340 eV | 395.62 nm | f=0.0039 |  |
| 278 ->286         | 0.20652   |           |           |          |  |
| 278 ->288         | -0.10816  |           |           |          |  |
| 279 ->287         | 0.15859   |           |           |          |  |
| 280 ->296         | -0.16659  |           |           |          |  |
| 281 ->286         | 0.40100   |           |           |          |  |
| 281 ->288         | -0.30503  |           |           |          |  |
| 284 ->286         | 0.11300   |           |           |          |  |
| 284 ->294         | 0.10009   |           |           |          |  |
| 285 ->287         | 0.10163   |           |           |          |  |
| Excited State 54: | Singlet-A | 3.1383 eV | 395.07 nm | f=0.0063 |  |
| 278 ->286         | -0.20306  |           |           |          |  |
| 279 ->287         | -0.16396  |           |           |          |  |
| 280 ->296         | 0.24978   |           |           |          |  |
| 281 ->286         | 0.34703   |           |           |          |  |
| 281 ->288         | -0.27813  |           |           |          |  |
| 284 ->294         | -0.16464  |           |           |          |  |
| Excited State 55: | Singlet-A | 3.1418 eV | 394.62 nm | f=0.0003 |  |
| 277 ->289         | -0.11080  |           |           |          |  |
| 283 ->286         | -0.27144  |           |           |          |  |
| 283 ->287         | 0.49660   |           |           |          |  |
| 283 ->288         | 0.11143   |           |           |          |  |
| 283 ->289         | -0.29394  |           |           |          |  |
| Excited State 56: | Singlet-A | 3.1449 eV | 394.24 nm | f=0.1145 |  |
| 272 ->289         | 0.26955   |           |           |          |  |
| 274 ->287         | 0.15813   |           |           |          |  |
| 274 ->288         | 0.10989   |           |           |          |  |
| 274 ->289         | 0.24503   |           |           |          |  |
| 275 ->290         | -0.15067  |           |           |          |  |
| 275 ->291         | -0.12067  |           |           |          |  |
| 276 ->286         | 0.10748   |           |           |          |  |
| 276 ->287         | 0.21059   |           |           |          |  |
| 276 ->288         | 0.13494   |           |           |          |  |
| 277 ->286         | 0.10639   |           |           |          |  |
| 277 ->289         | -0.10541  |           |           |          |  |
| 278 ->291         | -0.10928  |           |           |          |  |

|                   |           |           |           |          |  |
|-------------------|-----------|-----------|-----------|----------|--|
| 279 ->290         | -0.10322  |           |           |          |  |
| 284 ->290         | -0.13270  |           |           |          |  |
| 284 ->291         | 0.10988   |           |           |          |  |
| 284 ->292         | 0.10918   |           |           |          |  |
| 285 ->290         | 0.15212   |           |           |          |  |
| Excited State 57: | Singlet-A | 3.1565 eV | 392.80 nm | f=0.0141 |  |
| 273 ->292         | -0.10939  |           |           |          |  |
| 274 ->286         | -0.17275  |           |           |          |  |
| 274 ->288         | 0.24603   |           |           |          |  |
| 276 ->287         | 0.13306   |           |           |          |  |
| 276 ->288         | -0.16429  |           |           |          |  |
| 278 ->292         | -0.11841  |           |           |          |  |
| 279 ->292         | -0.12576  |           |           |          |  |
| 280 ->286         | 0.32668   |           |           |          |  |
| 280 ->288         | -0.23979  |           |           |          |  |
| 284 ->290         | 0.10310   |           |           |          |  |
| 284 ->292         | -0.10500  |           |           |          |  |
| Excited State 58: | Singlet-A | 3.1569 eV | 392.74 nm | f=0.0151 |  |
| 269 ->290         | -0.14429  |           |           |          |  |
| 269 ->291         | -0.13552  |           |           |          |  |
| 274 ->286         | -0.10689  |           |           |          |  |
| 274 ->289         | -0.14767  |           |           |          |  |
| 275 ->290         | -0.20734  |           |           |          |  |
| 275 ->291         | -0.18098  |           |           |          |  |
| 275 ->293         | 0.10439   |           |           |          |  |
| 277 ->286         | -0.20518  |           |           |          |  |
| 277 ->287         | -0.12197  |           |           |          |  |
| 277 ->289         | 0.22027   |           |           |          |  |
| 278 ->290         | -0.11030  |           |           |          |  |
| 278 ->291         | -0.11573  |           |           |          |  |
| 283 ->287         | 0.19100   |           |           |          |  |
| 283 ->289         | -0.13084  |           |           |          |  |
| 285 ->290         | 0.13437   |           |           |          |  |
| Excited State 59: | Singlet-A | 3.1600 eV | 392.35 nm | f=0.0075 |  |
| 268 ->286         | 0.10747   |           |           |          |  |
| 269 ->286         | -0.10844  |           |           |          |  |
| 269 ->287         | -0.14651  |           |           |          |  |
| 275 ->287         | 0.13878   |           |           |          |  |
| 278 ->286         | 0.18511   |           |           |          |  |
| 278 ->288         | 0.10780   |           |           |          |  |
| 278 ->289         | -0.14124  |           |           |          |  |

|                   |           |           |           |          |  |
|-------------------|-----------|-----------|-----------|----------|--|
| 279 ->287         | 0.16159   |           |           |          |  |
| 280 ->296         | 0.15636   |           |           |          |  |
| 284 ->287         | 0.11519   |           |           |          |  |
| 285 ->287         | -0.20664  |           |           |          |  |
| 285 ->288         | 0.38896   |           |           |          |  |
| Excited State 60: | Singlet-A | 3.1644 eV | 391.81 nm | f=0.0007 |  |
| 268 ->286         | -0.12197  |           |           |          |  |
| 269 ->286         | 0.17990   |           |           |          |  |
| 269 ->289         | -0.10683  |           |           |          |  |
| 272 ->290         | -0.12157  |           |           |          |  |
| 275 ->286         | -0.16328  |           |           |          |  |
| 278 ->287         | -0.21438  |           |           |          |  |
| 278 ->289         | 0.14935   |           |           |          |  |
| 279 ->288         | -0.14352  |           |           |          |  |
| 284 ->287         | -0.14213  |           |           |          |  |
| 285 ->288         | 0.34705   |           |           |          |  |
| 285 ->289         | -0.14234  |           |           |          |  |
| Excited State 61: | Singlet-A | 3.1668 eV | 391.51 nm | f=0.0502 |  |
| 273 ->290         | 0.15934   |           |           |          |  |
| 273 ->292         | -0.10856  |           |           |          |  |
| 275 ->290         | -0.14690  |           |           |          |  |
| 276 ->288         | 0.13494   |           |           |          |  |
| 278 ->290         | 0.18496   |           |           |          |  |
| 278 ->291         | -0.14733  |           |           |          |  |
| 280 ->286         | -0.13594  |           |           |          |  |
| 284 ->290         | 0.33943   |           |           |          |  |
| 284 ->291         | -0.11693  |           |           |          |  |
| 284 ->292         | -0.18523  |           |           |          |  |
| 285 ->290         | 0.14335   |           |           |          |  |
| 285 ->291         | -0.11902  |           |           |          |  |
| Excited State 62: | Singlet-A | 3.1858 eV | 389.18 nm | f=0.0725 |  |
| 271 ->291         | -0.14159  |           |           |          |  |
| 271 ->293         | -0.29546  |           |           |          |  |
| 275 ->293         | -0.11520  |           |           |          |  |
| 282 ->297         | 0.42203   |           |           |          |  |
| 283 ->295         | 0.15422   |           |           |          |  |
| 285 ->290         | -0.12332  |           |           |          |  |
| Excited State 63: | Singlet-A | 3.1880 eV | 388.91 nm | f=0.0050 |  |
| 268 ->290         | 0.11441   |           |           |          |  |
| 270 ->290         | -0.13105  |           |           |          |  |

|                   |           |           |           |          |  |
|-------------------|-----------|-----------|-----------|----------|--|
| 270 ->291         | 0.10766   |           |           |          |  |
| 275 ->290         | -0.16484  |           |           |          |  |
| 282 ->297         | -0.13173  |           |           |          |  |
| 285 ->290         | -0.32477  |           |           |          |  |
| 285 ->291         | 0.34120   |           |           |          |  |
| 285 ->292         | 0.17152   |           |           |          |  |
| Excited State 64: | Singlet-A | 3.1940 eV | 388.18 nm | f=0.0072 |  |
| 268 ->286         | -0.12172  |           |           |          |  |
| 268 ->287         | 0.11143   |           |           |          |  |
| 268 ->288         | -0.10162  |           |           |          |  |
| 269 ->286         | -0.10010  |           |           |          |  |
| 269 ->287         | 0.11758   |           |           |          |  |
| 269 ->288         | -0.11609  |           |           |          |  |
| 275 ->287         | -0.13551  |           |           |          |  |
| 275 ->288         | 0.18934   |           |           |          |  |
| 279 ->287         | -0.10541  |           |           |          |  |
| 279 ->288         | 0.20635   |           |           |          |  |
| 280 ->296         | -0.11938  |           |           |          |  |
| 282 ->287         | 0.12975   |           |           |          |  |
| 283 ->290         | -0.12898  |           |           |          |  |
| 284 ->287         | 0.10853   |           |           |          |  |
| 285 ->287         | -0.10811  |           |           |          |  |
| 285 ->288         | 0.28741   |           |           |          |  |
| Excited State 65: | Singlet-A | 3.1946 eV | 388.10 nm | f=0.0005 |  |
| 283 ->290         | 0.49926   |           |           |          |  |
| 283 ->291         | 0.34221   |           |           |          |  |
| 283 ->293         | -0.28750  |           |           |          |  |
| Excited State 66: | Singlet-A | 3.1973 eV | 387.78 nm | f=0.0032 |  |
| 274 ->290         | 0.13243   |           |           |          |  |
| 274 ->292         | -0.10426  |           |           |          |  |
| 282 ->286         | -0.23678  |           |           |          |  |
| 282 ->287         | 0.43863   |           |           |          |  |
| 282 ->288         | 0.11427   |           |           |          |  |
| 282 ->289         | -0.26093  |           |           |          |  |
| 285 ->288         | -0.10211  |           |           |          |  |
| Excited State 67: | Singlet-A | 3.1983 eV | 387.66 nm | f=0.0017 |  |
| 274 ->290         | -0.10995  |           |           |          |  |
| 275 ->286         | -0.10833  |           |           |          |  |
| 278 ->289         | -0.12011  |           |           |          |  |
| 279 ->288         | -0.10046  |           |           |          |  |

|                   |           |           |           |          |  |
|-------------------|-----------|-----------|-----------|----------|--|
| 279 ->289         | -0.15385  |           |           |          |  |
| 282 ->287         | 0.10952   |           |           |          |  |
| 282 ->297         | -0.14362  |           |           |          |  |
| 284 ->287         | 0.13366   |           |           |          |  |
| 284 ->288         | 0.16356   |           |           |          |  |
| 284 ->289         | 0.42977   |           |           |          |  |
| Excited State 68: | Singlet-A | 3.2002 eV | 387.43 nm | f=0.0093 |  |
| 271 ->291         | 0.13013   |           |           |          |  |
| 271 ->293         | 0.31627   |           |           |          |  |
| 275 ->293         | 0.12617   |           |           |          |  |
| 277 ->289         | -0.11367  |           |           |          |  |
| 282 ->287         | 0.10518   |           |           |          |  |
| 282 ->297         | 0.34485   |           |           |          |  |
| 284 ->289         | 0.17412   |           |           |          |  |
| 285 ->297         | -0.13406  |           |           |          |  |
| Excited State 69: | Singlet-A | 3.2050 eV | 386.85 nm | f=0.0033 |  |
| 272 ->291         | -0.12017  |           |           |          |  |
| 274 ->290         | -0.19550  |           |           |          |  |
| 274 ->291         | 0.13863   |           |           |          |  |
| 274 ->292         | 0.16574   |           |           |          |  |
| 276 ->290         | 0.21204   |           |           |          |  |
| 276 ->292         | -0.12540  |           |           |          |  |
| 278 ->289         | 0.12550   |           |           |          |  |
| 280 ->290         | -0.16628  |           |           |          |  |
| 280 ->292         | 0.12129   |           |           |          |  |
| 282 ->286         | -0.11143  |           |           |          |  |
| 282 ->287         | 0.22384   |           |           |          |  |
| 282 ->289         | -0.13303  |           |           |          |  |
| 284 ->288         | -0.10897  |           |           |          |  |
| 284 ->289         | -0.21673  |           |           |          |  |
| Excited State 70: | Singlet-A | 3.2181 eV | 385.27 nm | f=0.0037 |  |
| 272 ->290         | -0.24857  |           |           |          |  |
| 272 ->291         | -0.23198  |           |           |          |  |
| 272 ->293         | 0.16477   |           |           |          |  |
| 276 ->290         | 0.15969   |           |           |          |  |
| 276 ->291         | 0.29043   |           |           |          |  |
| 276 ->293         | -0.10322  |           |           |          |  |
| 277 ->286         | -0.11870  |           |           |          |  |
| 278 ->287         | 0.18252   |           |           |          |  |
| 279 ->286         | 0.13104   |           |           |          |  |
| 279 ->287         | 0.11063   |           |           |          |  |

|                   |           |           |           |          |
|-------------------|-----------|-----------|-----------|----------|
| Excited State 71: | Singlet-A | 3.2237 eV | 384.60 nm | f=0.0375 |
| 271 ->293         | -0.14451  |           |           |          |
| 272 ->289         | -0.16807  |           |           |          |
| 273 ->292         | -0.12286  |           |           |          |
| 274 ->289         | -0.20705  |           |           |          |
| 276 ->289         | -0.11797  |           |           |          |
| 277 ->286         | 0.28121   |           |           |          |
| 277 ->287         | 0.11746   |           |           |          |
| 277 ->289         | -0.15704  |           |           |          |
| 279 ->292         | 0.10600   |           |           |          |
| 281 ->296         | -0.14099  |           |           |          |

|                   |           |           |           |          |
|-------------------|-----------|-----------|-----------|----------|
| Excited State 72: | Singlet-A | 3.2248 eV | 384.47 nm | f=0.0186 |
| 273 ->291         | 0.10824   |           |           |          |
| 273 ->292         | -0.17144  |           |           |          |
| 274 ->289         | 0.10648   |           |           |          |
| 275 ->291         | 0.12336   |           |           |          |
| 277 ->286         | -0.15930  |           |           |          |
| 279 ->292         | 0.13411   |           |           |          |
| 281 ->296         | -0.18994  |           |           |          |
| 284 ->290         | 0.26017   |           |           |          |
| 284 ->291         | 0.30988   |           |           |          |
| 284 ->292         | 0.16059   |           |           |          |
| 284 ->293         | -0.10391  |           |           |          |

|                   |           |           |           |          |
|-------------------|-----------|-----------|-----------|----------|
| Excited State 73: | Singlet-A | 3.2262 eV | 384.31 nm | f=0.0122 |
| 273 ->291         | -0.12430  |           |           |          |
| 273 ->292         | 0.20309   |           |           |          |
| 279 ->292         | -0.13570  |           |           |          |
| 281 ->296         | 0.28242   |           |           |          |
| 284 ->290         | 0.20960   |           |           |          |
| 284 ->291         | 0.38449   |           |           |          |

|                   |           |           |           |          |
|-------------------|-----------|-----------|-----------|----------|
| Excited State 74: | Singlet-A | 3.2297 eV | 383.89 nm | f=0.0000 |
| 283 ->287         | -0.21531  |           |           |          |
| 283 ->288         | 0.64860   |           |           |          |
| 283 ->289         | -0.16236  |           |           |          |

|                   |           |           |           |          |
|-------------------|-----------|-----------|-----------|----------|
| Excited State 75: | Singlet-A | 3.2318 eV | 383.64 nm | f=0.0090 |
| 273 ->291         | 0.12728   |           |           |          |
| 273 ->292         | -0.21248  |           |           |          |
| 279 ->292         | 0.15418   |           |           |          |
| 281 ->296         | 0.49677   |           |           |          |



|                   |           |           |           |          |  |
|-------------------|-----------|-----------|-----------|----------|--|
| 284 ->311         | -0.11335  |           |           |          |  |
| Excited State 76: | Singlet-A | 3.2405 eV | 382.60 nm | f=0.0001 |  |
| 280 ->287         | -0.12435  |           |           |          |  |
| 281 ->286         | 0.24132   |           |           |          |  |
| 281 ->287         | 0.52131   |           |           |          |  |
| 281 ->288         | 0.29712   |           |           |          |  |
| 281 ->289         | -0.21360  |           |           |          |  |
| Excited State 77: | Singlet-A | 3.2424 eV | 382.38 nm | f=0.0009 |  |
| 270 ->287         | 0.12926   |           |           |          |  |
| 270 ->289         | -0.15746  |           |           |          |  |
| 275 ->286         | 0.32568   |           |           |          |  |
| 275 ->289         | 0.13036   |           |           |          |  |
| 276 ->291         | 0.11465   |           |           |          |  |
| 278 ->287         | -0.19971  |           |           |          |  |
| 278 ->289         | 0.13494   |           |           |          |  |
| 279 ->286         | -0.11031  |           |           |          |  |
| 279 ->289         | 0.18694   |           |           |          |  |
| 284 ->289         | 0.27554   |           |           |          |  |
| Excited State 78: | Singlet-A | 3.2432 eV | 382.29 nm | f=0.0005 |  |
| 282 ->290         | 0.50700   |           |           |          |  |
| 282 ->291         | 0.36014   |           |           |          |  |
| 282 ->293         | -0.28744  |           |           |          |  |
| Excited State 79: | Singlet-A | 3.2491 eV | 381.59 nm | f=0.0031 |  |
| 272 ->290         | 0.10728   |           |           |          |  |
| 272 ->291         | 0.14639   |           |           |          |  |
| 272 ->293         | 0.14268   |           |           |          |  |
| 274 ->293         | 0.27233   |           |           |          |  |
| 275 ->286         | -0.12250  |           |           |          |  |
| 275 ->288         | 0.11434   |           |           |          |  |
| 275 ->289         | 0.13684   |           |           |          |  |
| 276 ->293         | 0.19564   |           |           |          |  |
| 277 ->293         | -0.12566  |           |           |          |  |
| 279 ->289         | 0.20102   |           |           |          |  |
| 280 ->286         | 0.10793   |           |           |          |  |
| 280 ->287         | 0.22194   |           |           |          |  |
| 280 ->288         | 0.12230   |           |           |          |  |
| 284 ->289         | 0.16003   |           |           |          |  |
| Excited State 80: | Singlet-A | 3.2497 eV | 381.53 nm | f=0.0012 |  |
| 274 ->293         | -0.12021  |           |           |          |  |

|                   |           |           |           |          |  |
|-------------------|-----------|-----------|-----------|----------|--|
| 280 ->286         | 0.22892   |           |           |          |  |
| 280 ->287         | 0.46524   |           |           |          |  |
| 280 ->288         | 0.25372   |           |           |          |  |
| 280 ->289         | -0.20271  |           |           |          |  |
| 281 ->287         | 0.11586   |           |           |          |  |
| Excited State 81: | Singlet-A | 3.2611 eV | 380.19 nm | f=0.0018 |  |
| 268 ->291         | -0.10972  |           |           |          |  |
| 268 ->292         | 0.14644   |           |           |          |  |
| 269 ->292         | 0.16323   |           |           |          |  |
| 273 ->291         | 0.14075   |           |           |          |  |
| 273 ->292         | -0.22700  |           |           |          |  |
| 275 ->291         | 0.10562   |           |           |          |  |
| 275 ->292         | -0.18726  |           |           |          |  |
| 278 ->292         | 0.15235   |           |           |          |  |
| 279 ->292         | -0.19871  |           |           |          |  |
| 284 ->292         | 0.17948   |           |           |          |  |
| 285 ->291         | -0.14049  |           |           |          |  |
| 285 ->292         | 0.33265   |           |           |          |  |
| Excited State 82: | Singlet-A | 3.2626 eV | 380.02 nm | f=0.0005 |  |
| 269 ->286         | -0.17630  |           |           |          |  |
| 270 ->286         | 0.31727   |           |           |          |  |
| 274 ->293         | -0.13997  |           |           |          |  |
| 275 ->287         | 0.29503   |           |           |          |  |
| 275 ->288         | 0.21965   |           |           |          |  |
| 275 ->289         | -0.13946  |           |           |          |  |
| 279 ->289         | 0.10670   |           |           |          |  |
| 280 ->290         | -0.10823  |           |           |          |  |
| Excited State 83: | Singlet-A | 3.2655 eV | 379.68 nm | f=0.0045 |  |
| 268 ->290         | 0.17894   |           |           |          |  |
| 268 ->291         | -0.12688  |           |           |          |  |
| 268 ->292         | -0.17563  |           |           |          |  |
| 270 ->290         | -0.17065  |           |           |          |  |
| 270 ->291         | 0.10364   |           |           |          |  |
| 278 ->290         | -0.21881  |           |           |          |  |
| 278 ->291         | 0.16002   |           |           |          |  |
| 278 ->292         | 0.11966   |           |           |          |  |
| 279 ->290         | 0.20767   |           |           |          |  |
| 279 ->291         | -0.19249  |           |           |          |  |
| 285 ->290         | 0.22701   |           |           |          |  |
| 285 ->291         | -0.22513  |           |           |          |  |

|                   |           |           |           |          |
|-------------------|-----------|-----------|-----------|----------|
| Excited State 84: | Singlet-A | 3.2707 eV | 379.07 nm | f=0.0005 |
| 269 ->286         | 0.10147   |           |           |          |
| 270 ->286         | -0.14884  |           |           |          |
| 271 ->286         | -0.23254  |           |           |          |
| 271 ->287         | -0.17515  |           |           |          |
| 272 ->293         | -0.20607  |           |           |          |
| 274 ->293         | -0.24747  |           |           |          |
| 275 ->289         | 0.28128   |           |           |          |
| 276 ->291         | -0.11595  |           |           |          |
| 276 ->293         | -0.10564  |           |           |          |
| 277 ->293         | 0.14044   |           |           |          |
| 278 ->289         | 0.11807   |           |           |          |
| 279 ->289         | 0.14432   |           |           |          |
| Excited State 85: | Singlet-A | 3.2748 eV | 378.60 nm | f=0.0001 |
| 283 ->290         | -0.43003  |           |           |          |
| 283 ->291         | 0.49554   |           |           |          |
| 283 ->292         | 0.19565   |           |           |          |
| 283 ->293         | -0.13197  |           |           |          |
| Excited State 86: | Singlet-A | 3.2793 eV | 378.08 nm | f=0.0022 |
| 272 ->286         | 0.21764   |           |           |          |
| 272 ->287         | -0.17124  |           |           |          |
| 272 ->288         | -0.21809  |           |           |          |
| 272 ->289         | 0.10421   |           |           |          |
| 274 ->286         | 0.19465   |           |           |          |
| 274 ->287         | -0.18656  |           |           |          |
| 274 ->288         | -0.11406  |           |           |          |
| 276 ->286         | 0.12249   |           |           |          |
| 277 ->286         | -0.20150  |           |           |          |
| 277 ->287         | 0.22592   |           |           |          |
| 277 ->288         | 0.13205   |           |           |          |
| 277 ->289         | -0.12344  |           |           |          |
| 281 ->290         | -0.18979  |           |           |          |
| 281 ->292         | 0.12194   |           |           |          |
| Excited State 87: | Singlet-A | 3.2814 eV | 377.83 nm | f=0.0004 |
| 281 ->290         | 0.50736   |           |           |          |
| 281 ->291         | -0.20682  |           |           |          |
| 281 ->292         | -0.33343  |           |           |          |
| Excited State 88: | Singlet-A | 3.2861 eV | 377.29 nm | f=0.0012 |
| 270 ->286         | -0.11151  |           |           |          |
| 270 ->287         | 0.14901   |           |           |          |

|                   |           |           |           |          |  |
|-------------------|-----------|-----------|-----------|----------|--|
| 270 ->288         | -0.21481  |           |           |          |  |
| 273 ->286         | 0.10252   |           |           |          |  |
| 275 ->288         | -0.12222  |           |           |          |  |
| 278 ->288         | 0.12481   |           |           |          |  |
| 282 ->287         | -0.16795  |           |           |          |  |
| 282 ->288         | 0.48441   |           |           |          |  |
| 282 ->289         | -0.11731  |           |           |          |  |
| Excited State 89: | Singlet-A | 3.2903 eV | 376.82 nm | f=0.0012 |  |
| 269 ->286         | 0.11558   |           |           |          |  |
| 270 ->287         | -0.15616  |           |           |          |  |
| 270 ->288         | 0.25157   |           |           |          |  |
| 273 ->286         | -0.10256  |           |           |          |  |
| 275 ->287         | -0.13756  |           |           |          |  |
| 275 ->288         | 0.14596   |           |           |          |  |
| 278 ->288         | -0.12457  |           |           |          |  |
| 280 ->290         | -0.11637  |           |           |          |  |
| 282 ->287         | -0.14512  |           |           |          |  |
| 282 ->288         | 0.42381   |           |           |          |  |
| 282 ->289         | -0.10450  |           |           |          |  |
| Excited State 90: | Singlet-A | 3.2917 eV | 376.65 nm | f=0.0000 |  |
| 270 ->286         | 0.12278   |           |           |          |  |
| 274 ->290         | -0.13862  |           |           |          |  |
| 276 ->290         | 0.13059   |           |           |          |  |
| 280 ->290         | 0.46608   |           |           |          |  |
| 280 ->291         | -0.19528  |           |           |          |  |
| 280 ->292         | -0.29870  |           |           |          |  |
| Excited State 91: | Singlet-A | 3.2953 eV | 376.24 nm | f=0.0002 |  |
| 268 ->291         | 0.11037   |           |           |          |  |
| 269 ->292         | -0.12808  |           |           |          |  |
| 275 ->292         | 0.11389   |           |           |          |  |
| 279 ->292         | 0.19038   |           |           |          |  |
| 284 ->292         | -0.14541  |           |           |          |  |
| 285 ->291         | -0.16867  |           |           |          |  |
| 285 ->292         | 0.54621   |           |           |          |  |
| Excited State 92: | Singlet-A | 3.2999 eV | 375.72 nm | f=0.0018 |  |
| 269 ->286         | 0.15367   |           |           |          |  |
| 270 ->286         | 0.15772   |           |           |          |  |
| 270 ->287         | -0.10277  |           |           |          |  |
| 270 ->288         | -0.12131  |           |           |          |  |
| 273 ->286         | 0.43392   |           |           |          |  |

|                   |           |           |           |          |  |
|-------------------|-----------|-----------|-----------|----------|--|
| 273 ->288         | -0.37951  |           |           |          |  |
| 284 ->288         | 0.10113   |           |           |          |  |
| Excited State 93: | Singlet-A | 3.3041 eV | 375.24 nm | f=0.0003 |  |
| 271 ->286         | -0.39303  |           |           |          |  |
| 271 ->287         | -0.20530  |           |           |          |  |
| 271 ->289         | 0.40886   |           |           |          |  |
| Excited State 94: | Singlet-A | 3.3146 eV | 374.05 nm | f=0.0020 |  |
| 268 ->290         | 0.10183   |           |           |          |  |
| 269 ->290         | -0.21222  |           |           |          |  |
| 269 ->291         | -0.20507  |           |           |          |  |
| 269 ->293         | 0.11151   |           |           |          |  |
| 275 ->293         | -0.11967  |           |           |          |  |
| 278 ->290         | 0.20190   |           |           |          |  |
| 278 ->291         | 0.22450   |           |           |          |  |
| 278 ->293         | -0.20394  |           |           |          |  |
| 284 ->291         | 0.16123   |           |           |          |  |
| 284 ->293         | 0.32054   |           |           |          |  |
| Excited State 95: | Singlet-A | 3.3181 eV | 373.66 nm | f=0.0016 |  |
| 269 ->290         | 0.15411   |           |           |          |  |
| 269 ->291         | 0.14766   |           |           |          |  |
| 278 ->290         | -0.13899  |           |           |          |  |
| 278 ->291         | -0.16740  |           |           |          |  |
| 279 ->293         | -0.18788  |           |           |          |  |
| 284 ->293         | 0.51438   |           |           |          |  |
| Excited State 96: | Singlet-A | 3.3210 eV | 373.33 nm | f=0.0016 |  |
| 272 ->286         | 0.12789   |           |           |          |  |
| 272 ->287         | -0.26234  |           |           |          |  |
| 272 ->288         | 0.30662   |           |           |          |  |
| 274 ->287         | 0.10418   |           |           |          |  |
| 274 ->288         | -0.23436  |           |           |          |  |
| 276 ->286         | -0.11512  |           |           |          |  |
| 276 ->287         | 0.22982   |           |           |          |  |
| 276 ->288         | -0.30352  |           |           |          |  |
| 277 ->288         | 0.13917   |           |           |          |  |
| Excited State 97: | Singlet-A | 3.3313 eV | 372.18 nm | f=0.0000 |  |
| 282 ->290         | -0.42476  |           |           |          |  |
| 282 ->291         | 0.48702   |           |           |          |  |
| 282 ->292         | 0.19882   |           |           |          |  |
| 282 ->293         | -0.12980  |           |           |          |  |

|                    |           |           |           |          |
|--------------------|-----------|-----------|-----------|----------|
| Excited State 98:  | Singlet-A | 3.3406 eV | 371.15 nm | f=0.0001 |
| 274 ->290          | 0.12875   |           |           |          |
| 274 ->291          | 0.12808   |           |           |          |
| 276 ->290          | 0.11562   |           |           |          |
| 276 ->291          | 0.10776   |           |           |          |
| 277 ->290          | 0.42435   |           |           |          |
| 277 ->291          | 0.37065   |           |           |          |
| 277 ->293          | -0.23414  |           |           |          |
| Excited State 99:  | Singlet-A | 3.3440 eV | 370.76 nm | f=0.0000 |
| 281 ->289          | 0.16830   |           |           |          |
| 283 ->291          | -0.20612  |           |           |          |
| 283 ->292          | 0.64075   |           |           |          |
| Excited State 100: | Singlet-A | 3.3440 eV | 370.76 nm | f=0.0000 |
| 281 ->287          | 0.14175   |           |           |          |
| 281 ->288          | 0.18399   |           |           |          |
| 281 ->289          | 0.63694   |           |           |          |
| 283 ->292          | -0.16887  |           |           |          |
| Excited State 101: | Singlet-A | 3.3587 eV | 369.14 nm | f=0.0000 |
| 280 ->287          | 0.16109   |           |           |          |
| 280 ->288          | 0.19622   |           |           |          |
| 280 ->289          | 0.65173   |           |           |          |
| Excited State 102: | Singlet-A | 3.3647 eV | 368.49 nm | f=0.0001 |
| 268 ->290          | -0.11231  |           |           |          |
| 268 ->291          | -0.11129  |           |           |          |
| 268 ->293          | 0.12547   |           |           |          |
| 270 ->290          | -0.11389  |           |           |          |
| 270 ->291          | -0.13544  |           |           |          |
| 273 ->291          | 0.10080   |           |           |          |
| 275 ->290          | -0.15918  |           |           |          |
| 275 ->291          | -0.16832  |           |           |          |
| 275 ->293          | 0.27441   |           |           |          |
| 278 ->290          | 0.16183   |           |           |          |
| 278 ->291          | 0.20640   |           |           |          |
| 279 ->290          | 0.20789   |           |           |          |
| 279 ->291          | 0.27421   |           |           |          |
| 279 ->293          | 0.11261   |           |           |          |
| 284 ->291          | 0.12835   |           |           |          |
| Excited State 103: | Singlet-A | 3.3722 eV | 367.67 nm | f=0.0000 |

|                    |           |           |           |          |
|--------------------|-----------|-----------|-----------|----------|
| 279 ->293          | -0.10391  |           |           |          |
| 280 ->291          | -0.10934  |           |           |          |
| 281 ->290          | 0.34247   |           |           |          |
| 281 ->291          | 0.52685   |           |           |          |
| 281 ->292          | 0.16340   |           |           |          |
| 281 ->293          | -0.14295  |           |           |          |
| Excited State 104: | Singlet-A | 3.3736 eV | 367.52 nm | f=0.0001 |
| 268 ->291          | 0.10122   |           |           |          |
| 270 ->293          | -0.11313  |           |           |          |
| 275 ->290          | 0.14326   |           |           |          |
| 275 ->291          | 0.20746   |           |           |          |
| 275 ->293          | 0.23084   |           |           |          |
| 278 ->293          | 0.14254   |           |           |          |
| 279 ->293          | 0.41092   |           |           |          |
| 281 ->291          | 0.11228   |           |           |          |
| 284 ->293          | 0.27480   |           |           |          |
| Excited State 105: | Singlet-A | 3.3739 eV | 367.48 nm | f=0.0015 |
| 268 ->286          | -0.21544  |           |           |          |
| 268 ->287          | -0.22959  |           |           |          |
| 268 ->289          | 0.15018   |           |           |          |
| 269 ->286          | 0.18010   |           |           |          |
| 270 ->286          | 0.19322   |           |           |          |
| 270 ->287          | 0.31416   |           |           |          |
| 270 ->289          | -0.20727  |           |           |          |
| 273 ->286          | -0.11176  |           |           |          |
| 273 ->287          | -0.16075  |           |           |          |
| 278 ->287          | 0.11192   |           |           |          |
| 279 ->286          | 0.13928   |           |           |          |
| Excited State 106: | Singlet-A | 3.3821 eV | 366.59 nm | f=0.0000 |
| 278 ->288          | 0.10084   |           |           |          |
| 280 ->290          | 0.33524   |           |           |          |
| 280 ->291          | 0.49941   |           |           |          |
| 280 ->292          | 0.14563   |           |           |          |
| 280 ->293          | -0.13826  |           |           |          |
| 281 ->291          | 0.10918   |           |           |          |
| Excited State 107: | Singlet-A | 3.3828 eV | 366.51 nm | f=0.0005 |
| 268 ->286          | -0.21263  |           |           |          |
| 269 ->286          | -0.20068  |           |           |          |
| 269 ->288          | 0.16299   |           |           |          |
| 269 ->289          | -0.13831  |           |           |          |

|                    |           |           |           |          |
|--------------------|-----------|-----------|-----------|----------|
| 270 ->288          | 0.21995   |           |           |          |
| 273 ->288          | -0.11182  |           |           |          |
| 275 ->286          | 0.12523   |           |           |          |
| 275 ->287          | -0.14244  |           |           |          |
| 278 ->288          | 0.27469   |           |           |          |
| 279 ->286          | -0.10320  |           |           |          |
| 279 ->287          | 0.18744   |           |           |          |
| 280 ->290          | -0.13213  |           |           |          |
| 280 ->291          | -0.19969  |           |           |          |
| Excited State 108: | Singlet-A | 3.3920 eV | 365.52 nm | f=0.0010 |
| 268 ->289          | -0.11080  |           |           |          |
| 269 ->287          | 0.20292   |           |           |          |
| 269 ->288          | 0.18967   |           |           |          |
| 269 ->289          | 0.37965   |           |           |          |
| 270 ->287          | -0.10073  |           |           |          |
| 270 ->289          | -0.13510  |           |           |          |
| 275 ->287          | 0.14807   |           |           |          |
| 275 ->288          | 0.11446   |           |           |          |
| 275 ->289          | 0.24567   |           |           |          |
| 278 ->289          | -0.17936  |           |           |          |
| 279 ->289          | -0.19657  |           |           |          |
| Excited State 109: | Singlet-A | 3.3947 eV | 365.23 nm | f=0.0013 |
| 272 ->286          | -0.12997  |           |           |          |
| 272 ->288          | 0.10375   |           |           |          |
| 274 ->286          | -0.14164  |           |           |          |
| 274 ->287          | 0.19626   |           |           |          |
| 274 ->288          | 0.13021   |           |           |          |
| 274 ->289          | -0.11700  |           |           |          |
| 276 ->286          | -0.16497  |           |           |          |
| 276 ->287          | 0.10603   |           |           |          |
| 277 ->286          | -0.31913  |           |           |          |
| 277 ->287          | 0.38507   |           |           |          |
| 277 ->288          | 0.12190   |           |           |          |
| 277 ->289          | -0.17623  |           |           |          |
| Excited State 110: | Singlet-A | 3.4025 eV | 364.39 nm | f=0.0000 |
| 282 ->291          | -0.22206  |           |           |          |
| 282 ->292          | 0.64924   |           |           |          |
| Excited State 111: | Singlet-A | 3.4064 eV | 363.98 nm | f=0.0001 |
| 269 ->290          | 0.17259   |           |           |          |
| 269 ->291          | -0.13751  |           |           |          |



|           |          |
|-----------|----------|
| 269 ->292 | -0.11937 |
| 270 ->290 | -0.21992 |
| 270 ->291 | 0.15001  |
| 270 ->292 | 0.10235  |
| 272 ->290 | -0.11151 |
| 275 ->290 | 0.28492  |
| 275 ->291 | -0.23128 |
| 275 ->292 | -0.18967 |
| 277 ->290 | 0.10141  |
| 278 ->290 | 0.14108  |
| 278 ->291 | -0.14344 |

Excited State 112: Singlet-A 3.4101 eV 363.58 nm f=0.0001

|           |          |
|-----------|----------|
| 268 ->288 | -0.13612 |
| 270 ->290 | 0.11919  |
| 272 ->290 | -0.18963 |
| 272 ->291 | 0.13896  |
| 272 ->292 | 0.14171  |
| 274 ->290 | -0.21124 |
| 274 ->291 | 0.16799  |
| 274 ->292 | 0.11473  |
| 275 ->288 | 0.12923  |
| 275 ->290 | -0.13438 |
| 275 ->291 | 0.10223  |
| 276 ->290 | -0.11269 |
| 277 ->290 | 0.21704  |
| 277 ->291 | -0.19725 |
| 277 ->292 | -0.12014 |
| 279 ->288 | -0.12179 |

Excited State 113: Singlet-A 3.4145 eV 363.11 nm f=0.0021

|           |          |
|-----------|----------|
| 268 ->286 | -0.11223 |
| 268 ->288 | 0.23053  |
| 269 ->286 | -0.13509 |
| 269 ->288 | 0.15623  |
| 272 ->290 | -0.13612 |
| 272 ->291 | 0.11212  |
| 274 ->290 | -0.15695 |
| 274 ->291 | 0.11309  |
| 275 ->288 | -0.22510 |
| 277 ->290 | 0.13837  |
| 277 ->291 | -0.11974 |
| 278 ->286 | -0.12954 |
| 278 ->287 | 0.13472  |

|                    |           |           |           |          |
|--------------------|-----------|-----------|-----------|----------|
| 278 ->288          | -0.15269  |           |           |          |
| 279 ->288          | 0.18891   |           |           |          |
| Excited State 114: | Singlet-A | 3.4162 eV | 362.93 nm | f=0.0131 |
| 272 ->286          | 0.14068   |           |           |          |
| 272 ->287          | 0.21383   |           |           |          |
| 272 ->289          | -0.17641  |           |           |          |
| 274 ->286          | -0.25518  |           |           |          |
| 274 ->287          | -0.27821  |           |           |          |
| 274 ->289          | 0.15285   |           |           |          |
| 276 ->286          | 0.20520   |           |           |          |
| 276 ->287          | 0.29122   |           |           |          |
| 276 ->288          | 0.10547   |           |           |          |
| 276 ->289          | -0.10283  |           |           |          |
| Excited State 115: | Singlet-A | 3.4268 eV | 361.81 nm | f=0.0003 |
| 269 ->292          | 0.10135   |           |           |          |
| 270 ->290          | 0.13776   |           |           |          |
| 270 ->291          | -0.20164  |           |           |          |
| 270 ->292          | 0.34519   |           |           |          |
| 273 ->292          | -0.21593  |           |           |          |
| 275 ->291          | -0.13909  |           |           |          |
| 275 ->292          | 0.25009   |           |           |          |
| 278 ->291          | 0.11319   |           |           |          |
| 278 ->292          | -0.24035  |           |           |          |
| 279 ->292          | 0.16814   |           |           |          |
| Excited State 116: | Singlet-A | 3.4349 eV | 360.95 nm | f=0.0490 |
| 266 ->295          | -0.10578  |           |           |          |
| 274 ->295          | 0.15108   |           |           |          |
| 276 ->295          | 0.16631   |           |           |          |
| 277 ->295          | 0.61858   |           |           |          |
| Excited State 117: | Singlet-A | 3.4354 eV | 360.90 nm | f=0.0020 |
| 268 ->294          | 0.10398   |           |           |          |
| 269 ->294          | 0.12678   |           |           |          |
| 273 ->294          | -0.25649  |           |           |          |
| 275 ->294          | -0.19362  |           |           |          |
| 276 ->292          | 0.13389   |           |           |          |
| 278 ->294          | 0.35253   |           |           |          |
| 279 ->294          | 0.30812   |           |           |          |
| 281 ->310          | 0.10730   |           |           |          |
| Excited State 118: | Singlet-A | 3.4462 eV | 359.77 nm | f=0.0000 |

|                    |           |           |           |          |
|--------------------|-----------|-----------|-----------|----------|
| 272 ->290          | -0.11174  |           |           |          |
| 272 ->291          | 0.18600   |           |           |          |
| 272 ->292          | -0.34368  |           |           |          |
| 274 ->292          | 0.20894   |           |           |          |
| 276 ->290          | 0.10474   |           |           |          |
| 276 ->291          | -0.18881  |           |           |          |
| 276 ->292          | 0.37204   |           |           |          |
| 277 ->292          | -0.13858  |           |           |          |
| 278 ->294          | -0.10773  |           |           |          |
| Excited State 119: | Singlet-A | 3.4491 eV | 359.47 nm | f=0.0001 |
| 270 ->290          | 0.15198   |           |           |          |
| 270 ->292          | -0.19776  |           |           |          |
| 273 ->290          | 0.45330   |           |           |          |
| 273 ->291          | -0.24609  |           |           |          |
| 273 ->292          | -0.27619  |           |           |          |
| 278 ->292          | 0.10755   |           |           |          |
| Excited State 120: | Singlet-A | 3.4532 eV | 359.04 nm | f=0.0002 |
| 271 ->290          | 0.44660   |           |           |          |
| 271 ->291          | 0.41160   |           |           |          |
| 271 ->293          | -0.28129  |           |           |          |
| Excited State 121: | Singlet-A | 3.4578 eV | 358.56 nm | f=0.0000 |
| 281 ->291          | 0.11686   |           |           |          |
| 281 ->292          | 0.11037   |           |           |          |
| 281 ->293          | 0.68510   |           |           |          |
| Excited State 122: | Singlet-A | 3.4657 eV | 357.75 nm | f=0.0030 |
| 268 ->289          | -0.16734  |           |           |          |
| 269 ->287          | 0.12200   |           |           |          |
| 269 ->289          | 0.14972   |           |           |          |
| 272 ->287          | -0.13049  |           |           |          |
| 272 ->289          | -0.20460  |           |           |          |
| 275 ->287          | -0.10303  |           |           |          |
| 275 ->289          | -0.19229  |           |           |          |
| 276 ->287          | 0.10865   |           |           |          |
| 276 ->288          | 0.10506   |           |           |          |
| 276 ->289          | 0.29228   |           |           |          |
| 278 ->287          | 0.11980   |           |           |          |
| 278 ->289          | 0.28399   |           |           |          |
| Excited State 123: | Singlet-A | 3.4734 eV | 356.96 nm | f=0.0000 |
| 280 ->291          | 0.12567   |           |           |          |

|                    |           |           |           |          |
|--------------------|-----------|-----------|-----------|----------|
| 280 ->292          | 0.11345   |           |           |          |
| 280 ->293          | 0.68229   |           |           |          |
| Excited State 124: | Singlet-A | 3.4752 eV | 356.77 nm | f=0.0030 |
| 268 ->287          | 0.10867   |           |           |          |
| 268 ->289          | 0.11206   |           |           |          |
| 269 ->287          | -0.16743  |           |           |          |
| 269 ->288          | -0.12625  |           |           |          |
| 269 ->289          | -0.11798  |           |           |          |
| 272 ->287          | -0.13445  |           |           |          |
| 272 ->289          | -0.23435  |           |           |          |
| 276 ->287          | 0.13825   |           |           |          |
| 276 ->288          | 0.13110   |           |           |          |
| 276 ->289          | 0.37284   |           |           |          |
| 278 ->286          | -0.10380  |           |           |          |
| 278 ->289          | -0.21170  |           |           |          |
| Excited State 125: | Singlet-A | 3.4787 eV | 356.40 nm | f=0.0001 |
| 268 ->286          | -0.17303  |           |           |          |
| 268 ->287          | 0.11650   |           |           |          |
| 268 ->289          | -0.11792  |           |           |          |
| 269 ->286          | 0.11790   |           |           |          |
| 269 ->287          | -0.11803  |           |           |          |
| 269 ->289          | 0.12463   |           |           |          |
| 272 ->287          | 0.12837   |           |           |          |
| 272 ->288          | -0.10201  |           |           |          |
| 275 ->289          | -0.11381  |           |           |          |
| 277 ->287          | -0.19826  |           |           |          |
| 277 ->288          | 0.41144   |           |           |          |
| 278 ->288          | 0.16859   |           |           |          |
| Excited State 126: | Singlet-A | 3.4808 eV | 356.20 nm | f=0.0001 |
| 268 ->286          | 0.18959   |           |           |          |
| 268 ->287          | -0.13799  |           |           |          |
| 268 ->289          | 0.12125   |           |           |          |
| 269 ->286          | -0.12904  |           |           |          |
| 269 ->287          | 0.12313   |           |           |          |
| 269 ->289          | -0.13728  |           |           |          |
| 271 ->286          | 0.10478   |           |           |          |
| 271 ->287          | -0.11213  |           |           |          |
| 272 ->288          | -0.15324  |           |           |          |
| 275 ->289          | 0.12590   |           |           |          |
| 277 ->287          | -0.15623  |           |           |          |
| 277 ->288          | 0.39602   |           |           |          |

|                    |           |           |           |          |
|--------------------|-----------|-----------|-----------|----------|
| 278 ->286          | 0.10250   |           |           |          |
| Excited State 127: | Singlet-A | 3.5063 eV | 353.60 nm | f=0.0000 |
| 268 ->287          | -0.12668  |           |           |          |
| 270 ->286          | 0.12228   |           |           |          |
| 270 ->287          | 0.13456   |           |           |          |
| 271 ->287          | -0.10161  |           |           |          |
| 273 ->286          | 0.31399   |           |           |          |
| 273 ->287          | 0.44376   |           |           |          |
| 273 ->288          | 0.18807   |           |           |          |
| 273 ->289          | -0.20939  |           |           |          |
| Excited State 128: | Singlet-A | 3.5147 eV | 352.76 nm | f=0.0003 |
| 268 ->290          | -0.14473  |           |           |          |
| 268 ->291          | -0.25713  |           |           |          |
| 268 ->293          | 0.12321   |           |           |          |
| 270 ->290          | 0.33070   |           |           |          |
| 270 ->291          | 0.32331   |           |           |          |
| 270 ->293          | -0.11596  |           |           |          |
| 273 ->290          | -0.15133  |           |           |          |
| 273 ->291          | -0.16383  |           |           |          |
| 279 ->290          | 0.15806   |           |           |          |
| 279 ->291          | 0.10360   |           |           |          |
| Excited State 129: | Singlet-A | 3.5205 eV | 352.18 nm | f=0.0010 |
| 277 ->297          | 0.34688   |           |           |          |
| 278 ->299          | 0.12554   |           |           |          |
| 279 ->298          | -0.21743  |           |           |          |
| 285 ->298          | 0.23144   |           |           |          |
| 285 ->299          | 0.26432   |           |           |          |
| 285 ->301          | 0.20946   |           |           |          |
| 285 ->304          | 0.12104   |           |           |          |
| Excited State 130: | Singlet-A | 3.5287 eV | 351.36 nm | f=0.0001 |
| 269 ->290          | 0.14415   |           |           |          |
| 269 ->293          | 0.40521   |           |           |          |
| 270 ->293          | -0.15058  |           |           |          |
| 275 ->291          | 0.15163   |           |           |          |
| 275 ->293          | 0.31455   |           |           |          |
| 278 ->292          | -0.12357  |           |           |          |
| 278 ->293          | -0.17611  |           |           |          |
| 279 ->293          | -0.21737  |           |           |          |
| Excited State 131: | Singlet-A | 3.5298 eV | 351.25 nm | f=0.0001 |

|                    |           |           |           |          |
|--------------------|-----------|-----------|-----------|----------|
| 268 ->290          | -0.20380  |           |           |          |
| 269 ->290          | -0.17150  |           |           |          |
| 269 ->291          | 0.16662   |           |           |          |
| 269 ->292          | 0.12573   |           |           |          |
| 270 ->292          | 0.20219   |           |           |          |
| 270 ->293          | -0.10333  |           |           |          |
| 275 ->290          | 0.16495   |           |           |          |
| 275 ->291          | -0.11210  |           |           |          |
| 275 ->292          | 0.20993   |           |           |          |
| 278 ->292          | 0.31028   |           |           |          |
| 279 ->290          | -0.10358  |           |           |          |
| 279 ->291          | 0.14847   |           |           |          |
| 279 ->292          | -0.14248  |           |           |          |
| Excited State 132: | Singlet-A | 3.5316 eV | 351.07 nm | f=0.0082 |
| 277 ->297          | 0.34791   |           |           |          |
| 278 ->299          | -0.14553  |           |           |          |
| 279 ->298          | 0.27625   |           |           |          |
| 284 ->298          | -0.22968  |           |           |          |
| 284 ->299          | 0.23090   |           |           |          |
| 284 ->301          | -0.14494  |           |           |          |
| Excited State 133: | Singlet-A | 3.5347 eV | 350.76 nm | f=0.0002 |
| 268 ->292          | 0.10366   |           |           |          |
| 272 ->290          | 0.12699   |           |           |          |
| 274 ->290          | 0.17233   |           |           |          |
| 274 ->291          | -0.16275  |           |           |          |
| 274 ->292          | -0.11413  |           |           |          |
| 275 ->292          | -0.11969  |           |           |          |
| 276 ->290          | 0.15814   |           |           |          |
| 276 ->291          | -0.11756  |           |           |          |
| 277 ->290          | 0.34403   |           |           |          |
| 277 ->291          | -0.32052  |           |           |          |
| 277 ->292          | -0.14645  |           |           |          |
| 278 ->292          | -0.12610  |           |           |          |
| 279 ->292          | 0.11365   |           |           |          |
| Excited State 134: | Singlet-A | 3.5351 eV | 350.72 nm | f=0.0002 |
| 268 ->290          | 0.18834   |           |           |          |
| 268 ->292          | -0.20819  |           |           |          |
| 269 ->290          | 0.20280   |           |           |          |
| 269 ->291          | -0.12401  |           |           |          |
| 269 ->292          | -0.16275  |           |           |          |
| 270 ->290          | 0.12103   |           |           |          |

|                    |           |           |           |          |
|--------------------|-----------|-----------|-----------|----------|
| 270 ->291          | -0.17496  |           |           |          |
| 275 ->292          | 0.23674   |           |           |          |
| 277 ->290          | 0.13764   |           |           |          |
| 277 ->291          | -0.13045  |           |           |          |
| 278 ->290          | 0.17455   |           |           |          |
| 278 ->291          | -0.18884  |           |           |          |
| 278 ->292          | 0.11476   |           |           |          |
| 279 ->292          | -0.19624  |           |           |          |
| Excited State 135: | Singlet-A | 3.5369 eV | 350.55 nm | f=0.0003 |
| 271 ->286          | 0.27807   |           |           |          |
| 271 ->287          | -0.27435  |           |           |          |
| 271 ->288          | -0.13254  |           |           |          |
| 271 ->289          | 0.13708   |           |           |          |
| 277 ->297          | 0.32069   |           |           |          |
| 278 ->298          | -0.10212  |           |           |          |
| 284 ->298          | 0.10209   |           |           |          |
| 284 ->299          | -0.10983  |           |           |          |
| 285 ->299          | -0.13833  |           |           |          |
| Excited State 136: | Singlet-A | 3.5436 eV | 349.88 nm | f=0.0002 |
| 268 ->288          | -0.15760  |           |           |          |
| 269 ->287          | 0.14966   |           |           |          |
| 270 ->288          | 0.11034   |           |           |          |
| 271 ->286          | -0.21309  |           |           |          |
| 271 ->287          | 0.24169   |           |           |          |
| 275 ->288          | -0.12539  |           |           |          |
| 277 ->297          | 0.19970   |           |           |          |
| 278 ->298          | -0.10177  |           |           |          |
| 279 ->299          | 0.11067   |           |           |          |
| 284 ->298          | 0.12022   |           |           |          |
| 284 ->299          | -0.13784  |           |           |          |
| 284 ->301          | 0.11666   |           |           |          |
| 285 ->298          | -0.11587  |           |           |          |
| 285 ->299          | -0.18423  |           |           |          |
| 285 ->301          | -0.11562  |           |           |          |
| Excited State 137: | Singlet-A | 3.5497 eV | 349.29 nm | f=0.0000 |
| 268 ->287          | -0.17781  |           |           |          |
| 268 ->288          | 0.18045   |           |           |          |
| 269 ->287          | -0.10764  |           |           |          |
| 269 ->288          | 0.24963   |           |           |          |
| 270 ->286          | -0.10269  |           |           |          |
| 270 ->287          | 0.19881   |           |           |          |

|                    |           |           |           |          |
|--------------------|-----------|-----------|-----------|----------|
| 270 ->288          | -0.23878  |           |           |          |
| 271 ->286          | -0.14409  |           |           |          |
| 271 ->287          | 0.12150   |           |           |          |
| 271 ->288          | 0.16912   |           |           |          |
| 275 ->287          | -0.15271  |           |           |          |
| 275 ->288          | 0.29136   |           |           |          |
| Excited State 138: | Singlet-A | 3.5523 eV | 349.03 nm | f=0.0005 |
| 272 ->287          | -0.19232  |           |           |          |
| 272 ->288          | 0.34592   |           |           |          |
| 274 ->287          | -0.21671  |           |           |          |
| 274 ->288          | 0.37898   |           |           |          |
| 276 ->287          | -0.10640  |           |           |          |
| 276 ->288          | 0.20044   |           |           |          |
| 277 ->288          | 0.19086   |           |           |          |
| Excited State 139: | Singlet-A | 3.5530 eV | 348.95 nm | f=0.0013 |
| 268 ->296          | 0.11524   |           |           |          |
| 269 ->296          | 0.13179   |           |           |          |
| 273 ->296          | -0.31049  |           |           |          |
| 275 ->296          | -0.20614  |           |           |          |
| 278 ->296          | 0.35869   |           |           |          |
| 279 ->296          | 0.29214   |           |           |          |
| 284 ->296          | -0.25124  |           |           |          |
| Excited State 140: | Singlet-A | 3.5574 eV | 348.52 nm | f=0.0001 |
| 272 ->290          | -0.18253  |           |           |          |
| 272 ->291          | -0.22380  |           |           |          |
| 272 ->293          | 0.12003   |           |           |          |
| 274 ->290          | 0.27893   |           |           |          |
| 274 ->291          | 0.33315   |           |           |          |
| 274 ->293          | -0.12294  |           |           |          |
| 276 ->290          | -0.24103  |           |           |          |
| 276 ->291          | -0.30193  |           |           |          |
| Excited State 141: | Singlet-A | 3.5812 eV | 346.21 nm | f=0.0000 |
| 279 ->298          | 0.17999   |           |           |          |
| 284 ->299          | -0.10349  |           |           |          |
| 285 ->294          | 0.59383   |           |           |          |
| Excited State 142: | Singlet-A | 3.5835 eV | 345.99 nm | f=0.0000 |
| 269 ->298          | 0.10826   |           |           |          |
| 278 ->295          | 0.14065   |           |           |          |
| 279 ->295          | -0.17127  |           |           |          |



|                    |           |           |           |          |
|--------------------|-----------|-----------|-----------|----------|
| 279 ->298          | -0.30160  |           |           |          |
| 279 ->301          | 0.13721   |           |           |          |
| 284 ->299          | 0.13561   |           |           |          |
| 284 ->301          | -0.13302  |           |           |          |
| 285 ->294          | 0.36601   |           |           |          |
| 285 ->301          | -0.14570  |           |           |          |
| Excited State 143: | Singlet-A | 3.5925 eV | 345.12 nm | f=0.0001 |
| 268 ->293          | -0.17673  |           |           |          |
| 269 ->293          | 0.21005   |           |           |          |
| 272 ->293          | -0.25149  |           |           |          |
| 275 ->293          | -0.19472  |           |           |          |
| 276 ->293          | 0.34897   |           |           |          |
| 278 ->293          | 0.30891   |           |           |          |
| Excited State 144: | Singlet-A | 3.5958 eV | 344.81 nm | f=0.0008 |
| 272 ->287          | -0.14796  |           |           |          |
| 272 ->288          | -0.13784  |           |           |          |
| 272 ->289          | -0.37545  |           |           |          |
| 274 ->287          | 0.15739   |           |           |          |
| 274 ->288          | 0.14747   |           |           |          |
| 274 ->289          | 0.41404   |           |           |          |
| 276 ->289          | -0.24836  |           |           |          |
| Excited State 145: | Singlet-A | 3.6005 eV | 344.35 nm | f=0.0000 |
| 272 ->292          | -0.17334  |           |           |          |
| 277 ->291          | -0.23209  |           |           |          |
| 277 ->292          | 0.60087   |           |           |          |
| Excited State 146: | Singlet-A | 3.6033 eV | 344.09 nm | f=0.0001 |
| 268 ->293          | 0.17451   |           |           |          |
| 269 ->293          | -0.23761  |           |           |          |
| 270 ->293          | 0.11421   |           |           |          |
| 272 ->293          | -0.24295  |           |           |          |
| 275 ->293          | 0.13508   |           |           |          |
| 276 ->291          | 0.10014   |           |           |          |
| 276 ->293          | 0.40937   |           |           |          |
| 278 ->293          | -0.26745  |           |           |          |
| Excited State 147: | Singlet-A | 3.6049 eV | 343.93 nm | f=0.0001 |
| 268 ->286          | -0.14293  |           |           |          |
| 268 ->287          | -0.24750  |           |           |          |
| 268 ->289          | 0.14134   |           |           |          |
| 269 ->286          | -0.14223  |           |           |          |

|                    |           |           |           |          |
|--------------------|-----------|-----------|-----------|----------|
| 269 ->287          | -0.16253  |           |           |          |
| 269 ->289          | 0.10774   |           |           |          |
| 270 ->286          | -0.13144  |           |           |          |
| 270 ->287          | -0.18398  |           |           |          |
| 275 ->295          | -0.12734  |           |           |          |
| 278 ->295          | -0.25913  |           |           |          |
| 279 ->295          | 0.30195   |           |           |          |
| Excited State 148: | Singlet-A | 3.6105 eV | 343.40 nm | f=0.0000 |
| 268 ->286          | 0.13936   |           |           |          |
| 268 ->287          | 0.20382   |           |           |          |
| 268 ->289          | -0.13550  |           |           |          |
| 269 ->286          | 0.10819   |           |           |          |
| 269 ->287          | 0.14373   |           |           |          |
| 270 ->286          | 0.10512   |           |           |          |
| 270 ->287          | 0.15621   |           |           |          |
| 275 ->295          | -0.12206  |           |           |          |
| 278 ->295          | -0.24410  |           |           |          |
| 279 ->295          | 0.28836   |           |           |          |
| 279 ->298          | -0.18613  |           |           |          |
| 285 ->301          | -0.11316  |           |           |          |
| Excited State 149: | Singlet-A | 3.6213 eV | 342.37 nm | f=0.0001 |
| 268 ->290          | 0.28538   |           |           |          |
| 268 ->291          | -0.21396  |           |           |          |
| 268 ->292          | -0.14523  |           |           |          |
| 269 ->290          | -0.25888  |           |           |          |
| 269 ->291          | 0.22487   |           |           |          |
| 269 ->292          | 0.16247   |           |           |          |
| 270 ->290          | 0.11667   |           |           |          |
| 271 ->290          | 0.15267   |           |           |          |
| 271 ->291          | -0.13338  |           |           |          |
| 278 ->290          | 0.17519   |           |           |          |
| 278 ->291          | -0.12383  |           |           |          |
| 278 ->292          | -0.12867  |           |           |          |
| Excited State 150: | Singlet-A | 3.6226 eV | 342.25 nm | f=0.0000 |
| 270 ->289          | -0.23679  |           |           |          |
| 273 ->287          | 0.17038   |           |           |          |
| 273 ->288          | 0.18110   |           |           |          |
| 273 ->289          | 0.54253   |           |           |          |
| Excited State 151: | Singlet-A | 3.6326 eV | 341.31 nm | f=0.0001 |
| 270 ->294          | 0.14632   |           |           |          |

|                    |           |           |           |          |
|--------------------|-----------|-----------|-----------|----------|
| 273 ->294          | 0.52553   |           |           |          |
| 278 ->294          | 0.12649   |           |           |          |
| 279 ->294          | 0.31544   |           |           |          |
| 283 ->294          | -0.12040  |           |           |          |
| Excited State 152: | Singlet-A | 3.6352 eV | 341.07 nm | f=0.0000 |
| 283 ->294          | 0.69639   |           |           |          |
| Excited State 153: | Singlet-A | 3.6450 eV | 340.15 nm | f=0.0000 |
| 268 ->291          | -0.11011  |           |           |          |
| 270 ->290          | 0.12770   |           |           |          |
| 270 ->291          | 0.14267   |           |           |          |
| 273 ->290          | 0.36667   |           |           |          |
| 273 ->291          | 0.47391   |           |           |          |
| 273 ->292          | 0.12234   |           |           |          |
| 273 ->293          | -0.14974  |           |           |          |
| Excited State 154: | Singlet-A | 3.6554 eV | 339.18 nm | f=0.0000 |
| 268 ->298          | 0.17854   |           |           |          |
| 278 ->298          | -0.23094  |           |           |          |
| 279 ->299          | 0.27511   |           |           |          |
| 279 ->304          | -0.20323  |           |           |          |
| 284 ->295          | 0.33184   |           |           |          |
| 284 ->301          | -0.14065  |           |           |          |
| 284 ->304          | 0.11234   |           |           |          |
| 285 ->301          | 0.10880   |           |           |          |
| 285 ->304          | 0.13925   |           |           |          |
| Excited State 155: | Singlet-A | 3.6597 eV | 338.78 nm | f=0.0001 |
| 278 ->295          | -0.10808  |           |           |          |
| 278 ->298          | 0.11693   |           |           |          |
| 279 ->299          | -0.14131  |           |           |          |
| 279 ->304          | 0.10115   |           |           |          |
| 284 ->295          | 0.60220   |           |           |          |
| Excited State 156: | Singlet-A | 3.6616 eV | 338.61 nm | f=0.0028 |
| 272 ->294          | 0.18534   |           |           |          |
| 274 ->294          | -0.36708  |           |           |          |
| 276 ->294          | 0.42540   |           |           |          |
| 284 ->300          | -0.11942  |           |           |          |
| 284 ->302          | -0.14305  |           |           |          |
| 284 ->303          | -0.11082  |           |           |          |
| Excited State 157: | Singlet-A | 3.6636 eV | 338.42 nm | f=0.0000 |

|                    |           |           |           |          |
|--------------------|-----------|-----------|-----------|----------|
| 269 ->287          | 0.12539   |           |           |          |
| 269 ->288          | -0.19001  |           |           |          |
| 270 ->288          | 0.13803   |           |           |          |
| 271 ->287          | -0.25131  |           |           |          |
| 271 ->288          | 0.53122   |           |           |          |
| Excited State 158: | Singlet-A | 3.6752 eV | 337.36 nm | f=0.0000 |
| 268 ->287          | -0.11386  |           |           |          |
| 268 ->289          | -0.21438  |           |           |          |
| 270 ->287          | 0.17192   |           |           |          |
| 270 ->288          | 0.16437   |           |           |          |
| 270 ->289          | 0.44600   |           |           |          |
| 273 ->289          | 0.28748   |           |           |          |
| 275 ->289          | 0.11923   |           |           |          |
| Excited State 159: | Singlet-A | 3.6764 eV | 337.24 nm | f=0.0000 |
| 272 ->291          | -0.18124  |           |           |          |
| 272 ->292          | 0.37548   |           |           |          |
| 274 ->291          | -0.18982  |           |           |          |
| 274 ->292          | 0.41208   |           |           |          |
| 276 ->292          | 0.20542   |           |           |          |
| 277 ->292          | 0.16816   |           |           |          |
| Excited State 160: | Singlet-A | 3.6790 eV | 337.00 nm | f=0.0002 |
| 268 ->292          | -0.25883  |           |           |          |
| 269 ->290          | -0.10951  |           |           |          |
| 269 ->291          | 0.15703   |           |           |          |
| 269 ->292          | -0.18876  |           |           |          |
| 270 ->291          | -0.11405  |           |           |          |
| 270 ->292          | 0.28263   |           |           |          |
| 271 ->290          | -0.25611  |           |           |          |
| 271 ->291          | 0.24500   |           |           |          |
| 275 ->291          | 0.15536   |           |           |          |
| 275 ->292          | -0.27147  |           |           |          |
| Excited State 161: | Singlet-A | 3.6830 eV | 336.64 nm | f=0.0000 |
| 268 ->290          | -0.15892  |           |           |          |
| 268 ->291          | 0.16527   |           |           |          |
| 269 ->292          | -0.19683  |           |           |          |
| 270 ->291          | -0.12667  |           |           |          |
| 270 ->292          | 0.16628   |           |           |          |
| 271 ->290          | 0.35824   |           |           |          |
| 271 ->291          | -0.29687  |           |           |          |
| 271 ->292          | -0.24558  |           |           |          |

|                    |           |           |           |          |  |
|--------------------|-----------|-----------|-----------|----------|--|
| 275 ->292          |           | -0.19532  |           |          |  |
| Excited State 162: | Singlet-A | 3.6937 eV | 335.66 nm | f=0.0047 |  |
| 277 ->298          |           | 0.18538   |           |          |  |
| 277 ->299          |           | 0.21855   |           |          |  |
| 277 ->301          |           | 0.15935   |           |          |  |
| 278 ->302          |           | 0.12012   |           |          |  |
| 279 ->300          |           | 0.17526   |           |          |  |
| 285 ->300          |           | -0.23310  |           |          |  |
| 285 ->302          |           | 0.28687   |           |          |  |
| 285 ->303          |           | -0.23409  |           |          |  |
| 285 ->305          |           | 0.14376   |           |          |  |
| Excited State 163: | Singlet-A | 3.6953 eV | 335.51 nm | f=0.0000 |  |
| 282 ->294          |           | 0.70356   |           |          |  |
| Excited State 164: | Singlet-A | 3.7039 eV | 334.74 nm | f=0.0000 |  |
| 268 ->286          |           | 0.10260   |           |          |  |
| 268 ->287          |           | -0.22267  |           |          |  |
| 268 ->288          |           | 0.37517   |           |          |  |
| 269 ->287          |           | 0.21074   |           |          |  |
| 269 ->288          |           | -0.34776  |           |          |  |
| 271 ->287          |           | 0.12107   |           |          |  |
| 271 ->288          |           | -0.24517  |           |          |  |
| Excited State 165: | Singlet-A | 3.7114 eV | 334.06 nm | f=0.0061 |  |
| 274 ->294          |           | -0.18672  |           |          |  |
| 276 ->294          |           | 0.21551   |           |          |  |
| 276 ->298          |           | 0.16732   |           |          |  |
| 278 ->300          |           | -0.10247  |           |          |  |
| 279 ->297          |           | 0.12242   |           |          |  |
| 279 ->300          |           | -0.17300  |           |          |  |
| 280 ->299          |           | 0.10886   |           |          |  |
| 284 ->300          |           | 0.22518   |           |          |  |
| 284 ->302          |           | 0.23750   |           |          |  |
| 284 ->303          |           | 0.16919   |           |          |  |
| Excited State 166: | Singlet-A | 3.7131 eV | 333.91 nm | f=0.0003 |  |
| 269 ->297          |           | 0.10780   |           |          |  |
| 275 ->297          |           | -0.17972  |           |          |  |
| 278 ->297          |           | -0.37338  |           |          |  |
| 279 ->297          |           | 0.46238   |           |          |  |
| 284 ->297          |           | -0.16212  |           |          |  |
| 285 ->297          |           | -0.14971  |           |          |  |

|                    |           |           |           |          |
|--------------------|-----------|-----------|-----------|----------|
| Excited State 167: | Singlet-A | 3.7166 eV | 333.60 nm | f=0.0000 |
| 272 ->291          | -0.11135  |           |           |          |
| 272 ->293          | -0.41818  |           |           |          |
| 274 ->291          | 0.11365   |           |           |          |
| 274 ->293          | 0.44873   |           |           |          |
| 276 ->293          | -0.24654  |           |           |          |
| Excited State 168: | Singlet-A | 3.7179 eV | 333.47 nm | f=0.0000 |
| 285 ->296          | 0.69670   |           |           |          |
| Excited State 169: | Singlet-A | 3.7188 eV | 333.40 nm | f=0.0001 |
| 278 ->299          | -0.13492  |           |           |          |
| 278 ->301          | 0.12774   |           |           |          |
| 279 ->301          | 0.13769   |           |           |          |
| 279 ->304          | -0.12938  |           |           |          |
| 284 ->304          | -0.13629  |           |           |          |
| 284 ->306          | -0.29755  |           |           |          |
| 284 ->307          | 0.12048   |           |           |          |
| 284 ->310          | 0.39680   |           |           |          |
| Excited State 170: | Singlet-A | 3.7398 eV | 331.53 nm | f=0.0036 |
| 268 ->290          | 0.15985   |           |           |          |
| 268 ->291          | 0.21214   |           |           |          |
| 269 ->290          | 0.15159   |           |           |          |
| 269 ->291          | 0.17700   |           |           |          |
| 269 ->294          | -0.10691  |           |           |          |
| 270 ->290          | 0.12819   |           |           |          |
| 270 ->291          | 0.16124   |           |           |          |
| 274 ->298          | 0.10492   |           |           |          |
| 275 ->294          | 0.11536   |           |           |          |
| 276 ->298          | 0.11135   |           |           |          |
| 278 ->294          | -0.12845  |           |           |          |
| 279 ->294          | 0.26357   |           |           |          |
| 279 ->300          | -0.15210  |           |           |          |
| Excited State 171: | Singlet-A | 3.7400 eV | 331.50 nm | f=0.0010 |
| 268 ->290          | -0.11410  |           |           |          |
| 268 ->291          | -0.14781  |           |           |          |
| 268 ->294          | -0.10674  |           |           |          |
| 269 ->290          | -0.10343  |           |           |          |
| 269 ->291          | -0.12466  |           |           |          |
| 269 ->294          | -0.16336  |           |           |          |
| 270 ->291          | -0.11365  |           |           |          |

|                    |           |           |           |          |
|--------------------|-----------|-----------|-----------|----------|
| 270 ->294          | -0.11726  |           |           |          |
| 273 ->294          | -0.13468  |           |           |          |
| 275 ->294          | 0.17579   |           |           |          |
| 278 ->294          | -0.19760  |           |           |          |
| 279 ->294          | 0.40538   |           |           |          |
| Excited State 172: | Singlet-A | 3.7421 eV | 331.32 nm | f=0.0006 |
| 268 ->293          | 0.12218   |           |           |          |
| 269 ->291          | -0.10358  |           |           |          |
| 270 ->290          | -0.10208  |           |           |          |
| 270 ->291          | -0.15820  |           |           |          |
| 270 ->293          | -0.13677  |           |           |          |
| 273 ->293          | 0.42849   |           |           |          |
| 274 ->298          | 0.10784   |           |           |          |
| 276 ->298          | 0.12900   |           |           |          |
| 279 ->300          | -0.20197  |           |           |          |
| Excited State 173: | Singlet-A | 3.7436 eV | 331.19 nm | f=0.0008 |
| 268 ->290          | 0.12793   |           |           |          |
| 268 ->291          | 0.16865   |           |           |          |
| 269 ->291          | 0.12375   |           |           |          |
| 270 ->293          | -0.19775  |           |           |          |
| 273 ->291          | 0.11085   |           |           |          |
| 273 ->293          | 0.43411   |           |           |          |
| 276 ->298          | -0.12005  |           |           |          |
| 279 ->300          | 0.18596   |           |           |          |
| Excited State 174: | Singlet-A | 3.7501 eV | 330.62 nm | f=0.0009 |
| 271 ->295          | 0.42444   |           |           |          |
| 275 ->295          | 0.16147   |           |           |          |
| 277 ->300          | 0.16607   |           |           |          |
| 277 ->302          | -0.24466  |           |           |          |
| 277 ->303          | 0.22711   |           |           |          |
| 277 ->305          | -0.15008  |           |           |          |
| 279 ->295          | 0.10874   |           |           |          |
| Excited State 175: | Singlet-A | 3.7540 eV | 330.27 nm | f=0.0000 |
| 278 ->297          | -0.13757  |           |           |          |
| 284 ->297          | 0.68128   |           |           |          |
| Excited State 176: | Singlet-A | 3.7567 eV | 330.04 nm | f=0.0000 |
| 271 ->295          | 0.26186   |           |           |          |
| 275 ->295          | 0.11291   |           |           |          |
| 277 ->300          | -0.17903  |           |           |          |

|                    |           |           |           |          |
|--------------------|-----------|-----------|-----------|----------|
| 277 ->302          | 0.25722   |           |           |          |
| 277 ->303          | -0.23395  |           |           |          |
| 277 ->305          | 0.15333   |           |           |          |
| 282 ->298          | -0.11985  |           |           |          |
| 282 ->299          | -0.18146  |           |           |          |
| 282 ->301          | -0.17560  |           |           |          |
| 282 ->304          | -0.12869  |           |           |          |
| 282 ->312          | 0.16377   |           |           |          |
| Excited State 177: | Singlet-A | 3.7595 eV | 329.79 nm | f=0.0005 |
| 267 ->295          | 0.12001   |           |           |          |
| 271 ->295          | 0.30188   |           |           |          |
| 275 ->295          | 0.12084   |           |           |          |
| 277 ->302          | 0.11806   |           |           |          |
| 277 ->303          | -0.10186  |           |           |          |
| 282 ->298          | 0.15069   |           |           |          |
| 282 ->299          | 0.23273   |           |           |          |
| 282 ->301          | 0.23168   |           |           |          |
| 282 ->304          | 0.17302   |           |           |          |
| 282 ->312          | -0.23543  |           |           |          |
| 282 ->315          | 0.10829   |           |           |          |
| 283 ->313          | -0.15726  |           |           |          |
| Excited State 178: | Singlet-A | 3.7708 eV | 328.80 nm | f=0.0000 |
| 283 ->296          | 0.70668   |           |           |          |
| Excited State 179: | Singlet-A | 3.7721 eV | 328.69 nm | f=0.0000 |
| 268 ->287          | 0.16787   |           |           |          |
| 268 ->288          | 0.16192   |           |           |          |
| 268 ->289          | 0.44841   |           |           |          |
| 269 ->287          | 0.11180   |           |           |          |
| 269 ->288          | 0.10766   |           |           |          |
| 269 ->289          | 0.31688   |           |           |          |
| 270 ->289          | 0.22745   |           |           |          |
| 275 ->289          | -0.12392  |           |           |          |
| Excited State 180: | Singlet-A | 3.7784 eV | 328.14 nm | f=0.0036 |
| 272 ->298          | 0.15021   |           |           |          |
| 278 ->300          | 0.11223   |           |           |          |
| 279 ->302          | 0.13060   |           |           |          |
| 279 ->305          | -0.11986  |           |           |          |
| 282 ->313          | -0.14497  |           |           |          |
| 283 ->298          | 0.22732   |           |           |          |
| 283 ->299          | 0.30543   |           |           |          |



|                    |           |           |           |          |
|--------------------|-----------|-----------|-----------|----------|
| 283 ->301          | 0.26028   |           |           |          |
| 283 ->304          | 0.16714   |           |           |          |
| 283 ->312          | -0.18021  |           |           |          |
| Excited State 181: | Singlet-A | 3.7828 eV | 327.76 nm | f=0.0031 |
| 272 ->303          | 0.11754   |           |           |          |
| 272 ->305          | 0.10346   |           |           |          |
| 274 ->302          | -0.17821  |           |           |          |
| 274 ->303          | -0.14593  |           |           |          |
| 276 ->300          | 0.26490   |           |           |          |
| 276 ->302          | 0.18656   |           |           |          |
| 280 ->298          | 0.17253   |           |           |          |
| 280 ->299          | -0.22481  |           |           |          |
| 280 ->300          | -0.14514  |           |           |          |
| 280 ->301          | 0.20149   |           |           |          |
| 280 ->302          | -0.16959  |           |           |          |
| 280 ->303          | -0.15055  |           |           |          |
| 280 ->304          | -0.10034  |           |           |          |
| Excited State 182: | Singlet-A | 3.7843 eV | 327.63 nm | f=0.0003 |
| 281 ->295          | 0.68998   |           |           |          |
| Excited State 183: | Singlet-A | 3.7851 eV | 327.56 nm | f=0.0078 |
| 271 ->292          | 0.23457   |           |           |          |
| 274 ->302          | 0.10203   |           |           |          |
| 276 ->300          | -0.16920  |           |           |          |
| 276 ->302          | -0.10491  |           |           |          |
| 280 ->298          | 0.18898   |           |           |          |
| 280 ->299          | -0.24436  |           |           |          |
| 280 ->301          | 0.19238   |           |           |          |
| 280 ->302          | 0.11050   |           |           |          |
| 280 ->304          | -0.11444  |           |           |          |
| 281 ->295          | 0.13817   |           |           |          |
| Excited State 184: | Singlet-A | 3.7854 eV | 327.53 nm | f=0.0016 |
| 269 ->292          | -0.17384  |           |           |          |
| 270 ->292          | 0.14845   |           |           |          |
| 271 ->291          | -0.21294  |           |           |          |
| 271 ->292          | 0.51517   |           |           |          |
| 280 ->299          | 0.10666   |           |           |          |
| Excited State 185: | Singlet-A | 3.7889 eV | 327.23 nm | f=0.0018 |
| 272 ->298          | 0.17655   |           |           |          |
| 273 ->296          | 0.20074   |           |           |          |

|                    |           |           |           |          |
|--------------------|-----------|-----------|-----------|----------|
| 274 ->298          | 0.10518   |           |           |          |
| 278 ->300          | 0.11184   |           |           |          |
| 279 ->296          | 0.14484   |           |           |          |
| 279 ->302          | 0.14580   |           |           |          |
| 279 ->305          | -0.16490  |           |           |          |
| 283 ->298          | -0.10157  |           |           |          |
| 283 ->299          | -0.12868  |           |           |          |
| 283 ->301          | -0.10394  |           |           |          |
| 284 ->303          | 0.10784   |           |           |          |
| 285 ->305          | 0.10460   |           |           |          |
| Excited State 186: | Singlet-A | 3.7907 eV | 327.07 nm | f=0.0004 |
| 270 ->296          | 0.12043   |           |           |          |
| 273 ->296          | 0.47199   |           |           |          |
| 278 ->296          | 0.11350   |           |           |          |
| 279 ->296          | 0.34743   |           |           |          |
| Excited State 187: | Singlet-A | 3.7936 eV | 326.82 nm | f=0.0012 |
| 271 ->298          | -0.11117  |           |           |          |
| 271 ->299          | -0.10349  |           |           |          |
| 275 ->301          | -0.11737  |           |           |          |
| 278 ->299          | -0.15174  |           |           |          |
| 278 ->301          | -0.19131  |           |           |          |
| 278 ->304          | -0.12294  |           |           |          |
| 279 ->299          | 0.14858   |           |           |          |
| 279 ->301          | 0.14262   |           |           |          |
| 279 ->302          | 0.10043   |           |           |          |
| 285 ->298          | 0.21629   |           |           |          |
| 285 ->299          | 0.10549   |           |           |          |
| 285 ->304          | -0.11815  |           |           |          |
| 285 ->309          | 0.15990   |           |           |          |
| Excited State 188: | Singlet-A | 3.7967 eV | 326.56 nm | f=0.0013 |
| 268 ->293          | -0.23856  |           |           |          |
| 270 ->291          | 0.12970   |           |           |          |
| 270 ->293          | 0.50887   |           |           |          |
| 271 ->293          | -0.11572  |           |           |          |
| 273 ->293          | 0.26671   |           |           |          |
| 275 ->293          | 0.13704   |           |           |          |
| Excited State 189: | Singlet-A | 3.8005 eV | 326.23 nm | f=0.0002 |
| 272 ->302          | -0.20678  |           |           |          |
| 272 ->305          | 0.14394   |           |           |          |
| 274 ->300          | 0.32222   |           |           |          |

|                    |           |           |           |          |
|--------------------|-----------|-----------|-----------|----------|
| 274 ->305          | 0.17160   |           |           |          |
| 276 ->300          | 0.27140   |           |           |          |
| 276 ->302          | -0.11094  |           |           |          |
| 276 ->303          | -0.18860  |           |           |          |
| 277 ->300          | -0.15664  |           |           |          |
| 277 ->303          | 0.11275   |           |           |          |
| 277 ->305          | -0.10328  |           |           |          |
| 280 ->302          | 0.10783   |           |           |          |
| 280 ->303          | 0.10245   |           |           |          |
| Excited State 190: | Singlet-A | 3.8026 eV | 326.05 nm | f=0.0000 |
| 280 ->295          | 0.70441   |           |           |          |
| Excited State 191: | Singlet-A | 3.8059 eV | 325.76 nm | f=0.0011 |
| 270 ->298          | 0.20637   |           |           |          |
| 270 ->299          | -0.11997  |           |           |          |
| 273 ->299          | -0.13524  |           |           |          |
| 273 ->301          | 0.12952   |           |           |          |
| 278 ->299          | -0.12482  |           |           |          |
| 278 ->301          | 0.14411   |           |           |          |
| 278 ->304          | -0.11030  |           |           |          |
| 279 ->299          | -0.18059  |           |           |          |
| 279 ->301          | 0.15900   |           |           |          |
| 279 ->307          | 0.12442   |           |           |          |
| 281 ->299          | 0.10571   |           |           |          |
| 284 ->298          | 0.19670   |           |           |          |
| 284 ->307          | -0.12159  |           |           |          |
| Excited State 192: | Singlet-A | 3.8128 eV | 325.18 nm | f=0.0008 |
| 267 ->295          | -0.12744  |           |           |          |
| 269 ->298          | -0.12597  |           |           |          |
| 271 ->295          | -0.12036  |           |           |          |
| 275 ->295          | 0.13202   |           |           |          |
| 275 ->298          | -0.25302  |           |           |          |
| 275 ->299          | -0.14234  |           |           |          |
| 278 ->295          | 0.19316   |           |           |          |
| 279 ->295          | 0.26729   |           |           |          |
| 279 ->304          | 0.10575   |           |           |          |
| 279 ->308          | -0.12387  |           |           |          |
| 285 ->312          | -0.12772  |           |           |          |
| Excited State 193: | Singlet-A | 3.8140 eV | 325.07 nm | f=0.0003 |
| 272 ->300          | 0.12429   |           |           |          |
| 275 ->299          | -0.11961  |           |           |          |

|                    |           |           |           |          |
|--------------------|-----------|-----------|-----------|----------|
| 276 ->305          | 0.10415   |           |           |          |
| 277 ->302          | 0.10031   |           |           |          |
| 278 ->298          | -0.10799  |           |           |          |
| 283 ->302          | -0.11674  |           |           |          |
| 283 ->303          | 0.12655   |           |           |          |
| 283 ->313          | 0.45003   |           |           |          |
| 285 ->312          | -0.10033  |           |           |          |
| Excited State 194: | Singlet-A | 3.8152 eV | 324.97 nm | f=0.0012 |
| 270 ->298          | -0.10933  |           |           |          |
| 272 ->300          | -0.13927  |           |           |          |
| 273 ->298          | 0.12944   |           |           |          |
| 274 ->302          | 0.10129   |           |           |          |
| 275 ->298          | -0.24614  |           |           |          |
| 279 ->295          | -0.10330  |           |           |          |
| 281 ->298          | -0.10284  |           |           |          |
| 281 ->299          | 0.13457   |           |           |          |
| 281 ->301          | -0.11605  |           |           |          |
| 283 ->313          | 0.25949   |           |           |          |
| Excited State 195: | Singlet-A | 3.8176 eV | 324.77 nm | f=0.0009 |
| 272 ->300          | 0.13571   |           |           |          |
| 274 ->296          | -0.17967  |           |           |          |
| 275 ->295          | 0.10449   |           |           |          |
| 276 ->296          | 0.20819   |           |           |          |
| 278 ->295          | 0.13808   |           |           |          |
| 279 ->295          | 0.20005   |           |           |          |
| 281 ->298          | -0.13041  |           |           |          |
| 281 ->299          | 0.17814   |           |           |          |
| 281 ->301          | -0.16365  |           |           |          |
| 281 ->304          | 0.11315   |           |           |          |
| 281 ->310          | -0.15758  |           |           |          |
| 284 ->306          | -0.10238  |           |           |          |
| Excited State 196: | Singlet-A | 3.8223 eV | 324.37 nm | f=0.0001 |
| 269 ->298          | 0.14113   |           |           |          |
| 270 ->298          | -0.10849  |           |           |          |
| 273 ->298          | 0.11054   |           |           |          |
| 273 ->299          | -0.10614  |           |           |          |
| 275 ->295          | 0.12029   |           |           |          |
| 275 ->299          | 0.17833   |           |           |          |
| 278 ->295          | 0.17961   |           |           |          |
| 278 ->298          | 0.16997   |           |           |          |
| 279 ->295          | 0.25063   |           |           |          |

|                    |           |           |           |          |
|--------------------|-----------|-----------|-----------|----------|
| 283 ->313          | 0.11771   |           |           |          |
| 284 ->306          | 0.10472   |           |           |          |
| Excited State 197: | Singlet-A | 3.8288 eV | 323.82 nm | f=0.0021 |
| 272 ->296          | 0.15362   |           |           |          |
| 274 ->296          | -0.30759  |           |           |          |
| 275 ->298          | -0.10634  |           |           |          |
| 276 ->296          | 0.36236   |           |           |          |
| 276 ->302          | -0.10188  |           |           |          |
| 281 ->298          | 0.11893   |           |           |          |
| 281 ->299          | -0.15643  |           |           |          |
| 281 ->301          | 0.13833   |           |           |          |
| 281 ->310          | 0.11317   |           |           |          |
| 284 ->314          | 0.10262   |           |           |          |
| Excited State 198: | Singlet-A | 3.8311 eV | 323.62 nm | f=0.0011 |
| 268 ->291          | -0.16389  |           |           |          |
| 268 ->292          | 0.35566   |           |           |          |
| 269 ->291          | 0.15273   |           |           |          |
| 269 ->292          | -0.32581  |           |           |          |
| 271 ->292          | -0.18477  |           |           |          |
| 282 ->296          | 0.26350   |           |           |          |
| Excited State 199: | Singlet-A | 3.8313 eV | 323.61 nm | f=0.0000 |
| 272 ->300          | 0.13014   |           |           |          |
| 276 ->296          | -0.10096  |           |           |          |
| 282 ->296          | 0.60141   |           |           |          |
| Excited State 200: | Singlet-A | 3.8315 eV | 323.59 nm | f=0.0012 |
| 268 ->291          | 0.10166   |           |           |          |
| 268 ->292          | -0.21369  |           |           |          |
| 269 ->292          | 0.19651   |           |           |          |
| 271 ->292          | 0.11305   |           |           |          |
| 272 ->300          | -0.20366  |           |           |          |
| 274 ->296          | -0.11786  |           |           |          |
| 274 ->302          | 0.12751   |           |           |          |
| 275 ->298          | 0.12833   |           |           |          |
| 276 ->296          | 0.14290   |           |           |          |
| 276 ->303          | -0.10415  |           |           |          |
| 276 ->305          | -0.14412  |           |           |          |
| 282 ->296          | 0.25443   |           |           |          |
| Excited State 201: | Singlet-A | 3.8374 eV | 323.10 nm | f=0.0309 |
| 277 ->298          | 0.23487   |           |           |          |

|           |          |
|-----------|----------|
| 277 ->299 | 0.24313  |
| 277 ->301 | 0.12757  |
| 277 ->309 | 0.10284  |
| 283 ->312 | 0.12379  |
| 285 ->300 | 0.11157  |
| 285 ->302 | -0.12935 |
| 285 ->312 | 0.11644  |

Excited State 202: Singlet-A 3.8383 eV 323.02 nm f=0.0127

|           |          |
|-----------|----------|
| 271 ->295 | -0.10670 |
| 277 ->298 | -0.11050 |
| 277 ->299 | -0.13839 |
| 278 ->295 | 0.11979  |
| 279 ->295 | 0.11797  |
| 282 ->299 | 0.12147  |
| 285 ->301 | -0.10578 |
| 285 ->304 | -0.14804 |
| 285 ->309 | 0.19571  |
| 285 ->312 | 0.25988  |

Excited State 203: Singlet-A 3.8505 eV 322.00 nm f=0.0992

|           |          |
|-----------|----------|
| 262 ->286 | -0.11904 |
| 270 ->300 | -0.14166 |
| 272 ->298 | 0.10625  |
| 274 ->299 | 0.18898  |
| 274 ->301 | -0.12013 |
| 276 ->298 | 0.25400  |
| 276 ->299 | -0.16874 |
| 279 ->300 | 0.11366  |
| 279 ->303 | -0.10795 |
| 280 ->310 | 0.10500  |
| 284 ->300 | -0.10869 |
| 284 ->311 | -0.16402 |

Excited State 204: Singlet-A 3.8548 eV 321.64 nm f=0.1133

|           |          |
|-----------|----------|
| 270 ->300 | 0.10286  |
| 270 ->303 | -0.10922 |
| 272 ->298 | 0.19745  |
| 272 ->299 | -0.10502 |
| 273 ->300 | -0.12262 |
| 273 ->302 | -0.11881 |
| 274 ->298 | -0.13869 |
| 274 ->299 | 0.13385  |
| 275 ->302 | 0.11337  |

|           |          |
|-----------|----------|
| 276 ->294 | 0.11403  |
| 276 ->298 | -0.14130 |
| 276 ->301 | 0.13724  |
| 276 ->304 | -0.10011 |
| 278 ->300 | -0.12906 |
| 279 ->300 | -0.14778 |
| 284 ->311 | -0.13264 |

Excited State 205: Singlet-A 3.8632 eV 320.94 nm f=0.0761

|           |          |
|-----------|----------|
| 269 ->300 | 0.11860  |
| 270 ->302 | 0.10959  |
| 270 ->305 | -0.12683 |
| 274 ->295 | 0.15701  |
| 274 ->298 | 0.16671  |
| 275 ->300 | 0.28234  |
| 275 ->302 | -0.10051 |
| 276 ->295 | 0.11664  |
| 276 ->299 | 0.14243  |
| 278 ->303 | 0.10026  |
| 279 ->305 | 0.14474  |

Excited State 206: Singlet-A 3.8726 eV 320.16 nm f=0.0149

|           |          |
|-----------|----------|
| 274 ->295 | -0.16421 |
| 274 ->298 | 0.11670  |
| 275 ->303 | -0.13217 |
| 276 ->295 | -0.12378 |
| 277 ->295 | 0.12574  |
| 277 ->301 | 0.14448  |
| 277 ->304 | 0.14372  |
| 277 ->309 | -0.10934 |
| 278 ->300 | -0.10805 |
| 278 ->302 | 0.13326  |
| 278 ->303 | -0.13200 |
| 278 ->305 | 0.12155  |
| 279 ->300 | 0.11319  |
| 279 ->302 | -0.15116 |
| 279 ->303 | 0.11564  |
| 283 ->312 | 0.12691  |
| 285 ->302 | -0.13001 |
| 285 ->303 | 0.11635  |
| 285 ->313 | 0.16353  |

Excited State 207: Singlet-A 3.8783 eV 319.69 nm f=0.0000

|           |         |
|-----------|---------|
| 271 ->297 | 0.18727 |
|-----------|---------|

|                    |           |           |           |          |
|--------------------|-----------|-----------|-----------|----------|
| 275 ->297          | 0.10541   |           |           |          |
| 281 ->297          | 0.65946   |           |           |          |
| Excited State 208: | Singlet-A | 3.8802 eV | 319.53 nm | f=0.0005 |
| 271 ->297          | 0.49580   |           |           |          |
| 275 ->297          | 0.26021   |           |           |          |
| 278 ->297          | 0.14222   |           |           |          |
| 279 ->297          | 0.24043   |           |           |          |
| 281 ->297          | -0.25338  |           |           |          |
| Excited State 209: | Singlet-A | 3.8838 eV | 319.23 nm | f=0.0342 |
| 272 ->295          | 0.18903   |           |           |          |
| 274 ->295          | 0.37234   |           |           |          |
| 275 ->300          | -0.11116  |           |           |          |
| 275 ->302          | 0.11375   |           |           |          |
| 276 ->295          | 0.30338   |           |           |          |
| 277 ->295          | -0.19713  |           |           |          |
| 278 ->303          | -0.10710  |           |           |          |
| 279 ->305          | -0.10256  |           |           |          |
| Excited State 210: | Singlet-A | 3.8914 eV | 318.61 nm | f=0.0004 |
| 268 ->296          | -0.10125  |           |           |          |
| 269 ->294          | 0.10323   |           |           |          |
| 269 ->296          | -0.17008  |           |           |          |
| 270 ->294          | 0.10902   |           |           |          |
| 270 ->296          | -0.12725  |           |           |          |
| 273 ->296          | -0.18852  |           |           |          |
| 275 ->294          | -0.11593  |           |           |          |
| 275 ->296          | 0.19299   |           |           |          |
| 278 ->294          | -0.20941  |           |           |          |
| 278 ->296          | -0.26745  |           |           |          |
| 279 ->296          | 0.41164   |           |           |          |
| Excited State 211: | Singlet-A | 3.8921 eV | 318.56 nm | f=0.0012 |
| 268 ->294          | -0.18349  |           |           |          |
| 269 ->294          | -0.19070  |           |           |          |
| 270 ->294          | -0.20305  |           |           |          |
| 275 ->294          | 0.23697   |           |           |          |
| 278 ->294          | 0.40978   |           |           |          |
| 278 ->296          | -0.13917  |           |           |          |
| 279 ->296          | 0.21168   |           |           |          |
| Excited State 212: | Singlet-A | 3.8940 eV | 318.40 nm | f=0.0016 |
| 268 ->291          | 0.12395   |           |           |          |



|                    |           |           |           |          |
|--------------------|-----------|-----------|-----------|----------|
| 268 ->293          | 0.49855   |           |           |          |
| 269 ->293          | 0.33293   |           |           |          |
| 270 ->293          | 0.23127   |           |           |          |
| 275 ->293          | -0.12880  |           |           |          |
| Excited State 213: | Singlet-A | 3.8944 eV | 318.37 nm | f=0.0036 |
| 272 ->294          | 0.20997   |           |           |          |
| 274 ->294          | -0.28077  |           |           |          |
| 276 ->294          | -0.27918  |           |           |          |
| 277 ->294          | 0.48851   |           |           |          |
| Excited State 214: | Singlet-A | 3.8970 eV | 318.15 nm | f=0.0000 |
| 280 ->297          | 0.70619   |           |           |          |
| Excited State 215: | Singlet-A | 3.8996 eV | 317.94 nm | f=0.0039 |
| 267 ->289          | -0.10026  |           |           |          |
| 271 ->295          | 0.10649   |           |           |          |
| 271 ->298          | 0.15415   |           |           |          |
| 271 ->299          | 0.25509   |           |           |          |
| 271 ->301          | 0.21702   |           |           |          |
| 271 ->304          | 0.11237   |           |           |          |
| 285 ->298          | 0.38620   |           |           |          |
| 285 ->301          | -0.11563  |           |           |          |
| Excited State 216: | Singlet-A | 3.9002 eV | 317.89 nm | f=0.0012 |
| 265 ->294          | -0.11901  |           |           |          |
| 274 ->300          | -0.10892  |           |           |          |
| 274 ->302          | -0.14826  |           |           |          |
| 274 ->303          | -0.11515  |           |           |          |
| 276 ->302          | 0.13033   |           |           |          |
| 276 ->303          | 0.13558   |           |           |          |
| 280 ->300          | 0.15518   |           |           |          |
| 280 ->302          | 0.21214   |           |           |          |
| 280 ->303          | 0.19002   |           |           |          |
| 280 ->305          | 0.10050   |           |           |          |
| 280 ->311          | 0.28553   |           |           |          |
| 281 ->302          | -0.13419  |           |           |          |
| 281 ->303          | -0.12108  |           |           |          |
| 281 ->311          | -0.24190  |           |           |          |
| Excited State 217: | Singlet-A | 3.9058 eV | 317.44 nm | f=0.0121 |
| 265 ->294          | 0.25434   |           |           |          |
| 280 ->300          | 0.10262   |           |           |          |
| 280 ->302          | 0.14486   |           |           |          |

|                           |                  |                  |                  |                 |
|---------------------------|------------------|------------------|------------------|-----------------|
| 280 ->303                 | 0.12810          |                  |                  |                 |
| 280 ->311                 | 0.23351          |                  |                  |                 |
| 280 ->314                 | -0.12779         |                  |                  |                 |
| 281 ->300                 | 0.12186          |                  |                  |                 |
| 281 ->302                 | 0.16832          |                  |                  |                 |
| 281 ->303                 | 0.15268          |                  |                  |                 |
| 281 ->311                 | 0.37941          |                  |                  |                 |
| <b>Excited State 218:</b> | <b>Singlet-A</b> | <b>3.9168 eV</b> | <b>316.55 nm</b> | <b>f=0.0032</b> |
| 265 ->287                 | -0.11309         |                  |                  |                 |
| 265 ->288                 | 0.11238          |                  |                  |                 |
| 273 ->302                 | -0.14066         |                  |                  |                 |
| 273 ->303                 | -0.13106         |                  |                  |                 |
| 280 ->298                 | 0.21821          |                  |                  |                 |
| 280 ->299                 | -0.15770         |                  |                  |                 |
| 280 ->306                 | 0.18789          |                  |                  |                 |
| 280 ->307                 | -0.10476         |                  |                  |                 |
| 280 ->310                 | -0.18259         |                  |                  |                 |
| 284 ->311                 | 0.33130          |                  |                  |                 |
| <b>Excited State 219:</b> | <b>Singlet-A</b> | <b>3.9206 eV</b> | <b>316.23 nm</b> | <b>f=0.0022</b> |
| 271 ->297                 | -0.11417         |                  |                  |                 |
| 275 ->297                 | 0.10116          |                  |                  |                 |
| 278 ->297                 | 0.17395          |                  |                  |                 |
| 279 ->297                 | 0.22339          |                  |                  |                 |
| 283 ->298                 | 0.26759          |                  |                  |                 |
| 283 ->299                 | 0.15545          |                  |                  |                 |
| 283 ->309                 | 0.15351          |                  |                  |                 |
| 283 ->312                 | 0.26053          |                  |                  |                 |
| 283 ->315                 | 0.10741          |                  |                  |                 |
| 285 ->313                 | 0.26731          |                  |                  |                 |
| <b>Excited State 220:</b> | <b>Singlet-A</b> | <b>3.9251 eV</b> | <b>315.87 nm</b> | <b>f=0.0005</b> |
| 272 ->294                 | -0.26540         |                  |                  |                 |
| 274 ->294                 | 0.20964          |                  |                  |                 |
| 276 ->294                 | 0.36058          |                  |                  |                 |
| 277 ->294                 | 0.47472          |                  |                  |                 |
| <b>Excited State 221:</b> | <b>Singlet-A</b> | <b>3.9274 eV</b> | <b>315.69 nm</b> | <b>f=0.0114</b> |
| 271 ->297                 | 0.19466          |                  |                  |                 |
| 278 ->297                 | -0.19957         |                  |                  |                 |
| 279 ->297                 | -0.24098         |                  |                  |                 |
| 282 ->300                 | -0.11144         |                  |                  |                 |
| 282 ->302                 | 0.16050          |                  |                  |                 |

|                    |           |           |           |          |
|--------------------|-----------|-----------|-----------|----------|
| 282 ->303          | -0.15209  |           |           |          |
| 282 ->305          | 0.10534   |           |           |          |
| 282 ->313          | -0.23528  |           |           |          |
| 283 ->315          | 0.14597   |           |           |          |
| 285 ->313          | 0.31505   |           |           |          |
| Excited State 222: | Singlet-A | 3.9329 eV | 315.25 nm | f=0.0020 |
| 269 ->294          | 0.14782   |           |           |          |
| 270 ->294          | 0.30239   |           |           |          |
| 273 ->294          | -0.11613  |           |           |          |
| 275 ->294          | 0.48123   |           |           |          |
| 284 ->298          | 0.15425   |           |           |          |
| Excited State 223: | Singlet-A | 3.9356 eV | 315.03 nm | f=0.0032 |
| 271 ->297          | 0.24883   |           |           |          |
| 278 ->297          | -0.24687  |           |           |          |
| 279 ->297          | -0.24463  |           |           |          |
| 282 ->300          | 0.12156   |           |           |          |
| 282 ->302          | -0.17592  |           |           |          |
| 282 ->303          | 0.16673   |           |           |          |
| 282 ->305          | -0.11491  |           |           |          |
| 282 ->313          | 0.20345   |           |           |          |
| 283 ->298          | 0.24917   |           |           |          |
| 283 ->299          | 0.11180   |           |           |          |
| 283 ->315          | -0.16228  |           |           |          |
| Excited State 224: | Singlet-A | 3.9370 eV | 314.92 nm | f=0.0004 |
| 267 ->295          | 0.24386   |           |           |          |
| 271 ->298          | 0.10752   |           |           |          |
| 271 ->299          | 0.14946   |           |           |          |
| 271 ->301          | 0.10926   |           |           |          |
| 275 ->295          | -0.11531  |           |           |          |
| 278 ->295          | 0.17685   |           |           |          |
| 282 ->298          | -0.18128  |           |           |          |
| 282 ->299          | -0.14100  |           |           |          |
| 282 ->312          | -0.14514  |           |           |          |
| 285 ->299          | 0.11504   |           |           |          |
| 285 ->301          | 0.13001   |           |           |          |
| 285 ->312          | 0.25072   |           |           |          |
| 285 ->315          | 0.19825   |           |           |          |
| Excited State 225: | Singlet-A | 3.9459 eV | 314.21 nm | f=0.0043 |
| 265 ->292          | -0.10780  |           |           |          |
| 270 ->294          | -0.11728  |           |           |          |

|           |          |
|-----------|----------|
| 273 ->299 | 0.10466  |
| 273 ->301 | -0.14962 |
| 273 ->304 | 0.10790  |
| 275 ->294 | -0.13488 |
| 279 ->306 | -0.11126 |
| 280 ->311 | -0.10362 |
| 281 ->310 | -0.13277 |
| 284 ->298 | 0.17119  |
| 284 ->301 | -0.14741 |
| 284 ->304 | 0.10923  |
| 284 ->306 | 0.11808  |
| 284 ->310 | 0.19767  |
| 285 ->299 | 0.11062  |

Excited State 226: Singlet-A 3.9473 eV 314.09 nm f=0.0053

|           |          |
|-----------|----------|
| 267 ->295 | -0.11551 |
| 275 ->295 | 0.10069  |
| 282 ->298 | 0.20790  |
| 282 ->299 | 0.15917  |
| 282 ->309 | 0.13246  |
| 282 ->312 | 0.19104  |
| 284 ->306 | -0.10826 |
| 284 ->310 | -0.13064 |
| 285 ->298 | -0.18702 |
| 285 ->299 | 0.16583  |
| 285 ->301 | 0.10383  |
| 285 ->309 | 0.11288  |

Excited State 227: Singlet-A 3.9497 eV 313.91 nm f=0.0849

|           |          |
|-----------|----------|
| 269 ->300 | 0.14172  |
| 269 ->302 | -0.12161 |
| 270 ->300 | -0.14744 |
| 274 ->299 | -0.16951 |
| 275 ->300 | 0.13063  |
| 275 ->302 | -0.11014 |
| 275 ->305 | 0.17142  |
| 276 ->298 | -0.14232 |
| 278 ->300 | 0.14118  |
| 278 ->303 | -0.12014 |
| 279 ->300 | -0.10167 |
| 285 ->300 | 0.18344  |
| 285 ->303 | -0.11132 |
| 285 ->305 | 0.12053  |

|                    |           |           |           |          |
|--------------------|-----------|-----------|-----------|----------|
| Excited State 228: | Singlet-A | 3.9531 eV | 313.64 nm | f=0.0940 |
| 272 ->298          | 0.16349   |           |           |          |
| 275 ->294          | -0.10048  |           |           |          |
| 279 ->299          | -0.10646  |           |           |          |
| 284 ->298          | 0.31975   |           |           |          |
| 284 ->306          | -0.11530  |           |           |          |
| 284 ->310          | -0.10431  |           |           |          |
| 284 ->311          | 0.11366   |           |           |          |
| Excited State 229: | Singlet-A | 3.9553 eV | 313.46 nm | f=0.1814 |
| 270 ->300          | -0.10664  |           |           |          |
| 272 ->298          | 0.23756   |           |           |          |
| 275 ->300          | -0.11083  |           |           |          |
| 275 ->302          | -0.11007  |           |           |          |
| 279 ->305          | 0.13342   |           |           |          |
| 284 ->298          | -0.18482  |           |           |          |
| 284 ->311          | 0.13711   |           |           |          |
| Excited State 230: | Singlet-A | 3.9580 eV | 313.25 nm | f=0.0029 |
| 270 ->300          | -0.12090  |           |           |          |
| 274 ->298          | 0.14315   |           |           |          |
| 275 ->295          | 0.27396   |           |           |          |
| 276 ->298          | -0.12698  |           |           |          |
| 278 ->295          | -0.15592  |           |           |          |
| 279 ->302          | -0.10808  |           |           |          |
| 282 ->298          | -0.15469  |           |           |          |
| 282 ->312          | -0.14347  |           |           |          |
| 284 ->311          | -0.11661  |           |           |          |
| Excited State 231: | Singlet-A | 3.9589 eV | 313.18 nm | f=0.0127 |
| 270 ->300          | 0.10904   |           |           |          |
| 270 ->302          | 0.10474   |           |           |          |
| 272 ->299          | -0.11162  |           |           |          |
| 274 ->298          | -0.17937  |           |           |          |
| 275 ->295          | 0.29844   |           |           |          |
| 276 ->298          | 0.13441   |           |           |          |
| 276 ->299          | -0.10632  |           |           |          |
| 278 ->295          | -0.17201  |           |           |          |
| 282 ->298          | -0.11273  |           |           |          |
| 284 ->311          | 0.15057   |           |           |          |
| Excited State 232: | Singlet-A | 3.9640 eV | 312.78 nm | f=0.0022 |
| 275 ->295          | 0.29356   |           |           |          |
| 278 ->295          | -0.17145  |           |           |          |

|                    |           |           |           |          |
|--------------------|-----------|-----------|-----------|----------|
| 278 ->299          | -0.14861  |           |           |          |
| 281 ->298          | 0.11779   |           |           |          |
| 281 ->310          | -0.11117  |           |           |          |
| 285 ->298          | 0.17910   |           |           |          |
| 285 ->299          | -0.14490  |           |           |          |
| 285 ->304          | 0.13844   |           |           |          |
| 285 ->309          | -0.14764  |           |           |          |
| 285 ->312          | 0.21936   |           |           |          |
| Excited State 233: | Singlet-A | 3.9702 eV | 312.29 nm | f=0.0002 |
| 273 ->299          | -0.11492  |           |           |          |
| 273 ->301          | 0.12632   |           |           |          |
| 281 ->298          | 0.29210   |           |           |          |
| 281 ->299          | -0.20693  |           |           |          |
| 281 ->306          | 0.16524   |           |           |          |
| 281 ->310          | -0.22590  |           |           |          |
| 284 ->298          | -0.23100  |           |           |          |
| 284 ->314          | -0.18894  |           |           |          |
| Excited State 234: | Singlet-A | 3.9768 eV | 311.77 nm | f=0.0027 |
| 259 ->287          | 0.10027   |           |           |          |
| 262 ->286          | -0.10438  |           |           |          |
| 262 ->287          | 0.11576   |           |           |          |
| 262 ->288          | -0.12283  |           |           |          |
| 265 ->286          | 0.19386   |           |           |          |
| 265 ->287          | -0.24652  |           |           |          |
| 265 ->288          | 0.25447   |           |           |          |
| 273 ->300          | 0.10097   |           |           |          |
| 273 ->302          | 0.12786   |           |           |          |
| 284 ->300          | 0.15369   |           |           |          |
| Excited State 235: | Singlet-A | 3.9782 eV | 311.66 nm | f=0.0109 |
| 266 ->295          | -0.13214  |           |           |          |
| 282 ->300          | -0.18759  |           |           |          |
| 282 ->302          | 0.24092   |           |           |          |
| 282 ->303          | -0.19980  |           |           |          |
| 282 ->305          | 0.12574   |           |           |          |
| 283 ->298          | 0.33411   |           |           |          |
| 283 ->301          | -0.16671  |           |           |          |
| 283 ->304          | -0.13839  |           |           |          |
| 285 ->313          | -0.20688  |           |           |          |
| Excited State 236: | Singlet-A | 3.9810 eV | 311.44 nm | f=0.0049 |
| 258 ->289          | 0.12667   |           |           |          |

|                    |           |           |           |          |
|--------------------|-----------|-----------|-----------|----------|
| 260 ->287          | 0.10139   |           |           |          |
| 267 ->286          | 0.17334   |           |           |          |
| 267 ->287          | 0.23065   |           |           |          |
| 267 ->288          | 0.13483   |           |           |          |
| 267 ->289          | 0.27834   |           |           |          |
| 271 ->299          | 0.10889   |           |           |          |
| 274 ->297          | 0.10263   |           |           |          |
| 282 ->298          | 0.11395   |           |           |          |
| 283 ->300          | -0.11981  |           |           |          |
| 283 ->302          | 0.13543   |           |           |          |
| 283 ->303          | -0.10232  |           |           |          |
| Excited State 237: | Singlet-A | 3.9853 eV | 311.10 nm | f=0.0004 |
| 268 ->299          | 0.10231   |           |           |          |
| 269 ->298          | -0.10610  |           |           |          |
| 270 ->294          | -0.12991  |           |           |          |
| 274 ->297          | -0.16327  |           |           |          |
| 275 ->295          | 0.13237   |           |           |          |
| 275 ->301          | 0.12736   |           |           |          |
| 276 ->297          | -0.13674  |           |           |          |
| 279 ->301          | 0.16710   |           |           |          |
| 279 ->308          | 0.22083   |           |           |          |
| 284 ->307          | -0.10201  |           |           |          |
| 285 ->298          | -0.11463  |           |           |          |
| 285 ->308          | -0.10883  |           |           |          |
| Excited State 238: | Singlet-A | 3.9869 eV | 310.98 nm | f=0.0009 |
| 272 ->297          | 0.19926   |           |           |          |
| 274 ->297          | 0.41058   |           |           |          |
| 276 ->297          | 0.34706   |           |           |          |
| 277 ->297          | -0.23445  |           |           |          |
| Excited State 239: | Singlet-A | 3.9925 eV | 310.54 nm | f=0.0051 |
| 270 ->298          | -0.17061  |           |           |          |
| 270 ->299          | 0.10384   |           |           |          |
| 278 ->308          | 0.12594   |           |           |          |
| 279 ->306          | 0.12957   |           |           |          |
| 279 ->307          | 0.24619   |           |           |          |
| 284 ->298          | -0.14528  |           |           |          |
| 284 ->307          | -0.11005  |           |           |          |
| 285 ->298          | 0.16101   |           |           |          |
| 285 ->308          | 0.10788   |           |           |          |
| 285 ->309          | -0.14878  |           |           |          |

|                    |           |           |           |          |
|--------------------|-----------|-----------|-----------|----------|
| Excited State 240: | Singlet-A | 3.9987 eV | 310.06 nm | f=0.0026 |
| 272 ->295          | -0.16129  |           |           |          |
| 274 ->295          | -0.15144  |           |           |          |
| 276 ->295          | 0.29344   |           |           |          |
| 283 ->300          | -0.25798  |           |           |          |
| 283 ->302          | 0.28100   |           |           |          |
| 283 ->303          | -0.20018  |           |           |          |
| 283 ->305          | 0.11196   |           |           |          |
| 283 ->313          | 0.21289   |           |           |          |
| Excited State 241: | Singlet-A | 3.9990 eV | 310.04 nm | f=0.0012 |
| 272 ->295          | -0.25518  |           |           |          |
| 274 ->295          | -0.23882  |           |           |          |
| 276 ->295          | 0.46378   |           |           |          |
| 283 ->300          | 0.17638   |           |           |          |
| 283 ->302          | -0.19390  |           |           |          |
| 283 ->303          | 0.13450   |           |           |          |
| 283 ->313          | -0.14086  |           |           |          |
| Excited State 242: | Singlet-A | 4.0071 eV | 309.41 nm | f=0.0186 |
| 264 ->287          | 0.11973   |           |           |          |
| 264 ->289          | 0.13404   |           |           |          |
| 266 ->286          | 0.16360   |           |           |          |
| 266 ->287          | 0.21262   |           |           |          |
| 266 ->288          | 0.11991   |           |           |          |
| 266 ->289          | 0.24829   |           |           |          |
| 285 ->300          | -0.20037  |           |           |          |
| 285 ->302          | 0.10398   |           |           |          |
| 285 ->313          | 0.10621   |           |           |          |
| Excited State 243: | Singlet-A | 4.0086 eV | 309.29 nm | f=0.0039 |
| 280 ->300          | -0.19089  |           |           |          |
| 280 ->302          | -0.20827  |           |           |          |
| 280 ->303          | -0.14332  |           |           |          |
| 280 ->311          | 0.49326   |           |           |          |
| 281 ->314          | -0.13279  |           |           |          |
| Excited State 244: | Singlet-A | 4.0174 eV | 308.62 nm | f=0.0007 |
| 272 ->294          | 0.54489   |           |           |          |
| 274 ->294          | 0.41069   |           |           |          |
| 276 ->294          | 0.11255   |           |           |          |
| Excited State 245: | Singlet-A | 4.0244 eV | 308.08 nm | f=0.0715 |
| 261 ->286          | -0.10293  |           |           |          |



|                    |           |           |           |          |
|--------------------|-----------|-----------|-----------|----------|
| 262 ->286          | 0.12535   |           |           |          |
| 262 ->288          | -0.10402  |           |           |          |
| 273 ->302          | 0.10476   |           |           |          |
| 280 ->298          | 0.23707   |           |           |          |
| 280 ->301          | -0.14665  |           |           |          |
| 280 ->304          | 0.15225   |           |           |          |
| 280 ->306          | 0.16887   |           |           |          |
| 280 ->307          | -0.11146  |           |           |          |
| 281 ->300          | -0.10868  |           |           |          |
| 281 ->302          | -0.11869  |           |           |          |
| 281 ->311          | 0.13387   |           |           |          |
| 284 ->300          | -0.16799  |           |           |          |
| 284 ->311          | -0.13640  |           |           |          |
| Excited State 246: | Singlet-A | 4.0291 eV | 307.72 nm | f=0.0021 |
| 261 ->286          | -0.11737  |           |           |          |
| 262 ->286          | 0.14390   |           |           |          |
| 265 ->296          | 0.11111   |           |           |          |
| 273 ->298          | 0.11795   |           |           |          |
| 273 ->299          | -0.13302  |           |           |          |
| 281 ->302          | 0.10000   |           |           |          |
| 284 ->299          | 0.31564   |           |           |          |
| Excited State 247: | Singlet-A | 4.0298 eV | 307.67 nm | f=0.0026 |
| 265 ->294          | 0.24967   |           |           |          |
| 268 ->296          | -0.11258  |           |           |          |
| 269 ->296          | -0.11761  |           |           |          |
| 270 ->296          | -0.11880  |           |           |          |
| 275 ->296          | 0.14881   |           |           |          |
| 278 ->296          | 0.25963   |           |           |          |
| 281 ->300          | -0.21612  |           |           |          |
| 281 ->302          | -0.23920  |           |           |          |
| 281 ->303          | -0.17494  |           |           |          |
| 284 ->299          | 0.16500   |           |           |          |
| Excited State 248: | Singlet-A | 4.0306 eV | 307.60 nm | f=0.0413 |
| 266 ->295          | -0.14225  |           |           |          |
| 267 ->297          | -0.11864  |           |           |          |
| 277 ->304          | 0.10341   |           |           |          |
| 277 ->309          | -0.14446  |           |           |          |
| 283 ->298          | -0.17386  |           |           |          |
| 283 ->299          | 0.17662   |           |           |          |
| 283 ->301          | 0.12778   |           |           |          |
| 283 ->312          | 0.23555   |           |           |          |

|                    |           |           |           |          |  |
|--------------------|-----------|-----------|-----------|----------|--|
| 285 ->313          |           | -0.11095  |           |          |  |
| Excited State 249: | Singlet-A | 4.0316 eV | 307.53 nm | f=0.0057 |  |
| 272 ->296          |           | 0.18227   |           |          |  |
| 274 ->296          |           | -0.24901  |           |          |  |
| 276 ->296          |           | -0.24108  |           |          |  |
| 277 ->296          |           | 0.46385   |           |          |  |
| 278 ->296          |           | 0.13475   |           |          |  |
| Excited State 250: | Singlet-A | 4.0325 eV | 307.46 nm | f=0.0166 |  |
| 261 ->286          |           | 0.13544   |           |          |  |
| 262 ->286          |           | -0.13956  |           |          |  |
| 272 ->296          |           | 0.10131   |           |          |  |
| 274 ->296          |           | -0.14039  |           |          |  |
| 276 ->296          |           | -0.11692  |           |          |  |
| 277 ->296          |           | 0.21797   |           |          |  |
| 278 ->296          |           | -0.10580  |           |          |  |
| 284 ->299          |           | 0.16485   |           |          |  |
| Excited State 251: | Singlet-A | 4.0332 eV | 307.41 nm | f=0.0007 |  |
| 260 ->286          |           | -0.15675  |           |          |  |
| 267 ->295          |           | 0.17044   |           |          |  |
| 269 ->295          |           | 0.17695   |           |          |  |
| 275 ->301          |           | -0.10684  |           |          |  |
| 275 ->308          |           | -0.12846  |           |          |  |
| 278 ->298          |           | 0.12823   |           |          |  |
| 282 ->298          |           | 0.18914   |           |          |  |
| 282 ->301          |           | -0.11710  |           |          |  |
| 285 ->299          |           | -0.11105  |           |          |  |
| Excited State 252: | Singlet-A | 4.0406 eV | 306.84 nm | f=0.0059 |  |
| 267 ->293          |           | 0.12679   |           |          |  |
| 277 ->304          |           | 0.10533   |           |          |  |
| 277 ->309          |           | -0.15184  |           |          |  |
| 282 ->313          |           | -0.10892  |           |          |  |
| 283 ->298          |           | 0.22335   |           |          |  |
| 283 ->299          |           | -0.19504  |           |          |  |
| 283 ->309          |           | -0.10059  |           |          |  |
| 285 ->300          |           | -0.20412  |           |          |  |
| 285 ->303          |           | 0.10897   |           |          |  |
| Excited State 253: | Singlet-A | 4.0417 eV | 306.76 nm | f=0.0091 |  |
| 265 ->294          |           | -0.14204  |           |          |  |
| 268 ->296          |           | -0.13325  |           |          |  |

|                    |           |           |           |          |
|--------------------|-----------|-----------|-----------|----------|
| 269 ->296          | -0.13362  |           |           |          |
| 270 ->296          | -0.11827  |           |           |          |
| 275 ->296          | 0.28522   |           |           |          |
| 278 ->296          | 0.31084   |           |           |          |
| 281 ->300          | 0.17968   |           |           |          |
| 281 ->302          | 0.19778   |           |           |          |
| 281 ->303          | 0.13736   |           |           |          |
| 284 ->311          | -0.10906  |           |           |          |
| Excited State 254: | Singlet-A | 4.0435 eV | 306.62 nm | f=0.0090 |
| 261 ->287          | 0.12458   |           |           |          |
| 262 ->287          | -0.10741  |           |           |          |
| 269 ->295          | 0.14287   |           |           |          |
| 272 ->299          | -0.13155  |           |           |          |
| 278 ->309          | -0.10488  |           |           |          |
| 279 ->300          | -0.11257  |           |           |          |
| 285 ->300          | -0.11192  |           |           |          |
| Excited State 255: | Singlet-A | 4.0453 eV | 306.49 nm | f=0.0060 |
| 267 ->295          | 0.12589   |           |           |          |
| 269 ->295          | 0.19961   |           |           |          |
| 271 ->309          | -0.11181  |           |           |          |
| 285 ->300          | 0.16841   |           |           |          |
| 285 ->312          | -0.10299  |           |           |          |
| Excited State 256: | Singlet-A | 4.0495 eV | 306.17 nm | f=0.0043 |
| 260 ->286          | 0.12396   |           |           |          |
| 263 ->286          | 0.10204   |           |           |          |
| 264 ->295          | -0.12514  |           |           |          |
| 282 ->298          | 0.11384   |           |           |          |
| 282 ->300          | -0.16633  |           |           |          |
| 282 ->302          | 0.16098   |           |           |          |
| 282 ->303          | -0.10767  |           |           |          |
| 282 ->313          | 0.29895   |           |           |          |
| 283 ->298          | -0.13441  |           |           |          |
| 283 ->299          | 0.15338   |           |           |          |
| 283 ->315          | -0.19213  |           |           |          |
| 285 ->300          | -0.11745  |           |           |          |
| 285 ->303          | 0.10658   |           |           |          |
| Excited State 257: | Singlet-A | 4.0516 eV | 306.01 nm | f=0.0006 |
| 255 ->288          | -0.10897  |           |           |          |
| 258 ->286          | -0.13657  |           |           |          |
| 260 ->286          | 0.18682   |           |           |          |

|                    |           |           |           |          |
|--------------------|-----------|-----------|-----------|----------|
| 263 ->286          | 0.17401   |           |           |          |
| 263 ->287          | -0.14450  |           |           |          |
| 282 ->298          | 0.11131   |           |           |          |
| 282 ->312          | -0.11352  |           |           |          |
| 282 ->313          | -0.13700  |           |           |          |
| 283 ->315          | 0.10732   |           |           |          |
| Excited State 258: | Singlet-A | 4.0555 eV | 305.72 nm | f=0.0027 |
| 267 ->293          | 0.10796   |           |           |          |
| 277 ->298          | -0.10122  |           |           |          |
| 277 ->304          | 0.11848   |           |           |          |
| 277 ->309          | -0.13012  |           |           |          |
| 282 ->298          | 0.11120   |           |           |          |
| 282 ->313          | 0.13909   |           |           |          |
| 285 ->299          | 0.12085   |           |           |          |
| 285 ->300          | 0.21573   |           |           |          |
| 285 ->303          | -0.13004  |           |           |          |
| 285 ->305          | 0.10476   |           |           |          |
| 285 ->309          | -0.10041  |           |           |          |
| 285 ->313          | 0.10282   |           |           |          |
| Excited State 259: | Singlet-A | 4.0565 eV | 305.64 nm | f=0.0016 |
| 260 ->286          | 0.11568   |           |           |          |
| 267 ->295          | -0.14184  |           |           |          |
| 275 ->301          | -0.10345  |           |           |          |
| 275 ->308          | -0.13635  |           |           |          |
| 278 ->299          | -0.10032  |           |           |          |
| 282 ->298          | -0.12075  |           |           |          |
| 285 ->299          | -0.15412  |           |           |          |
| 285 ->300          | 0.15739   |           |           |          |
| 285 ->301          | 0.10467   |           |           |          |
| 285 ->309          | 0.16674   |           |           |          |
| Excited State 260: | Singlet-A | 4.0591 eV | 305.45 nm | f=0.0001 |
| 266 ->295          | 0.10975   |           |           |          |
| 267 ->297          | -0.12124  |           |           |          |
| 271 ->297          | -0.12435  |           |           |          |
| 275 ->297          | 0.50377   |           |           |          |
| 278 ->297          | -0.32035  |           |           |          |
| 283 ->299          | -0.11199  |           |           |          |
| Excited State 261: | Singlet-A | 4.0597 eV | 305.40 nm | f=0.0004 |
| 269 ->295          | -0.10188  |           |           |          |
| 270 ->306          | -0.11153  |           |           |          |

|                    |           |           |           |          |
|--------------------|-----------|-----------|-----------|----------|
| 273 ->307          | 0.10755   |           |           |          |
| 275 ->299          | 0.10070   |           |           |          |
| 275 ->307          | -0.13808  |           |           |          |
| 282 ->298          | 0.23661   |           |           |          |
| 282 ->301          | -0.11547  |           |           |          |
| 282 ->312          | -0.12174  |           |           |          |
| 282 ->315          | -0.13157  |           |           |          |
| 284 ->314          | 0.11019   |           |           |          |
| 285 ->315          | 0.11016   |           |           |          |
| Excited State 262: | Singlet-A | 4.0635 eV | 305.12 nm | f=0.0000 |
| 272 ->296          | -0.27091  |           |           |          |
| 274 ->296          | 0.23077   |           |           |          |
| 276 ->296          | 0.37252   |           |           |          |
| 277 ->296          | 0.44671   |           |           |          |
| Excited State 263: | Singlet-A | 4.0643 eV | 305.06 nm | f=0.0003 |
| 267 ->295          | -0.11371  |           |           |          |
| 269 ->295          | -0.14410  |           |           |          |
| 270 ->294          | -0.10440  |           |           |          |
| 271 ->294          | 0.10456   |           |           |          |
| 271 ->309          | -0.11716  |           |           |          |
| 275 ->307          | 0.11197   |           |           |          |
| 279 ->306          | 0.10872   |           |           |          |
| 282 ->298          | 0.16321   |           |           |          |
| 282 ->315          | -0.12216  |           |           |          |
| 285 ->299          | -0.12039  |           |           |          |
| 285 ->309          | 0.15656   |           |           |          |
| 285 ->315          | 0.19244   |           |           |          |
| Excited State 264: | Singlet-A | 4.0654 eV | 304.97 nm | f=0.0005 |
| 263 ->288          | 0.10052   |           |           |          |
| 268 ->294          | -0.10888  |           |           |          |
| 269 ->294          | -0.15375  |           |           |          |
| 270 ->294          | 0.14856   |           |           |          |
| 270 ->298          | 0.10291   |           |           |          |
| 270 ->301          | -0.12174  |           |           |          |
| 270 ->307          | -0.14452  |           |           |          |
| 271 ->294          | -0.13302  |           |           |          |
| 273 ->306          | 0.19769   |           |           |          |
| 275 ->294          | -0.10689  |           |           |          |
| 275 ->306          | -0.11854  |           |           |          |
| 279 ->307          | -0.11874  |           |           |          |
| 284 ->299          | -0.15341  |           |           |          |

|                    |           |           |           |          |
|--------------------|-----------|-----------|-----------|----------|
| Excited State 265: | Singlet-A | 4.0685 eV | 304.74 nm | f=0.0031 |
| 274 ->301          | -0.13104  |           |           |          |
| 275 ->296          | -0.12396  |           |           |          |
| 276 ->299          | -0.13759  |           |           |          |
| 276 ->307          | 0.12224   |           |           |          |
| 279 ->300          | 0.20466   |           |           |          |
| 279 ->302          | 0.14866   |           |           |          |
| 280 ->310          | 0.11555   |           |           |          |
| 284 ->300          | 0.30594   |           |           |          |
| 284 ->303          | -0.10724  |           |           |          |

|                    |           |           |           |          |
|--------------------|-----------|-----------|-----------|----------|
| Excited State 266: | Singlet-A | 4.0723 eV | 304.46 nm | f=0.0020 |
| 260 ->286          | 0.11040   |           |           |          |
| 260 ->289          | -0.10220  |           |           |          |
| 269 ->294          | 0.10602   |           |           |          |
| 269 ->295          | 0.11249   |           |           |          |
| 270 ->294          | -0.13511  |           |           |          |
| 271 ->294          | 0.11595   |           |           |          |
| 273 ->306          | 0.10620   |           |           |          |
| 274 ->298          | -0.10025  |           |           |          |
| 276 ->299          | 0.16098   |           |           |          |
| 284 ->300          | 0.16131   |           |           |          |

|                    |           |           |           |          |
|--------------------|-----------|-----------|-----------|----------|
| Excited State 267: | Singlet-A | 4.0731 eV | 304.39 nm | f=0.0021 |
| 255 ->287          | 0.10213   |           |           |          |
| 256 ->286          | 0.10514   |           |           |          |
| 260 ->286          | -0.13048  |           |           |          |
| 260 ->287          | -0.12641  |           |           |          |
| 260 ->289          | 0.11109   |           |           |          |
| 263 ->287          | -0.13644  |           |           |          |
| 263 ->288          | 0.11612   |           |           |          |
| 276 ->299          | 0.13663   |           |           |          |
| 281 ->314          | 0.11890   |           |           |          |
| 284 ->299          | 0.12632   |           |           |          |
| 284 ->300          | 0.17543   |           |           |          |
| 284 ->314          | 0.13728   |           |           |          |

|                    |           |           |           |          |
|--------------------|-----------|-----------|-----------|----------|
| Excited State 268: | Singlet-A | 4.0740 eV | 304.33 nm | f=0.0009 |
| 265 ->296          | 0.14381   |           |           |          |
| 268 ->294          | -0.12469  |           |           |          |
| 269 ->294          | -0.16595  |           |           |          |
| 270 ->294          | 0.20587   |           |           |          |
| 271 ->294          | -0.19377  |           |           |          |

|                    |           |           |           |          |
|--------------------|-----------|-----------|-----------|----------|
| 275 ->299          | -0.11169  |           |           |          |
| 276 ->299          | 0.10624   |           |           |          |
| 281 ->314          | -0.17612  |           |           |          |
| 284 ->300          | 0.14381   |           |           |          |
| 284 ->314          | -0.15336  |           |           |          |
| Excited State 269: | Singlet-A | 4.0772 eV | 304.09 nm | f=0.0031 |
| 265 ->296          | -0.14738  |           |           |          |
| 269 ->294          | -0.12797  |           |           |          |
| 270 ->294          | 0.14840   |           |           |          |
| 271 ->294          | -0.16097  |           |           |          |
| 280 ->311          | 0.10749   |           |           |          |
| 281 ->314          | 0.29133   |           |           |          |
| 281 ->316          | -0.13140  |           |           |          |
| 284 ->314          | 0.19426   |           |           |          |
| Excited State 270: | Singlet-A | 4.0788 eV | 303.97 nm | f=0.0105 |
| 266 ->295          | -0.11428  |           |           |          |
| 267 ->297          | 0.13152   |           |           |          |
| 272 ->295          | 0.39757   |           |           |          |
| 274 ->295          | -0.32088  |           |           |          |
| 275 ->297          | 0.10608   |           |           |          |
| Excited State 271: | Singlet-A | 4.0811 eV | 303.80 nm | f=0.0011 |
| 269 ->299          | -0.11899  |           |           |          |
| 269 ->308          | -0.10167  |           |           |          |
| 270 ->299          | 0.10486   |           |           |          |
| 271 ->294          | 0.12283   |           |           |          |
| 275 ->301          | -0.12460  |           |           |          |
| 275 ->308          | -0.15400  |           |           |          |
| 282 ->298          | 0.10042   |           |           |          |
| 285 ->299          | 0.23595   |           |           |          |
| 285 ->301          | -0.17405  |           |           |          |
| 285 ->309          | -0.15137  |           |           |          |
| 285 ->312          | 0.10134   |           |           |          |
| Excited State 272: | Singlet-A | 4.0839 eV | 303.59 nm | f=0.0003 |
| 269 ->296          | 0.22167   |           |           |          |
| 270 ->296          | 0.37728   |           |           |          |
| 275 ->296          | 0.42152   |           |           |          |
| 281 ->314          | 0.11481   |           |           |          |
| Excited State 273: | Singlet-A | 4.0845 eV | 303.55 nm | f=0.0059 |
| 266 ->295          | 0.12982   |           |           |          |

|                    |           |           |           |          |
|--------------------|-----------|-----------|-----------|----------|
| 267 ->297          | -0.23259  |           |           |          |
| 272 ->295          | 0.33535   |           |           |          |
| 274 ->295          | -0.19366  |           |           |          |
| 275 ->297          | -0.13904  |           |           |          |
| 282 ->313          | 0.11872   |           |           |          |
| 283 ->299          | -0.15132  |           |           |          |
| 283 ->315          | 0.13299   |           |           |          |
| Excited State 274: | Singlet-A | 4.0880 eV | 303.29 nm | f=0.0006 |
| 265 ->296          | -0.13013  |           |           |          |
| 273 ->306          | 0.11162   |           |           |          |
| 273 ->307          | -0.10849  |           |           |          |
| 281 ->298          | 0.37707   |           |           |          |
| 281 ->299          | 0.10499   |           |           |          |
| 281 ->301          | -0.17547  |           |           |          |
| 281 ->314          | -0.27903  |           |           |          |
| 281 ->316          | 0.12578   |           |           |          |
| 284 ->314          | 0.15810   |           |           |          |
| Excited State 275: | Singlet-A | 4.0905 eV | 303.10 nm | f=0.0100 |
| 267 ->297          | 0.24020   |           |           |          |
| 271 ->302          | 0.10300   |           |           |          |
| 272 ->295          | 0.11907   |           |           |          |
| 272 ->298          | -0.11745  |           |           |          |
| 275 ->297          | 0.11570   |           |           |          |
| 276 ->301          | 0.15869   |           |           |          |
| 280 ->310          | 0.10622   |           |           |          |
| 283 ->299          | 0.10381   |           |           |          |
| 283 ->315          | -0.14180  |           |           |          |
| 285 ->313          | 0.12597   |           |           |          |
| Excited State 276: | Singlet-A | 4.0935 eV | 302.88 nm | f=0.0002 |
| 267 ->295          | 0.11109   |           |           |          |
| 273 ->295          | 0.65280   |           |           |          |
| 276 ->297          | -0.12521  |           |           |          |
| Excited State 277: | Singlet-A | 4.0955 eV | 302.73 nm | f=0.0030 |
| 267 ->297          | 0.12534   |           |           |          |
| 271 ->302          | 0.14686   |           |           |          |
| 271 ->303          | -0.12515  |           |           |          |
| 272 ->297          | -0.12151  |           |           |          |
| 272 ->298          | 0.11650   |           |           |          |
| 274 ->297          | -0.11061  |           |           |          |
| 276 ->297          | 0.20422   |           |           |          |



|                    |           |           |           |          |
|--------------------|-----------|-----------|-----------|----------|
| 276 ->301          | -0.10170  |           |           |          |
| 279 ->303          | -0.14125  |           |           |          |
| 280 ->310          | -0.10440  |           |           |          |
| 285 ->313          | 0.12145   |           |           |          |
| Excited State 278: | Singlet-A | 4.0968 eV | 302.64 nm | f=0.0005 |
| 267 ->297          | -0.10885  |           |           |          |
| 269 ->295          | 0.16666   |           |           |          |
| 272 ->297          | -0.22475  |           |           |          |
| 273 ->295          | 0.16627   |           |           |          |
| 274 ->297          | -0.23889  |           |           |          |
| 276 ->297          | 0.43026   |           |           |          |
| Excited State 279: | Singlet-A | 4.0980 eV | 302.55 nm | f=0.0001 |
| 255 ->286          | 0.24472   |           |           |          |
| 256 ->287          | 0.13129   |           |           |          |
| 258 ->286          | -0.13719  |           |           |          |
| 258 ->288          | 0.18373   |           |           |          |
| 260 ->287          | -0.17874  |           |           |          |
| 260 ->288          | -0.18434  |           |           |          |
| 260 ->289          | 0.15082   |           |           |          |
| 263 ->288          | -0.22254  |           |           |          |
| 276 ->297          | 0.16032   |           |           |          |
| Excited State 280: | Singlet-A | 4.1021 eV | 302.24 nm | f=0.0004 |
| 260 ->289          | 0.10653   |           |           |          |
| 267 ->295          | -0.25781  |           |           |          |
| 269 ->295          | 0.33265   |           |           |          |
| 270 ->295          | -0.16888  |           |           |          |
| 271 ->294          | -0.10194  |           |           |          |
| 274 ->297          | 0.10881   |           |           |          |
| 276 ->297          | -0.12962  |           |           |          |
| 282 ->315          | -0.11308  |           |           |          |
| 285 ->315          | 0.21702   |           |           |          |
| Excited State 281: | Singlet-A | 4.1037 eV | 302.13 nm | f=0.0000 |
| 269 ->294          | -0.23347  |           |           |          |
| 270 ->294          | 0.27562   |           |           |          |
| 271 ->294          | 0.56236   |           |           |          |
| Excited State 282: | Singlet-A | 4.1089 eV | 301.75 nm | f=0.0004 |
| 259 ->286          | -0.10485  |           |           |          |
| 262 ->287          | 0.11040   |           |           |          |
| 265 ->294          | 0.16955   |           |           |          |

|                    |           |           |           |          |
|--------------------|-----------|-----------|-----------|----------|
| 272 ->299          | -0.14347  |           |           |          |
| 272 ->307          | 0.10955   |           |           |          |
| 274 ->301          | -0.12735  |           |           |          |
| 278 ->298          | -0.13093  |           |           |          |
| 279 ->299          | -0.10785  |           |           |          |
| 281 ->311          | -0.13337  |           |           |          |
| Excited State 283: | Singlet-A | 4.1113 eV | 301.57 nm | f=0.0004 |
| 265 ->294          | 0.12997   |           |           |          |
| 269 ->295          | 0.11037   |           |           |          |
| 270 ->298          | 0.10105   |           |           |          |
| 278 ->298          | 0.18926   |           |           |          |
| 279 ->299          | 0.14794   |           |           |          |
| 279 ->307          | 0.12304   |           |           |          |
| 284 ->299          | 0.12315   |           |           |          |
| 284 ->301          | 0.17988   |           |           |          |
| Excited State 284: | Singlet-A | 4.1149 eV | 301.30 nm | f=0.0009 |
| 278 ->298          | -0.18277  |           |           |          |
| 279 ->299          | -0.18071  |           |           |          |
| 279 ->307          | -0.13824  |           |           |          |
| 281 ->298          | -0.13234  |           |           |          |
| 281 ->299          | -0.11140  |           |           |          |
| 281 ->310          | -0.10356  |           |           |          |
| 284 ->299          | 0.17667   |           |           |          |
| 284 ->301          | 0.30778   |           |           |          |
| 284 ->306          | 0.15843   |           |           |          |
| Excited State 285: | Singlet-A | 4.1208 eV | 300.88 nm | f=0.0023 |
| 274 ->306          | -0.12315  |           |           |          |
| 276 ->306          | 0.13716   |           |           |          |
| 280 ->298          | 0.42031   |           |           |          |
| 280 ->299          | 0.20689   |           |           |          |
| 280 ->301          | -0.15677  |           |           |          |
| 280 ->306          | -0.20315  |           |           |          |
| 280 ->307          | 0.10200   |           |           |          |
| Excited State 286: | Singlet-A | 4.1230 eV | 300.71 nm | f=0.0008 |
| 266 ->297          | -0.11360  |           |           |          |
| 282 ->298          | -0.22065  |           |           |          |
| 282 ->299          | 0.31730   |           |           |          |
| 282 ->315          | -0.27887  |           |           |          |
| 284 ->301          | 0.12103   |           |           |          |
| 285 ->301          | -0.11952  |           |           |          |

|                    |           |           |           |          |
|--------------------|-----------|-----------|-----------|----------|
| 285 ->312          | -0.10519  |           |           |          |
| 285 ->315          | 0.22340   |           |           |          |
| Excited State 287: | Singlet-A | 4.1234 eV | 300.69 nm | f=0.0138 |
| 262 ->294          | 0.14555   |           |           |          |
| 265 ->294          | 0.29509   |           |           |          |
| 272 ->299          | 0.12739   |           |           |          |
| 274 ->298          | -0.11916  |           |           |          |
| 274 ->301          | 0.16823   |           |           |          |
| 276 ->304          | 0.13282   |           |           |          |
| 280 ->306          | 0.14572   |           |           |          |
| 280 ->314          | 0.13788   |           |           |          |
| 281 ->311          | -0.14478  |           |           |          |
| 284 ->311          | -0.14007  |           |           |          |
| Excited State 288: | Singlet-A | 4.1294 eV | 300.25 nm | f=0.0005 |
| 266 ->295          | -0.25709  |           |           |          |
| 267 ->297          | 0.11728   |           |           |          |
| 283 ->299          | -0.29846  |           |           |          |
| 283 ->301          | 0.34479   |           |           |          |
| 283 ->304          | 0.24636   |           |           |          |
| 283 ->312          | 0.17472   |           |           |          |
| Excited State 289: | Singlet-A | 4.1308 eV | 300.15 nm | f=0.0008 |
| 265 ->294          | -0.16858  |           |           |          |
| 273 ->300          | -0.13167  |           |           |          |
| 273 ->302          | -0.13376  |           |           |          |
| 278 ->300          | 0.14394   |           |           |          |
| 278 ->302          | 0.13285   |           |           |          |
| 279 ->303          | 0.18283   |           |           |          |
| 279 ->305          | 0.12921   |           |           |          |
| 280 ->298          | 0.13596   |           |           |          |
| 280 ->310          | 0.10067   |           |           |          |
| 280 ->314          | -0.10570  |           |           |          |
| 281 ->299          | -0.10437  |           |           |          |
| 281 ->311          | 0.12146   |           |           |          |
| 284 ->302          | 0.16855   |           |           |          |
| 284 ->303          | 0.14107   |           |           |          |
| 285 ->302          | 0.12259   |           |           |          |
| 285 ->305          | -0.11823  |           |           |          |
| Excited State 290: | Singlet-A | 4.1378 eV | 299.64 nm | f=0.0002 |
| 265 ->296          | 0.19496   |           |           |          |
| 281 ->298          | 0.23615   |           |           |          |

|                    |           |           |           |          |
|--------------------|-----------|-----------|-----------|----------|
| 281 ->299          | 0.28229   |           |           |          |
| 281 ->301          | -0.12980  |           |           |          |
| 281 ->310          | 0.17037   |           |           |          |
| 281 ->314          | 0.27862   |           |           |          |
| 281 ->316          | -0.11006  |           |           |          |
| 284 ->314          | -0.13612  |           |           |          |
| Excited State 291: | Singlet-A | 4.1399 eV | 299.48 nm | f=0.0002 |
| 283 ->300          | 0.53379   |           |           |          |
| 283 ->303          | -0.31244  |           |           |          |
| 283 ->305          | 0.23475   |           |           |          |
| Excited State 292: | Singlet-A | 4.1437 eV | 299.21 nm | f=0.0051 |
| 268 ->300          | -0.10655  |           |           |          |
| 278 ->305          | -0.12591  |           |           |          |
| 284 ->300          | 0.13468   |           |           |          |
| 284 ->302          | -0.18346  |           |           |          |
| 285 ->300          | 0.25956   |           |           |          |
| 285 ->302          | 0.38438   |           |           |          |
| 285 ->305          | -0.26506  |           |           |          |
| Excited State 293: | Singlet-A | 4.1481 eV | 298.89 nm | f=0.0016 |
| 264 ->293          | 0.19524   |           |           |          |
| 266 ->291          | 0.11383   |           |           |          |
| 266 ->293          | 0.28129   |           |           |          |
| 266 ->297          | 0.18911   |           |           |          |
| 271 ->304          | -0.11039  |           |           |          |
| 271 ->309          | 0.13737   |           |           |          |
| 278 ->304          | 0.10161   |           |           |          |
| 279 ->301          | -0.14969  |           |           |          |
| 285 ->308          | -0.10574  |           |           |          |
| 285 ->309          | 0.13230   |           |           |          |
| Excited State 294: | Singlet-A | 4.1522 eV | 298.60 nm | f=0.0004 |
| 272 ->300          | -0.26231  |           |           |          |
| 272 ->303          | 0.14997   |           |           |          |
| 274 ->300          | 0.26452   |           |           |          |
| 274 ->303          | -0.20489  |           |           |          |
| 274 ->305          | -0.19095  |           |           |          |
| 276 ->300          | -0.11977  |           |           |          |
| 276 ->303          | 0.15309   |           |           |          |
| 276 ->305          | 0.18917   |           |           |          |
| 280 ->300          | 0.22502   |           |           |          |
| 280 ->303          | -0.14722  |           |           |          |

|                    |           |           |           |          |
|--------------------|-----------|-----------|-----------|----------|
| 280 ->305          | -0.11767  |           |           |          |
| Excited State 295: | Singlet-A | 4.1536 eV | 298.50 nm | f=0.0027 |
| 264 ->293          | -0.12075  |           |           |          |
| 264 ->297          | -0.13224  |           |           |          |
| 266 ->297          | 0.32486   |           |           |          |
| 274 ->297          | 0.11131   |           |           |          |
| 282 ->299          | 0.15060   |           |           |          |
| 282 ->315          | -0.31639  |           |           |          |
| 285 ->315          | -0.23432  |           |           |          |
| Excited State 296: | Singlet-A | 4.1561 eV | 298.32 nm | f=0.0000 |
| 272 ->296          | 0.56244   |           |           |          |
| 274 ->296          | 0.40330   |           |           |          |
| 276 ->296          | 0.10627   |           |           |          |
| Excited State 297: | Singlet-A | 4.1691 eV | 297.39 nm | f=0.0009 |
| 262 ->290          | -0.11170  |           |           |          |
| 264 ->297          | -0.10776  |           |           |          |
| 265 ->292          | 0.12422   |           |           |          |
| 266 ->297          | 0.16983   |           |           |          |
| 269 ->298          | -0.14715  |           |           |          |
| 278 ->298          | 0.10714   |           |           |          |
| 279 ->301          | 0.22048   |           |           |          |
| 279 ->304          | -0.12355  |           |           |          |
| 284 ->299          | 0.10824   |           |           |          |
| 285 ->301          | 0.16468   |           |           |          |
| Excited State 298: | Singlet-A | 4.1731 eV | 297.10 nm | f=0.0004 |
| 263 ->292          | -0.12698  |           |           |          |
| 272 ->298          | -0.14209  |           |           |          |
| 272 ->299          | -0.12241  |           |           |          |
| 274 ->301          | -0.10721  |           |           |          |
| 274 ->306          | -0.10583  |           |           |          |
| 276 ->304          | -0.11497  |           |           |          |
| 276 ->306          | 0.19960   |           |           |          |
| 278 ->300          | 0.10077   |           |           |          |
| 279 ->303          | 0.11044   |           |           |          |
| 280 ->310          | -0.17366  |           |           |          |
| 284 ->300          | -0.10273  |           |           |          |
| 284 ->302          | 0.23062   |           |           |          |
| 284 ->305          | -0.12708  |           |           |          |
| Excited State 299: | Singlet-A | 4.1749 eV | 296.97 nm | f=0.0009 |

|           |          |
|-----------|----------|
| 263 ->294 | 0.11954  |
| 268 ->294 | 0.35504  |
| 269 ->294 | -0.28651 |
| 270 ->295 | -0.29666 |

|                    |           |           |           |          |
|--------------------|-----------|-----------|-----------|----------|
| Excited State 300: | Singlet-A | 4.1752 eV | 296.95 nm | f=0.0002 |
| 269 ->297          | -0.27823  |           |           |          |
| 270 ->295          | -0.11603  |           |           |          |
| 270 ->297          | 0.10767   |           |           |          |
| 272 ->297          | 0.42607   |           |           |          |
| 274 ->297          | -0.28312  |           |           |          |

**Orbital coefficients of atoms corresponding to peaks 1 and 2 in absorption spectrum of cluster 3 in HMP solution**

**Peak 1: 272→289; 274→289**

|    |   |      |  | <b>272(HOMO-13)</b> |
|----|---|------|--|---------------------|
| 25 | S | 1S   |  | 0.00093             |
|    |   | 2S   |  | -0.00361            |
|    |   | 2PX  |  | 0.08902             |
|    |   | 2PY  |  | -0.00214            |
|    |   | 2PZ  |  | 0.00802             |
|    |   | 3S   |  | 0.01187             |
|    |   | 3PX  |  | -0.23399            |
|    |   | 3PY  |  | 0.00569             |
|    |   | 3PZ  |  | -0.02114            |
|    |   | 4S   |  | -0.00828            |
|    |   | 4PX  |  | -0.13447            |
|    |   | 4PY  |  | 0.01411             |
|    |   | 4PZ  |  | -0.01279            |
|    |   | 5D 0 |  | 0.00148             |
|    |   | 5D+1 |  | -0.00033            |
|    |   | 5D-1 |  | 0.00046             |
|    |   | 5D+2 |  | 0.00077             |
|    |   | 5D-2 |  | 0.00434             |
| 28 | S | 1S   |  | -0.00104            |
|    |   | 2S   |  | 0.00373             |
|    |   | 2PX  |  | -0.11389            |
|    |   | 2PY  |  | -0.01745            |
|    |   | 2PZ  |  | 0.00418             |
|    |   | 3S   |  | -0.01459            |
|    |   | 3PX  |  | 0.29944             |

|      |      |          |
|------|------|----------|
|      | 3PY  | 0.04474  |
|      | 3PZ  | -0.01091 |
|      | 4S   | 0.00001  |
|      | 4PX  | 0.17332  |
|      | 4PY  | 0.04126  |
|      | 4PZ  | -0.00759 |
|      | 5D 0 | -0.00062 |
|      | 5D+1 | 0.00018  |
|      | 5D-1 | -0.00033 |
|      | 5D+2 | -0.00183 |
|      | 5D-2 | 0.00491  |
| 33 S | 1S   | -0.00060 |
|      | 2S   | 0.00314  |
|      | 2PX  | 0.06604  |
|      | 2PY  | -0.08812 |
|      | 2PZ  | -0.00009 |
|      | 3S   | -0.00509 |
|      | 3PX  | -0.17421 |
|      | 3PY  | 0.23150  |
|      | 3PZ  | 0.00021  |
|      | 4S   | -0.02355 |
|      | 4PX  | -0.08193 |
|      | 4PY  | 0.15133  |
|      | 4PZ  | 0.00028  |
|      | 5D 0 | -0.00102 |
|      | 5D+1 | -0.00012 |
|      | 5D-1 | 0.00005  |
|      | 5D+2 | 0.00486  |
|      | 5D-2 | -0.00255 |
| 34 S | 1S   | 0.00066  |
|      | 2S   | -0.00326 |
|      | 2PX  | -0.04780 |
|      | 2PY  | -0.07543 |
|      | 2PZ  | -0.00550 |
|      | 3S   | 0.00619  |
|      | 3PX  | 0.12498  |
|      | 3PY  | 0.19850  |
|      | 3PZ  | 0.01439  |
|      | 4S   | 0.02703  |
|      | 4PX  | 0.06241  |
|      | 4PY  | 0.12807  |
|      | 4PZ  | 0.00979  |
|      | 5D 0 | 0.00067  |
|      | 5D+1 | -0.00001 |

|    |   |                     |          |
|----|---|---------------------|----------|
|    |   | 5D-1                | 0.00045  |
|    |   | 5D+2                | -0.00288 |
|    |   | 5D-2                | -0.00443 |
|    |   | .....               | .....    |
|    |   | .....               |          |
|    |   | <b>274(HOMO-11)</b> |          |
| 25 | S | 1S                  | 0.00084  |
|    |   | 2S                  | -0.00280 |
|    |   | 2PX                 | 0.09676  |
|    |   | 2PY                 | -0.02065 |
|    |   | 2PZ                 | -0.00703 |
|    |   | 3S                  | 0.01242  |
|    |   | 3PX                 | -0.25448 |
|    |   | 3PY                 | 0.05225  |
|    |   | 3PZ                 | 0.01845  |
|    |   | 4S                  | 0.01196  |
|    |   | 4PX                 | -0.15516 |
|    |   | 4PY                 | 0.04285  |
|    |   | 4PZ                 | 0.01218  |
|    |   | 5D 0                | -0.00079 |
|    |   | 5D+1                | -0.00005 |
|    |   | 5D-1                | -0.00050 |
|    |   | 5D+2                | 0.00146  |
|    |   | 5D-2                | 0.00249  |
| 26 | S | 1S                  | -0.00090 |
|    |   | 2S                  | 0.00318  |
|    |   | 2PX                 | -0.09827 |
|    |   | 2PY                 | 0.01618  |
|    |   | 2PZ                 | -0.00243 |
|    |   | 3S                  | -0.01290 |
|    |   | 3PX                 | 0.25847  |
|    |   | 3PY                 | -0.04102 |
|    |   | 3PZ                 | 0.00639  |
|    |   | 4S                  | -0.00512 |
|    |   | 4PX                 | 0.15445  |
|    |   | 4PY                 | -0.03727 |
|    |   | 4PZ                 | 0.00390  |
|    |   | 5D 0                | 0.00004  |
|    |   | 5D+1                | 0.00005  |
|    |   | 5D-1                | -0.00011 |
|    |   | 5D+2                | -0.00131 |
|    |   | 5D-2                | -0.00328 |
| 30 | S | 1S                  | -0.00023 |
|    |   | 2S                  | 0.00126  |



|    |   |                    |          |
|----|---|--------------------|----------|
|    |   | 2PX                | 0.05593  |
|    |   | 2PY                | 0.08484  |
|    |   | 2PZ                | 0.00099  |
|    |   | 3S                 | -0.00163 |
|    |   | 3PX                | -0.14748 |
|    |   | 3PY                | -0.22276 |
|    |   | 3PZ                | -0.00263 |
|    |   | 4S                 | -0.00249 |
|    |   | 4PX                | -0.08006 |
|    |   | 4PY                | -0.13912 |
|    |   | 4PZ                | -0.00140 |
|    |   | 5D 0               | -0.00086 |
|    |   | 5D+1               | -0.00012 |
|    |   | 5D-1               | -0.00013 |
|    |   | 5D+2               | 0.00406  |
|    |   | 5D-2               | 0.00321  |
| 34 | S | 1S                 | 0.00028  |
|    |   | 2S                 | -0.00143 |
|    |   | 2PX                | -0.05827 |
|    |   | 2PY                | -0.08272 |
|    |   | 2PZ                | 0.00669  |
|    |   | 3S                 | 0.00233  |
|    |   | 3PX                | 0.15436  |
|    |   | 3PY                | 0.21706  |
|    |   | 3PZ                | -0.01754 |
|    |   | 4S                 | -0.00495 |
|    |   | 4PX                | 0.08230  |
|    |   | 4PY                | 0.13372  |
|    |   | 4PZ                | -0.01158 |
|    |   | 5D 0               | 0.00104  |
|    |   | 5D+1               | 0.00035  |
|    |   | 5D-1               | -0.00027 |
|    |   | 5D+2               | -0.00495 |
|    |   | 5D-2               | -0.00239 |
|    |   | .....              |          |
|    |   | <b>289(LUMO+3)</b> |          |
| 2  | W | 1S                 | 0.00262  |
|    |   | 2S                 | 0.01871  |
|    |   | 3S                 | -0.04145 |
|    |   | 4PX                | -0.00458 |
|    |   | 4PY                | -0.00266 |
|    |   | 4PZ                | 0.00143  |
|    |   | 5PX                | -0.00658 |

|    |      |          |
|----|------|----------|
|    | 5PY  | 0.01363  |
|    | 5PZ  | 0.00118  |
|    | 6PX  | 0.23642  |
|    | 6PY  | -0.02885 |
|    | 6PZ  | -0.00048 |
|    | 7D 0 | -0.29977 |
|    | 7D+1 | -0.01177 |
|    | 7D-1 | -0.00686 |
|    | 7D+2 | 0.33881  |
|    | 7D-2 | -0.31293 |
|    | 8D 0 | -0.15086 |
|    | 8D+1 | -0.00676 |
|    | 8D-1 | -0.00303 |
|    | 8D+2 | 0.18262  |
|    | 8D-2 | -0.16186 |
|    | 9F 0 | -0.00010 |
|    | 9F+1 | 0.00093  |
|    | 9F-1 | -0.00033 |
|    | 9F+2 | 0.00003  |
|    | 9F-2 | 0.00002  |
|    | 9F+3 | -0.00024 |
|    | 9F-3 | -0.00087 |
| 12 | S 1S | -0.00098 |
|    | 2S   | 0.00403  |
|    | 2PX  | -0.05217 |
|    | 2PY  | 0.02139  |
|    | 2PZ  | 0.04078  |
|    | 3S   | -0.01227 |
|    | 3PX  | 0.13752  |
|    | 3PY  | -0.05570 |
|    | 3PZ  | -0.10810 |
|    | 4S   | -0.01165 |
|    | 4PX  | 0.16261  |
|    | 4PY  | -0.07061 |
|    | 4PZ  | -0.12494 |
|    | 5D 0 | 0.02421  |
|    | 5D+1 | -0.01151 |
|    | 5D-1 | 0.00582  |
|    | 5D+2 | -0.00795 |
|    | 5D-2 | 0.00829  |
| 20 | S 1S | -0.00091 |
|    | 2S   | 0.00385  |
|    | 2PX  | -0.05199 |
|    | 2PY  | 0.01884  |

|      |      |          |
|------|------|----------|
|      | 2PZ  | -0.04040 |
|      | 3S   | -0.01108 |
|      | 3PX  | 0.13689  |
|      | 3PY  | -0.04902 |
|      | 3PZ  | 0.10706  |
|      | 4S   | -0.01484 |
|      | 4PX  | 0.16064  |
|      | 4PY  | -0.06155 |
|      | 4PZ  | 0.12433  |
|      | 5D 0 | 0.02382  |
|      | 5D+1 | 0.01194  |
|      | 5D-1 | -0.00497 |
|      | 5D+2 | -0.00832 |
|      | 5D-2 | 0.00750  |
| 27 S | 1S   | -0.00042 |
|      | 2S   | 0.00139  |
|      | 2PX  | 0.05229  |
|      | 2PY  | 0.01341  |
|      | 2PZ  | 0.00030  |
|      | 3S   | -0.00659 |
|      | 3PX  | -0.13945 |
|      | 3PY  | -0.03608 |
|      | 3PZ  | -0.00073 |
|      | 4S   | 0.00704  |
|      | 4PX  | -0.15348 |
|      | 4PY  | -0.03080 |
|      | 4PZ  | -0.00172 |
|      | 5D 0 | -0.00255 |
|      | 5D+1 | -0.00008 |
|      | 5D-1 | 0.00020  |
|      | 5D+2 | -0.01057 |
|      | 5D-2 | 0.02299  |
| 32 S | 1S   | -0.00084 |
|      | 2S   | 0.00326  |
|      | 2PX  | 0.03575  |
|      | 2PY  | -0.04559 |
|      | 2PZ  | -0.00197 |
|      | 3S   | -0.01137 |
|      | 3PX  | -0.09436 |
|      | 3PY  | 0.12157  |
|      | 3PZ  | 0.00514  |
|      | 4S   | -0.01226 |
|      | 4PX  | -0.10769 |
|      | 4PY  | 0.13396  |

|    |   |      |          |
|----|---|------|----------|
|    |   | 4PZ  | 0.00606  |
|    |   | 5D 0 | -0.00267 |
|    |   | 5D+1 | 0.00080  |
|    |   | 5D-1 | 0.00011  |
|    |   | 5D+2 | -0.02345 |
|    |   | 5D-2 | 0.00635  |
| 3  | W | 1S   | -0.00130 |
|    |   | 2S   | -0.01089 |
|    |   | 3S   | 0.06833  |
|    |   | 4PX  | -0.00665 |
|    |   | 4PY  | 0.00525  |
|    |   | 4PZ  | -0.00030 |
|    |   | 5PX  | -0.01837 |
|    |   | 5PY  | -0.00008 |
|    |   | 5PZ  | 0.00023  |
|    |   | 6PX  | 0.06020  |
|    |   | 6PY  | 0.06751  |
|    |   | 6PZ  | 0.00371  |
|    |   | 7D 0 | 0.21276  |
|    |   | 7D+1 | -0.00315 |
|    |   | 7D-1 | 0.01829  |
|    |   | 7D+2 | -0.23081 |
|    |   | 7D-2 | -0.22945 |
|    |   | 8D 0 | 0.12452  |
|    |   | 8D+1 | -0.00197 |
|    |   | 8D-1 | 0.00868  |
|    |   | 8D+2 | -0.13523 |
|    |   | 8D-2 | -0.11192 |
|    |   | 9F 0 | 0.00003  |
|    |   | 9F+1 | -0.00116 |
|    |   | 9F-1 | 0.00003  |
|    |   | 9F+2 | -0.00006 |
|    |   | 9F-2 | -0.00001 |
|    |   | 9F+3 | -0.00169 |
|    |   | 9F-3 | -0.00146 |
| 15 | S | 1S   | 0.00077  |
|    |   | 2S   | -0.00267 |
|    |   | 2PX  | 0.03780  |
|    |   | 2PY  | 0.01028  |
|    |   | 2PZ  | -0.02790 |
|    |   | 3S   | 0.01129  |
|    |   | 3PX  | -0.10005 |
|    |   | 3PY  | -0.02635 |

|    |      |          |          |
|----|------|----------|----------|
|    | 3PZ  | 0.07418  |          |
|    | 4S   | -0.00731 |          |
|    | 4PX  | -0.12230 |          |
|    | 4PY  | -0.03992 |          |
|    | 4PZ  | 0.07871  |          |
|    | 5D 0 | -0.01716 |          |
|    | 5D+1 | 0.00833  |          |
|    | 5D-1 | 0.00296  |          |
|    | 5D+2 | 0.00698  |          |
|    | 5D-2 | 0.00529  |          |
| 18 | S    | 1S       | 0.00073  |
|    |      | 2S       | -0.00249 |
|    |      | 2PX      | 0.03607  |
|    |      | 2PY      | 0.01363  |
|    |      | 2PZ      | 0.02718  |
|    |      | 3S       | 0.01092  |
|    |      | 3PX      | -0.09545 |
|    |      | 3PY      | -0.03493 |
|    |      | 3PZ      | -0.07216 |
|    |      | 4S       | -0.00873 |
|    |      | 4PX      | -0.11633 |
|    |      | 4PY      | -0.05201 |
|    |      | 4PZ      | -0.07617 |
|    |      | 5D 0     | -0.01667 |
|    |      | 5D+1     | -0.00797 |
|    |      | 5D-1     | -0.00409 |
|    |      | 5D+2     | 0.00572  |
|    |      | 5D-2     | 0.00619  |
| 25 | S    | 1S       | 0.00280  |
|    |      | 2S       | -0.01180 |
|    |      | 2PX      | -0.06077 |
|    |      | 2PY      | 0.00965  |
|    |      | 2PZ      | 0.00212  |
|    |      | 3S       | 0.03364  |
|    |      | 3PX      | 0.16274  |
|    |      | 3PY      | -0.02808 |
|    |      | 3PZ      | -0.00547 |
|    |      | 4S       | 0.02817  |
|    |      | 4PX      | 0.16906  |
|    |      | 4PY      | -0.00903 |
|    |      | 4PZ      | -0.00738 |
|    |      | 5D 0     | 0.00343  |
|    |      | 5D+1     | -0.00050 |
|    |      | 5D-1     | -0.00103 |

|    |   |      |          |
|----|---|------|----------|
|    |   | 5D+2 | 0.00134  |
|    |   | 5D-2 | 0.01732  |
| 34 | S | 1S   | 0.00045  |
|    |   | 2S   | -0.00178 |
|    |   | 2PX  | -0.01705 |
|    |   | 2PY  | -0.04014 |
|    |   | 2PZ  | -0.00225 |
|    |   | 3S   | 0.00614  |
|    |   | 3PX  | 0.04328  |
|    |   | 3PY  | 0.10768  |
|    |   | 3PZ  | 0.00592  |
|    |   | 4S   | 0.01936  |
|    |   | 4PX  | 0.05632  |
|    |   | 4PY  | 0.12006  |
|    |   | 4PZ  | 0.00770  |
|    |   | 5D 0 | 0.00163  |
|    |   | 5D+1 | 0.00068  |
|    |   | 5D-1 | -0.00068 |
|    |   | 5D+2 | 0.01892  |
|    |   | 5D-2 | 0.00468  |

.....

**Peak 2: 272→298**

**272(HOMO-13)**

|    |   |      |          |
|----|---|------|----------|
| 25 | S | 1S   | 0.00093  |
|    |   | 2S   | -0.00361 |
|    |   | 2PX  | 0.08902  |
|    |   | 2PY  | -0.00214 |
|    |   | 2PZ  | 0.00802  |
|    |   | 3S   | 0.01187  |
|    |   | 3PX  | -0.23399 |
|    |   | 3PY  | 0.00569  |
|    |   | 3PZ  | -0.02114 |
|    |   | 4S   | -0.00828 |
|    |   | 4PX  | -0.13447 |
|    |   | 4PY  | 0.01411  |
|    |   | 4PZ  | -0.01279 |
|    |   | 5D 0 | 0.00148  |
|    |   | 5D+1 | -0.00033 |
|    |   | 5D-1 | 0.00046  |
|    |   | 5D+2 | 0.00077  |
|    |   | 5D-2 | 0.00434  |
| 28 | S | 1S   | -0.00104 |
|    |   | 2S   | 0.00373  |

|    |      |          |          |
|----|------|----------|----------|
|    | 2PX  | -0.11389 |          |
|    | 2PY  | -0.01745 |          |
|    | 2PZ  | 0.00418  |          |
|    | 3S   | -0.01459 |          |
|    | 3PX  | 0.29944  |          |
|    | 3PY  | 0.04474  |          |
|    | 3PZ  | -0.01091 |          |
|    | 4S   | 0.00001  |          |
|    | 4PX  | 0.17332  |          |
|    | 4PY  | 0.04126  |          |
|    | 4PZ  | -0.00759 |          |
|    | 5D 0 | -0.00062 |          |
|    | 5D+1 | 0.00018  |          |
|    | 5D-1 | -0.00033 |          |
|    | 5D+2 | -0.00183 |          |
|    | 5D-2 | 0.00491  |          |
| 33 | S    | 1S       | -0.00060 |
|    |      | 2S       | 0.00314  |
|    |      | 2PX      | 0.06604  |
|    |      | 2PY      | -0.08812 |
|    |      | 2PZ      | -0.00009 |
|    |      | 3S       | -0.00509 |
|    |      | 3PX      | -0.17421 |
|    |      | 3PY      | 0.23150  |
|    |      | 3PZ      | 0.00021  |
|    |      | 4S       | -0.02355 |
|    |      | 4PX      | -0.08193 |
|    |      | 4PY      | 0.15133  |
|    |      | 4PZ      | 0.00028  |
|    |      | 5D 0     | -0.00102 |
|    |      | 5D+1     | -0.00012 |
|    |      | 5D-1     | 0.00005  |
|    |      | 5D+2     | 0.00486  |
|    |      | 5D-2     | -0.00255 |
| 34 | S    | 1S       | 0.00066  |
|    |      | 2S       | -0.00326 |
|    |      | 2PX      | -0.04780 |
|    |      | 2PY      | -0.07543 |
|    |      | 2PZ      | -0.00550 |
|    |      | 3S       | 0.00619  |
|    |      | 3PX      | 0.12498  |
|    |      | 3PY      | 0.19850  |
|    |      | 3PZ      | 0.01439  |
|    |      | 4S       | 0.02703  |

|      |          |
|------|----------|
| 4PX  | 0.06241  |
| 4PY  | 0.12807  |
| 4PZ  | 0.00979  |
| 5D 0 | 0.00067  |
| 5D+1 | -0.00001 |
| 5D-1 | 0.00045  |
| 5D+2 | -0.00288 |
| 5D-2 | -0.00443 |

.....

**298(LUMO+12)**

|    |   |      |          |
|----|---|------|----------|
| 3  | W | 1S   | -0.00056 |
|    |   | 2S   | 0.00008  |
|    |   | 3S   | 0.01374  |
|    |   | 4PX  | -0.05883 |
|    |   | 4PY  | 0.08475  |
|    |   | 4PZ  | 0.00169  |
|    |   | 5PX  | 0.04631  |
|    |   | 5PY  | -0.02207 |
|    |   | 5PZ  | -0.00132 |
|    |   | 6PX  | -0.17833 |
|    |   | 6PY  | -0.01336 |
|    |   | 6PZ  | 0.00200  |
|    |   | 7D 0 | 0.05431  |
|    |   | 7D+1 | 0.00097  |
|    |   | 7D-1 | -0.00617 |
|    |   | 7D+2 | -0.23138 |
|    |   | 7D-2 | 0.28735  |
|    |   | 8D 0 | 0.03345  |
|    |   | 8D+1 | 0.00086  |
|    |   | 8D-1 | -0.00383 |
|    |   | 8D+2 | -0.16152 |
|    |   | 8D-2 | 0.18868  |
|    |   | 9F 0 | 0.00010  |
|    |   | 9F+1 | -0.00263 |
|    |   | 9F-1 | 0.00479  |
|    |   | 9F+2 | -0.00010 |
|    |   | 9F-2 | 0.00011  |
|    |   | 9F+3 | -0.00036 |
|    |   | 9F-3 | -0.00193 |
| 15 | S | 1S   | 0.00019  |
|    |   | 2S   | -0.00092 |
|    |   | 2PX  | 0.02823  |
|    |   | 2PY  | -0.04145 |



|    |      |          |          |
|----|------|----------|----------|
|    | 2PZ  | -0.00253 |          |
|    | 3S   | 0.00191  |          |
|    | 3PX  | -0.07539 |          |
|    | 3PY  | 0.11108  |          |
|    | 3PZ  | 0.00720  |          |
|    | 4S   | 0.00901  |          |
|    | 4PX  | -0.09481 |          |
|    | 4PY  | 0.12959  |          |
|    | 4PZ  | 0.01355  |          |
|    | 5D 0 | -0.00068 |          |
|    | 5D+1 | 0.01150  |          |
|    | 5D-1 | -0.02026 |          |
|    | 5D+2 | 0.00747  |          |
|    | 5D-2 | -0.00142 |          |
| 18 | S    | 1S       | 0.00012  |
|    |      | 2S       | -0.00054 |
|    |      | 2PX      | 0.02824  |
|    |      | 2PY      | -0.04157 |
|    |      | 2PZ      | 0.00076  |
|    |      | 3S       | 0.00133  |
|    |      | 3PX      | -0.07530 |
|    |      | 3PY      | 0.11127  |
|    |      | 3PZ      | -0.00248 |
|    |      | 4S       | 0.00605  |
|    |      | 4PX      | -0.09547 |
|    |      | 4PY      | 0.12996  |
|    |      | 4PZ      | -0.00734 |
|    |      | 5D 0     | 0.00019  |
|    |      | 5D+1     | -0.01173 |
|    |      | 5D-1     | 0.02005  |
|    |      | 5D+2     | 0.00749  |
|    |      | 5D-2     | -0.00131 |
| 25 | S    | 1S       | -0.00302 |
|    |      | 2S       | 0.01718  |
|    |      | 2PX      | 0.01656  |
|    |      | 2PY      | -0.04003 |
|    |      | 2PZ      | -0.00116 |
|    |      | 3S       | -0.02074 |
|    |      | 3PX      | -0.04393 |
|    |      | 3PY      | 0.10678  |
|    |      | 3PZ      | 0.00310  |
|    |      | 4S       | -0.16771 |
|    |      | 4PX      | -0.04014 |
|    |      | 4PY      | 0.18490  |

|    |   |      |          |
|----|---|------|----------|
|    |   | 4PZ  | 0.00356  |
|    |   | 5D 0 | -0.00183 |
|    |   | 5D+1 | 0.00019  |
|    |   | 5D-1 | 0.00047  |
|    |   | 5D+2 | -0.02454 |
|    |   | 5D-2 | -0.01085 |
| 34 | S | 1S   | 0.00421  |
|    |   | 2S   | -0.02414 |
|    |   | 2PX  | 0.04127  |
|    |   | 2PY  | -0.03690 |
|    |   | 2PZ  | -0.00047 |
|    |   | 3S   | 0.02814  |
|    |   | 3PX  | -0.11132 |
|    |   | 3PY  | 0.09932  |
|    |   | 3PZ  | 0.00126  |
|    |   | 4S   | 0.22750  |
|    |   | 4PX  | -0.17787 |
|    |   | 4PY  | 0.14653  |
|    |   | 4PZ  | 0.00255  |
|    |   | 5D 0 | 0.00517  |
|    |   | 5D+1 | 0.00035  |
|    |   | 5D-1 | -0.00042 |
|    |   | 5D+2 | 0.00108  |
|    |   | 5D-2 | 0.02449  |
| 4  | W | 1S   | 0.00023  |
|    |   | 2S   | -0.00092 |
|    |   | 3S   | -0.06241 |
|    |   | 4PX  | 0.04078  |
|    |   | 4PY  | 0.09855  |
|    |   | 4PZ  | -0.00163 |
|    |   | 5PX  | -0.04079 |
|    |   | 5PY  | -0.02867 |
|    |   | 5PZ  | 0.00146  |
|    |   | 6PX  | 0.18607  |
|    |   | 6PY  | -0.02805 |
|    |   | 6PZ  | -0.00294 |
|    |   | 7D 0 | 0.00137  |
|    |   | 7D+1 | 0.00036  |
|    |   | 7D-1 | -0.00720 |
|    |   | 7D+2 | 0.24584  |
|    |   | 7D-2 | 0.30836  |
|    |   | 8D 0 | 0.00059  |
|    |   | 8D+1 | -0.00003 |

|    |      |          |          |
|----|------|----------|----------|
|    | 8D-1 | -0.00426 |          |
|    | 8D+2 | 0.17217  |          |
|    | 8D-2 | 0.20011  |          |
|    | 9F 0 | -0.00009 |          |
|    | 9F+1 | 0.00330  |          |
|    | 9F-1 | 0.00477  |          |
|    | 9F+2 | 0.00013  |          |
|    | 9F-2 | 0.00011  |          |
|    | 9F+3 | 0.00053  |          |
|    | 9F-3 | -0.00135 |          |
| 17 | S    | 1S       | -0.00110 |
|    |      | 2S       | 0.00511  |
|    |      | 2PX      | -0.02146 |
|    |      | 2PY      | -0.04740 |
|    |      | 2PZ      | 0.00393  |
|    |      | 3S       | -0.01153 |
|    |      | 3PX      | 0.05729  |
|    |      | 3PY      | 0.12687  |
|    |      | 3PZ      | -0.01148 |
|    |      | 4S       | -0.02980 |
|    |      | 4PX      | 0.07005  |
|    |      | 4PY      | 0.15036  |
|    |      | 4PZ      | -0.01797 |
|    |      | 5D 0     | -0.00105 |
|    |      | 5D+1     | -0.00986 |
|    |      | 5D-1     | -0.02213 |
|    |      | 5D+2     | -0.00471 |
|    |      | 5D-2     | -0.00490 |
| 22 | S    | 1S       | -0.00102 |
|    |      | 2S       | 0.00468  |
|    |      | 2PX      | -0.02155 |
|    |      | 2PY      | -0.04750 |
|    |      | 2PZ      | -0.00240 |
|    |      | 3S       | -0.01087 |
|    |      | 3PX      | 0.05744  |
|    |      | 3PY      | 0.12697  |
|    |      | 3PZ      | 0.00739  |
|    |      | 4S       | -0.02638 |
|    |      | 4PX      | 0.07129  |
|    |      | 4PY      | 0.15064  |
|    |      | 4PZ      | 0.01256  |
|    |      | 5D 0     | -0.00174 |
|    |      | 5D+1     | 0.01013  |
|    |      | 5D-1     | 0.02201  |

|    |   |      |          |
|----|---|------|----------|
|    |   | 5D+2 | -0.00471 |
|    |   | 5D-2 | -0.00482 |
| 28 | S | 1S   | 0.00321  |
|    |   | 2S   | -0.01888 |
|    |   | 2PX  | -0.00965 |
|    |   | 2PY  | -0.04810 |
|    |   | 2PZ  | 0.00114  |
|    |   | 3S   | 0.01992  |
|    |   | 3PX  | 0.02615  |
|    |   | 3PY  | 0.12825  |
|    |   | 3PZ  | -0.00304 |
|    |   | 4S   | 0.19096  |
|    |   | 4PX  | 0.00330  |
|    |   | 4PY  | 0.21970  |
|    |   | 4PZ  | -0.00333 |
|    |   | 5D 0 | 0.00391  |
|    |   | 5D+1 | -0.00016 |
|    |   | 5D-1 | 0.00042  |
|    |   | 5D+2 | 0.02812  |
|    |   | 5D-2 | -0.00475 |
| 33 | S | 1S   | -0.00399 |
|    |   | 2S   | 0.02309  |
|    |   | 2PX  | -0.03623 |
|    |   | 2PY  | -0.03983 |
|    |   | 2PZ  | 0.00017  |
|    |   | 3S   | -0.02611 |
|    |   | 3PX  | 0.09815  |
|    |   | 3PY  | 0.10750  |
|    |   | 3PZ  | -0.00043 |
|    |   | 4S   | -0.22351 |
|    |   | 4PX  | 0.15213  |
|    |   | 4PY  | 0.15539  |
|    |   | 4PZ  | -0.00159 |
|    |   | 5D 0 | -0.00260 |
|    |   | 5D+1 | -0.00021 |
|    |   | 5D-1 | -0.00037 |
|    |   | 5D+2 | -0.00631 |
|    |   | 5D-2 | 0.02692  |

.....
